# Supplementary material for: Proton pump inhibitors affect the gut microbiome
Source: HighWire-hosted journal article supplement (doi:10.1136/gutjnl-2015-310376), 2015-12-09
Supplement: gutjnl-2015-310376supp_table1.xls [file gutjnl-2015-310376supp_table1.xls]

## Sheet: Phylum
Taxon	PPI_Cohort_1	no_PPI_Cohort_1	PPI_Cohort_2	no_PPI_Cohort_2	PPI_Cohort_3	nPPI_Cohort_3	Average_all
k__Archaea;p__Euryarchaeota	0.0162656	0.0125208	0.00239929	0.004292	0.00994364	0.00984893	0.00662096
k__Bacteria;p__Acidobacteria	5.08e-07	1.8e-08	0	0	0	0	0
k__Bacteria;p__Actinobacteria	0.108171	0.123753	0.0682425	0.0934679	0.100791	0.106172	0.0921683
k__Bacteria;p__Bacteroidetes	0.073329	0.0760393	0.135087	0.143272	0.0895712	0.0933734	0.115326
k__Bacteria;p__Chlamydiae	0	3.48e-08	0	0	0	0	0
k__Bacteria;p__Chloroflexi	0	7.98001e-09	0	0	0	0	0
k__Bacteria;p__Cyanobacteria	0.000380242	0.000472888	0.000690196	0.000368876	0.000134026	0.000184938	0.000344509
k__Bacteria;p__Deferribacteres	0	8.01001e-09	0	0	0	0	0
k__Bacteria;p__Elusimicrobia	4.03e-06	8.90001e-07	0	3.5601e-06	0	5.35002e-07	1.02378e-06
k__Bacteria;p__Firmicutes	0.771188	0.762599	0.750137	0.724893	0.781277	0.767627	0.755984
k__Bacteria;p__Fusobacteria	1.87592e-05	1.77969e-05	0.00376346	0.00333218	1.0809e-05	3.71939e-05	0.00178591
k__Bacteria;p__Lentisphaerae	2.8722e-05	2.86133e-05	7.159e-05	1.14263e-05	4.68599e-06	5.16082e-05	3.48276e-05
k__Bacteria;p__Planctomycetes	0	1.74e-08	0	0	0	0	0
k__Bacteria;p__Proteobacteria	0.0117213	0.00689643	0.0305187	0.023711	0.00624524	0.00764646	0.0170304
k__Bacteria;p__Spirochaetes	0	1.78265e-05	0	4.57013e-07	0	8.65003e-06	2.27676e-06
k__Bacteria;p__Synergistetes	2.44173e-05	2.24655e-05	1.846e-06	1.40914e-06	3.83047e-05	4.49261e-05	2.16215e-05
k__Bacteria;p__Tenericutes	0.00242591	0.00406602	0.000283339	0.000984472	0.00135601	0.00213147	0.00118882
k__Bacteria;p__Thermi	0	3.55e-08	0	0	0	0	0
k__Bacteria;p__TM6	0	4.95e-08	0	0	0	0	0
k__Bacteria;p__Verrucomicrobia	0.0164424	0.0135555	0.00880488	0.00566122	0.0106278	0.0128733	0.0094918
k__Bacteria;p__WPS-2	0	9.93001e-06	0	0	0	0	0

## Sheet: Class
Taxon	PPI_Cohort_1	no_PPI_Cohort_1	PPI_Cohort_2	no_PPI_Cohort_2	PPI_Cohort_3	no_PPI_Cohort_3
k__Archaea;p__Euryarchaeota;c__Methanobacteria	0.0162637	0.0125173	0.00239929	0.00428959	0.00994364	0.00984835
k__Archaea;p__Euryarchaeota;c__Thermoplasmata	1.903e-06	3.45412e-06	0	2.40807e-06	0	5.78302e-07
k__Bacteria;p__Acidobacteria;c__Acidobacteria-6	1.98e-07	0	0	0	0	0
k__Bacteria;p__Acidobacteria;c__Chloracidobacteria	3.1e-07	1.8e-08	0	0	0	0
k__Bacteria;p__Actinobacteria;c__Acidimicrobiia	0	1.287e-08	0	3.75011e-08	0	0
k__Bacteria;p__Actinobacteria;c__Actinobacteria	0.069879	0.0846864	0.0467867	0.0717561	0.0686952	0.0780641
k__Bacteria;p__Actinobacteria;c__Coriobacteriia	0.0382917	0.0390663	0.0214555	0.0217118	0.0320957	0.0281074
k__Bacteria;p__Actinobacteria;c__Rubrobacteria	0	2.67e-08	0	0	0	0
k__Bacteria;p__Actinobacteria;c__Thermoleophilia	0	4.1e-09	2.69e-07	0	0	1.53601e-07
k__Bacteria;p__Bacteroidetes;c__Bacteroidia	0.0733271	0.0760387	0.135087	0.143271	0.089571	0.0933733
k__Bacteria;p__Bacteroidetes;c__Cytophagia	0	3.43e-08	0	0	0	0
k__Bacteria;p__Bacteroidetes;c__Flavobacteriia	1.9269e-06	5.24841e-07	1.32e-07	1.11763e-06	1.72e-07	5.46002e-08
k__Bacteria;p__Bacteroidetes;c__Sphingobacteriia	0	5.94301e-08	0	1.68305e-07	0	1.15e-07
k__Bacteria;p__Chlamydiae;c__Chlamydiia	0	3.48e-08	0	0	0	0
k__Bacteria;p__Chloroflexi;c__Thermomicrobia	0	7.98001e-09	0	0	0	0
k__Bacteria;p__Cyanobacteria;c__4C0d-2	0.000221611	0.000341135	0.000573276	0.00022334	0.000103685	0.000170835
k__Bacteria;p__Cyanobacteria;c__Chloroplast	0.000158632	0.000131753	0.00011692	0.000145536	3.03414e-05	1.39508e-05
k__Bacteria;p__Cyanobacteria;c__Oscillatoriophycideae	0	0	0	0	0	1.53001e-07
k__Bacteria;p__Deferribacteres;c__Deferribacteres	0	8.01001e-09	0	0	0	0
k__Bacteria;p__Elusimicrobia;c__Elusimicrobia	4.03e-06	8.90001e-07	0	3.5601e-06	0	5.35002e-07
k__Bacteria;p__Firmicutes;c__Bacilli	0.0651124	0.0242255	0.11679	0.0407518	0.0749747	0.0178865
k__Bacteria;p__Firmicutes;c__Clostridia	0.659572	0.694136	0.593228	0.646562	0.655091	0.708187
k__Bacteria;p__Firmicutes;c__Erysipelotrichi	0.0465041	0.0442368	0.0401191	0.0375791	0.051212	0.0415531
k__Bacteria;p__Firmicutes;c__OPB54	0	1.38e-07	0	0	0	1.63001e-07
k__Bacteria;p__Fusobacteria;c__Fusobacteriia	1.87592e-05	1.77969e-05	0.00376346	0.00333218	1.0809e-05	3.71939e-05
k__Bacteria;p__Lentisphaerae;c__Lentisphaeria	2.8722e-05	2.86133e-05	7.159e-05	1.14263e-05	4.68599e-06	5.16082e-05
k__Bacteria;p__Planctomycetes;c__Planctomycetia	0	1.74e-08	0	0	0	0
k__Bacteria;p__Proteobacteria;c__Alphaproteobacteria	0.000447143	0.000410152	0.000975345	0.000911325	9.60699e-05	0.000331656
k__Bacteria;p__Proteobacteria;c__Betaproteobacteria	0.0011622	0.00165239	0.00749162	0.00871051	0.00200232	0.0019211
k__Bacteria;p__Proteobacteria;c__Deltaproteobacteria	0.000948916	0.00137077	0.00106808	0.00119017	0.00187485	0.00199348
k__Bacteria;p__Proteobacteria;c__Epsilonproteobacteria	5.8724e-06	3.69901e-06	1.9164e-05	7.66991e-05	6.16999e-06	3.68571e-06
k__Bacteria;p__Proteobacteria;c__Gammaproteobacteria	0.0091572	0.00345942	0.0209645	0.0128223	0.00226584	0.00339654
k__Bacteria;p__Spirochaetes;c__Spirochaetes	0	1.78265e-05	0	4.57013e-07	0	8.65003e-06
k__Bacteria;p__Synergistetes;c__Synergistia	2.44173e-05	2.24655e-05	1.846e-06	1.40914e-06	3.83047e-05	4.49261e-05
k__Bacteria;p__Tenericutes;c__Mollicutes	0.00239388	0.00398445	0.000247929	0.000858207	0.00135371	0.00209035
k__Bacteria;p__Tenericutes;c__RF3	3.203e-05	8.15741e-05	3.541e-05	0.000126265	2.293e-06	4.11151e-05
k__Bacteria;p__Thermi;c__Deinococci	0	3.55e-08	0	0	0	0
k__Bacteria;p__TM6;c__SJA-4	0	4.95e-08	0	0	0	0
k__Bacteria;p__Verrucomicrobia;c__Opitutae	1.548e-06	3.45e-07	0	0	0	3.44701e-06
k__Bacteria;p__Verrucomicrobia;c__Verruco-5	0	0	0	0	0	7.90603e-06
k__Bacteria;p__Verrucomicrobia;c__Verrucomicrobiae	0.0164409	0.0135551	0.00880488	0.00566122	0.0106278	0.012862
k__Bacteria;p__WPS-2;Other	0	9.93001e-06	0	0	0	0

## Sheet: Order
Taxon	PPI_Cohort_1	no_PPI_Cohort_1	PPI_Cohort_2	no_PPI_Cohort_2	PPI_Cohort_3	no_PPI_Cohort_3	Average_all
k__Archaea;p__Euryarchaeota;c__Methanobacteria;o__Methanobacteriales	0.0162637	0.0125173	0.00239929	0.00428959	0.00994364	0.00984835	0.00662022
k__Archaea;p__Euryarchaeota;c__Thermoplasmata;o__E2	1.903e-06	3.45412e-06	0	2.40807e-06	0	5.78302e-07	7.46593e-07
k__Bacteria;p__Acidobacteria;c__Acidobacteria-6;o__iii1-15	1.98e-07	0	0	0	0	0	0
k__Bacteria;p__Acidobacteria;c__Chloracidobacteria;o__RB41	3.1e-07	1.8e-08	0	0	0	0	0
k__Bacteria;p__Actinobacteria;c__Acidimicrobiia;o__Acidimicrobiales	0	1.287e-08	0	3.75011e-08	0	0	9.37527e-09
k__Bacteria;p__Actinobacteria;c__Actinobacteria;[o__Bifidobacteriales/o__Actinomycetales]	3.92e-06	1.23e-06	1.28e-05	6.7902e-07	1.61e-06	1.61001e-07	3.8125e-06
k__Bacteria;p__Actinobacteria;c__Actinobacteria;o__Actinomycetales	0.0016844	0.0010242	0.002623	0.00130976	0.00160534	0.000808144	0.00158656
k__Bacteria;p__Actinobacteria;c__Actinobacteria;o__Bifidobacteriales	0.0681907	0.083661	0.0441509	0.0704457	0.0670883	0.0772558	0.0647352
k__Bacteria;p__Actinobacteria;c__Coriobacteriia;o__Coriobacteriales	0.0382917	0.0390663	0.0214555	0.0217118	0.0320957	0.0281074	0.0258426
k__Bacteria;p__Actinobacteria;c__Rubrobacteria;o__Rubrobacterales	0	2.67e-08	0	0	0	0	0
k__Bacteria;p__Actinobacteria;c__Thermoleophilia;o__Gaiellales	0	4.1e-09	0	0	0	6.68002e-08	1.67001e-08
k__Bacteria;p__Actinobacteria;c__Thermoleophilia;o__Solirubrobacterales	0	0	2.69e-07	0	0	8.68003e-08	8.89501e-08
k__Bacteria;p__Bacteroidetes;c__Bacteroidia;o__Bacteroidales	0.0733271	0.0760387	0.135087	0.143271	0.089571	0.0933733	0.115326
k__Bacteria;p__Bacteroidetes;c__Cytophagia;o__Cytophagales	0	3.43e-08	0	0	0	0	0
k__Bacteria;p__Bacteroidetes;c__Flavobacteriia;o__Flavobacteriales	1.9269e-06	5.24841e-07	1.32e-07	1.11763e-06	1.72e-07	5.46002e-08	3.69058e-07
k__Bacteria;p__Bacteroidetes;c__Sphingobacteriia;o__Sphingobacteriales	0	5.94301e-08	0	1.68305e-07	0	1.15e-07	7.08263e-08
k__Bacteria;p__Chlamydiae;c__Chlamydiia;o__Chlamydiales	0	3.48e-08	0	0	0	0	0
k__Bacteria;p__Chloroflexi;c__Thermomicrobia;o__JG30-KF-CM45	0	7.98001e-09	0	0	0	0	0
k__Bacteria;p__Cyanobacteria;c__4C0d-2;o__MLE1-12	0	2.94e-08	0	0	0	0	0
k__Bacteria;p__Cyanobacteria;c__4C0d-2;o__YS2	0.000221611	0.000341106	0.000573276	0.00022334	0.000103685	0.000170835	0.000267784
k__Bacteria;p__Cyanobacteria;c__Chloroplast;o__Chlorophyta	0	0	0	0	0	6.68002e-08	1.67001e-08
k__Bacteria;p__Cyanobacteria;c__Chloroplast;o__Streptophyta	0.000158632	0.000131753	0.00011692	0.000145536	3.03414e-05	1.3884e-05	7.66702e-05
k__Bacteria;p__Cyanobacteria;c__Oscillatoriophycideae;o__Oscillatoriales	0	0	0	0	0	1.53001e-07	3.82501e-08
k__Bacteria;p__Deferribacteres;c__Deferribacteres;o__Deferribacterales	0	8.01001e-09	0	0	0	0	0
k__Bacteria;p__Elusimicrobia;c__Elusimicrobia;o__Elusimicrobiales	4.03e-06	8.90001e-07	0	3.5601e-06	0	5.35002e-07	1.02378e-06
k__Bacteria;p__Firmicutes;c__Bacilli;[o__Bacillales/o__Lactobacillales]	0	1.94e-08	0	0	0	6.57002e-08	1.64251e-08
k__Bacteria;p__Firmicutes;c__Bacilli;[o__Gemellales/o__Bacillales/o__Lactobacillales]	0	4.47e-08	0	1.15003e-07	0	1.88001e-07	7.5751e-08
k__Bacteria;p__Firmicutes;c__Bacilli;[o__Gemellales/o__Bacillales]	6.5e-07	0	0	0	0	0	0
k__Bacteria;p__Firmicutes;c__Bacilli;[o__Gemellales/o__Lactobacillales]	3.38e-07	3.03e-07	3.17e-07	4.02012e-06	5.20999e-07	2.06001e-07	1.26603e-06
k__Bacteria;p__Firmicutes;c__Bacilli;[o__Lactobacillales/o__Bacillales]	0	7.07001e-08	0	0	0	0	0
k__Bacteria;p__Firmicutes;c__Bacilli;o__Bacillales	0.000531382	7.66829e-05	0.000213673	0.000107298	4.32269e-05	4.29077e-05	0.000101776
k__Bacteria;p__Firmicutes;c__Bacilli;o__Gemellales	0.000129251	8.856e-05	0.000204854	0.000358416	0.000102834	6.79987e-05	0.000183526
k__Bacteria;p__Firmicutes;c__Bacilli;o__Lactobacillales	0.0606365	0.0201837	0.114254	0.0361218	0.0727542	0.015843	0.0597434
k__Bacteria;p__Firmicutes;c__Bacilli;o__Turicibacterales	0.00381436	0.00387621	0.00211646	0.00416008	0.00207391	0.00193215	0.00257065
k__Bacteria;p__Firmicutes;c__Clostridia;o__Clostridiales	0.659416	0.693976	0.593192	0.646475	0.655036	0.708114	0.650704
k__Bacteria;p__Firmicutes;c__Clostridia;o__OPB54	0	0	0	0	0	3.52001e-09	8.80003e-10
k__Bacteria;p__Firmicutes;c__Clostridia;o__SHA-98	2.313e-05	2.94517e-05	4.05e-06	1.44134e-05	1.564e-05	1.57306e-05	1.24585e-05
k__Bacteria;p__Firmicutes;c__Clostridia;Other	0.000132336	0.00013044	3.226e-05	7.31701e-05	3.88569e-05	5.67432e-05	5.02576e-05
k__Bacteria;p__Firmicutes;c__Erysipelotrichi;o__Erysipelotrichales	0.0465041	0.0442368	0.0401191	0.0375791	0.051212	0.0415531	0.0426158
k__Bacteria;p__Firmicutes;c__OPB54;Other	0	1.38e-07	0	0	0	1.63001e-07	4.07501e-08
k__Bacteria;p__Fusobacteria;c__Fusobacteriia;o__Fusobacteriales	1.87592e-05	1.77969e-05	0.00376346	0.00333218	1.0809e-05	3.71939e-05	0.00178591
k__Bacteria;p__Lentisphaerae;c__Lentisphaeria;o__Victivallales	2.8722e-05	2.8312e-05	7.159e-05	1.14263e-05	4.68599e-06	5.15803e-05	3.48206e-05
k__Bacteria;p__Lentisphaerae;c__Lentisphaeria;o__Z20	0	3.013e-07	0	0	0	2.79001e-08	6.97502e-09
k__Bacteria;p__Planctomycetes;c__Planctomycetia;o__Pirellulales	0	1.74e-08	0	0	0	0	0
k__Bacteria;p__Proteobacteria;c__Alphaproteobacteria;o__Caulobacterales	5.16e-07	4.47e-08	8.26e-07	2.68708e-07	5.34999e-07	0	4.07427e-07
k__Bacteria;p__Proteobacteria;c__Alphaproteobacteria;o__RF32	0.000422756	0.000383666	0.000950281	0.000878362	8.34899e-05	0.000324729	0.000559215
k__Bacteria;p__Proteobacteria;c__Alphaproteobacteria;o__Rhizobiales	4.26e-07	4.8889e-07	2.02e-06	5.70016e-07	4.12399e-06	1.2796e-06	1.9984e-06
k__Bacteria;p__Proteobacteria;c__Alphaproteobacteria;o__Rhodobacterales	0	6.03001e-08	0	7.26021e-07	0	0	1.81505e-07
k__Bacteria;p__Proteobacteria;c__Alphaproteobacteria;o__Rhodospirillales	0	6.26001e-08	2.69e-07	1.03003e-07	0	0	9.30007e-08
k__Bacteria;p__Proteobacteria;c__Alphaproteobacteria;o__Rickettsiales	2.17843e-05	2.42003e-05	2.1421e-05	3.06897e-05	7.92099e-06	2.99721e-06	1.57572e-05
k__Bacteria;p__Proteobacteria;c__Alphaproteobacteria;o__Sphingomonadales	3.1e-07	1.733e-07	5.28e-07	6.06018e-07	0	0	2.83504e-07
k__Bacteria;p__Proteobacteria;c__Alphaproteobacteria;Other	1.35e-06	1.456e-06	0	0	0	2.65001e-06	6.62502e-07
k__Bacteria;p__Proteobacteria;c__Betaproteobacteria;[o__Burkholderiales/o__Ellin6067]	0	1.63e-08	0	0	0	0	0
k__Bacteria;p__Proteobacteria;c__Betaproteobacteria;[o__Burkholderiales/o__Rhodocyclales]	0	3.86e-08	0	0	0	0	0
k__Bacteria;p__Proteobacteria;c__Betaproteobacteria;o__Burkholderiales	0.00115882	0.00165136	0.00748591	0.00869852	0.002001	0.00191915	0.00502614
k__Bacteria;p__Proteobacteria;c__Betaproteobacteria;o__Methylophilales	0	1.88e-08	0	0	0	0	0
k__Bacteria;p__Proteobacteria;c__Betaproteobacteria;o__Neisseriales	3.388e-06	8.15801e-07	5.71e-06	1.0928e-05	1.3198e-06	1.94277e-06	4.97515e-06
k__Bacteria;p__Proteobacteria;c__Betaproteobacteria;o__Nitrosomonadales	0	2.09e-08	0	0	0	0	0
k__Bacteria;p__Proteobacteria;c__Betaproteobacteria;o__Rhodocyclales	0	5.70001e-08	0	1.06603e-07	0	0	2.66508e-08
k__Bacteria;p__Proteobacteria;c__Betaproteobacteria;Other	0	6.20001e-08	0	9.53028e-07	0	0	2.38257e-07
k__Bacteria;p__Proteobacteria;c__Deltaproteobacteria;o__Desulfovibrionales	0.000948916	0.00137074	0.00106808	0.00118996	0.00187485	0.00199348	0.00153159
k__Bacteria;p__Proteobacteria;c__Deltaproteobacteria;o__Desulfuromonadales	0	1.56e-08	0	0	0	0	0
k__Bacteria;p__Proteobacteria;c__Deltaproteobacteria;o__Myxococcales	0	1.21e-08	0	2.13006e-07	0	0	5.32515e-08
k__Bacteria;p__Proteobacteria;c__Epsilonproteobacteria;o__Campylobacterales	5.8724e-06	3.69901e-06	1.9164e-05	7.66991e-05	6.16999e-06	3.68571e-06	2.64297e-05
k__Bacteria;p__Proteobacteria;c__Gammaproteobacteria;[o__Aeromonadales/o__Enterobacteriales]	5.03e-08	5.74001e-07	9.72e-06	1.16603e-06	1.53e-06	9.67003e-07	3.34576e-06
k__Bacteria;p__Proteobacteria;c__Gammaproteobacteria;[o__Aeromonadales/o__Vibrionales]	0	0	0	2.97009e-07	0	0	7.42521e-08
k__Bacteria;p__Proteobacteria;c__Gammaproteobacteria;[o__Pseudomonadales/o__Aeromonadales/o__Alteromonadales/o__Enterobacteriales]	0	0	0	5.95017e-07	0	0	1.48754e-07
k__Bacteria;p__Proteobacteria;c__Gammaproteobacteria;[o__Pseudomonadales/o__Enterobacteriales]	2.69e-07	0.000135942	4.25e-06	1.07003e-05	0	2.55001e-08	3.74395e-06
k__Bacteria;p__Proteobacteria;c__Gammaproteobacteria;o__Aeromonadales	0.000161332	0.00022872	0.00207416	0.00145509	0	5.29436e-05	0.000895549
k__Bacteria;p__Proteobacteria;c__Gammaproteobacteria;o__Alteromonadales	0	0	0	8.92026e-07	0	0	2.23006e-07
k__Bacteria;p__Proteobacteria;c__Gammaproteobacteria;o__Cardiobacteriales	5.41e-07	2.903e-07	9.51e-07	0	1.0728e-06	2.83961e-07	5.7694e-07
k__Bacteria;p__Proteobacteria;c__Gammaproteobacteria;o__Enterobacteriales	0.00795017	0.00258067	0.015669	0.00969974	0.00201655	0.0029697	0.00758873
k__Bacteria;p__Proteobacteria;c__Gammaproteobacteria;o__Legionellales	0	1.189e-07	0	0	0	6.68002e-08	1.67001e-08
k__Bacteria;p__Proteobacteria;c__Gammaproteobacteria;o__Oceanospirillales	0	4.141e-08	0	7.59022e-08	0	0	1.89755e-08
k__Bacteria;p__Proteobacteria;c__Gammaproteobacteria;o__Pasteurellales	0.00103754	0.000411307	0.00315796	0.00162103	0.000242989	0.000370031	0.001348
k__Bacteria;p__Proteobacteria;c__Gammaproteobacteria;o__Pseudomonadales	7.2914e-06	9.5567e-05	4.8524e-05	3.18359e-05	2.0288e-06	2.46779e-06	2.12141e-05
k__Bacteria;p__Proteobacteria;c__Gammaproteobacteria;o__Vibrionales	0	2.49e-08	0	0	0	0	0
k__Bacteria;p__Proteobacteria;c__Gammaproteobacteria;o__Xanthomonadales	0	6.16518e-06	0	8.69025e-07	1.672e-06	5.52002e-08	6.49056e-07
k__Bacteria;p__Spirochaetes;c__Spirochaetes;o__Spirochaetales	0	1.78265e-05	0	4.57013e-07	0	8.65003e-06	2.27676e-06
k__Bacteria;p__Synergistetes;c__Synergistia;o__Synergistales	2.44173e-05	2.24655e-05	1.846e-06	1.40914e-06	3.83047e-05	4.49261e-05	2.16215e-05
k__Bacteria;p__Tenericutes;c__Mollicutes;o__Anaeroplasmatales	5.964e-06	5.47471e-05	0	0.000101964	2.275e-06	8.76433e-05	4.79706e-05
k__Bacteria;p__Tenericutes;c__Mollicutes;o__Mycoplasmatales	0	0	0	1.37004e-06	0	9.63003e-08	3.66585e-07
k__Bacteria;p__Tenericutes;c__Mollicutes;o__RF39	0.00238791	0.0039297	0.000247929	0.000754873	0.00135144	0.00200261	0.00108921
k__Bacteria;p__Tenericutes;c__Mollicutes;Other	0	4.75e-09	0	0	0	0	0
k__Bacteria;p__Tenericutes;c__RF3;o__ML615J-28	3.203e-05	8.15741e-05	3.541e-05	0.000126265	2.293e-06	4.11151e-05	5.12707e-05
k__Bacteria;p__Thermi;c__Deinococci;o__Thermales	0	3.55e-08	0	0	0	0	0
k__Bacteria;p__TM6;c__SJA-4;Other	0	4.95e-08	0	0	0	0	0
k__Bacteria;p__Verrucomicrobia;c__Opitutae;o__Cerasicoccales	1.548e-06	3.45e-07	0	0	0	3.44701e-06	8.61753e-07
k__Bacteria;p__Verrucomicrobia;c__Verruco-5;o__WCHB1-41	0	0	0	0	0	7.90603e-06	1.97651e-06
k__Bacteria;p__Verrucomicrobia;c__Verrucomicrobiae;o__Verrucomicrobiales	0.0164409	0.0135551	0.00880488	0.00566122	0.0106278	0.012862	0.00948896
k__Bacteria;p__WPS-2;Other;Other	0	9.93001e-06	0	0	0	0	0

## Sheet: Family
Taxon	PPI_Cohort_1	no_PPI_Cohort_1	PPI_Cohort_2	no_PPI_Cohort_2	PPI_Cohort_3	no_PPI_Cohort_3	Average_all
k__Archaea;p__Euryarchaeota;c__Methanobacteria;o__Methanobacteriales;f__Methanobacteriaceae	0.0162637	0.0125173	0.00239929	0.00428959	0.00994364	0.00984835	0.00662022
k__Archaea;p__Euryarchaeota;c__Thermoplasmata;o__E2;f__Methanomassiliicoccaceae	1.903e-06	3.45412e-06	0	2.40807e-06	0	5.78302e-07	7.46593e-07
k__Bacteria;p__Acidobacteria;c__Acidobacteria-6;o__iii1-15;Other	1.98e-07	0	0	0	0	0	0
k__Bacteria;p__Acidobacteria;c__Chloracidobacteria;o__RB41;f__Ellin6075	3.1e-07	1.8e-08	0	0	0	0	0
k__Bacteria;p__Actinobacteria;c__Acidimicrobiia;o__Acidimicrobiales;f__Iamiaceae	0	9.34001e-09	0	0	0	0	0
k__Bacteria;p__Actinobacteria;c__Acidimicrobiia;o__Acidimicrobiales;f__JdFBGBact	0	3.53e-09	0	0	0	0	0
k__Bacteria;p__Actinobacteria;c__Acidimicrobiia;o__Acidimicrobiales;f__Microthrixaceae	0	0	0	3.75011e-08	0	0	9.37527e-09
k__Bacteria;p__Actinobacteria;c__Actinobacteria;[o__Bifidobacteriales/o__Actinomycetales];Other	3.92e-06	1.23e-06	1.28e-05	6.7902e-07	1.61e-06	1.61001e-07	3.8125e-06
k__Bacteria;p__Actinobacteria;c__Actinobacteria;o__Actinomycetales;[f__Micrococcaceae/f__Actinomycetaceae]	0	2.31e-08	0	0	0	0	0
k__Bacteria;p__Actinobacteria;c__Actinobacteria;o__Actinomycetales;[f__Streptomycetaceae/f__Pseudonocardiaceae]	0	1.99e-08	0	0	0	0	0
k__Bacteria;p__Actinobacteria;c__Actinobacteria;o__Actinomycetales;f__Actinomycetaceae	0.00111143	0.000840478	0.00123525	0.000986945	0.0010328	0.000681498	0.000984122
k__Bacteria;p__Actinobacteria;c__Actinobacteria;o__Actinomycetales;f__Brevibacteriaceae	1.33e-07	5.72711e-07	0	2.48807e-07	0	4.90202e-07	1.84752e-07
k__Bacteria;p__Actinobacteria;c__Actinobacteria;o__Actinomycetales;f__Cellulomonadaceae	0	1.6e-08	1.3e-06	0	0	0	3.25e-07
k__Bacteria;p__Actinobacteria;c__Actinobacteria;o__Actinomycetales;f__Corynebacteriaceae	0.000117049	7.26077e-05	0.000109588	7.42858e-05	3.96925e-05	3.61803e-05	6.49367e-05
k__Bacteria;p__Actinobacteria;c__Actinobacteria;o__Actinomycetales;f__Dermabacteraceae	0	1.888e-07	0	0	0	0	0
k__Bacteria;p__Actinobacteria;c__Actinobacteria;o__Actinomycetales;f__Dermacoccaceae	0	4.47e-09	0	9.89029e-07	0	0	2.47257e-07
k__Bacteria;p__Actinobacteria;c__Actinobacteria;o__Actinomycetales;f__Dietziaceae	0	0	0	0	0	8.57003e-08	2.14251e-08
k__Bacteria;p__Actinobacteria;c__Actinobacteria;o__Actinomycetales;f__Geodermatophilaceae	0	0	3.17e-07	0	0	0	7.925e-08
k__Bacteria;p__Actinobacteria;c__Actinobacteria;o__Actinomycetales;f__Intrasporangiaceae	0	9.91001e-08	0	0	0	0	0
k__Bacteria;p__Actinobacteria;c__Actinobacteria;o__Actinomycetales;f__Microbacteriaceae	1.09e-07	1.57957e-06	0	4.46513e-07	5.76999e-07	3.32701e-07	3.39053e-07
k__Bacteria;p__Actinobacteria;c__Actinobacteria;o__Actinomycetales;f__Micrococcaceae	0.000455574	0.00010771	0.00127574	0.000246664	0.000531521	8.91263e-05	0.000535762
k__Bacteria;p__Actinobacteria;c__Actinobacteria;o__Actinomycetales;f__Micromonosporaceae	0	4.706e-08	0	0	0	0	0
k__Bacteria;p__Actinobacteria;c__Actinobacteria;o__Actinomycetales;f__Mycobacteriaceae	0	2.36e-08	0	0	0	0	0
k__Bacteria;p__Actinobacteria;c__Actinobacteria;o__Actinomycetales;f__Nocardiaceae	0	3.301e-07	8.12e-07	0	7.50999e-07	4.27002e-07	4.975e-07
k__Bacteria;p__Actinobacteria;c__Actinobacteria;o__Actinomycetales;f__Nocardioidaceae	0	1.17e-08	0	0	0	0	0
k__Bacteria;p__Actinobacteria;c__Actinobacteria;o__Actinomycetales;f__Promicromonosporaceae	0	4.88e-08	0	0	0	0	0
k__Bacteria;p__Actinobacteria;c__Actinobacteria;o__Actinomycetales;f__Pseudonocardiaceae	1.03e-07	6.84101e-08	0	0	0	0	0
k__Bacteria;p__Actinobacteria;c__Actinobacteria;o__Actinomycetales;f__Tsukamurellaceae	0	0	0	0	0	3.52001e-09	8.80003e-10
k__Bacteria;p__Actinobacteria;c__Actinobacteria;o__Actinomycetales;f__Williamsiaceae	0	1.64e-08	0	0	0	0	0
k__Bacteria;p__Actinobacteria;c__Actinobacteria;o__Actinomycetales;Other	0	3.499e-07	0	1.77005e-07	0	0	4.42513e-08
k__Bacteria;p__Actinobacteria;c__Actinobacteria;o__Bifidobacteriales;f__Bifidobacteriaceae	0.0681907	0.083661	0.0441509	0.0704457	0.0670883	0.0772558	0.0647352
k__Bacteria;p__Actinobacteria;c__Coriobacteriia;o__Coriobacteriales;f__Coriobacteriaceae	0.0382917	0.0390663	0.0214555	0.0217118	0.0320957	0.0281074	0.0258426
k__Bacteria;p__Actinobacteria;c__Rubrobacteria;o__Rubrobacterales;f__Rubrobacteraceae	0	2.67e-08	0	0	0	0	0
k__Bacteria;p__Actinobacteria;c__Thermoleophilia;o__Gaiellales;f__Gaiellaceae	0	4.1e-09	0	0	0	0	0
k__Bacteria;p__Actinobacteria;c__Thermoleophilia;o__Gaiellales;Other	0	0	0	0	0	6.68002e-08	1.67001e-08
k__Bacteria;p__Actinobacteria;c__Thermoleophilia;o__Solirubrobacterales;f__Conexibacteraceae	0	0	0	0	0	8.68003e-08	2.17001e-08
k__Bacteria;p__Actinobacteria;c__Thermoleophilia;o__Solirubrobacterales;Other	0	0	2.69e-07	0	0	0	6.725e-08
k__Bacteria;p__Bacteroidetes;c__Bacteroidia;o__Bacteroidales;[f__[Barnesiellaceae]/f__S24-7]	7.67e-05	7.25001e-05	5.56e-05	0.000282496	7.14999e-05	0.000132836	0.000135608
k__Bacteria;p__Bacteroidetes;c__Bacteroidia;o__Bacteroidales;[f__Bacteroidaceae/f__Rikenellaceae]	5.5238e-05	7.83201e-05	8.137e-05	0.00014113	5.16299e-05	7.98903e-05	8.85051e-05
k__Bacteria;p__Bacteroidetes;c__Bacteroidia;o__Bacteroidales;f__Bacteroidaceae	0.0338815	0.0351678	0.0879827	0.0961541	0.0537647	0.0531108	0.0727531
k__Bacteria;p__Bacteroidetes;c__Bacteroidia;o__Bacteroidales;f__Barnesiellaceae	0.00184927	0.00187923	0.00222377	0.00450404	0.00108404	0.00266361	0.00261887
k__Bacteria;p__Bacteroidetes;c__Bacteroidia;o__Bacteroidales;f__Odoribacteraceae	0.000474118	0.000558103	0.00046884	0.000864244	0.000662472	0.000501625	0.000624295
k__Bacteria;p__Bacteroidetes;c__Bacteroidia;o__Bacteroidales;f__Paraprevotellaceae	0.002331	0.00254197	0.00168378	0.00327897	0.0025837	0.00306299	0.00265236
k__Bacteria;p__Bacteroidetes;c__Bacteroidia;o__Bacteroidales;f__Porphyromonadaceae	0.00453011	0.00448393	0.0103604	0.00976939	0.00959403	0.006929	0.00916321
k__Bacteria;p__Bacteroidetes;c__Bacteroidia;o__Bacteroidales;f__Prevotellaceae	0.018215	0.0176457	0.0241329	0.0145687	0.0110251	0.0122835	0.0155026
k__Bacteria;p__Bacteroidetes;c__Bacteroidia;o__Bacteroidales;f__RF16	0	1.85e-06	0	0	0	0.000135719	3.39299e-05
k__Bacteria;p__Bacteroidetes;c__Bacteroidia;o__Bacteroidales;f__Rikenellaceae	0.00772337	0.00918352	0.00710872	0.0118245	0.00684294	0.0104246	0.00905019
k__Bacteria;p__Bacteroidetes;c__Bacteroidia;o__Bacteroidales;f__S24-7	0.00374723	0.00364123	0.000833527	0.00161908	0.00338213	0.00310094	0.00223392
k__Bacteria;p__Bacteroidetes;c__Bacteroidia;o__Bacteroidales;Other	0.000443448	0.000784612	0.000155092	0.00026436	0.000508739	0.000947728	0.00046898
k__Bacteria;p__Bacteroidetes;c__Cytophagia;o__Cytophagales;f__Cytophagaceae	0	3.43e-08	0	0	0	0	0
k__Bacteria;p__Bacteroidetes;c__Flavobacteriia;o__Flavobacteriales;f__Flavobacteriaceae	0	2.044e-08	0	0	0	0	0
k__Bacteria;p__Bacteroidetes;c__Flavobacteriia;o__Flavobacteriales;f__Weeksellaceae	1.9269e-06	5.04401e-07	1.32e-07	1.11763e-06	1.72e-07	5.46002e-08	3.69058e-07
k__Bacteria;p__Bacteroidetes;c__Sphingobacteriia;o__Sphingobacteriales;f__Sphingobacteriaceae	0	5.94301e-08	0	1.68305e-07	0	1.15e-07	7.08263e-08
k__Bacteria;p__Chlamydiae;c__Chlamydiia;o__Chlamydiales;f__Chlamydiaceae	0	3.48e-08	0	0	0	0	0
k__Bacteria;p__Chloroflexi;c__Thermomicrobia;o__JG30-KF-CM45;Other	0	7.98001e-09	0	0	0	0	0
k__Bacteria;p__Cyanobacteria;c__4C0d-2;o__MLE1-12;Other	0	2.94e-08	0	0	0	0	0
k__Bacteria;p__Cyanobacteria;c__4C0d-2;o__YS2;Other	0.000221611	0.000341106	0.000573276	0.00022334	0.000103685	0.000170835	0.000267784
k__Bacteria;p__Cyanobacteria;c__Chloroplast;o__Chlorophyta;Other	0	0	0	0	0	6.68002e-08	1.67001e-08
k__Bacteria;p__Cyanobacteria;c__Chloroplast;o__Streptophyta;Other	0.000158632	0.000131753	0.00011692	0.000145536	3.03414e-05	1.3884e-05	7.66702e-05
k__Bacteria;p__Cyanobacteria;c__Oscillatoriophycideae;o__Oscillatoriales;f__Phormidiaceae	0	0	0	0	0	1.53001e-07	3.82501e-08
k__Bacteria;p__Deferribacteres;c__Deferribacteres;o__Deferribacterales;f__Deferribacteraceae	0	8.01001e-09	0	0	0	0	0
k__Bacteria;p__Elusimicrobia;c__Elusimicrobia;o__Elusimicrobiales;f__Elusimicrobiaceae	4.03e-06	8.90001e-07	0	3.5601e-06	0	5.35002e-07	1.02378e-06
k__Bacteria;p__Firmicutes;c__Bacilli;[o__Bacillales/o__Lactobacillales];Other	0	1.94e-08	0	0	0	6.57002e-08	1.64251e-08
k__Bacteria;p__Firmicutes;c__Bacilli;[o__Gemellales/o__Bacillales/o__Lactobacillales];Other	0	4.47e-08	0	1.15003e-07	0	1.88001e-07	7.5751e-08
k__Bacteria;p__Firmicutes;c__Bacilli;[o__Gemellales/o__Bacillales];Other	6.5e-07	0	0	0	0	0	0
k__Bacteria;p__Firmicutes;c__Bacilli;[o__Gemellales/o__Lactobacillales];Other	3.38e-07	3.03e-07	3.17e-07	4.02012e-06	5.20999e-07	2.06001e-07	1.26603e-06
k__Bacteria;p__Firmicutes;c__Bacilli;[o__Lactobacillales/o__Bacillales];Other	0	7.07001e-08	0	0	0	0	0
k__Bacteria;p__Firmicutes;c__Bacilli;o__Bacillales;[f__Bacillaceae/f__Staphylococcaceae]	2.17e-07	2.47e-07	0	2.04006e-07	0	4.08001e-08	6.12015e-08
k__Bacteria;p__Firmicutes;c__Bacilli;o__Bacillales;[f__Planococcaceae/f__Bacillaceae]	0	1.973e-08	0	1.39004e-07	0	6.55002e-08	5.11261e-08
k__Bacteria;p__Firmicutes;c__Bacilli;o__Bacillales;[f__Planococcaceae/f__Staphylococcaceae]	1.008e-06	3.18e-08	2.35e-06	3.3001e-08	0	0	5.9575e-07
k__Bacteria;p__Firmicutes;c__Bacilli;o__Bacillales;f__Bacillaceae	2.11903e-05	1.10499e-05	2.8358e-05	9.59528e-06	4.79999e-06	8.62787e-06	1.28453e-05
k__Bacteria;p__Firmicutes;c__Bacilli;o__Bacillales;f__Listeriaceae	0	4.918e-07	0	3.76071e-05	0	2.37801e-07	9.46122e-06
k__Bacteria;p__Firmicutes;c__Bacilli;o__Bacillales;f__Paenibacillaceae	2.824e-07	4.3498e-07	0	1.39004e-07	0	2.04401e-07	8.58512e-08
k__Bacteria;p__Firmicutes;c__Bacilli;o__Bacillales;f__Planococcaceae	8.64181e-05	1.71671e-05	5.9266e-05	2.06722e-05	1.8153e-05	1.80293e-05	2.90301e-05
k__Bacteria;p__Firmicutes;c__Bacilli;o__Bacillales;f__Sporolactobacillaceae	0	3.9e-08	0	0	0	0	0
k__Bacteria;p__Firmicutes;c__Bacilli;o__Bacillales;f__Staphylococcaceae	0.000422223	4.70391e-05	0.000123267	3.84222e-05	2.0274e-05	1.56523e-05	4.94039e-05
k__Bacteria;p__Firmicutes;c__Bacilli;o__Bacillales;f__Thermoactinomycetaceae	0	1.451e-07	0	4.86514e-07	0	0	1.21629e-07
k__Bacteria;p__Firmicutes;c__Bacilli;o__Bacillales;Other	4.34e-08	1.74e-08	4.32e-07	0	0	4.97002e-08	1.20425e-07
k__Bacteria;p__Firmicutes;c__Bacilli;o__Gemellales;f__Gemellaceae	0.000115155	8.62733e-05	0.000192024	0.000355476	0.000101244	6.62571e-05	0.00017875
k__Bacteria;p__Firmicutes;c__Bacilli;o__Gemellales;Other	1.4096e-05	2.2867e-06	1.283e-05	2.94008e-06	1.59e-06	1.74161e-06	4.77542e-06
k__Bacteria;p__Firmicutes;c__Bacilli;o__Lactobacillales;[f__Carnobacteriaceae/f__Aerococcaceae]	0	0	0	0	0	6.94002e-08	1.73501e-08
k__Bacteria;p__Firmicutes;c__Bacilli;o__Lactobacillales;[f__Carnobacteriaceae/f__Enterococcaceae]	4.23e-07	0	0	0	0	0	0
k__Bacteria;p__Firmicutes;c__Bacilli;o__Lactobacillales;[f__Lactobacillaceae/f__Streptococcaceae]	2.25e-07	1.623e-07	4.28e-07	1.25004e-06	0	3.88001e-07	5.16509e-07
k__Bacteria;p__Firmicutes;c__Bacilli;o__Lactobacillales;f__Aerococcaceae	4.78315e-05	2.56318e-05	0.00010269	6.20731e-05	5.31489e-05	3.30655e-05	6.27444e-05
k__Bacteria;p__Firmicutes;c__Bacilli;o__Lactobacillales;f__Carnobacteriaceae	7.88264e-05	3.93834e-05	0.00025845	0.000193888	8.55149e-05	5.18303e-05	0.000147421
k__Bacteria;p__Firmicutes;c__Bacilli;o__Lactobacillales;f__Enterococcaceae	0.00518104	0.000335148	0.00329144	0.00157252	0.000467767	0.000293819	0.00140639
k__Bacteria;p__Firmicutes;c__Bacilli;o__Lactobacillales;f__Lactobacillaceae	0.00633306	0.00228584	0.0349056	0.00819056	0.0105729	0.00196084	0.0139075
k__Bacteria;p__Firmicutes;c__Bacilli;o__Lactobacillales;f__Leuconostocaceae	0.000276678	0.000255183	0.000186997	0.000468592	0.000151501	0.000103334	0.000227606
k__Bacteria;p__Firmicutes;c__Bacilli;o__Lactobacillales;f__Streptococcaceae	0.0477059	0.0169679	0.0746837	0.0252102	0.0590452	0.0132055	0.0430361
k__Bacteria;p__Firmicutes;c__Bacilli;o__Lactobacillales;Other	0.00101251	0.00027438	0.000825147	0.000422806	0.0023782	0.000194166	0.00095508
k__Bacteria;p__Firmicutes;c__Bacilli;o__Turicibacterales;f__Turicibacteraceae	0.00381436	0.00387621	0.00211646	0.00416008	0.00207391	0.00193215	0.00257065
k__Bacteria;p__Firmicutes;c__Clostridia;o__Clostridiales;[f__[Mogibacteriaceae]/f__[Acidaminobacteraceae]]	2.17e-07	0	0	8.92026e-07	0	0	2.23006e-07
k__Bacteria;p__Firmicutes;c__Clostridia;o__Clostridiales;[f__Christensenellaceae/f__Ruminococcaceae]	3.62e-05	4.42e-05	6.41e-06	2.26007e-05	3.93999e-05	3.21001e-05	2.51277e-05
k__Bacteria;p__Firmicutes;c__Clostridia;o__Clostridiales;[f__Clostridiaceae/f__[Mogibacteriaceae]]	0.00142255	0.000939238	0.00110787	0.000903709	0.00114401	0.000697539	0.000963282
k__Bacteria;p__Firmicutes;c__Clostridia;o__Clostridiales;[f__Clostridiaceae/f__Lachnospiraceae]	8.12379e-05	0.000135413	1.7e-05	2.79538e-05	5.88769e-05	7.62663e-05	4.50242e-05
k__Bacteria;p__Firmicutes;c__Clostridia;o__Clostridiales;[f__Clostridiaceae/f__Peptostreptococcaceae]	4.615e-05	3.945e-05	3.763e-05	0.000120733	2.8603e-05	2.38501e-05	5.27041e-05
k__Bacteria;p__Firmicutes;c__Clostridia;o__Clostridiales;[f__Clostridiaceae/f__Veillonellaceae]	0.000748452	0.00142123	0.000951066	0.00100019	0.000314536	0.000720323	0.000746529
k__Bacteria;p__Firmicutes;c__Clostridia;o__Clostridiales;[f__Ruminococcaceae/f__[Mogibacteriaceae]]	0.0011006	0.00135719	0.000269089	0.000506471	0.000864945	0.00112681	0.00069183
k__Bacteria;p__Firmicutes;c__Clostridia;o__Clostridiales;[f__Ruminococcaceae/f__Clostridiaceae/f__Veillonellaceae]	0	8.32001e-08	0	0	0	7.67003e-08	1.91751e-08
k__Bacteria;p__Firmicutes;c__Clostridia;o__Clostridiales;[f__Ruminococcaceae/f__Clostridiaceae]	0.000228419	0.000315286	0.000180066	0.000229814	0.000227985	0.000531071	0.000292234
k__Bacteria;p__Firmicutes;c__Clostridia;o__Clostridiales;[f__Ruminococcaceae/f__Lachnospiraceae]	0.00516705	0.0051034	0.0045533	0.00557023	0.00621515	0.00656204	0.00572518
k__Bacteria;p__Firmicutes;c__Clostridia;o__Clostridiales;[f__Ruminococcaceae/f__Veillonellaceae]	2.25e-05	2.99e-05	0.000395578	4.38013e-05	1.93e-05	2.70001e-05	0.00012142
k__Bacteria;p__Firmicutes;c__Clostridia;o__Clostridiales;f__Christensenellaceae	0.00348718	0.00421414	0.000535702	0.00140489	0.00193162	0.00295646	0.00170717
k__Bacteria;p__Firmicutes;c__Clostridia;o__Clostridiales;f__Clostridiaceae	0.0366117	0.0397324	0.0161687	0.0257421	0.0186243	0.017939	0.0196185
k__Bacteria;p__Firmicutes;c__Clostridia;o__Clostridiales;f__Dehalobacteriaceae	0.000117281	0.000116781	9.853e-06	2.93044e-05	4.31429e-05	9.12364e-05	4.33842e-05
k__Bacteria;p__Firmicutes;c__Clostridia;o__Clostridiales;f__EtOH8	3.54e-06	6.15001e-06	3.07e-06	6.25018e-07	7.21999e-06	4.37002e-06	3.82126e-06
k__Bacteria;p__Firmicutes;c__Clostridia;o__Clostridiales;f__Eubacteriaceae	0.000255592	8.43311e-05	0.000810716	0.000136187	0.000139414	0.000131562	0.00030447
k__Bacteria;p__Firmicutes;c__Clostridia;o__Clostridiales;f__Lachnospiraceae	0.250677	0.240916	0.292209	0.291981	0.305862	0.307805	0.299464
k__Bacteria;p__Firmicutes;c__Clostridia;o__Clostridiales;f__Mogibacteriaceae	0.00218294	0.0019638	0.00203101	0.000949797	0.00144703	0.0014303	0.00146454
k__Bacteria;p__Firmicutes;c__Clostridia;o__Clostridiales;f__Peptococcaceae	0.00112707	0.00137531	0.000770919	0.00062746	0.00188792	0.000853495	0.00103495
k__Bacteria;p__Firmicutes;c__Clostridia;o__Clostridiales;f__Peptostreptococcaceae	0.0326382	0.0375688	0.0227956	0.0300999	0.0214133	0.0175043	0.0229533
k__Bacteria;p__Firmicutes;c__Clostridia;o__Clostridiales;f__Ruminococcaceae	0.23068	0.252871	0.153956	0.190383	0.207557	0.246768	0.199666
k__Bacteria;p__Firmicutes;c__Clostridia;o__Clostridiales;f__Syntrophomonadaceae	4.5e-07	1.729e-07	0	1.05023e-06	0	1.01e-07	2.87808e-07
k__Bacteria;p__Firmicutes;c__Clostridia;o__Clostridiales;f__Tisierellaceae	0	1.62e-08	0	0	0	0	0
k__Bacteria;p__Firmicutes;c__Clostridia;o__Clostridiales;f__Tissierellaceae	0.00016621	0.000190286	0.000662573	0.00117801	8.13347e-05	7.31487e-05	0.000498766
k__Bacteria;p__Firmicutes;c__Clostridia;o__Clostridiales;f__Veillonellaceae	0.0247714	0.0286013	0.0443613	0.0435612	0.018549	0.0231306	0.0324005
k__Bacteria;p__Firmicutes;c__Clostridia;o__Clostridiales;Other	0.0678441	0.07695	0.0513594	0.0519541	0.0685801	0.0796297	0.0628808
k__Bacteria;p__Firmicutes;c__Clostridia;o__OPB54;Other	0	0	0	0	0	3.52001e-09	8.80003e-10
k__Bacteria;p__Firmicutes;c__Clostridia;o__SHA-98;Other	2.313e-05	2.94517e-05	4.05e-06	1.44134e-05	1.564e-05	1.57306e-05	1.24585e-05
k__Bacteria;p__Firmicutes;c__Clostridia;Other;Other	0.000132336	0.00013044	3.226e-05	7.31701e-05	3.88569e-05	5.67432e-05	5.02576e-05
k__Bacteria;p__Firmicutes;c__Erysipelotrichi;o__Erysipelotrichales;f__Erysipelotrichaceae	0.0465041	0.0442368	0.0401191	0.0375791	0.051212	0.0415531	0.0426158
k__Bacteria;p__Firmicutes;c__OPB54;Other;Other	0	1.38e-07	0	0	0	1.63001e-07	4.07501e-08
k__Bacteria;p__Fusobacteria;c__Fusobacteriia;o__Fusobacteriales;f__Fusobacteriaceae	1.42737e-05	1.66207e-05	0.00375399	0.00332656	8.80499e-06	3.60523e-05	0.00178135
k__Bacteria;p__Fusobacteria;c__Fusobacteriia;o__Fusobacteriales;f__Leptotrichiaceae	4.4855e-06	1.17618e-06	9.473e-06	5.61716e-06	2.004e-06	1.1415e-06	4.55892e-06
k__Bacteria;p__Lentisphaerae;c__Lentisphaeria;o__Victivallales;f__Victivallaceae	2.8722e-05	2.8312e-05	7.159e-05	1.14263e-05	4.68599e-06	5.15803e-05	3.48206e-05
k__Bacteria;p__Lentisphaerae;c__Lentisphaeria;o__Z20;f__R4-45B	0	3.013e-07	0	0	0	2.79001e-08	6.97502e-09
k__Bacteria;p__Planctomycetes;c__Planctomycetia;o__Pirellulales;f__Pirellulaceae	0	1.74e-08	0	0	0	0	0
k__Bacteria;p__Proteobacteria;c__Alphaproteobacteria;o__Caulobacterales;f__Caulobacteraceae	5.16e-07	4.47e-08	8.26e-07	2.68708e-07	5.34999e-07	0	4.07427e-07
k__Bacteria;p__Proteobacteria;c__Alphaproteobacteria;o__RF32;Other	0.000422756	0.000383666	0.000950281	0.000878362	8.34899e-05	0.000324729	0.000559215
k__Bacteria;p__Proteobacteria;c__Alphaproteobacteria;o__Rhizobiales;f__Aurantimonadaceae	0	2.96e-08	0	0	0	0	0
k__Bacteria;p__Proteobacteria;c__Alphaproteobacteria;o__Rhizobiales;f__Bradyrhizobiaceae	0	1.5564e-07	0	0	0	0	0
k__Bacteria;p__Proteobacteria;c__Alphaproteobacteria;o__Rhizobiales;f__Brucellaceae	0	0	0	0	1.07e-06	0	2.675e-07
k__Bacteria;p__Proteobacteria;c__Alphaproteobacteria;o__Rhizobiales;f__Hyphomicrobiaceae	0	0	0	1.17003e-07	0	0	2.92508e-08
k__Bacteria;p__Proteobacteria;c__Alphaproteobacteria;o__Rhizobiales;f__Methylobacteriaceae	2.06e-07	1.6499e-07	0	3.84311e-07	3.054e-06	1.0644e-06	1.12568e-06
k__Bacteria;p__Proteobacteria;c__Alphaproteobacteria;o__Rhizobiales;f__Rhizobiaceae	1.17e-07	4.06e-08	2.02e-06	6.8702e-08	0	2.15201e-07	5.75976e-07
k__Bacteria;p__Proteobacteria;c__Alphaproteobacteria;o__Rhizobiales;Other	1.03e-07	9.80601e-08	0	0	0	0	0
k__Bacteria;p__Proteobacteria;c__Alphaproteobacteria;o__Rhodobacterales;f__Rhodobacteraceae	0	6.03001e-08	0	7.26021e-07	0	0	1.81505e-07
k__Bacteria;p__Proteobacteria;c__Alphaproteobacteria;o__Rhodospirillales;f__Acetobacteraceae	0	6.26001e-08	0	1.03003e-07	0	0	2.57507e-08
k__Bacteria;p__Proteobacteria;c__Alphaproteobacteria;o__Rhodospirillales;Other	0	0	2.69e-07	0	0	0	6.725e-08
k__Bacteria;p__Proteobacteria;c__Alphaproteobacteria;o__Rickettsiales;f__mitochondria	2.17843e-05	2.41614e-05	2.1421e-05	3.06897e-05	7.92099e-06	2.99721e-06	1.57572e-05
k__Bacteria;p__Proteobacteria;c__Alphaproteobacteria;o__Rickettsiales;Other	0	3.89e-08	0	0	0	0	0
k__Bacteria;p__Proteobacteria;c__Alphaproteobacteria;o__Sphingomonadales;f__Sphingomonadaceae	3.1e-07	1.733e-07	5.28e-07	6.06018e-07	0	0	2.83504e-07
k__Bacteria;p__Proteobacteria;c__Alphaproteobacteria;Other;Other	1.35e-06	1.456e-06	0	0	0	2.65001e-06	6.62502e-07
k__Bacteria;p__Proteobacteria;c__Betaproteobacteria;[o__Burkholderiales/o__Ellin6067];Other	0	1.63e-08	0	0	0	0	0
k__Bacteria;p__Proteobacteria;c__Betaproteobacteria;[o__Burkholderiales/o__Rhodocyclales];Other	0	3.86e-08	0	0	0	0	0
k__Bacteria;p__Proteobacteria;c__Betaproteobacteria;o__Burkholderiales;f__Alcaligenaceae	0.00108994	0.0015299	0.007455	0.00866524	0.00192767	0.00180063	0.00496214
k__Bacteria;p__Proteobacteria;c__Betaproteobacteria;o__Burkholderiales;f__Burkholderiaceae	1.0089e-06	1.03291e-05	4.14e-07	0	4.74999e-07	2.95701e-07	2.96175e-07
k__Bacteria;p__Proteobacteria;c__Betaproteobacteria;o__Burkholderiales;f__Comamonadaceae	8.74999e-07	3.72557e-06	3.89e-06	6.57419e-07	1.3955e-05	2.42054e-05	1.06769e-05
k__Bacteria;p__Proteobacteria;c__Betaproteobacteria;o__Burkholderiales;f__Oxalobacteraceae	6.5883e-05	0.000106658	2.5455e-05	2.89372e-05	5.88969e-05	9.30836e-05	5.15932e-05
k__Bacteria;p__Proteobacteria;c__Betaproteobacteria;o__Burkholderiales;Other	1.11e-06	7.49001e-07	1.15e-06	3.68011e-06	0	9.34703e-07	1.4412e-06
k__Bacteria;p__Proteobacteria;c__Betaproteobacteria;o__Methylophilales;f__Methylophilaceae	0	1.88e-08	0	0	0	0	0
k__Bacteria;p__Proteobacteria;c__Betaproteobacteria;o__Neisseriales;f__Neisseriaceae	3.388e-06	8.15801e-07	5.71e-06	1.0928e-05	1.3198e-06	1.94277e-06	4.97515e-06
k__Bacteria;p__Proteobacteria;c__Betaproteobacteria;o__Nitrosomonadales;Other	0	2.09e-08	0	0	0	0	0
k__Bacteria;p__Proteobacteria;c__Betaproteobacteria;o__Rhodocyclales;f__Rhodocyclaceae	0	5.70001e-08	0	1.06603e-07	0	0	2.66508e-08
k__Bacteria;p__Proteobacteria;c__Betaproteobacteria;Other;Other	0	6.20001e-08	0	9.53028e-07	0	0	2.38257e-07
k__Bacteria;p__Proteobacteria;c__Deltaproteobacteria;o__Desulfovibrionales;f__Desulfovibrionaceae	0.000948916	0.00137074	0.00106808	0.00118996	0.00187485	0.00199348	0.00153159
k__Bacteria;p__Proteobacteria;c__Deltaproteobacteria;o__Desulfuromonadales;f__Geobacteraceae	0	1.56e-08	0	0	0	0	0
k__Bacteria;p__Proteobacteria;c__Deltaproteobacteria;o__Myxococcales;f__0319-6G20	0	1.21e-08	0	2.13006e-07	0	0	5.32515e-08
k__Bacteria;p__Proteobacteria;c__Epsilonproteobacteria;o__Campylobacterales;f__Campylobacteraceae	5.8724e-06	3.6752e-06	1.9164e-05	7.66991e-05	6.16999e-06	3.15871e-06	2.6298e-05
k__Bacteria;p__Proteobacteria;c__Epsilonproteobacteria;o__Campylobacterales;f__Helicobacteraceae	0	2.381e-08	0	0	0	5.27002e-07	1.3175e-07
k__Bacteria;p__Proteobacteria;c__Gammaproteobacteria;[o__Aeromonadales/o__Enterobacteriales];Other	5.03e-08	5.74001e-07	9.72e-06	1.16603e-06	1.53e-06	9.67003e-07	3.34576e-06
k__Bacteria;p__Proteobacteria;c__Gammaproteobacteria;[o__Aeromonadales/o__Vibrionales];Other	0	0	0	2.97009e-07	0	0	7.42521e-08
k__Bacteria;p__Proteobacteria;c__Gammaproteobacteria;[o__Pseudomonadales/o__Aeromonadales/o__Alteromonadales/o__Enterobacteriales];Other	0	0	0	5.95017e-07	0	0	1.48754e-07
k__Bacteria;p__Proteobacteria;c__Gammaproteobacteria;[o__Pseudomonadales/o__Enterobacteriales];Other	2.69e-07	0.000135942	4.25e-06	1.07003e-05	0	2.55001e-08	3.74395e-06
k__Bacteria;p__Proteobacteria;c__Gammaproteobacteria;o__Aeromonadales;f__Aeromonadaceae	0	0	0	0.000496192	0	0	0.000124048
k__Bacteria;p__Proteobacteria;c__Gammaproteobacteria;o__Aeromonadales;f__Succinivibrionaceae	0.000161332	0.00022872	0.00207416	0.000958898	0	5.29436e-05	0.000771501
k__Bacteria;p__Proteobacteria;c__Gammaproteobacteria;o__Alteromonadales;f__Shewanellaceae	0	0	0	8.92026e-07	0	0	2.23006e-07
k__Bacteria;p__Proteobacteria;c__Gammaproteobacteria;o__Cardiobacteriales;f__Cardiobacteriaceae	5.41e-07	2.903e-07	9.51e-07	0	1.0728e-06	2.83961e-07	5.7694e-07
k__Bacteria;p__Proteobacteria;c__Gammaproteobacteria;o__Enterobacteriales;f__Enterobacteriaceae	0.00795017	0.00258067	0.015669	0.00969974	0.00201655	0.0029697	0.00758873
k__Bacteria;p__Proteobacteria;c__Gammaproteobacteria;o__Legionellales;f__Legionellaceae	0	7.87001e-08	0	0	0	6.68002e-08	1.67001e-08
k__Bacteria;p__Proteobacteria;c__Gammaproteobacteria;o__Legionellales;Other	0	4.02e-08	0	0	0	0	0
k__Bacteria;p__Proteobacteria;c__Gammaproteobacteria;o__Oceanospirillales;f__Halomonadaceae	0	4.141e-08	0	0	0	0	0
k__Bacteria;p__Proteobacteria;c__Gammaproteobacteria;o__Oceanospirillales;f__Oceanospirillaceae	0	0	0	7.59022e-08	0	0	1.89755e-08
k__Bacteria;p__Proteobacteria;c__Gammaproteobacteria;o__Pasteurellales;f__Pasteurellaceae	0.00103754	0.000411307	0.00315796	0.00162103	0.000242989	0.000370031	0.001348
k__Bacteria;p__Proteobacteria;c__Gammaproteobacteria;o__Pseudomonadales;[f__Pseudomonadaceae/f__Moraxellaceae]	1.29e-07	4.79e-08	0	6.05017e-07	0	0	1.51254e-07
k__Bacteria;p__Proteobacteria;c__Gammaproteobacteria;o__Pseudomonadales;f__Moraxellaceae	1.0464e-06	1.19841e-06	6.586e-06	2.2451e-05	1.943e-06	5.93202e-07	7.89331e-06
k__Bacteria;p__Proteobacteria;c__Gammaproteobacteria;o__Pseudomonadales;f__Pseudomonadaceae	6.116e-06	9.43207e-05	4.1938e-05	8.77985e-06	8.57999e-08	1.87459e-06	1.31696e-05
k__Bacteria;p__Proteobacteria;c__Gammaproteobacteria;o__Vibrionales;f__Pseudoalteromonadaceae	0	2.49e-08	0	0	0	0	0
k__Bacteria;p__Proteobacteria;c__Gammaproteobacteria;o__Xanthomonadales;f__Sinobacteraceae	0	8.57001e-09	0	2.79008e-07	0	0	6.9752e-08
k__Bacteria;p__Proteobacteria;c__Gammaproteobacteria;o__Xanthomonadales;f__Xanthomonadaceae	0	6.15661e-06	0	5.90017e-07	1.672e-06	5.52002e-08	5.79304e-07
k__Bacteria;p__Spirochaetes;c__Spirochaetes;o__Spirochaetales;f__Spirochaetaceae	0	1.78265e-05	0	4.57013e-07	0	8.65003e-06	2.27676e-06
k__Bacteria;p__Synergistetes;c__Synergistia;o__Synergistales;f__Dethiosulfovibrionaceae	4.97e-07	5.99401e-07	0	1.22514e-06	4.74999e-07	1.15e-07	4.53784e-07
k__Bacteria;p__Synergistetes;c__Synergistia;o__Synergistales;f__Synergistaceae	2.39203e-05	2.18661e-05	1.846e-06	1.84005e-07	3.78297e-05	4.48111e-05	2.11677e-05
k__Bacteria;p__Tenericutes;c__Mollicutes;o__Anaeroplasmatales;f__Anaeroplasmataceae	5.964e-06	5.47471e-05	0	0.000101964	2.275e-06	8.76433e-05	4.79706e-05
k__Bacteria;p__Tenericutes;c__Mollicutes;o__Mycoplasmatales;f__Mycoplasmataceae	0	0	0	1.37004e-06	0	9.63003e-08	3.66585e-07
k__Bacteria;p__Tenericutes;c__Mollicutes;o__RF39;Other	0.00238791	0.0039297	0.000247929	0.000754873	0.00135144	0.00200261	0.00108921
k__Bacteria;p__Tenericutes;c__Mollicutes;Other;Other	0	4.75e-09	0	0	0	0	0
k__Bacteria;p__Tenericutes;c__RF3;o__ML615J-28;Other	3.203e-05	8.15741e-05	3.541e-05	0.000126265	2.293e-06	4.11151e-05	5.12707e-05
k__Bacteria;p__Thermi;c__Deinococci;o__Thermales;f__Thermaceae	0	3.55e-08	0	0	0	0	0
k__Bacteria;p__TM6;c__SJA-4;Other;Other	0	4.95e-08	0	0	0	0	0
k__Bacteria;p__Verrucomicrobia;c__Opitutae;o__Cerasicoccales;f__Cerasicoccaceae	1.548e-06	3.45e-07	0	0	0	3.44701e-06	8.61753e-07
k__Bacteria;p__Verrucomicrobia;c__Verruco-5;o__WCHB1-41;f__RFP12	0	0	0	0	0	7.90603e-06	1.97651e-06
k__Bacteria;p__Verrucomicrobia;c__Verrucomicrobiae;o__Verrucomicrobiales;f__Verrucomicrobiaceae	0.0164409	0.0135551	0.00880488	0.00566122	0.0106278	0.012862	0.00948896
k__Bacteria;p__WPS-2;Other;Other;Other	0	9.93001e-06	0	0	0	0	0

## Sheet: Genus
Taxon	PPI_Cohort_1	no_PPI_Cohort_1	PPI_Cohort_2	no_PPI_Cohort_2	PPI_Cohort_3	no_PPI_Cohort_3	Average_all
k__Archaea;p__Euryarchaeota;c__Methanobacteria;o__Methanobacteriales;f__Methanobacteriaceae;g__Methanobacterium	5.27e-07	1.56005e-07	0	3.15e-08	0	0	1.19084e-07
k__Archaea;p__Euryarchaeota;c__Methanobacteria;o__Methanobacteriales;f__Methanobacteriaceae;g__Methanobrevibacter	0.014906	0.00370018	0.00239929	0.0117296	0.00813918	0.00939211	0.00837772
k__Archaea;p__Euryarchaeota;c__Methanobacteria;o__Methanobacteriales;f__Methanobacteriaceae;g__Methanosphaera	0.00134748	0.00058912	0	0.000786962	0.00179795	0.000456155	0.000829611
k__Archaea;p__Euryarchaeota;c__Methanobacteria;o__Methanobacteriales;f__Methanobacteriaceae;Other	9.69999e-06	1.33004e-07	0	7.01001e-07	6.50999e-06	8.92003e-08	2.85553e-06
k__Archaea;p__Euryarchaeota;c__Thermoplasmata;o__E2;f__Methanomassiliicoccaceae;g__Methanomassiliicoccus	3.76e-07	1.69005e-06	0	1.7478e-06	0	2.53001e-08	6.39858e-07
k__Archaea;p__Euryarchaeota;c__Thermoplasmata;o__E2;f__Methanomassiliicoccaceae;g__vadinCA11	1.527e-06	7.18021e-07	0	1.70632e-06	0	5.53002e-07	7.50724e-07
k__Bacteria;p__Acidobacteria;c__Acidobacteria-6;o__iii1-15;Other;Other	1.98e-07	0	0	0	0	0	3.3e-08
k__Bacteria;p__Acidobacteria;c__Chloracidobacteria;o__RB41;f__Ellin6075;Other	3.1e-07	0	0	1.8e-08	0	0	5.46666e-08
k__Bacteria;p__Actinobacteria;c__Acidimicrobiia;o__Acidimicrobiales;f__Iamiaceae;g__Iamia	0	0	0	9.34001e-09	0	0	1.55667e-09
k__Bacteria;p__Actinobacteria;c__Acidimicrobiia;o__Acidimicrobiales;f__JdFBGBact;Other	0	0	0	3.53e-09	0	0	5.88334e-10
k__Bacteria;p__Actinobacteria;c__Acidimicrobiia;o__Acidimicrobiales;f__Microthrixaceae;Other	0	3.75011e-08	0	0	0	0	6.25018e-09
k__Bacteria;p__Actinobacteria;c__Actinobacteria;[o__Bifidobacteriales/o__Actinomycetales];Other;Other	3.92e-06	6.7902e-07	1.28e-05	1.23e-06	1.61e-06	1.61001e-07	3.4e-06
k__Bacteria;p__Actinobacteria;c__Actinobacteria;o__Actinomycetales;[f__Micrococcaceae/f__Actinomycetaceae];Other	0	0	0	2.31e-08	0	0	3.85e-09
k__Bacteria;p__Actinobacteria;c__Actinobacteria;o__Actinomycetales;[f__Streptomycetaceae/f__Pseudonocardiaceae];Other	0	0	0	1.99e-08	0	0	3.31667e-09
k__Bacteria;p__Actinobacteria;c__Actinobacteria;o__Actinomycetales;f__Actinomycetaceae;g__Actinobaculum	2.24e-06	1.86305e-05	5.77e-07	3.8634e-06	0	4.51002e-07	4.29366e-06
k__Bacteria;p__Actinobacteria;c__Actinobacteria;o__Actinomycetales;f__Actinomycetaceae;g__Actinomyces	0.00102405	0.000861425	0.00119247	0.000721677	0.000972681	0.000630228	0.000900422
k__Bacteria;p__Actinobacteria;c__Actinobacteria;o__Actinomycetales;f__Actinomycetaceae;g__Arcanobacterium	0	6.15018e-07	0	2.679e-07	0	2.23101e-07	1.84336e-07
k__Bacteria;p__Actinobacteria;c__Actinobacteria;o__Actinomycetales;f__Actinomycetaceae;g__Mobiluncus	8.75999e-07	1.40854e-06	0	3.787e-06	6.95999e-07	2.99691e-06	1.62741e-06
k__Bacteria;p__Actinobacteria;c__Actinobacteria;o__Actinomycetales;f__Actinomycetaceae;g__Trueperella	0	8.30024e-08	5.54e-07	1.7e-08	0	2.36001e-07	1.48334e-07
k__Bacteria;p__Actinobacteria;c__Actinobacteria;o__Actinomycetales;f__Actinomycetaceae;g__Varibaculum	5.2173e-05	4.57943e-05	3.1567e-05	8.30345e-05	2.633e-05	2.92515e-05	4.46917e-05
k__Bacteria;p__Actinobacteria;c__Actinobacteria;o__Actinomycetales;f__Actinomycetaceae;Other	3.2089e-05	5.8989e-05	1.0084e-05	2.78309e-05	3.3088e-05	1.81113e-05	3.0032e-05
k__Bacteria;p__Actinobacteria;c__Actinobacteria;o__Actinomycetales;f__Brevibacteriaceae;g__Brevibacterium	1.33e-07	2.48807e-07	0	5.72711e-07	0	4.90202e-07	2.40787e-07
k__Bacteria;p__Actinobacteria;c__Actinobacteria;o__Actinomycetales;f__Cellulomonadaceae;g__Oerskovia	0	0	1.3e-06	0	0	0	2.16667e-07
k__Bacteria;p__Actinobacteria;c__Actinobacteria;o__Actinomycetales;f__Cellulomonadaceae;Other	0	0	0	1.6e-08	0	0	2.66667e-09
k__Bacteria;p__Actinobacteria;c__Actinobacteria;o__Actinomycetales;f__Corynebacteriaceae;g__Corynebacterium	0.000117049	7.42858e-05	0.000109588	7.26077e-05	3.96925e-05	3.61803e-05	7.49006e-05
k__Bacteria;p__Actinobacteria;c__Actinobacteria;o__Actinomycetales;f__Dermabacteraceae;g__Brachybacterium	0	0	0	2.62e-08	0	0	4.36667e-09
k__Bacteria;p__Actinobacteria;c__Actinobacteria;o__Actinomycetales;f__Dermabacteraceae;g__Dermabacter	0	0	0	5.35001e-08	0	0	8.91668e-09
k__Bacteria;p__Actinobacteria;c__Actinobacteria;o__Actinomycetales;f__Dermabacteraceae;Other	0	0	0	1.091e-07	0	0	1.81834e-08
k__Bacteria;p__Actinobacteria;c__Actinobacteria;o__Actinomycetales;f__Dermacoccaceae;g__Dermacoccus	0	9.89029e-07	0	4.47e-09	0	0	1.65583e-07
k__Bacteria;p__Actinobacteria;c__Actinobacteria;o__Actinomycetales;f__Dietziaceae;g__Dietzia	0	0	0	0	0	8.57003e-08	1.42834e-08
k__Bacteria;p__Actinobacteria;c__Actinobacteria;o__Actinomycetales;f__Geodermatophilaceae;g__Modestobacter	0	0	3.17e-07	0	0	0	5.28333e-08
k__Bacteria;p__Actinobacteria;c__Actinobacteria;o__Actinomycetales;f__Intrasporangiaceae;Other	0	0	0	9.91001e-08	0	0	1.65167e-08
k__Bacteria;p__Actinobacteria;c__Actinobacteria;o__Actinomycetales;f__Microbacteriaceae;[g__Cryocola/g__Leifsonia]	0	0	0	6.88001e-08	0	0	1.14667e-08
k__Bacteria;p__Actinobacteria;c__Actinobacteria;o__Actinomycetales;f__Microbacteriaceae;g__Agromyces	0	0	0	1.14e-08	0	0	1.9e-09
k__Bacteria;p__Actinobacteria;c__Actinobacteria;o__Actinomycetales;f__Microbacteriaceae;g__Clavibacter	0	8.30024e-08	0	7.98001e-09	0	0	1.51637e-08
k__Bacteria;p__Actinobacteria;c__Actinobacteria;o__Actinomycetales;f__Microbacteriaceae;g__Cryobacterium	0	2.59007e-08	0	0	0	0	4.31679e-09
k__Bacteria;p__Actinobacteria;c__Actinobacteria;o__Actinomycetales;f__Microbacteriaceae;g__Cryocola	0	0	0	1.27e-08	0	0	2.11667e-09
k__Bacteria;p__Actinobacteria;c__Actinobacteria;o__Actinomycetales;f__Microbacteriaceae;g__Curtobacterium	0	0	0	2.0025e-07	0	0	3.3375e-08
k__Bacteria;p__Actinobacteria;c__Actinobacteria;o__Actinomycetales;f__Microbacteriaceae;g__Frigoribacterium	0	0	0	3.4364e-07	0	6.29002e-08	6.77568e-08
k__Bacteria;p__Actinobacteria;c__Actinobacteria;o__Actinomycetales;f__Microbacteriaceae;g__Leucobacter	1.09e-07	0	0	2.272e-07	5.76999e-07	0	1.522e-07
k__Bacteria;p__Actinobacteria;c__Actinobacteria;o__Actinomycetales;f__Microbacteriaceae;g__Pseudoclavibacter	0	2.66008e-08	0	3.741e-07	0	5.85002e-08	7.65336e-08
k__Bacteria;p__Actinobacteria;c__Actinobacteria;o__Actinomycetales;f__Microbacteriaceae;g__Rathayibacter	0	0	0	0	0	2.93001e-08	4.88335e-09
k__Bacteria;p__Actinobacteria;c__Actinobacteria;o__Actinomycetales;f__Microbacteriaceae;g__Salinibacterium	0	0	0	6.71001e-08	0	0	1.11833e-08
k__Bacteria;p__Actinobacteria;c__Actinobacteria;o__Actinomycetales;f__Microbacteriaceae;Other	0	3.11009e-07	0	2.664e-07	0	1.82001e-07	1.26568e-07
k__Bacteria;p__Actinobacteria;c__Actinobacteria;o__Actinomycetales;f__Micrococcaceae;g__Arthrobacter	0	4.49713e-07	4.02e-07	4.7898e-07	4.32999e-07	5.10002e-07	3.78949e-07
k__Bacteria;p__Actinobacteria;c__Actinobacteria;o__Actinomycetales;f__Micrococcaceae;g__Kocuria	7.004e-07	5.52916e-07	7.04e-07	1.08059e-06	0	2.23601e-07	5.43585e-07
k__Bacteria;p__Actinobacteria;c__Actinobacteria;o__Actinomycetales;f__Micrococcaceae;g__Microbispora	0	0	0	5.34001e-09	0	0	8.90001e-10
k__Bacteria;p__Actinobacteria;c__Actinobacteria;o__Actinomycetales;f__Micrococcaceae;g__Micrococcus	0	0	7.04e-07	5.19001e-08	0	0	1.25983e-07
k__Bacteria;p__Actinobacteria;c__Actinobacteria;o__Actinomycetales;f__Micrococcaceae;g__Nesterenkonia	0	0	0	7.70001e-09	0	0	1.28333e-09
k__Bacteria;p__Actinobacteria;c__Actinobacteria;o__Actinomycetales;f__Micrococcaceae;g__Rothia	0.000453958	0.000244988	0.00127393	0.000105753	0.000531088	8.80997e-05	0.000449635
k__Bacteria;p__Actinobacteria;c__Actinobacteria;o__Actinomycetales;f__Micrococcaceae;g__Zhihengliuella	0	0	0	8.88001e-09	0	0	1.48e-09
k__Bacteria;p__Actinobacteria;c__Actinobacteria;o__Actinomycetales;f__Micrococcaceae;Other	9.15999e-07	6.73119e-07	0	3.243e-07	0	2.93001e-07	3.67737e-07
k__Bacteria;p__Actinobacteria;c__Actinobacteria;o__Actinomycetales;f__Micromonosporaceae;Other	0	0	0	4.706e-08	0	0	7.84334e-09
k__Bacteria;p__Actinobacteria;c__Actinobacteria;o__Actinomycetales;f__Mycobacteriaceae;g__Mycobacterium	0	0	0	2.36e-08	0	0	3.93334e-09
k__Bacteria;p__Actinobacteria;c__Actinobacteria;o__Actinomycetales;f__Nocardiaceae;g__Nocardia	0	0	0	1.54e-08	0	0	2.56667e-09
k__Bacteria;p__Actinobacteria;c__Actinobacteria;o__Actinomycetales;f__Nocardiaceae;g__Rhodococcus	0	0	8.12e-07	3.147e-07	7.50999e-07	4.27002e-07	3.84117e-07
k__Bacteria;p__Actinobacteria;c__Actinobacteria;o__Actinomycetales;f__Nocardioidaceae;Other	0	0	0	1.17e-08	0	0	1.95e-09
k__Bacteria;p__Actinobacteria;c__Actinobacteria;o__Actinomycetales;f__Promicromonosporaceae;g__Cellulosimicrobium	0	0	0	4.88e-08	0	0	8.13334e-09
k__Bacteria;p__Actinobacteria;c__Actinobacteria;o__Actinomycetales;f__Pseudonocardiaceae;g__Pseudonocardia	1.03e-07	0	0	7.91001e-09	0	0	1.8485e-08
k__Bacteria;p__Actinobacteria;c__Actinobacteria;o__Actinomycetales;f__Pseudonocardiaceae;g__Saccharopolyspora	0	0	0	6.05001e-08	0	0	1.00833e-08
k__Bacteria;p__Actinobacteria;c__Actinobacteria;o__Actinomycetales;f__Tsukamurellaceae;g__Tsukamurella	0	0	0	0	0	3.52001e-09	5.86669e-10
k__Bacteria;p__Actinobacteria;c__Actinobacteria;o__Actinomycetales;f__Williamsiaceae;g__Williamsia	0	0	0	1.64e-08	0	0	2.73334e-09
k__Bacteria;p__Actinobacteria;c__Actinobacteria;o__Actinomycetales;Other;Other	0	1.77005e-07	0	3.499e-07	0	0	8.78176e-08
k__Bacteria;p__Actinobacteria;c__Actinobacteria;o__Bifidobacteriales;f__Bifidobacteriaceae;g__Alloscardovia	0.000187106	5.52046e-05	0.00014224	2.6104e-05	0.000104959	2.35704e-05	8.9864e-05
k__Bacteria;p__Actinobacteria;c__Actinobacteria;o__Bifidobacteriales;f__Bifidobacteriaceae;g__Bifidobacterium	0.067912	0.0702763	0.0437076	0.0835709	0.0668775	0.0771831	0.0682546
k__Bacteria;p__Actinobacteria;c__Actinobacteria;o__Bifidobacteriales;f__Bifidobacteriaceae;g__Gardnerella	2.5874e-06	6.71389e-06	1.9275e-05	7.22465e-06	0	4.63064e-06	6.7386e-06
k__Bacteria;p__Actinobacteria;c__Actinobacteria;o__Bifidobacteriales;f__Bifidobacteriaceae;g__Scardovia	6.24493e-05	4.99444e-05	0.00024816	1.94497e-05	6.03299e-05	1.5808e-05	7.60235e-05
k__Bacteria;p__Actinobacteria;c__Actinobacteria;o__Bifidobacteriales;f__Bifidobacteriaceae;Other	2.66e-05	5.74937e-05	3.36e-05	3.73018e-05	4.55239e-05	2.87351e-05	3.82091e-05
k__Bacteria;p__Actinobacteria;c__Coriobacteriia;o__Coriobacteriales;f__Coriobacteriaceae;g__Adlercreutzia	0.00156506	0.000602818	0.00027781	0.0015528	0.00073833	0.000844969	0.000930298
k__Bacteria;p__Actinobacteria;c__Coriobacteriia;o__Coriobacteriales;f__Coriobacteriaceae;g__Atopobium	8.04524e-05	0.000151553	9.8646e-05	4.79675e-05	5.71569e-05	3.02745e-05	7.76751e-05
k__Bacteria;p__Actinobacteria;c__Coriobacteriia;o__Coriobacteriales;f__Coriobacteriaceae;g__Collinsella	0.0196532	0.0126787	0.0126436	0.0215679	0.0204881	0.0172841	0.0173859
k__Bacteria;p__Actinobacteria;c__Coriobacteriia;o__Coriobacteriales;f__Coriobacteriaceae;g__Eggerthella	0.000983118	0.00151853	0.00192369	0.000595073	0.00143217	0.000709011	0.0011936
k__Bacteria;p__Actinobacteria;c__Coriobacteriia;o__Coriobacteriales;f__Coriobacteriaceae;g__Enterococcus	0	0	0	2.6e-08	0	0	4.33334e-09
k__Bacteria;p__Actinobacteria;c__Coriobacteriia;o__Coriobacteriales;f__Coriobacteriaceae;g__Olsenella	6.0723e-06	4.38913e-06	3.73e-06	4.2107e-06	1.125e-05	1.205e-06	5.14285e-06
k__Bacteria;p__Actinobacteria;c__Coriobacteriia;o__Coriobacteriales;f__Coriobacteriaceae;g__Paraeggerthella	0	6.48019e-06	7.92e-07	0	0	1.56001e-07	1.23803e-06
k__Bacteria;p__Actinobacteria;c__Coriobacteriia;o__Coriobacteriales;f__Coriobacteriaceae;g__Slackia	0.000733984	0.000577286	0.000456102	0.000743623	0.000453463	0.000517267	0.000580287
k__Bacteria;p__Actinobacteria;c__Coriobacteriia;o__Coriobacteriales;f__Coriobacteriaceae;Other	0.0152698	0.00617201	0.00605115	0.0145548	0.00891523	0.00872044	0.00994724
k__Bacteria;p__Actinobacteria;c__Rubrobacteria;o__Rubrobacterales;f__Rubrobacteraceae;g__Rubrobacter	0	0	0	2.67e-08	0	0	4.45e-09
k__Bacteria;p__Actinobacteria;c__Thermoleophilia;o__Gaiellales;f__Gaiellaceae;Other	0	0	0	4.1e-09	0	0	6.83334e-10
k__Bacteria;p__Actinobacteria;c__Thermoleophilia;o__Gaiellales;Other;Other	0	0	0	0	0	6.68002e-08	1.11334e-08
k__Bacteria;p__Actinobacteria;c__Thermoleophilia;o__Solirubrobacterales;f__Conexibacteraceae;Other	0	0	0	0	0	8.68003e-08	1.44667e-08
k__Bacteria;p__Actinobacteria;c__Thermoleophilia;o__Solirubrobacterales;Other;Other	0	0	2.69e-07	0	0	0	4.48333e-08
k__Bacteria;p__Bacteroidetes;c__Bacteroidia;o__Bacteroidales;[f__[Barnesiellaceae]/f__S24-7];Other	7.67e-05	0.000282496	5.56e-05	7.25001e-05	7.14999e-05	0.000132836	0.000115272
k__Bacteria;p__Bacteroidetes;c__Bacteroidia;o__Bacteroidales;[f__Bacteroidaceae/f__Rikenellaceae];Other	5.5238e-05	0.00014113	8.137e-05	7.83201e-05	5.16299e-05	7.98903e-05	8.12631e-05
k__Bacteria;p__Bacteroidetes;c__Bacteroidia;o__Bacteroidales;f__Bacteroidaceae;g__Bacteroides	0.0338815	0.0961541	0.0879827	0.0351678	0.0537647	0.0531108	0.0600103
k__Bacteria;p__Bacteroidetes;c__Bacteroidia;o__Bacteroidales;f__Barnesiellaceae;g__Barnesiella	0.000234353	0.000349341	0.000145461	0.000127848	6.31959e-05	0.000276141	0.00019939
k__Bacteria;p__Bacteroidetes;c__Bacteroidia;o__Bacteroidales;f__Barnesiellaceae;Other	0.00161492	0.0041547	0.00207831	0.00175139	0.00102085	0.00238747	0.00216794
k__Bacteria;p__Bacteroidetes;c__Bacteroidia;o__Bacteroidales;f__Odoribacteraceae;g__Butyricimonas	0.000238613	0.000310627	0.000139871	0.000277374	0.000554525	0.00025659	0.000296267
k__Bacteria;p__Bacteroidetes;c__Bacteroidia;o__Bacteroidales;f__Odoribacteraceae;g__Odoribacter	0.000235505	0.000553617	0.000328969	0.000280729	0.000107947	0.000245035	0.000291967
k__Bacteria;p__Bacteroidetes;c__Bacteroidia;o__Bacteroidales;f__Paraprevotellaceae;g__CF231	0	0	0	1.27783e-05	0	2.13001e-07	2.16522e-06
k__Bacteria;p__Bacteroidetes;c__Bacteroidia;o__Bacteroidales;f__Paraprevotellaceae;g__Paraprevotella	0.00109584	0.00211616	0.00134732	0.00153464	0.00107998	0.00158069	0.0014591
k__Bacteria;p__Bacteroidetes;c__Bacteroidia;o__Bacteroidales;f__Paraprevotellaceae;g__Prevotella	0.000900398	0.0011055	0.00033199	0.00066292	0.00125373	0.00116319	0.000902956
k__Bacteria;p__Bacteroidetes;c__Bacteroidia;o__Bacteroidales;f__Paraprevotellaceae;g__YRC22	0	0	0	6.95001e-08	0	0	1.15833e-08
k__Bacteria;p__Bacteroidetes;c__Bacteroidia;o__Bacteroidales;f__Paraprevotellaceae;Other	0.00033477	5.73117e-05	4.47e-06	0.00033156	0.000249989	0.000318895	0.000216166
k__Bacteria;p__Bacteroidetes;c__Bacteroidia;o__Bacteroidales;f__Porphyromonadaceae;g__Dysgonomonas	0	2.33007e-06	0	0	5.18999e-07	0	4.74844e-07
k__Bacteria;p__Bacteroidetes;c__Bacteroidia;o__Bacteroidales;f__Porphyromonadaceae;g__Parabacteroides	0.00450885	0.00971462	0.010347	0.00445143	0.00958074	0.00692253	0.00758753
k__Bacteria;p__Bacteroidetes;c__Bacteroidia;o__Bacteroidales;f__Porphyromonadaceae;g__Porphyromonas	2.12548e-05	5.22219e-05	1.3461e-05	3.24954e-05	1.27728e-05	6.46868e-06	2.31124e-05
k__Bacteria;p__Bacteroidetes;c__Bacteroidia;o__Bacteroidales;f__Porphyromonadaceae;g__Tannerella	0	2.12006e-07	0	0	0	0	3.53344e-08
k__Bacteria;p__Bacteroidetes;c__Bacteroidia;o__Bacteroidales;f__Prevotellaceae;g__Prevotella	0.0181989	0.0145687	0.0241327	0.0176395	0.0110246	0.0122829	0.0163079
k__Bacteria;p__Bacteroidetes;c__Bacteroidia;o__Bacteroidales;f__Prevotellaceae;Other	1.6159e-05	0	2.07e-07	6.21261e-06	4.74999e-07	6.19002e-07	3.94543e-06
k__Bacteria;p__Bacteroidetes;c__Bacteroidia;o__Bacteroidales;f__RF16;Other	0	0	0	1.85e-06	0	0.000135719	2.29282e-05
k__Bacteria;p__Bacteroidetes;c__Bacteroidia;o__Bacteroidales;f__Rikenellaceae;g__AF12	0	0	0	2.27e-08	0	0	3.78334e-09
k__Bacteria;p__Bacteroidetes;c__Bacteroidia;o__Bacteroidales;f__Rikenellaceae;g__Alistipes	0.00295179	0.00571057	0.00306958	0.00315011	0.00199668	0.0035263	0.00340084
k__Bacteria;p__Bacteroidetes;c__Bacteroidia;o__Bacteroidales;f__Rikenellaceae;g__human	0.000271141	0.000113336	0.000241741	0.000500737	0.00036535	0.000462278	0.000325764
k__Bacteria;p__Bacteroidetes;c__Bacteroidia;o__Bacteroidales;f__Rikenellaceae;g__Rikenella	9.30999e-06	4.45013e-05	0	7.70001e-06	1.4006e-05	4.16001e-06	1.32795e-05
k__Bacteria;p__Bacteroidetes;c__Bacteroidia;o__Bacteroidales;f__Rikenellaceae;Other	0.00449112	0.00595613	0.0037974	0.00552495	0.0044669	0.00643186	0.00511139
k__Bacteria;p__Bacteroidetes;c__Bacteroidia;o__Bacteroidales;f__S24-7;Other	0.00374723	0.00161908	0.000833527	0.00364123	0.00338213	0.00310094	0.00272069
k__Bacteria;p__Bacteroidetes;c__Bacteroidia;o__Bacteroidales;Other;Other	0.000443448	0.00026436	0.000155092	0.000784612	0.000508739	0.000947728	0.00051733
k__Bacteria;p__Bacteroidetes;c__Cytophagia;o__Cytophagales;f__Cytophagaceae;g__Adhaeribacter	0	0	0	1.88e-08	0	0	3.13334e-09
k__Bacteria;p__Bacteroidetes;c__Cytophagia;o__Cytophagales;f__Cytophagaceae;g__Spirosoma	0	0	0	1.55e-08	0	0	2.58334e-09
k__Bacteria;p__Bacteroidetes;c__Flavobacteriia;o__Flavobacteriales;f__Flavobacteriaceae;g__Capnocytophaga	0	0	0	2.044e-08	0	0	3.40667e-09
k__Bacteria;p__Bacteroidetes;c__Flavobacteriia;o__Flavobacteriales;f__Weeksellaceae;g__Chryseobacterium	0	1.03003e-07	0	0	0	5.46002e-08	2.62672e-08
k__Bacteria;p__Bacteroidetes;c__Flavobacteriia;o__Flavobacteriales;f__Weeksellaceae;g__Cloacibacterium	1.817e-06	1.01463e-06	1.32e-07	4.501e-07	0	0	5.68955e-07
k__Bacteria;p__Bacteroidetes;c__Flavobacteriia;o__Flavobacteriales;f__Weeksellaceae;Other	1.099e-07	0	0	5.43001e-08	1.72e-07	0	5.60333e-08
k__Bacteria;p__Bacteroidetes;c__Sphingobacteriia;o__Sphingobacteriales;f__Sphingobacteriaceae;g__Pedobacter	0	5.13015e-08	0	3.163e-08	0	0	1.38219e-08
k__Bacteria;p__Bacteroidetes;c__Sphingobacteriia;o__Sphingobacteriales;f__Sphingobacteriaceae;g__Sphingobacterium	0	1.17003e-07	0	2.78e-08	0	1.15e-07	4.33006e-08
k__Bacteria;p__Chlamydiae;c__Chlamydiia;o__Chlamydiales;f__Chlamydiaceae;g__Chlamydia	0	0	0	3.48e-08	0	0	5.80001e-09
k__Bacteria;p__Chloroflexi;c__Thermomicrobia;o__JG30-KF-CM45;Other;Other	0	0	0	7.98001e-09	0	0	1.33e-09
k__Bacteria;p__Cyanobacteria;c__4C0d-2;o__MLE1-12;Other;Other	0	0	0	2.94e-08	0	0	4.9e-09
k__Bacteria;p__Cyanobacteria;c__4C0d-2;o__YS2;Other;Other	0.000221611	0.00022334	0.000573276	0.000341106	0.000103685	0.000170835	0.000272309
k__Bacteria;p__Cyanobacteria;c__Chloroplast;o__Chlorophyta;Other;Other	0	0	0	0	0	6.68002e-08	1.11334e-08
k__Bacteria;p__Cyanobacteria;c__Chloroplast;o__Streptophyta;Other;Other	0.000158632	0.000145536	0.00011692	0.000131753	3.03414e-05	1.3884e-05	9.95109e-05
k__Bacteria;p__Cyanobacteria;c__Oscillatoriophycideae;o__Oscillatoriales;f__Phormidiaceae;g__Arthrospira	0	0	0	0	0	1.53001e-07	2.55001e-08
k__Bacteria;p__Deferribacteres;c__Deferribacteres;o__Deferribacterales;f__Deferribacteraceae;g__Mucispirillum	0	0	0	8.01001e-09	0	0	1.335e-09
k__Bacteria;p__Elusimicrobia;c__Elusimicrobia;o__Elusimicrobiales;f__Elusimicrobiaceae;g__Elusimicrobium	4.03e-06	0	0	0	0	0	6.71666e-07
k__Bacteria;p__Elusimicrobia;c__Elusimicrobia;o__Elusimicrobiales;f__Elusimicrobiaceae;Other	0	3.5601e-06	0	8.90001e-07	0	5.35002e-07	8.30851e-07
k__Bacteria;p__Firmicutes;c__Bacilli;[o__Bacillales/o__Lactobacillales];Other;Other	0	0	0	1.94e-08	0	6.57002e-08	1.41834e-08
k__Bacteria;p__Firmicutes;c__Bacilli;[o__Gemellales/o__Bacillales];Other;Other	6.5e-07	0	0	0	0	0	1.08333e-07
k__Bacteria;p__Firmicutes;c__Bacilli;[o__Gemellales/o__Bacillales/o__Lactobacillales];Other;Other	0	1.15003e-07	0	4.47e-08	0	1.88001e-07	5.79507e-08
k__Bacteria;p__Firmicutes;c__Bacilli;[o__Gemellales/o__Lactobacillales];Other;Other	3.38e-07	4.02012e-06	3.17e-07	3.03e-07	5.20999e-07	2.06001e-07	9.50853e-07
k__Bacteria;p__Firmicutes;c__Bacilli;[o__Lactobacillales/o__Bacillales];Other;Other	0	0	0	7.07001e-08	0	0	1.17833e-08
k__Bacteria;p__Firmicutes;c__Bacilli;o__Bacillales;[f__Bacillaceae/f__Staphylococcaceae];Other	2.17e-07	2.04006e-07	0	2.47e-07	0	4.08001e-08	1.18134e-07
k__Bacteria;p__Firmicutes;c__Bacilli;o__Bacillales;[f__Planococcaceae/f__Bacillaceae];Other	0	1.39004e-07	0	1.973e-08	0	6.55002e-08	3.73724e-08
k__Bacteria;p__Firmicutes;c__Bacilli;o__Bacillales;[f__Planococcaceae/f__Staphylococcaceae];Other	1.008e-06	3.3001e-08	2.35e-06	3.18e-08	0	0	5.70467e-07
k__Bacteria;p__Firmicutes;c__Bacilli;o__Bacillales;f__Bacillaceae;g__Anaerobacillus	7.75e-07	4.43013e-08	0	2.8e-07	0	5.37002e-08	1.92167e-07
k__Bacteria;p__Firmicutes;c__Bacilli;o__Bacillales;f__Bacillaceae;g__Anoxybacillus	2.17e-07	7.52022e-07	0	2.0188e-07	0	2.02301e-07	2.28867e-07
k__Bacteria;p__Firmicutes;c__Bacilli;o__Bacillales;f__Bacillaceae;g__Bacillus	1.70299e-05	6.9349e-06	2.3509e-05	6.49282e-06	3.45499e-06	5.61096e-06	1.05054e-05
k__Bacteria;p__Firmicutes;c__Bacilli;o__Bacillales;f__Bacillaceae;g__Geobacillus	3.28e-07	0	4.6e-07	2.58965e-06	0	1.77181e-06	8.58243e-07
k__Bacteria;p__Firmicutes;c__Bacilli;o__Bacillales;f__Bacillaceae;g__Virgibacillus	0	0	0	1.53e-08	0	0	2.55e-09
k__Bacteria;p__Firmicutes;c__Bacilli;o__Bacillales;f__Bacillaceae;Other	2.8404e-06	1.86405e-06	4.389e-06	1.47028e-06	1.345e-06	9.89104e-07	2.14964e-06
k__Bacteria;p__Firmicutes;c__Bacilli;o__Bacillales;f__Listeriaceae;g__Brochothrix	0	3.76071e-05	0	4.918e-07	0	2.37801e-07	6.38945e-06
k__Bacteria;p__Firmicutes;c__Bacilli;o__Bacillales;f__Paenibacillaceae;g__Brevibacillus	4.34e-08	1.39004e-07	0	5.82001e-08	0	1.3e-07	6.17674e-08
k__Bacteria;p__Firmicutes;c__Bacilli;o__Bacillales;f__Paenibacillaceae;g__Paenibacillus	2.39e-07	0	0	3.7678e-07	0	7.44003e-08	1.1503e-07
k__Bacteria;p__Firmicutes;c__Bacilli;o__Bacillales;f__Planococcaceae;[g__Kurthia/g__Rummeliibacillus]	0	0	0	4.25e-08	0	0	7.08334e-09
k__Bacteria;p__Firmicutes;c__Bacilli;o__Bacillales;f__Planococcaceae;g__Aeribacillus	0	0	0	2.54e-08	0	0	4.23334e-09
k__Bacteria;p__Firmicutes;c__Bacilli;o__Bacillales;f__Planococcaceae;g__Bacillus	1.539e-06	1.73005e-07	0	7.21001e-07	0	4.01101e-07	4.72351e-07
k__Bacteria;p__Firmicutes;c__Bacilli;o__Bacillales;f__Planococcaceae;g__Lysinibacillus	6.424e-07	2.00006e-07	0	1.618e-07	0	0	1.67368e-07
k__Bacteria;p__Firmicutes;c__Bacilli;o__Bacillales;f__Planococcaceae;g__Planococcus	4.34e-08	0	0	0	0	0	7.23333e-09
k__Bacteria;p__Firmicutes;c__Bacilli;o__Bacillales;f__Planococcaceae;g__Planomicrobium	0	0	0	9.71001e-09	0	0	1.61833e-09
k__Bacteria;p__Firmicutes;c__Bacilli;o__Bacillales;f__Planococcaceae;g__Rummeliibacillus	0	0	0	0	0	3.99001e-08	6.65002e-09
k__Bacteria;p__Firmicutes;c__Bacilli;o__Bacillales;f__Planococcaceae;g__Solibacillus	4.71e-05	1.29004e-05	3.22e-05	8.49611e-06	5.31999e-06	5.53992e-06	1.85927e-05
k__Bacteria;p__Firmicutes;c__Bacilli;o__Bacillales;f__Planococcaceae;g__Sporosarcina	0	0	0	1.433e-08	0	0	2.38834e-09
k__Bacteria;p__Firmicutes;c__Bacilli;o__Bacillales;f__Planococcaceae;g__Ureibacillus	0	2.12006e-07	0	7.65001e-08	4.24999e-07	0	1.18918e-07
k__Bacteria;p__Firmicutes;c__Bacilli;o__Bacillales;f__Planococcaceae;Other	3.70934e-05	7.18681e-06	2.7066e-05	7.61971e-06	1.2408e-05	1.20484e-05	1.7237e-05
k__Bacteria;p__Firmicutes;c__Bacilli;o__Bacillales;f__Sporolactobacillaceae;Other	0	0	0	3.9e-08	0	0	6.50001e-09
k__Bacteria;p__Firmicutes;c__Bacilli;o__Bacillales;f__Staphylococcaceae;g__Jeotgalicoccus	0	0	0	5.14001e-08	0	5.61002e-08	1.79167e-08
k__Bacteria;p__Firmicutes;c__Bacilli;o__Bacillales;f__Staphylococcaceae;g__Macrococcus	3.92e-07	0	0	1.5538e-07	0	0	9.123e-08
k__Bacteria;p__Firmicutes;c__Bacilli;o__Bacillales;f__Staphylococcaceae;g__Staphylococcus	0.000421831	3.84222e-05	0.000123267	4.68323e-05	2.0274e-05	1.55962e-05	0.000111037
k__Bacteria;p__Firmicutes;c__Bacilli;o__Bacillales;f__Thermoactinomycetaceae;g__Planifilum	0	0	0	6.78001e-08	0	0	1.13e-08
k__Bacteria;p__Firmicutes;c__Bacilli;o__Bacillales;f__Thermoactinomycetaceae;g__Thermoactinomyces	0	4.86514e-07	0	1.23e-08	0	0	8.31357e-08
k__Bacteria;p__Firmicutes;c__Bacilli;o__Bacillales;f__Thermoactinomycetaceae;Other	0	0	0	6.50001e-08	0	0	1.08333e-08
k__Bacteria;p__Firmicutes;c__Bacilli;o__Bacillales;Other;Other	4.34e-08	0	4.32e-07	1.74e-08	0	4.97002e-08	9.04167e-08
k__Bacteria;p__Firmicutes;c__Bacilli;o__Gemellales;f__Gemellaceae;g__Gemella	2.86701e-05	0.000127199	6.4266e-05	2.6289e-05	2.5368e-05	1.84347e-05	4.83711e-05
k__Bacteria;p__Firmicutes;c__Bacilli;o__Gemellales;f__Gemellaceae;Other	8.64853e-05	0.000228277	0.000127758	5.99842e-05	7.58759e-05	4.78224e-05	0.000104367
k__Bacteria;p__Firmicutes;c__Bacilli;o__Gemellales;Other;Other	1.4096e-05	2.94008e-06	1.283e-05	2.2867e-06	1.59e-06	1.74161e-06	5.91406e-06
k__Bacteria;p__Firmicutes;c__Bacilli;o__Lactobacillales;[f__Carnobacteriaceae/f__Aerococcaceae];Other	0	0	0	0	0	6.94002e-08	1.15667e-08
k__Bacteria;p__Firmicutes;c__Bacilli;o__Lactobacillales;[f__Carnobacteriaceae/f__Enterococcaceae];Other	4.23e-07	0	0	0	0	0	7.05e-08
k__Bacteria;p__Firmicutes;c__Bacilli;o__Lactobacillales;[f__Lactobacillaceae/f__Streptococcaceae];Other	2.25e-07	1.25004e-06	4.28e-07	1.623e-07	0	3.88001e-07	4.0889e-07
k__Bacteria;p__Firmicutes;c__Bacilli;o__Lactobacillales;f__Aerococcaceae;g__Abiotrophia	5.2505e-06	1.67338e-05	4.562e-06	4.73303e-06	5.34899e-06	2.10491e-06	6.45554e-06
k__Bacteria;p__Firmicutes;c__Bacilli;o__Lactobacillales;f__Aerococcaceae;g__Aerococcus	8.24999e-07	1.03003e-07	0	1.366e-07	0	1.93001e-07	2.09601e-07
k__Bacteria;p__Firmicutes;c__Bacilli;o__Lactobacillales;f__Aerococcaceae;g__Alloiococcus	0	9.20027e-08	0	9.96701e-08	0	1.76001e-08	3.48788e-08
k__Bacteria;p__Firmicutes;c__Bacilli;o__Lactobacillales;f__Aerococcaceae;g__Facklamia	3.56e-07	5.43016e-07	5.28e-07	1.3918e-06	0	6.41902e-07	5.76787e-07
k__Bacteria;p__Firmicutes;c__Bacilli;o__Lactobacillales;f__Aerococcaceae;Other	4.14e-05	4.46013e-05	9.76e-05	1.92707e-05	4.77999e-05	3.01081e-05	4.67967e-05
k__Bacteria;p__Firmicutes;c__Bacilli;o__Lactobacillales;f__Carnobacteriaceae;g__Carnobacterium	6.21e-07	3.4501e-07	1.349e-06	1.5051e-06	5.02999e-07	3.95001e-07	7.86352e-07
k__Bacteria;p__Firmicutes;c__Bacilli;o__Lactobacillales;f__Carnobacteriaceae;g__Granulicatella	7.71284e-05	0.000191583	0.000256699	3.75993e-05	8.03719e-05	5.09083e-05	0.000115715
k__Bacteria;p__Firmicutes;c__Bacilli;o__Lactobacillales;f__Carnobacteriaceae;g__Trichococcus	2.17e-07	0	0	0	0	0	3.61666e-08
k__Bacteria;p__Firmicutes;c__Bacilli;o__Lactobacillales;f__Carnobacteriaceae;Other	8.59999e-07	1.96006e-06	4.02e-07	2.79e-07	4.63999e-06	5.27002e-07	1.44468e-06
k__Bacteria;p__Firmicutes;c__Bacilli;o__Lactobacillales;f__Enterococcaceae;g__Enterococcus	0.00511702	0.00155398	0.00326237	0.000328306	0.000465583	0.000286749	0.00183567
k__Bacteria;p__Firmicutes;c__Bacilli;o__Lactobacillales;f__Enterococcaceae;g__Melissococcus	1.16e-06	0	0	3.82e-08	0	1.96001e-08	2.02967e-07
k__Bacteria;p__Firmicutes;c__Bacilli;o__Lactobacillales;f__Enterococcaceae;g__Tetragenococcus	3.74e-07	0	1.844e-06	3.966e-07	0	1.61201e-07	4.62633e-07
k__Bacteria;p__Firmicutes;c__Bacilli;o__Lactobacillales;f__Enterococcaceae;g__Vagococcus	4.34e-07	1.04003e-06	0	1.1553e-07	1.459e-06	2.91001e-08	5.12943e-07
k__Bacteria;p__Firmicutes;c__Bacilli;o__Lactobacillales;f__Enterococcaceae;Other	6.205e-05	1.75005e-05	2.7226e-05	6.29141e-06	7.24999e-07	6.86002e-06	2.01088e-05
k__Bacteria;p__Firmicutes;c__Bacilli;o__Lactobacillales;f__Lactobacillaceae;g__Lactobacillus	0.00630538	0.0077316	0.0346872	0.00224264	0.0105352	0.00192021	0.0105704
k__Bacteria;p__Firmicutes;c__Bacilli;o__Lactobacillales;f__Lactobacillaceae;g__Pediococcus	2.1318e-05	0.000450604	9.9467e-05	3.84582e-05	1.989e-05	3.77361e-05	0.000111246
k__Bacteria;p__Firmicutes;c__Bacilli;o__Lactobacillales;f__Lactobacillaceae;Other	6.364e-06	8.35624e-06	0.000118982	4.7357e-06	1.7798e-05	2.89291e-06	2.65215e-05
k__Bacteria;p__Firmicutes;c__Bacilli;o__Lactobacillales;f__Leuconostocaceae;g__Fructobacillus	8.05e-07	3.5001e-07	0	7.37701e-07	0	3.69901e-07	3.77102e-07
k__Bacteria;p__Firmicutes;c__Bacilli;o__Lactobacillales;f__Leuconostocaceae;g__Leuconostoc	0.000213931	0.00031013	0.000136493	0.00019609	0.000142773	9.92865e-05	0.000183117
k__Bacteria;p__Firmicutes;c__Bacilli;o__Lactobacillales;f__Leuconostocaceae;g__Oenococcus	0	0	0	0	7.82999e-07	0	1.305e-07
k__Bacteria;p__Firmicutes;c__Bacilli;o__Lactobacillales;f__Leuconostocaceae;g__Weissella	6.00615e-05	0.000158113	4.8066e-05	5.7489e-05	6.99599e-06	3.53291e-06	5.57097e-05
k__Bacteria;p__Firmicutes;c__Bacilli;o__Lactobacillales;f__Leuconostocaceae;Other	1.881e-06	0	2.438e-06	8.66341e-07	9.48999e-07	1.45001e-07	1.04656e-06
k__Bacteria;p__Firmicutes;c__Bacilli;o__Lactobacillales;f__Streptococcaceae;[g__Streptococcus/g__Lactococcus]	7.15e-06	1.15003e-05	2.25e-06	1.28e-05	2.65e-06	9.90004e-06	7.7084e-06
k__Bacteria;p__Firmicutes;c__Bacilli;o__Lactobacillales;f__Streptococcaceae;g__Lactococcus	0.000410211	0.00155437	0.000159493	0.000581141	0.00038943	0.000436928	0.000588596
k__Bacteria;p__Firmicutes;c__Bacilli;o__Lactobacillales;f__Streptococcaceae;g__Streptococcus	0.0472704	0.0236266	0.0744934	0.0163713	0.0586322	0.0127569	0.0388585
k__Bacteria;p__Firmicutes;c__Bacilli;o__Lactobacillales;f__Streptococcaceae;Other	1.807e-05	1.76385e-05	2.8536e-05	2.6669e-06	2.0981e-05	1.79311e-06	1.49476e-05
k__Bacteria;p__Firmicutes;c__Bacilli;o__Lactobacillales;Other;Other	0.00101251	0.000422806	0.000825147	0.00027438	0.0023782	0.000194166	0.000851202
k__Bacteria;p__Firmicutes;c__Bacilli;o__Turicibacterales;f__Turicibacteraceae;g__Turicibacter	0.00381436	0.00416008	0.00211646	0.00387621	0.00207391	0.00193215	0.00299553
k__Bacteria;p__Firmicutes;c__Clostridia;o__Clostridiales;[f__[Mogibacteriaceae]/f__[Acidaminobacteraceae]];Other	2.17e-07	8.92026e-07	0	0	0	0	1.84838e-07
k__Bacteria;p__Firmicutes;c__Clostridia;o__Clostridiales;[f__Christensenellaceae/f__Ruminococcaceae];Other	3.62e-05	2.26007e-05	6.41e-06	4.42e-05	3.93999e-05	3.21001e-05	3.01518e-05
k__Bacteria;p__Firmicutes;c__Clostridia;o__Clostridiales;[f__Clostridiaceae/f__[Mogibacteriaceae]];Other	0.00142255	0.000903709	0.00110787	0.000939238	0.00114401	0.000697539	0.00103582
k__Bacteria;p__Firmicutes;c__Clostridia;o__Clostridiales;[f__Clostridiaceae/f__Lachnospiraceae];Other	8.12379e-05	2.79538e-05	1.7e-05	0.000135413	5.88769e-05	7.62663e-05	6.61247e-05
k__Bacteria;p__Firmicutes;c__Clostridia;o__Clostridiales;[f__Clostridiaceae/f__Peptostreptococcaceae];Other	4.615e-05	0.000120733	3.763e-05	3.945e-05	2.8603e-05	2.38501e-05	4.94028e-05
k__Bacteria;p__Firmicutes;c__Clostridia;o__Clostridiales;[f__Clostridiaceae/f__Veillonellaceae];Other	0.000748452	0.00100019	0.000951066	0.00142123	0.000314536	0.000720323	0.000859299
k__Bacteria;p__Firmicutes;c__Clostridia;o__Clostridiales;[f__Ruminococcaceae/f__[Mogibacteriaceae]];Other	0.0011006	0.000506471	0.000269089	0.00135719	0.000864945	0.00112681	0.000870852
k__Bacteria;p__Firmicutes;c__Clostridia;o__Clostridiales;[f__Ruminococcaceae/f__Clostridiaceae];Other	0.000228419	0.000229814	0.000180066	0.000315286	0.000227985	0.000531071	0.00028544
k__Bacteria;p__Firmicutes;c__Clostridia;o__Clostridiales;[f__Ruminococcaceae/f__Clostridiaceae/f__Veillonellaceae];Other	0	0	0	8.32001e-08	0	7.67003e-08	2.66501e-08
k__Bacteria;p__Firmicutes;c__Clostridia;o__Clostridiales;[f__Ruminococcaceae/f__Lachnospiraceae];Other	0.00516705	0.00557023	0.0045533	0.0051034	0.00621515	0.00656204	0.00552853
k__Bacteria;p__Firmicutes;c__Clostridia;o__Clostridiales;[f__Ruminococcaceae/f__Veillonellaceae];Other	2.25e-05	4.38013e-05	0.000395578	2.99e-05	1.93e-05	2.70001e-05	8.96799e-05
k__Bacteria;p__Firmicutes;c__Clostridia;o__Clostridiales;f__Christensenellaceae;g__Christensenella	2.94e-05	1.09503e-05	8.5e-06	3.062e-05	3.47999e-05	4.05001e-05	2.57951e-05
k__Bacteria;p__Firmicutes;c__Clostridia;o__Clostridiales;f__Christensenellaceae;Other	0.00345778	0.00139394	0.000527202	0.00418352	0.00189682	0.00291596	0.00239587
k__Bacteria;p__Firmicutes;c__Clostridia;o__Clostridiales;f__Clostridiaceae;g__02d06	0.000259193	0.000144455	8.08e-05	0.000247782	0.000139859	0.000128898	0.000166831
k__Bacteria;p__Firmicutes;c__Clostridia;o__Clostridiales;f__Clostridiaceae;g__Clostridium	0.009003	0.0059107	0.00671429	0.00662724	0.00524042	0.00497402	0.00641161
k__Bacteria;p__Firmicutes;c__Clostridia;o__Clostridiales;f__Clostridiaceae;g__Sarcina	0.000137308	8.01178e-05	4.6096e-05	0.000290266	0.000788544	8.46362e-05	0.000237828
k__Bacteria;p__Firmicutes;c__Clostridia;o__Clostridiales;f__Clostridiaceae;g__SMB53	0.00214747	0.00210918	0.0011729	0.00220705	0.00126032	0.00117588	0.0016788
k__Bacteria;p__Firmicutes;c__Clostridia;o__Clostridiales;f__Clostridiaceae;g__Thermoanaerobacterium	0	2.68008e-07	0	0	0	0	4.4668e-08
k__Bacteria;p__Firmicutes;c__Clostridia;o__Clostridiales;f__Clostridiaceae;Other	0.0250648	0.0174974	0.00815457	0.0303601	0.0111951	0.0115755	0.0173079
k__Bacteria;p__Firmicutes;c__Clostridia;o__Clostridiales;f__Dehalobacteriaceae;g__Dehalobacterium	0.000103521	2.88204e-05	9.853e-06	9.83481e-05	3.98689e-05	7.96744e-05	6.00143e-05
k__Bacteria;p__Firmicutes;c__Clostridia;o__Clostridiales;f__Dehalobacteriaceae;Other	1.376e-05	4.84014e-07	0	1.84329e-05	3.274e-06	1.1562e-05	7.91883e-06
k__Bacteria;p__Firmicutes;c__Clostridia;o__Clostridiales;f__EtOH8;Other	3.54e-06	6.25018e-07	3.07e-06	6.15001e-06	7.21999e-06	4.37002e-06	4.1625e-06
k__Bacteria;p__Firmicutes;c__Clostridia;o__Clostridiales;f__Eubacteriaceae;g__Anaerofustis	6.286e-05	9.90049e-05	0.0001126	5.11571e-05	9.18029e-05	8.14173e-05	8.31403e-05
k__Bacteria;p__Firmicutes;c__Clostridia;o__Clostridiales;f__Eubacteriaceae;g__Pseudoramibacter_Eubacterium	0.000192732	3.71818e-05	0.000698116	3.31551e-05	4.76109e-05	4.9996e-05	0.000176465
k__Bacteria;p__Firmicutes;c__Clostridia;o__Clostridiales;f__Eubacteriaceae;Other	0	0	0	1.9e-08	0	1.49001e-07	2.80001e-08
k__Bacteria;p__Firmicutes;c__Clostridia;o__Clostridiales;f__Lachnospiraceae;[g__Blautia/g__Anaerostipes]	0.00017917	0.000181515	6.34e-05	0.00018328	0.000241889	0.000239154	0.000181401
k__Bacteria;p__Firmicutes;c__Clostridia;o__Clostridiales;f__Lachnospiraceae;[g__Dorea/g__[Ruminococcus]]	9.47099e-05	0.000117444	0.000139687	9.16801e-05	0.000138771	0.000107561	0.000114976
k__Bacteria;p__Firmicutes;c__Clostridia;o__Clostridiales;f__Lachnospiraceae;[g__Dorea/g__Coprococcus]	5.4052e-05	8.77645e-05	8.2579e-05	5.01091e-05	8.30829e-05	3.91591e-05	6.61244e-05
k__Bacteria;p__Firmicutes;c__Clostridia;o__Clostridiales;f__Lachnospiraceae;[g__Dorea/g__Roseburia]	9.59999e-07	2.33007e-07	2.07e-07	8.32001e-07	4.12999e-07	2.00001e-06	7.74169e-07
k__Bacteria;p__Firmicutes;c__Clostridia;o__Clostridiales;f__Lachnospiraceae;g__Anaerostipes	0.00137245	0.00147687	0.00133226	0.00170748	0.0017569	0.00182976	0.00157929
k__Bacteria;p__Firmicutes;c__Clostridia;o__Clostridiales;f__Lachnospiraceae;g__Bacteroides	0	0	0	3.52e-08	0	1.01e-07	2.27001e-08
k__Bacteria;p__Firmicutes;c__Clostridia;o__Clostridiales;f__Lachnospiraceae;g__Blautia	0.0857791	0.0851924	0.0835287	0.0763251	0.107206	0.10168	0.0899518
k__Bacteria;p__Firmicutes;c__Clostridia;o__Clostridiales;f__Lachnospiraceae;g__Butyrivibrio	0.00061269	0.000353785	3.262e-06	0.000495979	0.000153544	0.00073073	0.000391665
k__Bacteria;p__Firmicutes;c__Clostridia;o__Clostridiales;f__Lachnospiraceae;g__Catonella	0	0	0	5.65001e-08	0	0	9.41668e-09
k__Bacteria;p__Firmicutes;c__Clostridia;o__Clostridiales;f__Lachnospiraceae;g__Clostridium	0.00028184	0.00127567	0.0015057	0.000224361	0.000267802	0.000206973	0.000627057
k__Bacteria;p__Firmicutes;c__Clostridia;o__Clostridiales;f__Lachnospiraceae;g__Coprococcus	0.0182528	0.0134119	0.0125411	0.0196853	0.0186154	0.0225246	0.0175052
k__Bacteria;p__Firmicutes;c__Clostridia;o__Clostridiales;f__Lachnospiraceae;g__Desulfotomaculum	0	0	0	6.21001e-09	0	0	1.035e-09
k__Bacteria;p__Firmicutes;c__Clostridia;o__Clostridiales;f__Lachnospiraceae;g__Dorea	0.0149562	0.0220814	0.0223299	0.0153505	0.0164395	0.0166448	0.0179671
k__Bacteria;p__Firmicutes;c__Clostridia;o__Clostridiales;f__Lachnospiraceae;g__Epulopiscium	6.36621e-05	0.000234017	0.000109733	0.000112607	0.000138818	9.64595e-05	0.000125883
k__Bacteria;p__Firmicutes;c__Clostridia;o__Clostridiales;f__Lachnospiraceae;g__Hespellia	3.92e-07	3.3101e-07	3.31e-07	2.46e-07	0	3.24001e-07	2.70668e-07
k__Bacteria;p__Firmicutes;c__Clostridia;o__Clostridiales;f__Lachnospiraceae;g__Lachnoanaerobaculum	0	5.95017e-07	0	1.77e-08	0	3.05001e-08	1.07203e-07
k__Bacteria;p__Firmicutes;c__Clostridia;o__Clostridiales;f__Lachnospiraceae;g__Lachnobacterium	8.48999e-05	0.000120756	2.9544e-05	7.56256e-05	2.1717e-05	7.09441e-05	6.72478e-05
k__Bacteria;p__Firmicutes;c__Clostridia;o__Clostridiales;f__Lachnospiraceae;g__Lachnospira	0.00201661	0.00539696	0.00374747	0.00239895	0.00228415	0.00320034	0.00317408
k__Bacteria;p__Firmicutes;c__Clostridia;o__Clostridiales;f__Lachnospiraceae;g__Moryella	3.3786e-06	9.00816e-06	2.448e-06	1.47355e-06	1.858e-06	2.58331e-06	3.45827e-06
k__Bacteria;p__Firmicutes;c__Clostridia;o__Clostridiales;f__Lachnospiraceae;g__Oribacterium	8.71299e-06	1.14528e-05	1.0252e-05	2.75778e-06	9.98579e-06	3.67559e-06	7.80616e-06
k__Bacteria;p__Firmicutes;c__Clostridia;o__Clostridiales;f__Lachnospiraceae;g__Robinsoniella	0	1.40794e-05	1.59e-06	3.52e-07	5.36399e-06	8.82003e-07	3.71123e-06
k__Bacteria;p__Firmicutes;c__Clostridia;o__Clostridiales;f__Lachnospiraceae;g__Roseburia	0.00530696	0.00994048	0.0124552	0.00566975	0.00763842	0.00677831	0.00796486
k__Bacteria;p__Firmicutes;c__Clostridia;o__Clostridiales;f__Lachnospiraceae;g__Ruminococcus	0.0117524	0.0293489	0.0351074	0.0106087	0.015043	0.0166477	0.0197513
k__Bacteria;p__Firmicutes;c__Clostridia;o__Clostridiales;f__Lachnospiraceae;g__Shuttleworthia	1.29e-07	8.59025e-07	3.52e-07	5.36001e-08	1.01e-06	6.88202e-07	5.15304e-07
k__Bacteria;p__Firmicutes;c__Clostridia;o__Clostridiales;f__Lachnospiraceae;Other	0.109856	0.122724	0.119218	0.107931	0.135815	0.136999	0.12209
k__Bacteria;p__Firmicutes;c__Clostridia;o__Clostridiales;f__Mogibacteriaceae;g__Anaerovorax	4.5e-07	0	0	2.714e-07	0	4.25902e-07	1.91217e-07
k__Bacteria;p__Firmicutes;c__Clostridia;o__Clostridiales;f__Mogibacteriaceae;g__Mogibacterium	0.00042747	0.000153836	0.000452916	0.000288289	0.000408491	0.000181925	0.000318821
k__Bacteria;p__Firmicutes;c__Clostridia;o__Clostridiales;f__Mogibacteriaceae;Other	0.00175502	0.00079596	0.0015781	0.00167524	0.00103854	0.00124795	0.00134847
k__Bacteria;p__Firmicutes;c__Clostridia;o__Clostridiales;f__Peptococcaceae;g__Desulfitobacter	0	0	0	2.51e-08	0	0	4.18334e-09
k__Bacteria;p__Firmicutes;c__Clostridia;o__Clostridiales;f__Peptococcaceae;g__Desulfosporosinus	0	0	0	0	0	6.18002e-08	1.03e-08
k__Bacteria;p__Firmicutes;c__Clostridia;o__Clostridiales;f__Peptococcaceae;g__Peptococcus	0.00102456	0.000505103	0.000674898	0.00128586	0.00182015	0.000753819	0.00101073
k__Bacteria;p__Firmicutes;c__Clostridia;o__Clostridiales;f__Peptococcaceae;g__rc4-4	5.745e-05	7.48632e-05	7.9044e-05	3.96438e-05	4.19689e-05	5.15012e-05	5.74118e-05
k__Bacteria;p__Firmicutes;c__Clostridia;o__Clostridiales;f__Peptococcaceae;Other	4.5055e-05	4.7493e-05	1.6977e-05	4.97771e-05	2.57958e-05	4.81136e-05	3.88686e-05
k__Bacteria;p__Firmicutes;c__Clostridia;o__Clostridiales;f__Peptostreptococcaceae;g__Clostridium	0.0107297	0.0117436	0.0125185	0.0108238	0.00604929	0.00620858	0.00967892
k__Bacteria;p__Firmicutes;c__Clostridia;o__Clostridiales;f__Peptostreptococcaceae;g__Peptostreptococcus	1.4983e-05	0.000282543	4.7526e-05	2.54699e-05	7.06999e-06	1.0873e-05	6.47442e-05
k__Bacteria;p__Firmicutes;c__Clostridia;o__Clostridiales;f__Peptostreptococcaceae;Other	0.0218935	0.0180737	0.0102295	0.0267195	0.015357	0.0112849	0.0172597
k__Bacteria;p__Firmicutes;c__Clostridia;o__Clostridiales;f__Ruminococcaceae;[g__Gemmiger/g__Subdoligranulum]	9.54999e-06	5.46016e-06	1.74e-06	2.43e-05	6.98999e-06	2.10001e-05	1.15067e-05
k__Bacteria;p__Firmicutes;c__Clostridia;o__Clostridiales;f__Ruminococcaceae;[g__Ruminococcus/g__Oscillospira]	0.000801945	0.000304769	0.000775831	0.000860582	1.09e-05	0.0013361	0.000681688
k__Bacteria;p__Firmicutes;c__Clostridia;o__Clostridiales;f__Ruminococcaceae;g__Anaerotruncus	5.4486e-05	1.36107e-05	1.0808e-05	3.47023e-05	2.421e-05	2.02083e-05	2.63375e-05
k__Bacteria;p__Firmicutes;c__Clostridia;o__Clostridiales;f__Ruminococcaceae;g__Clostridium	6.58e-06	1.27004e-05	3.61e-05	3.7078e-06	1.3529e-05	5.60002e-06	1.30362e-05
k__Bacteria;p__Firmicutes;c__Clostridia;o__Clostridiales;f__Ruminococcaceae;g__Faecalibacterium	0.0612639	0.0590629	0.0496782	0.0685949	0.0523764	0.0588787	0.0583092
k__Bacteria;p__Firmicutes;c__Clostridia;o__Clostridiales;f__Ruminococcaceae;g__Gemmiger	6.5369e-05	4.18492e-05	3.5889e-05	7.12661e-05	4.63569e-05	6.35982e-05	5.40547e-05
k__Bacteria;p__Firmicutes;c__Clostridia;o__Clostridiales;f__Ruminococcaceae;g__Oscillospira	0.00583381	0.00776014	0.00733029	0.006034	0.00455077	0.00516428	0.00611222
k__Bacteria;p__Firmicutes;c__Clostridia;o__Clostridiales;f__Ruminococcaceae;g__Ruminococcus	0.0533213	0.0430221	0.032759	0.0576296	0.0651812	0.066634	0.0530912
k__Bacteria;p__Firmicutes;c__Clostridia;o__Clostridiales;f__Ruminococcaceae;Other	0.109323	0.0801591	0.063328	0.119618	0.0853466	0.114644	0.0954033
k__Bacteria;p__Firmicutes;c__Clostridia;o__Clostridiales;f__Syntrophomonadaceae;g__Syntrophomonas	4.5e-07	1.05023e-06	0	1.729e-07	0	1.01e-07	2.95688e-07
k__Bacteria;p__Firmicutes;c__Clostridia;o__Clostridiales;f__Tisierellaceae;g__Peptoniphilus	0	0	0	1.62e-08	0	0	2.7e-09
k__Bacteria;p__Firmicutes;c__Clostridia;o__Clostridiales;f__Tissierellaceae;g__1-68	3.6303e-06	2.49717e-06	2.653e-06	5.03979e-06	0	7.72623e-07	2.43215e-06
k__Bacteria;p__Firmicutes;c__Clostridia;o__Clostridiales;f__Tissierellaceae;g__Anaerococcus	3.94658e-05	0.000569937	0.000429268	4.68464e-05	1.3471e-05	1.08037e-05	0.000184965
k__Bacteria;p__Firmicutes;c__Clostridia;o__Clostridiales;f__Tissierellaceae;g__Finegoldia	3.09344e-05	0.000151029	8.0549e-05	3.2144e-05	1.9699e-05	1.31386e-05	5.45823e-05
k__Bacteria;p__Firmicutes;c__Clostridia;o__Clostridiales;f__Tissierellaceae;g__Gallicola	6.35e-07	3.3928e-06	0	1.1629e-06	5.34999e-07	6.05002e-07	1.05512e-06
k__Bacteria;p__Firmicutes;c__Clostridia;o__Clostridiales;f__Tissierellaceae;g__Helcococcus	0	0	0	7.19601e-08	0	0	1.19933e-08
k__Bacteria;p__Firmicutes;c__Clostridia;o__Clostridiales;f__Tissierellaceae;g__Parvimonas	2.37752e-05	9.37713e-05	1.4049e-05	2.38195e-05	8.49999e-06	2.02132e-05	3.0688e-05
k__Bacteria;p__Firmicutes;c__Clostridia;o__Clostridiales;f__Tissierellaceae;g__Peptoniphilus	4.72906e-05	0.000319874	0.000129487	4.60465e-05	2.29478e-05	1.70977e-05	9.71239e-05
k__Bacteria;p__Firmicutes;c__Clostridia;o__Clostridiales;f__Tissierellaceae;g__Peptoniphilusria	0	3.24009e-07	0	1.5e-07	0	6.86002e-08	9.0435e-08
k__Bacteria;p__Firmicutes;c__Clostridia;o__Clostridiales;f__Tissierellaceae;g__ph2	4.588e-06	1.02863e-05	8.1e-07	9.14874e-06	8.21499e-06	1.74757e-06	5.79926e-06
k__Bacteria;p__Firmicutes;c__Clostridia;o__Clostridiales;f__Tissierellaceae;g__Sedimentibacter	0	0	0	0	0	3.59001e-08	5.98335e-09
k__Bacteria;p__Firmicutes;c__Clostridia;o__Clostridiales;f__Tissierellaceae;g__Sporanaerobacter	0	0	2.27e-06	8.59001e-09	0	0	3.79765e-07
k__Bacteria;p__Firmicutes;c__Clostridia;o__Clostridiales;f__Tissierellaceae;g__WAL_1855D	1.58913e-05	2.60527e-05	3.487e-06	2.55117e-05	7.96699e-06	8.36851e-06	1.45464e-05
k__Bacteria;p__Firmicutes;c__Clostridia;o__Clostridiales;f__Tissierellaceae;Other	0	8.45024e-07	0	3.355e-07	0	2.97301e-07	2.46304e-07
k__Bacteria;p__Firmicutes;c__Clostridia;o__Clostridiales;f__Veillonellaceae;[g__Dialister/g__Veillonella]	9.87999e-07	6.18018e-06	8.69e-06	1.63e-07	0	2.79001e-07	2.7167e-06
k__Bacteria;p__Firmicutes;c__Clostridia;o__Clostridiales;f__Veillonellaceae;[g__Veillonella/g__Megasphaera]	0	0	9.94e-07	2.27e-08	0	0	1.6945e-07
k__Bacteria;p__Firmicutes;c__Clostridia;o__Clostridiales;f__Veillonellaceae;g__Acidaminococcus	0.000192177	0.00222542	0.00191884	0.000154124	9.22979e-05	0.000383782	0.000827774
k__Bacteria;p__Firmicutes;c__Clostridia;o__Clostridiales;f__Veillonellaceae;g__Anaerovibrio	0	0	0	1.74e-08	0	0	2.9e-09
k__Bacteria;p__Firmicutes;c__Clostridia;o__Clostridiales;f__Veillonellaceae;g__Dialister	0.0174323	0.0245272	0.0148388	0.0230613	0.0129194	0.0173029	0.018347
k__Bacteria;p__Firmicutes;c__Clostridia;o__Clostridiales;f__Veillonellaceae;g__Megamonas	0.000498929	0.00255018	0.00627247	0.000709645	0.00025084	0.000725041	0.00183452
k__Bacteria;p__Firmicutes;c__Clostridia;o__Clostridiales;f__Veillonellaceae;g__Megasphaera	0.00260382	0.00606916	0.00900141	0.000988188	0.00180304	0.00130325	0.00362814
k__Bacteria;p__Firmicutes;c__Clostridia;o__Clostridiales;f__Veillonellaceae;g__Mitsuokella	0.000196407	0.000541807	5.893e-05	0.000245178	0.000174205	0.000249557	0.000244347
k__Bacteria;p__Firmicutes;c__Clostridia;o__Clostridiales;f__Veillonellaceae;g__Phascolarctobacterium	0.00227567	0.00211093	0.0036408	0.00228817	0.00231782	0.00193593	0.00242822
k__Bacteria;p__Firmicutes;c__Clostridia;o__Clostridiales;f__Veillonellaceae;g__Selenomonas	0	2.00266e-06	5.214e-06	4.6756e-07	5.29999e-07	2.68201e-07	1.41374e-06
k__Bacteria;p__Firmicutes;c__Clostridia;o__Clostridiales;f__Veillonellaceae;g__Succiniclasticum	2.2998e-05	0.00035917	1.57e-05	0.000260971	0.000111291	0.000324017	0.000182358
k__Bacteria;p__Firmicutes;c__Clostridia;o__Clostridiales;f__Veillonellaceae;g__Veillonella	0.000946168	0.00442076	0.00790268	0.000246803	0.000500592	0.000267696	0.00238078
k__Bacteria;p__Firmicutes;c__Clostridia;o__Clostridiales;f__Veillonellaceae;Other	0.000601989	0.000748385	0.000696828	0.000646234	0.000379001	0.000637893	0.000618388
k__Bacteria;p__Firmicutes;c__Clostridia;o__Clostridiales;Other;Other	0.0678441	0.0519541	0.0513594	0.07695	0.0685801	0.0796297	0.0660529
k__Bacteria;p__Firmicutes;c__Clostridia;o__OPB54;Other;Other	0	0	0	0	0	3.52001e-09	5.86669e-10
k__Bacteria;p__Firmicutes;c__Clostridia;o__SHA-98;Other;Other	2.313e-05	1.44134e-05	4.05e-06	2.94517e-05	1.564e-05	1.57306e-05	1.70693e-05
k__Bacteria;p__Firmicutes;c__Clostridia;Other;Other;Other	0.000132336	7.31701e-05	3.226e-05	0.00013044	3.88569e-05	5.67432e-05	7.73011e-05
k__Bacteria;p__Firmicutes;c__Erysipelotrichi;o__Erysipelotrichales;f__Erysipelotrichaceae;g__Allobaculum	0.000157677	2.72809e-05	0.000241546	1.01712e-05	1.8246e-05	0.000369588	0.000137418
k__Bacteria;p__Firmicutes;c__Erysipelotrichi;o__Erysipelotrichales;f__Erysipelotrichaceae;g__Bulleidia	0.000590307	0.000761841	0.000608072	0.000835609	0.0012083	0.00107189	0.000846003
k__Bacteria;p__Firmicutes;c__Erysipelotrichi;o__Erysipelotrichales;f__Erysipelotrichaceae;g__Catenibacterium	0.00530091	0.00346036	0.00265755	0.00628358	0.00443727	0.00494211	0.00451363
k__Bacteria;p__Firmicutes;c__Erysipelotrichi;o__Erysipelotrichales;f__Erysipelotrichaceae;g__cc_115	0.000729971	0.00114921	0.000735952	0.000575959	0.000309507	0.000565877	0.000677746
k__Bacteria;p__Firmicutes;c__Erysipelotrichi;o__Erysipelotrichales;f__Erysipelotrichaceae;g__Clostridium	0.000478314	0.00241194	0.00527965	0.000740255	0.000945022	0.00101384	0.0018115
k__Bacteria;p__Firmicutes;c__Erysipelotrichi;o__Erysipelotrichales;f__Erysipelotrichaceae;g__Coprobacillus	0.000614475	0.00112706	0.00176458	0.000428165	0.000814019	0.000480995	0.000871549
k__Bacteria;p__Firmicutes;c__Erysipelotrichi;o__Erysipelotrichales;f__Erysipelotrichaceae;g__Erysipelothrix	0	0	0	2.92e-08	0	0	4.86667e-09
k__Bacteria;p__Firmicutes;c__Erysipelotrichi;o__Erysipelotrichales;f__Erysipelotrichaceae;g__Eubacterium	0.0244073	0.014566	0.0166144	0.0186948	0.0232902	0.018407	0.01933
k__Bacteria;p__Firmicutes;c__Erysipelotrichi;o__Erysipelotrichales;f__Erysipelotrichaceae;g__Holdemania	0.000148371	0.000176384	0.0001643	0.000142172	0.000102908	0.000157092	0.000148538
k__Bacteria;p__Firmicutes;c__Erysipelotrichi;o__Erysipelotrichales;f__Erysipelotrichaceae;g__p-75-a5	1.966e-06	2.61008e-07	0	7.89401e-06	0	1.87001e-06	1.9985e-06
k__Bacteria;p__Firmicutes;c__Erysipelotrichi;o__Erysipelotrichales;f__Erysipelotrichaceae;g__RFN20	1.58e-06	1.08254e-05	0	1.4935e-06	0	2.78401e-06	2.78049e-06
k__Bacteria;p__Firmicutes;c__Erysipelotrichi;o__Erysipelotrichales;f__Erysipelotrichaceae;g__Sharpea	3.49e-07	2.99009e-07	0.000629868	1.06535e-06	0	3.69001e-07	0.000105325
k__Bacteria;p__Firmicutes;c__Erysipelotrichi;o__Erysipelotrichales;f__Erysipelotrichaceae;Other	0.0140729	0.0138876	0.0114232	0.0165156	0.0200865	0.0145397	0.0150876
k__Bacteria;p__Firmicutes;c__OPB54;Other;Other;Other	0	0	0	1.38e-07	0	1.63001e-07	5.01668e-08
k__Bacteria;p__Fusobacteria;c__Fusobacteriia;o__Fusobacteriales;f__Fusobacteriaceae;g__Cetobacterium	4.3158e-06	0	0	2.0878e-06	0	0	1.06727e-06
k__Bacteria;p__Fusobacteria;c__Fusobacteriia;o__Fusobacteriales;f__Fusobacteriaceae;g__Fusobacterium	9.95789e-06	0.00332656	0.0036239	1.37329e-05	8.80499e-06	3.60523e-05	0.00116984
k__Bacteria;p__Fusobacteria;c__Fusobacteriia;o__Fusobacteriales;f__Fusobacteriaceae;Other	0	0	0.000130086	8.00001e-07	0	0	2.18143e-05
k__Bacteria;p__Fusobacteria;c__Fusobacteriia;o__Fusobacteriales;f__Leptotrichiaceae;g__Leptotrichia	1.6555e-06	5.61716e-06	9.473e-06	4.5718e-07	2.004e-06	7.17003e-07	3.32064e-06
k__Bacteria;p__Fusobacteria;c__Fusobacteriia;o__Fusobacteriales;f__Leptotrichiaceae;g__Sneathia	2.83e-06	0	0	7.19001e-07	0	4.24502e-07	6.6225e-07
k__Bacteria;p__Lentisphaerae;c__Lentisphaeria;o__Victivallales;f__Victivallaceae;g__Victivallis	2.5e-06	3.3101e-06	6.7e-05	4.97e-06	2.54e-06	3.01001e-06	1.38883e-05
k__Bacteria;p__Lentisphaerae;c__Lentisphaeria;o__Victivallales;f__Victivallaceae;Other	2.6222e-05	8.11623e-06	4.59e-06	2.3342e-05	2.146e-06	4.85703e-05	1.88311e-05
k__Bacteria;p__Lentisphaerae;c__Lentisphaeria;o__Z20;f__R4-45B;Other	0	0	0	3.013e-07	0	2.79001e-08	5.48667e-08
k__Bacteria;p__Planctomycetes;c__Planctomycetia;o__Pirellulales;f__Pirellulaceae;Other	0	0	0	1.74e-08	0	0	2.9e-09
k__Bacteria;p__Proteobacteria;c__Alphaproteobacteria;o__Caulobacterales;f__Caulobacteraceae;g__Brevundimonas	4.13e-07	0	0	1.8e-08	0	0	7.18333e-08
k__Bacteria;p__Proteobacteria;c__Alphaproteobacteria;o__Caulobacterales;f__Caulobacteraceae;g__Phenylobacterium	1.03e-07	0	0	0	0	0	1.71667e-08
k__Bacteria;p__Proteobacteria;c__Alphaproteobacteria;o__Caulobacterales;f__Caulobacteraceae;Other	0	2.68708e-07	8.26e-07	2.67e-08	5.34999e-07	0	2.76068e-07
k__Bacteria;p__Proteobacteria;c__Alphaproteobacteria;o__RF32;Other;Other	0.000422756	0.000878362	0.000950281	0.000383666	8.34899e-05	0.000324729	0.000507214
k__Bacteria;p__Proteobacteria;c__Alphaproteobacteria;o__Rhizobiales;f__Aurantimonadaceae;g__Aurantimonas	0	0	0	1.36e-08	0	0	2.26667e-09
k__Bacteria;p__Proteobacteria;c__Alphaproteobacteria;o__Rhizobiales;f__Aurantimonadaceae;Other	0	0	0	1.6e-08	0	0	2.66667e-09
k__Bacteria;p__Proteobacteria;c__Alphaproteobacteria;o__Rhizobiales;f__Bradyrhizobiaceae;g__Bradyrhizobium	0	0	0	1.473e-07	0	0	2.455e-08
k__Bacteria;p__Proteobacteria;c__Alphaproteobacteria;o__Rhizobiales;f__Bradyrhizobiaceae;Other	0	0	0	8.34001e-09	0	0	1.39e-09
k__Bacteria;p__Proteobacteria;c__Alphaproteobacteria;o__Rhizobiales;f__Brucellaceae;g__Ochrobactrum	0	0	0	0	1.07e-06	0	1.78333e-07
k__Bacteria;p__Proteobacteria;c__Alphaproteobacteria;o__Rhizobiales;f__Hyphomicrobiaceae;g__Hyphomicrobium	0	1.17003e-07	0	0	0	0	1.95006e-08
k__Bacteria;p__Proteobacteria;c__Alphaproteobacteria;o__Rhizobiales;f__Methylobacteriaceae;g__Magnetospirillum	0	0	0	0	0	9.14003e-08	1.52334e-08
k__Bacteria;p__Proteobacteria;c__Alphaproteobacteria;o__Rhizobiales;f__Methylobacteriaceae;g__Methylobacterium	2.06e-07	2.06006e-07	0	1.6499e-07	3.054e-06	9.73003e-07	7.67332e-07
k__Bacteria;p__Proteobacteria;c__Alphaproteobacteria;o__Rhizobiales;f__Methylobacteriaceae;Other	0	1.78305e-07	0	0	0	0	2.97175e-08
k__Bacteria;p__Proteobacteria;c__Alphaproteobacteria;o__Rhizobiales;f__Rhizobiaceae;g__Agrobacterium	1.17e-07	6.8702e-08	2.02e-06	4.06e-08	0	3.22001e-08	3.7975e-07
k__Bacteria;p__Proteobacteria;c__Alphaproteobacteria;o__Rhizobiales;f__Rhizobiaceae;Other	0	0	0	0	0	1.83001e-07	3.05001e-08
k__Bacteria;p__Proteobacteria;c__Alphaproteobacteria;o__Rhizobiales;Other;Other	1.03e-07	0	0	9.80601e-08	0	0	3.351e-08
k__Bacteria;p__Proteobacteria;c__Alphaproteobacteria;o__Rhodobacterales;f__Rhodobacteraceae;g__Paracoccus	0	7.26021e-07	0	6.03001e-08	0	0	1.31054e-07
k__Bacteria;p__Proteobacteria;c__Alphaproteobacteria;o__Rhodospirillales;f__Acetobacteraceae;g__Acidocella	0	1.03003e-07	0	0	0	0	1.71672e-08
k__Bacteria;p__Proteobacteria;c__Alphaproteobacteria;o__Rhodospirillales;f__Acetobacteraceae;g__Roseomonas	0	0	0	2.21e-08	0	0	3.68334e-09
k__Bacteria;p__Proteobacteria;c__Alphaproteobacteria;o__Rhodospirillales;f__Acetobacteraceae;Other	0	0	0	4.05e-08	0	0	6.75001e-09
k__Bacteria;p__Proteobacteria;c__Alphaproteobacteria;o__Rhodospirillales;Other;Other	0	0	2.69e-07	0	0	0	4.48333e-08
k__Bacteria;p__Proteobacteria;c__Alphaproteobacteria;o__Rickettsiales;f__mitochondria;[g__Carludovica/g__Croomia/g__Podophyllum/g__Pleea]	0	0	0	3.48e-08	0	0	5.80001e-09
k__Bacteria;p__Proteobacteria;c__Alphaproteobacteria;o__Rickettsiales;f__mitochondria;[g__Cocculus/g__Atherosperma/g__Cinnamomum/g__Sarcandra/g__Hedyosmum/g__Chloranthus/g__Myristica/g__Degeneria]	0	0	0	6.93001e-08	0	0	1.155e-08
k__Bacteria;p__Proteobacteria;c__Alphaproteobacteria;o__Rickettsiales;f__mitochondria;[g__Lotus/g__Millettia]	0	1.17003e-06	3.88e-06	1.2e-06	0	0	1.04167e-06
k__Bacteria;p__Proteobacteria;c__Alphaproteobacteria;o__Rickettsiales;f__mitochondria;[g__Zea/g__Oryza]	8.82999e-08	5.97017e-06	4.3e-06	1.54e-06	0	5.37002e-07	2.07258e-06
k__Bacteria;p__Proteobacteria;c__Alphaproteobacteria;o__Rickettsiales;f__mitochondria;g__Annona	0	0	1.16e-07	0	0	0	1.93333e-08
k__Bacteria;p__Proteobacteria;c__Alphaproteobacteria;o__Rickettsiales;f__mitochondria;g__Aristolochia	0	0	6.61e-07	9.80001e-08	0	0	1.265e-07
k__Bacteria;p__Proteobacteria;c__Alphaproteobacteria;o__Rickettsiales;f__mitochondria;g__Beta	0	0	0	5.37001e-08	0	0	8.95001e-09
k__Bacteria;p__Proteobacteria;c__Alphaproteobacteria;o__Rickettsiales;f__mitochondria;g__Canella	0	2.97009e-07	0	0	0	0	4.95014e-08
k__Bacteria;p__Proteobacteria;c__Alphaproteobacteria;o__Rickettsiales;f__mitochondria;g__Carica	0	0	0	1.27e-08	0	0	2.11667e-09
k__Bacteria;p__Proteobacteria;c__Alphaproteobacteria;o__Rickettsiales;f__mitochondria;g__Citrullus	0	0	0	1.91e-08	0	0	3.18334e-09
k__Bacteria;p__Proteobacteria;c__Alphaproteobacteria;o__Rickettsiales;f__mitochondria;g__Cucurbita	0	2.08006e-06	0	7.07001e-07	0	0	4.6451e-07
k__Bacteria;p__Proteobacteria;c__Alphaproteobacteria;o__Rickettsiales;f__mitochondria;g__Galbulimima	0	2.40007e-07	0	9.45001e-08	0	4.58002e-08	6.33845e-08
k__Bacteria;p__Proteobacteria;c__Alphaproteobacteria;o__Rickettsiales;f__mitochondria;g__Grevillea	0	0	0	3.16e-08	0	0	5.26667e-09
k__Bacteria;p__Proteobacteria;c__Alphaproteobacteria;o__Rickettsiales;f__mitochondria;g__Lupinus	3.84e-06	7.84023e-06	3.86e-06	3.9e-06	5.10999e-06	4.40002e-08	4.09904e-06
k__Bacteria;p__Proteobacteria;c__Alphaproteobacteria;o__Rickettsiales;f__mitochondria;g__Magnolia	0	0	0	8.31001e-08	0	0	1.385e-08
k__Bacteria;p__Proteobacteria;c__Alphaproteobacteria;o__Rickettsiales;f__mitochondria;g__Malus	1.12e-05	1.82005e-06	1.87e-06	5.61001e-06	9.53999e-07	1.59001e-06	3.84068e-06
k__Bacteria;p__Proteobacteria;c__Alphaproteobacteria;o__Rickettsiales;f__mitochondria;g__Nicotiana	1.71e-06	7.34021e-06	0	2.17e-06	8.57999e-07	1.35e-07	2.03554e-06
k__Bacteria;p__Proteobacteria;c__Alphaproteobacteria;o__Rickettsiales;f__mitochondria;g__Oenothera	1.45e-06	9.06026e-07	4.8e-06	2.86e-06	4.63999e-07	0	1.74667e-06
k__Bacteria;p__Proteobacteria;c__Alphaproteobacteria;o__Rickettsiales;f__mitochondria;g__Oryza	0	7.18021e-07	1.16e-07	6.25801e-07	5.34999e-07	3.84001e-08	3.3887e-07
k__Bacteria;p__Proteobacteria;c__Alphaproteobacteria;o__Rickettsiales;f__mitochondria;g__Panax	0	0	0	1.03e-08	0	0	1.71667e-09
k__Bacteria;p__Proteobacteria;c__Alphaproteobacteria;o__Rickettsiales;f__mitochondria;g__Phytophthora	0	0	0	2.72e-08	0	0	4.53334e-09
k__Bacteria;p__Proteobacteria;c__Alphaproteobacteria;o__Rickettsiales;f__mitochondria;g__Raphanus	0	0	1.02e-07	1.86e-07	0	0	4.8e-08
k__Bacteria;p__Proteobacteria;c__Alphaproteobacteria;o__Rickettsiales;f__mitochondria;g__Tasmannia	0	4.48013e-08	0	0	0	0	7.46688e-09
k__Bacteria;p__Proteobacteria;c__Alphaproteobacteria;o__Rickettsiales;f__mitochondria;g__Trochodendron	0	0	0	2.35e-08	0	0	3.91667e-09
k__Bacteria;p__Proteobacteria;c__Alphaproteobacteria;o__Rickettsiales;f__mitochondria;g__Vitis	2.8e-06	1.08003e-06	9.09e-07	2.67e-06	0	3.23001e-07	1.29701e-06
k__Bacteria;p__Proteobacteria;c__Alphaproteobacteria;o__Rickettsiales;f__mitochondria;Other	6.96e-07	1.18303e-06	8.07e-07	2.13475e-06	0	2.84001e-07	8.50798e-07
k__Bacteria;p__Proteobacteria;c__Alphaproteobacteria;o__Rickettsiales;Other;Other	0	0	0	3.89e-08	0	0	6.48334e-09
k__Bacteria;p__Proteobacteria;c__Alphaproteobacteria;o__Sphingomonadales;f__Sphingomonadaceae;g__Sphingobium	0	7.0002e-08	0	8.00001e-08	0	0	2.50004e-08
k__Bacteria;p__Proteobacteria;c__Alphaproteobacteria;o__Sphingomonadales;f__Sphingomonadaceae;g__Sphingomonas	0	5.36015e-07	0	3.6e-08	0	0	9.53359e-08
k__Bacteria;p__Proteobacteria;c__Alphaproteobacteria;o__Sphingomonadales;f__Sphingomonadaceae;g__Sphingopyxis	3.1e-07	0	0	0	0	0	5.16666e-08
k__Bacteria;p__Proteobacteria;c__Alphaproteobacteria;o__Sphingomonadales;f__Sphingomonadaceae;Other	0	0	5.28e-07	5.73001e-08	0	0	9.755e-08
k__Bacteria;p__Proteobacteria;c__Alphaproteobacteria;Other;Other;Other	1.35e-06	0	0	1.456e-06	0	2.65001e-06	9.09335e-07
k__Bacteria;p__Proteobacteria;c__Betaproteobacteria;[o__Burkholderiales/o__Ellin6067];Other;Other	0	0	0	1.63e-08	0	0	2.71667e-09
k__Bacteria;p__Proteobacteria;c__Betaproteobacteria;[o__Burkholderiales/o__Rhodocyclales];Other;Other	0	0	0	3.86e-08	0	0	6.43334e-09
k__Bacteria;p__Proteobacteria;c__Betaproteobacteria;o__Burkholderiales;f__Alcaligenaceae;g__Sutterella	0.00108994	0.00866524	0.007455	0.00152989	0.00192767	0.00180063	0.00374473
k__Bacteria;p__Proteobacteria;c__Betaproteobacteria;o__Burkholderiales;f__Alcaligenaceae;Other	0	0	0	1.29e-08	0	0	2.15e-09
k__Bacteria;p__Proteobacteria;c__Betaproteobacteria;o__Burkholderiales;f__Burkholderiaceae;g__Burkholderia	0	0	0	3.0335e-07	0	0	5.05584e-08
k__Bacteria;p__Proteobacteria;c__Betaproteobacteria;o__Burkholderiales;f__Burkholderiaceae;g__Lautropia	8.29899e-07	0	4.14e-07	9.67371e-06	4.74999e-07	2.95701e-07	1.94805e-06
k__Bacteria;p__Proteobacteria;c__Betaproteobacteria;o__Burkholderiales;f__Burkholderiaceae;Other	1.79e-07	0	0	3.52e-07	0	0	8.85e-08
k__Bacteria;p__Proteobacteria;c__Betaproteobacteria;o__Burkholderiales;f__Comamonadaceae;[g__Alicycliphilus/g__Diaphorobacter]	1.53e-07	1.06003e-07	0	2.885e-07	0	0	9.12505e-08
k__Bacteria;p__Proteobacteria;c__Betaproteobacteria;o__Burkholderiales;f__Comamonadaceae;[g__Comamonas/g__Diaphorobacter]	0	0	0	1.56e-07	4.54999e-07	2.26001e-06	4.78501e-07
k__Bacteria;p__Proteobacteria;c__Betaproteobacteria;o__Burkholderiales;f__Comamonadaceae;g__Acidovorax	0	8.01023e-08	2.464e-06	2.596e-07	0	0	4.67284e-07
k__Bacteria;p__Proteobacteria;c__Betaproteobacteria;o__Burkholderiales;f__Comamonadaceae;g__Aquabacterium	0	0	0	5.40001e-08	0	0	9.00001e-09
k__Bacteria;p__Proteobacteria;c__Betaproteobacteria;o__Burkholderiales;f__Comamonadaceae;g__Comamonas	0	1.03003e-07	3.99e-07	2.23868e-06	3.185e-06	2.17235e-05	4.60819e-06
k__Bacteria;p__Proteobacteria;c__Betaproteobacteria;o__Burkholderiales;f__Comamonadaceae;g__Delftia	0	2.14106e-07	0	1.002e-07	0	9.20003e-08	6.77178e-08
k__Bacteria;p__Proteobacteria;c__Betaproteobacteria;o__Burkholderiales;f__Comamonadaceae;g__Diaphorobacter	0	0	6.75e-07	3.8206e-07	0	4.97002e-08	1.8446e-07
k__Bacteria;p__Proteobacteria;c__Betaproteobacteria;o__Burkholderiales;f__Comamonadaceae;g__Hylemonella	1.03e-07	0	0	0	0	0	1.71667e-08
k__Bacteria;p__Proteobacteria;c__Betaproteobacteria;o__Burkholderiales;f__Comamonadaceae;g__Limnohabitans	0	0	0	1.68e-08	0	0	2.8e-09
k__Bacteria;p__Proteobacteria;c__Betaproteobacteria;o__Burkholderiales;f__Comamonadaceae;g__Polaromonas	0	0	0	4.03e-09	0	0	6.71667e-10
k__Bacteria;p__Proteobacteria;c__Betaproteobacteria;o__Burkholderiales;f__Comamonadaceae;g__Rubrivivax	0	0	0	1.47e-08	0	0	2.45e-09
k__Bacteria;p__Proteobacteria;c__Betaproteobacteria;o__Burkholderiales;f__Comamonadaceae;Other	6.19e-07	1.54204e-07	3.52e-07	2.11e-07	1.0315e-05	8.02003e-08	1.95523e-06
k__Bacteria;p__Proteobacteria;c__Betaproteobacteria;o__Burkholderiales;f__Oxalobacteraceae;g__Collimonas	0	0	0	0	0	3.52001e-09	5.86669e-10
k__Bacteria;p__Proteobacteria;c__Betaproteobacteria;o__Burkholderiales;f__Oxalobacteraceae;g__Herbaspirillum	0	0	1.76e-07	1.0645e-06	4.83999e-07	1.2723e-06	4.99467e-07
k__Bacteria;p__Proteobacteria;c__Betaproteobacteria;o__Burkholderiales;f__Oxalobacteraceae;g__Herminiimonas	0	0	0	1.99e-08	0	0	3.31667e-09
k__Bacteria;p__Proteobacteria;c__Betaproteobacteria;o__Burkholderiales;f__Oxalobacteraceae;g__Janthinobacterium	0	0	3.07e-07	2.56e-08	0	1.3e-06	2.72101e-07
k__Bacteria;p__Proteobacteria;c__Betaproteobacteria;o__Burkholderiales;f__Oxalobacteraceae;g__Oxalobacter	6.3894e-05	2.71383e-05	2.2967e-05	0.000100449	5.31299e-05	8.3338e-05	5.8486e-05
k__Bacteria;p__Proteobacteria;c__Betaproteobacteria;o__Burkholderiales;f__Oxalobacteraceae;g__Ralstonia	0	0	2.45e-07	0	0	0	4.08333e-08
k__Bacteria;p__Proteobacteria;c__Betaproteobacteria;o__Burkholderiales;f__Oxalobacteraceae;Other	1.989e-06	1.79895e-06	1.76e-06	5.09858e-06	5.28299e-06	7.16983e-06	3.84989e-06
k__Bacteria;p__Proteobacteria;c__Betaproteobacteria;o__Burkholderiales;Other;Other	1.11e-06	3.68011e-06	1.15e-06	7.49001e-07	0	9.34703e-07	1.27063e-06
k__Bacteria;p__Proteobacteria;c__Betaproteobacteria;o__Methylophilales;f__Methylophilaceae;g__Methylobacillus	0	0	0	1.88e-08	0	0	3.13334e-09
k__Bacteria;p__Proteobacteria;c__Betaproteobacteria;o__Neisseriales;f__Neisseriaceae;g__Eikenella	0	3.16409e-06	0	6.26101e-08	0	0	5.37784e-07
k__Bacteria;p__Proteobacteria;c__Betaproteobacteria;o__Neisseriales;f__Neisseriaceae;g__Kingella	0	2.97009e-07	0	3.7e-08	0	0	5.56681e-08
k__Bacteria;p__Proteobacteria;c__Betaproteobacteria;o__Neisseriales;f__Neisseriaceae;g__Neisseria	3.388e-06	7.11591e-06	4.493e-06	6.57591e-07	6.15799e-07	1.94277e-06	3.03551e-06
k__Bacteria;p__Proteobacteria;c__Betaproteobacteria;o__Neisseriales;f__Neisseriaceae;Other	0	3.5101e-07	1.217e-06	5.86001e-08	7.03999e-07	0	3.88435e-07
k__Bacteria;p__Proteobacteria;c__Betaproteobacteria;o__Nitrosomonadales;Other;Other	0	0	0	2.09e-08	0	0	3.48334e-09
k__Bacteria;p__Proteobacteria;c__Betaproteobacteria;o__Rhodocyclales;f__Rhodocyclaceae;g__Azospira	0	0	0	3.82e-08	0	0	6.36667e-09
k__Bacteria;p__Proteobacteria;c__Betaproteobacteria;o__Rhodocyclales;f__Rhodocyclaceae;g__Dechloromonas	0	5.13015e-08	0	1.88e-08	0	0	1.16836e-08
k__Bacteria;p__Proteobacteria;c__Betaproteobacteria;o__Rhodocyclales;f__Rhodocyclaceae;g__Hydrogenophilus	0	5.53016e-08	0	0	0	0	9.21693e-09
k__Bacteria;p__Proteobacteria;c__Betaproteobacteria;Other;Other;Other	0	9.53028e-07	0	6.20001e-08	0	0	1.69171e-07
k__Bacteria;p__Proteobacteria;c__Deltaproteobacteria;o__Desulfovibrionales;f__Desulfovibrionaceae;g__Bilophila	0.000392451	0.0008429	0.000578225	0.000510206	0.00104395	0.000821967	0.000698283
k__Bacteria;p__Proteobacteria;c__Deltaproteobacteria;o__Desulfovibrionales;f__Desulfovibrionaceae;g__Desulfovibrio	0.000531486	0.000294134	0.000380732	0.000829439	0.000814427	0.00113789	0.000664685
k__Bacteria;p__Proteobacteria;c__Deltaproteobacteria;o__Desulfovibrionales;f__Desulfovibrionaceae;Other	2.4979e-05	5.29255e-05	0.000109121	3.10974e-05	1.647e-05	3.36191e-05	4.4702e-05
k__Bacteria;p__Proteobacteria;c__Deltaproteobacteria;o__Desulfuromonadales;f__Geobacteraceae;g__Geobacter	0	0	0	1.56e-08	0	0	2.6e-09
k__Bacteria;p__Proteobacteria;c__Deltaproteobacteria;o__Myxococcales;f__0319-6G20;Other	0	2.13006e-07	0	1.21e-08	0	0	3.75177e-08
k__Bacteria;p__Proteobacteria;c__Epsilonproteobacteria;o__Campylobacterales;f__Campylobacteraceae;g__Arcobacter	0	0	0	7.18001e-08	0	0	1.19667e-08
k__Bacteria;p__Proteobacteria;c__Epsilonproteobacteria;o__Campylobacterales;f__Campylobacteraceae;g__Campylobacter	5.8724e-06	7.66991e-05	1.9164e-05	3.6034e-06	6.16999e-06	3.15871e-06	1.91113e-05
k__Bacteria;p__Proteobacteria;c__Epsilonproteobacteria;o__Campylobacterales;f__Helicobacteraceae;g__Helicobacter	0	0	0	2.381e-08	0	5.27002e-07	9.1802e-08
k__Bacteria;p__Proteobacteria;c__Gammaproteobacteria;[o__Aeromonadales/o__Enterobacteriales];Other;Other	5.03e-08	1.16603e-06	9.72e-06	5.74001e-07	1.53e-06	9.67003e-07	2.33456e-06
k__Bacteria;p__Proteobacteria;c__Gammaproteobacteria;[o__Aeromonadales/o__Vibrionales];Other;Other	0	2.97009e-07	0	0	0	0	4.95014e-08
k__Bacteria;p__Proteobacteria;c__Gammaproteobacteria;[o__Pseudomonadales/o__Aeromonadales/o__Alteromonadales/o__Enterobacteriales];Other;Other	0	5.95017e-07	0	0	0	0	9.91695e-08
k__Bacteria;p__Proteobacteria;c__Gammaproteobacteria;[o__Pseudomonadales/o__Enterobacteriales];Other;Other	2.69e-07	1.07003e-05	4.25e-06	0.000135942	0	2.55001e-08	2.51979e-05
k__Bacteria;p__Proteobacteria;c__Gammaproteobacteria;o__Aeromonadales;f__Aeromonadaceae;g__Aeromonas	0	0.000429156	0	0	0	0	7.1526e-05
k__Bacteria;p__Proteobacteria;c__Gammaproteobacteria;o__Aeromonadales;f__Aeromonadaceae;Other	0	6.70357e-05	0	0	0	0	1.11726e-05
k__Bacteria;p__Proteobacteria;c__Gammaproteobacteria;o__Aeromonadales;f__Succinivibrionaceae;g__Succinatimonas	0	6.7502e-06	0	2.31e-06	0	0	1.51003e-06
k__Bacteria;p__Proteobacteria;c__Gammaproteobacteria;o__Aeromonadales;f__Succinivibrionaceae;g__Succinivibrio	0.000161167	0.000952148	0.00207416	0.000226316	0	5.29436e-05	0.000577789
k__Bacteria;p__Proteobacteria;c__Gammaproteobacteria;o__Aeromonadales;f__Succinivibrionaceae;Other	1.65e-07	0	0	9.34001e-08	0	0	4.30667e-08
k__Bacteria;p__Proteobacteria;c__Gammaproteobacteria;o__Alteromonadales;f__Shewanellaceae;g__Shewanella	0	8.92026e-07	0	0	0	0	1.48671e-07
k__Bacteria;p__Proteobacteria;c__Gammaproteobacteria;o__Cardiobacteriales;f__Cardiobacteriaceae;g__Cardiobacterium	5.41e-07	0	9.51e-07	2.903e-07	1.0728e-06	2.83961e-07	5.23177e-07
k__Bacteria;p__Proteobacteria;c__Gammaproteobacteria;o__Enterobacteriales;f__Enterobacteriaceae;[g__Citrobacter/g__Raoultella]	5.03e-08	6.70019e-08	0	3.22e-07	0	0	7.3217e-08
k__Bacteria;p__Proteobacteria;c__Gammaproteobacteria;o__Enterobacteriales;f__Enterobacteriaceae;[g__Enterobacter/g__Erwinia]	0	4.09212e-07	3.96e-07	0	0	6.50002e-07	2.42536e-07
k__Bacteria;p__Proteobacteria;c__Gammaproteobacteria;o__Enterobacteriales;f__Enterobacteriaceae;[g__Enterobacter/g__Kluyvera]	0	3.99012e-07	3.96e-07	3.85e-07	0	4.51002e-07	2.71836e-07
k__Bacteria;p__Proteobacteria;c__Gammaproteobacteria;o__Enterobacteriales;f__Enterobacteriaceae;[g__Enterobacter/g__Pantoea]	2.51e-07	4.28012e-05	0.00020482	2.86e-06	1.01e-06	3.67001e-06	4.25687e-05
k__Bacteria;p__Proteobacteria;c__Gammaproteobacteria;o__Enterobacteriales;f__Enterobacteriaceae;[g__Escherichia/g__Citrobacter]	1.57e-05	0	1.2e-05	9.41001e-06	0	2.33001e-06	6.57333e-06
k__Bacteria;p__Proteobacteria;c__Gammaproteobacteria;o__Enterobacteriales;f__Enterobacteriaceae;[g__Escherichia/g__Shigella]	0.00013755	0.000112918	0.00019708	3.92774e-05	1.2686e-05	3.27719e-05	8.87139e-05
k__Bacteria;p__Proteobacteria;c__Gammaproteobacteria;o__Enterobacteriales;f__Enterobacteriaceae;[g__Klebsiella/g__Citrobacter]	1.51e-07	1.14443e-06	3.97e-06	8.33301e-07	0	9.28003e-07	1.17112e-06
k__Bacteria;p__Proteobacteria;c__Gammaproteobacteria;o__Enterobacteriales;f__Enterobacteriaceae;[g__Klebsiella/g__Enterobacter]	8.0124e-06	1.82286e-05	0.000136544	1.30487e-05	6.57499e-06	2.74399e-05	3.49748e-05
k__Bacteria;p__Proteobacteria;c__Gammaproteobacteria;o__Enterobacteriales;f__Enterobacteriaceae;[g__Klebsiella/g__Enterobacter/g__Kluyvera]	0	3.01209e-07	4.82e-07	1.972e-07	5.09999e-07	3.09001e-07	2.99902e-07
k__Bacteria;p__Proteobacteria;c__Gammaproteobacteria;o__Enterobacteriales;f__Enterobacteriaceae;[g__Klebsiella/g__Enterobacter/g__Pantoea]	5.05e-07	1.16403e-06	6.91e-06	5.16001e-07	0	9.50003e-07	1.67417e-06
k__Bacteria;p__Proteobacteria;c__Gammaproteobacteria;o__Enterobacteriales;f__Enterobacteriaceae;[g__Klebsiella/g__Erwinia]	0	1.81005e-07	0	1.82e-08	0	0	3.32009e-08
k__Bacteria;p__Proteobacteria;c__Gammaproteobacteria;o__Enterobacteriales;f__Enterobacteriaceae;[g__Klebsiella/g__Kluyvera]	0	1.23104e-06	1.896e-05	8.98001e-07	1.02e-06	1.255e-06	3.89401e-06
k__Bacteria;p__Proteobacteria;c__Gammaproteobacteria;o__Enterobacteriales;f__Enterobacteriaceae;[g__Klebsiella/g__Leclercia]	0	1.20003e-07	0	1.06e-07	0	1.45001e-07	6.1834e-08
k__Bacteria;p__Proteobacteria;c__Gammaproteobacteria;o__Enterobacteriales;f__Enterobacteriaceae;[g__Klebsiella/g__Pantoea]	7.13e-07	3.71431e-06	1.422e-05	4.961e-07	0	1.228e-06	3.39524e-06
k__Bacteria;p__Proteobacteria;c__Gammaproteobacteria;o__Enterobacteriales;f__Enterobacteriaceae;[g__Klebsiella/g__Pantoea/g__Enterobacter]	6.1e-07	1.70205e-06	2.63e-06	3.315e-07	1.04e-06	7.24003e-08	1.06432e-06
k__Bacteria;p__Proteobacteria;c__Gammaproteobacteria;o__Enterobacteriales;f__Enterobacteriaceae;[g__Klebsiella/g__Pantoea/g__Kluyvera]	5.03e-08	5.79017e-07	1.52e-06	2.75e-07	1.06e-06	5.79002e-07	6.7722e-07
k__Bacteria;p__Proteobacteria;c__Gammaproteobacteria;o__Enterobacteriales;f__Enterobacteriaceae;[g__Pantoea/g__Erwinia]	0	0	1.42e-06	2.19e-08	0	0	2.40317e-07
k__Bacteria;p__Proteobacteria;c__Gammaproteobacteria;o__Enterobacteriales;f__Enterobacteriaceae;[g__Pantoea/g__Kluyvera]	0	2.14006e-07	5.4e-06	2.07e-07	2.06e-07	8.69003e-07	1.14933e-06
k__Bacteria;p__Proteobacteria;c__Gammaproteobacteria;o__Enterobacteriales;f__Enterobacteriaceae;[g__Rahnella/g__Serratia]	5.03e-08	0	0	7.46001e-08	0	0	2.08167e-08
k__Bacteria;p__Proteobacteria;c__Gammaproteobacteria;o__Enterobacteriales;f__Enterobacteriaceae;[g__Raoultella/g__Citrobacter]	1.513e-07	0	0	1.02e-07	0	1.81001e-07	7.23834e-08
k__Bacteria;p__Proteobacteria;c__Gammaproteobacteria;o__Enterobacteriales;f__Enterobacteriaceae;[g__Salmonella/g__Yokenella]	0	6.02017e-08	4.82e-07	2.534e-08	0	0	9.45903e-08
k__Bacteria;p__Proteobacteria;c__Gammaproteobacteria;o__Enterobacteriales;f__Enterobacteriaceae;[g__Serratia/g__Raoultella]	0	1.20003e-07	3.96e-07	4.19e-08	5.09999e-07	0	1.77984e-07
k__Bacteria;p__Proteobacteria;c__Gammaproteobacteria;o__Enterobacteriales;f__Enterobacteriaceae;[g__Shigella/g__Citrobacter]	0	3.23009e-07	0	2.66e-07	0	3.47001e-07	1.56002e-07
k__Bacteria;p__Proteobacteria;c__Gammaproteobacteria;o__Enterobacteriales;f__Enterobacteriaceae;[g__Trabulsiella/g__Enterobacter]	0	0	4.33e-06	2.24e-08	0	0	7.254e-07
k__Bacteria;p__Proteobacteria;c__Gammaproteobacteria;o__Enterobacteriales;f__Enterobacteriaceae;g__Buttiauxella	9.48999e-07	1.36004e-06	6.39e-06	3.57e-06	5.82999e-06	5.38002e-06	3.91318e-06
k__Bacteria;p__Proteobacteria;c__Gammaproteobacteria;o__Enterobacteriales;f__Enterobacteriaceae;g__Cedecea	0	1.20003e-07	0	0	0	0	2.00006e-08
k__Bacteria;p__Proteobacteria;c__Gammaproteobacteria;o__Enterobacteriales;f__Enterobacteriaceae;g__Citrobacter	0.000101277	4.79287e-05	6.1475e-05	0.000129435	1.55278e-05	6.05294e-05	6.93621e-05
k__Bacteria;p__Proteobacteria;c__Gammaproteobacteria;o__Enterobacteriales;f__Enterobacteriaceae;g__Cronobacter	3.89e-07	3.09609e-06	1.768e-06	1.3856e-07	0	1.136e-07	9.17542e-07
k__Bacteria;p__Proteobacteria;c__Gammaproteobacteria;o__Enterobacteriales;f__Enterobacteriaceae;g__Enterobacter	1.60813e-05	4.78729e-05	0.000194665	3.59586e-05	2.2845e-05	4.7034e-05	6.07428e-05
k__Bacteria;p__Proteobacteria;c__Gammaproteobacteria;o__Enterobacteriales;f__Enterobacteriaceae;g__Erwinia	4.3903e-06	2.71449e-05	1.1253e-05	5.61686e-06	1.02e-06	2.77931e-06	8.70072e-06
k__Bacteria;p__Proteobacteria;c__Gammaproteobacteria;o__Enterobacteriales;f__Enterobacteriaceae;g__Escherichia	0.00569791	0.00495609	0.00853588	0.00148348	0.00121533	0.00163549	0.0039207
k__Bacteria;p__Proteobacteria;c__Gammaproteobacteria;o__Enterobacteriales;f__Enterobacteriaceae;g__Ewingella	0	0	0	8.80001e-09	0	0	1.46667e-09
k__Bacteria;p__Proteobacteria;c__Gammaproteobacteria;o__Enterobacteriales;f__Enterobacteriaceae;g__Gluconacetobacter	3.222e-06	0	0	1.1181e-07	0	0	5.55635e-07
k__Bacteria;p__Proteobacteria;c__Gammaproteobacteria;o__Enterobacteriales;f__Enterobacteriaceae;g__Klebsiella	8.13075e-05	0.00030056	0.00111259	0.000182056	0.000199175	0.000278515	0.000359035
k__Bacteria;p__Proteobacteria;c__Gammaproteobacteria;o__Enterobacteriales;f__Enterobacteriaceae;g__Kluyvera	6.053e-07	1.28904e-06	1.4315e-05	1.9716e-06	5.09999e-07	3.09801e-06	3.63149e-06
k__Bacteria;p__Proteobacteria;c__Gammaproteobacteria;o__Enterobacteriales;f__Enterobacteriaceae;g__Moellerella	0	1.02003e-07	0	0	0	0	1.70005e-08
k__Bacteria;p__Proteobacteria;c__Gammaproteobacteria;o__Enterobacteriales;f__Enterobacteriaceae;g__Morganella	4.62e-06	8.41582e-05	6.4482e-05	4.186e-07	0	2.12001e-08	2.56167e-05
k__Bacteria;p__Proteobacteria;c__Gammaproteobacteria;o__Enterobacteriales;f__Enterobacteriaceae;g__Pantoea	2.013e-07	6.9402e-07	4.55e-07	8.74841e-07	0	6.08702e-07	4.7231e-07
k__Bacteria;p__Proteobacteria;c__Gammaproteobacteria;o__Enterobacteriales;f__Enterobacteriaceae;g__Plesiomonas	0	1.61005e-06	0	0	0	0	2.68341e-07
k__Bacteria;p__Proteobacteria;c__Gammaproteobacteria;o__Enterobacteriales;f__Enterobacteriaceae;g__Proteus	6.512e-06	7.62013e-05	0.00022482	2.681e-07	0	7.88003e-08	5.13134e-05
k__Bacteria;p__Proteobacteria;c__Gammaproteobacteria;o__Enterobacteriales;f__Enterobacteriaceae;g__Providencia	0	0	0	3.556e-07	0	0	5.92667e-08
k__Bacteria;p__Proteobacteria;c__Gammaproteobacteria;o__Enterobacteriales;f__Enterobacteriaceae;g__Pseudomonas	0	0	2.36e-07	4.51e-08	0	0	4.685e-08
k__Bacteria;p__Proteobacteria;c__Gammaproteobacteria;o__Enterobacteriales;f__Enterobacteriaceae;g__Rahnella	6.84e-07	0	0	1.625e-07	0	9.06003e-08	1.56183e-07
k__Bacteria;p__Proteobacteria;c__Gammaproteobacteria;o__Enterobacteriales;f__Enterobacteriaceae;g__Raoultella	2.1759e-05	4.09592e-06	3.0969e-05	3.5436e-06	9.35999e-07	2.15001e-06	1.05756e-05
k__Bacteria;p__Proteobacteria;c__Gammaproteobacteria;o__Enterobacteriales;f__Enterobacteriaceae;g__Salmonella	2.515e-07	3.78171e-06	0.000104568	1.83192e-06	0	1.069e-06	1.85837e-05
k__Bacteria;p__Proteobacteria;c__Gammaproteobacteria;o__Enterobacteriales;f__Enterobacteriaceae;g__Serratia	0.000106411	0.000431291	3.1047e-05	4.25063e-06	1.237e-06	1.59164e-05	9.83588e-05
k__Bacteria;p__Proteobacteria;c__Gammaproteobacteria;o__Enterobacteriales;f__Enterobacteriaceae;g__Shigella	4.16374e-05	4.60144e-05	0.000103325	1.13722e-05	1.0098e-05	1.1729e-05	3.73627e-05
k__Bacteria;p__Proteobacteria;c__Gammaproteobacteria;o__Enterobacteriales;f__Enterobacteriaceae;g__Trabulsiella	4.319e-07	1.28984e-06	3.872e-06	3.1962e-07	0	1.90141e-06	1.30246e-06
k__Bacteria;p__Proteobacteria;c__Gammaproteobacteria;o__Enterobacteriales;f__Enterobacteriaceae;g__Yersinia	2.1281e-05	4.40613e-06	0	3.108e-06	0	2.49101e-06	5.21435e-06
k__Bacteria;p__Proteobacteria;c__Gammaproteobacteria;o__Enterobacteriales;f__Enterobacteriaceae;Other	0.00167645	0.00347495	0.00455489	0.000642029	0.000519426	0.000826531	0.00194905
k__Bacteria;p__Proteobacteria;c__Gammaproteobacteria;o__Legionellales;f__Legionellaceae;g__Legionella	0	0	0	7.87001e-08	0	0	1.31167e-08
k__Bacteria;p__Proteobacteria;c__Gammaproteobacteria;o__Legionellales;f__Legionellaceae;Other	0	0	0	0	0	6.68002e-08	1.11334e-08
k__Bacteria;p__Proteobacteria;c__Gammaproteobacteria;o__Legionellales;Other;Other	0	0	0	4.02e-08	0	0	6.70001e-09
k__Bacteria;p__Proteobacteria;c__Gammaproteobacteria;o__Oceanospirillales;f__Halomonadaceae;g__Halomonas	0	0	0	3.64e-08	0	0	6.06667e-09
k__Bacteria;p__Proteobacteria;c__Gammaproteobacteria;o__Oceanospirillales;f__Halomonadaceae;Other	0	0	0	5.01001e-09	0	0	8.35001e-10
k__Bacteria;p__Proteobacteria;c__Gammaproteobacteria;o__Oceanospirillales;f__Oceanospirillaceae;g__Marinomonas	0	7.59022e-08	0	0	0	0	1.26504e-08
k__Bacteria;p__Proteobacteria;c__Gammaproteobacteria;o__Pasteurellales;f__Pasteurellaceae;[g__Haemophilus/g__Actinobacillus]	9.06999e-07	2.00206e-06	5.2e-07	1.1171e-06	8.24999e-07	1.3584e-06	1.12159e-06
k__Bacteria;p__Proteobacteria;c__Gammaproteobacteria;o__Pasteurellales;f__Pasteurellaceae;[g__Haemophilus/g__Aggregatibacter]	8.44999e-07	1.48504e-06	5.27e-06	1.845e-06	0	1.41501e-06	1.81001e-06
k__Bacteria;p__Proteobacteria;c__Gammaproteobacteria;o__Pasteurellales;f__Pasteurellaceae;g__Actinobacillus	1.5153e-06	4.86344e-06	1.5354e-05	2.51362e-06	1.8588e-06	3.91125e-06	5.00274e-06
k__Bacteria;p__Proteobacteria;c__Gammaproteobacteria;o__Pasteurellales;f__Pasteurellaceae;g__Aggregatibacter	1.2356e-06	7.95863e-06	3.285e-06	1.32786e-06	0	2.21161e-06	2.66978e-06
k__Bacteria;p__Proteobacteria;c__Gammaproteobacteria;o__Pasteurellales;f__Pasteurellaceae;g__Haemophilus	0.00102638	0.00159926	0.00311789	0.000403656	0.000240306	0.000360139	0.00112461
k__Bacteria;p__Proteobacteria;c__Gammaproteobacteria;o__Pasteurellales;f__Pasteurellaceae;g__Pasteurella	0	0	0	8.05001e-08	0	1.58001e-07	3.97501e-08
k__Bacteria;p__Proteobacteria;c__Gammaproteobacteria;o__Pasteurellales;f__Pasteurellaceae;Other	6.66e-06	5.45316e-06	1.564e-05	7.67401e-07	0	8.37503e-07	4.89301e-06
k__Bacteria;p__Proteobacteria;c__Gammaproteobacteria;o__Pseudomonadales;[f__Pseudomonadaceae/f__Moraxellaceae];Other	1.29e-07	6.05017e-07	0	4.79e-08	0	0	1.3032e-07
k__Bacteria;p__Proteobacteria;c__Gammaproteobacteria;o__Pseudomonadales;f__Moraxellaceae;g__Acinetobacter	1.0464e-06	2.13633e-05	1.258e-06	1.14193e-06	1.943e-06	5.93202e-07	4.55764e-06
k__Bacteria;p__Proteobacteria;c__Gammaproteobacteria;o__Pseudomonadales;f__Moraxellaceae;g__Enhydrobacter	0	5.36015e-07	1.17e-06	0	0	0	2.84336e-07
k__Bacteria;p__Proteobacteria;c__Gammaproteobacteria;o__Pseudomonadales;f__Moraxellaceae;g__Moraxella	0	1.85705e-07	0	0	0	0	3.09509e-08
k__Bacteria;p__Proteobacteria;c__Gammaproteobacteria;o__Pseudomonadales;f__Moraxellaceae;g__Psychrobacter	0	0	3.52e-07	4.61e-09	0	0	5.9435e-08
k__Bacteria;p__Proteobacteria;c__Gammaproteobacteria;o__Pseudomonadales;f__Moraxellaceae;Other	0	3.66011e-07	3.806e-06	5.18701e-08	0	0	7.0398e-07
k__Bacteria;p__Proteobacteria;c__Gammaproteobacteria;o__Pseudomonadales;f__Pseudomonadaceae;g__Pseudomonas	6.116e-06	8.52265e-06	4.1938e-05	9.43102e-05	8.57999e-08	1.87459e-06	2.54745e-05
k__Bacteria;p__Proteobacteria;c__Gammaproteobacteria;o__Pseudomonadales;f__Pseudomonadaceae;Other	0	2.57207e-07	0	1.05e-08	0	0	4.46179e-08
k__Bacteria;p__Proteobacteria;c__Gammaproteobacteria;o__Vibrionales;f__Pseudoalteromonadaceae;g__Pseudoalteromonas	0	0	0	2.49e-08	0	0	4.15e-09
k__Bacteria;p__Proteobacteria;c__Gammaproteobacteria;o__Xanthomonadales;f__Sinobacteraceae;Other	0	2.79008e-07	0	8.57001e-09	0	0	4.79297e-08
k__Bacteria;p__Proteobacteria;c__Gammaproteobacteria;o__Xanthomonadales;f__Xanthomonadaceae;g__Pseudoxanthomonas	0	3.75011e-07	0	0	0	0	6.25018e-08
k__Bacteria;p__Proteobacteria;c__Gammaproteobacteria;o__Xanthomonadales;f__Xanthomonadaceae;g__Stenotrophomonas	0	0	0	5.97001e-08	0	0	9.95001e-09
k__Bacteria;p__Proteobacteria;c__Gammaproteobacteria;o__Xanthomonadales;f__Xanthomonadaceae;Other	0	2.15006e-07	0	6.09691e-06	1.672e-06	5.52002e-08	1.33985e-06
k__Bacteria;p__Spirochaetes;c__Spirochaetes;o__Spirochaetales;f__Spirochaetaceae;g__Treponema	0	4.57013e-07	0	1.78265e-05	0	8.65003e-06	4.48893e-06
k__Bacteria;p__Synergistetes;c__Synergistia;o__Synergistales;f__Dethiosulfovibrionaceae;g__Jonquetella	0	0	0	1.57e-07	0	0	2.61667e-08
k__Bacteria;p__Synergistetes;c__Synergistia;o__Synergistales;f__Dethiosulfovibrionaceae;g__Pyramidobacter	4.97e-07	1.22514e-06	0	4.424e-07	4.74999e-07	1.15e-07	4.59089e-07
k__Bacteria;p__Synergistetes;c__Synergistia;o__Synergistales;f__Synergistaceae;g__Cloacibacillus	7.82e-06	1.84005e-07	0	7.53236e-06	1.77e-05	3.43748e-05	1.12685e-05
k__Bacteria;p__Synergistetes;c__Synergistia;o__Synergistales;f__Synergistaceae;g__Synergistes	1.61003e-05	0	1.846e-06	6.11321e-06	1.25798e-05	2.95471e-06	6.599e-06
k__Bacteria;p__Synergistetes;c__Synergistia;o__Synergistales;f__Synergistaceae;Other	0	0	0	8.22051e-06	7.54999e-06	7.48153e-06	3.87534e-06
k__Bacteria;p__Tenericutes;c__Mollicutes;o__Anaeroplasmatales;f__Anaeroplasmataceae;g__Anaeroplasma	4.94e-07	4.96014e-07	0	6.35841e-07	0	0	2.70976e-07
k__Bacteria;p__Tenericutes;c__Mollicutes;o__Anaeroplasmatales;f__Anaeroplasmataceae;Other	5.47e-06	0.000101468	0	5.41113e-05	2.275e-06	8.76433e-05	4.18279e-05
k__Bacteria;p__Tenericutes;c__Mollicutes;o__Mycoplasmatales;f__Mycoplasmataceae;g__Mycoplasma	0	1.37004e-06	0	0	0	9.63003e-08	2.4439e-07
k__Bacteria;p__Tenericutes;c__Mollicutes;o__RF39;Other;Other	0.00238791	0.000754873	0.000247929	0.0039297	0.00135144	0.00200261	0.00177908
k__Bacteria;p__Tenericutes;c__Mollicutes;Other;Other;Other	0	0	0	4.75e-09	0	0	7.91667e-10
k__Bacteria;p__Tenericutes;c__RF3;o__ML615J-28;Other;Other	3.203e-05	0.000126265	3.541e-05	8.15741e-05	2.293e-06	4.11151e-05	5.31145e-05
k__Bacteria;p__Thermi;c__Deinococci;o__Thermales;f__Thermaceae;g__Meiothermus	0	0	0	3.55e-08	0	0	5.91667e-09
k__Bacteria;p__TM6;c__SJA-4;Other;Other;Other	0	0	0	4.95e-08	0	0	8.25001e-09
k__Bacteria;p__Verrucomicrobia;c__Opitutae;o__Cerasicoccales;f__Cerasicoccaceae;Other	1.548e-06	0	0	3.45e-07	0	3.44701e-06	8.90002e-07
k__Bacteria;p__Verrucomicrobia;c__Verruco-5;o__WCHB1-41;f__RFP12;Other	0	0	0	0	0	7.90603e-06	1.31767e-06
k__Bacteria;p__Verrucomicrobia;c__Verrucomicrobiae;o__Verrucomicrobiales;f__Verrucomicrobiaceae;g__Akkermansia	0.0164409	0.00566122	0.00880488	0.0135551	0.0106278	0.012862	0.0113253
k__Bacteria;p__WPS-2;Other;Other;Other;Other	0	0	0	9.93001e-06	0	0	1.655e-06
