# Supplementary material for: Proton pump inhibitors affect the gut microbiome
Source: HighWire-hosted journal article supplement (doi:10.1136/gutjnl-2015-310376), 2015-12-09
Supplement: gutjnl-2015-310376supp_table2.xls [file gutjnl-2015-310376supp_table2.xls]

## Sheet: Meta_Analaysis_PPI_LLD_IBD_IBS_
Variable	Direction	Taxon	Coefficients	SampelSizes	SampleSizeNonZero	Pvalues	FDR Qvalues	Zscores	DatasetNames	TotalSampleCount	TotalSampleNonZeroCount	Direction	MetaZscore	MetaPvalue	MetaQvalue	%Non_PPI_overall	%PPI_overall	%Non_PPI_LLd	%PPI_LLd	%Non_PPI_IBD	%PPI_IBD	%Non_PPI_IBS	%PPI_IBS	%Oral	HigherInOralThanOverall	nonZ_nPPI	nonZ_PPI	nonZ_nPPI_IBS	nonZ_PPI_IBS	nonZ_nPPI_IBD	nonZ_PPI_IBD	nonZ_nPPI_LLD	nonZ_PPI_LLD	Cochrans_Q	Cochrans_Q P-value
PPI	Increased	k__Bacteria|p__Actinobacteria|c__Actinobacteria|o__Actinomycetales|f__Micrococcaceae|g__Rothia	0.00668455666930765;0.00652326623241699;0.0114401555191545	345;1174;309	228;786;210	8.74981423086269E-11;5.58055561584859E-18;4.99724043313953E-14	7.42862783868819E-8;6.93105007488394E-15;3.99979124268488E-11	6.4871105442710455;8.640831119565412;7.531990997965021	miSeqRuns_UMCG-IBD-TIFN_Taxman_100Pc_GG13-PPI.txt;miSeqRuns_UMCG-IBD-TIFN_Taxman_100Pc_GG13-Reducing_stomach_acid2.txt;miSeqRuns_UMCG-IBD-TIFN_Taxman_100Pc_GG13-ZICPPI.txt	1828	1224	Increased	12.8396	9.83471e-38	2.85218e-35	0.000123491	0.000709404	0.0001059	0.000453982	0.000244932	0.0012737	8.76534e-05	0.000541341	0.0784819	1	1365	184	180	85	152	54	1033	45	76.802	0.0134239
PPI	Increased	k__Bacteria|p__Actinobacteria|c__Actinobacteria|o__Actinomycetales|f__Micrococcaceae	0.00666456932581914;0.00643399522576854;0.0115458844619272	345;1174;309	230;795;213	1.05472443598274E-10;1.76671396390098E-17;2.33851792077798E-14	7.42862783868819E-8;1.75540699453201E-14;2.33968717973837E-11	6.458891862045745;8.508188768974037;7.630496236958166	miSeqRuns_UMCG-IBD-TIFN_Taxman_100Pc_GG13-PPI.txt;miSeqRuns_UMCG-IBD-TIFN_Taxman_100Pc_GG13-Reducing_stomach_acid2.txt;miSeqRuns_UMCG-IBD-TIFN_Taxman_100Pc_GG13-ZICPPI.txt	1828	1238	Increased	12.7616	2.68734e-37	3.89679e-35	0.00012524	0.00071079	0.000107862	0.000455597	0.000246609	0.00127551	8.86732e-05	0.000541782	0.0792079	1	1382	185	182	85	154	55	1046	45	78.8882	0.00876755
PPI	Increased	k__Bacteria|p__Firmicutes|c__Bacilli|o__Lactobacillales	0.0666158637200294;0.0817068549288431;0.128837908036417	345;1174;309	344;1173;309	1.72833428999258E-8;2.41976817983206E-18;1.52665307720845E-13	5.39240298477685E-6;4.0071361058019E-15;1.01827760249804E-10	5.6372038982131984;8.735781730120687;7.38481517582945	miSeqRuns_UMCG-IBD-TIFN_Taxman_100Pc_GG13-PPI.txt;miSeqRuns_UMCG-IBD-TIFN_Taxman_100Pc_GG13-Reducing_stomach_acid2.txt;miSeqRuns_UMCG-IBD-TIFN_Taxman_100Pc_GG13-ZICPPI.txt	1828	1826	Increased	12.486	8.90363e-36	6.96895e-34	0.0217883	0.0792176	0.0201959	0.0606368	0.036121	0.114255	0.0157595	0.0740662	0.383651	1	2132	210	288	99	241	60	1603	51	70.272	0.0346024
PPI	Increased	k__Bacteria|p__Actinobacteria|c__Actinobacteria|o__Actinomycetales|f__Micrococcaceae|g__Rothia|s__mucilaginosa	0.00637682376471513;0.00553788643868078;0.0115040256614277	345;1174;309	198;683;184	4.48270761639804E-11;1.27592982904095E-15;5.88284848123521E-15	5.59441910526476E-8;9.0554562723935E-13;7.84771987396777E-12	6.587176011104031;7.9968978727172;7.806434577875191	miSeqRuns_UMCG-IBD-TIFN_Taxman_100Pc_GG13-PPI.txt;miSeqRuns_UMCG-IBD-TIFN_Taxman_100Pc_GG13-Reducing_stomach_acid2.txt;miSeqRuns_UMCG-IBD-TIFN_Taxman_100Pc_GG13-ZICPPI.txt	1828	1065	Increased	12.4799	9.61198e-36	6.96895e-34	0.000100518	0.00055471	8.45963e-05	0.000350475	0.000208179	0.000978817	6.99622e-05	0.000452217	0.031801	1	1165	173	151	78	129	51	885	44	84.0435	0.00189788
PPI	Increased	k__Bacteria|p__Firmicutes|c__Bacilli|o__Lactobacillales|f__Streptococcaceae|g__Streptococcus	0.0728911283206506;0.0676567643972255;0.1206984191961	345;1174;309	344;1172;308	1.34500058901024E-10;7.18794413705835E-15;5.60000310760797E-16	7.42862783868819E-8;4.46371330911324E-12;2.0563566801875E-12	6.421994754013539;7.781130251585272;8.0977172684001	miSeqRuns_UMCG-IBD-TIFN_Taxman_100Pc_GG13-PPI.txt;miSeqRuns_UMCG-IBD-TIFN_Taxman_100Pc_GG13-Reducing_stomach_acid2.txt;miSeqRuns_UMCG-IBD-TIFN_Taxman_100Pc_GG13-ZICPPI.txt	1828	1824	Increased	12.355	4.57909e-35	2.65597e-33	0.0168029	0.0580627	0.0163786	0.0472705	0.0236258	0.0744928	0.0126913	0.0596828	0.348044	1	2129	210	288	99	240	60	1601	51	86.409	0.000638
PPI	Increased	k__Bacteria|p__Firmicutes|c__Bacilli|o__Lactobacillales|f__Streptococcaceae	0.0732905203437338;0.066376641810199;0.119093402659065	345;1174;309	344;1172;309	1.38889943565217E-10;2.45565498128273E-14;1.02766450783983E-15	7.42862783868819E-8;1.35552154966807E-11;2.0563566801875E-12	6.417105208315694;7.624193124517012;8.023509003427193	miSeqRuns_UMCG-IBD-TIFN_Taxman_100Pc_GG13-PPI.txt;miSeqRuns_UMCG-IBD-TIFN_Taxman_100Pc_GG13-Reducing_stomach_acid2.txt;miSeqRuns_UMCG-IBD-TIFN_Taxman_100Pc_GG13-ZICPPI.txt	1828	1825	Increased	12.1966	3.24193e-34	1.56699e-32	0.0175204	0.0584246	0.0169746	0.0477058	0.0252093	0.0746831	0.0131389	0.0601041	0.35441	1	2131	210	288	99	241	60	1602	51	86.6023	0.000573
PPI	Increased	k__Bacteria|p__Firmicutes|c__Bacilli	0.0721613870855062;0.0788779933931525;0.118478634369003	345;1174;309	344;1174;309	2.21160411960519E-9;3.20713690622098E-17;7.22963248553741E-12	7.5274962034562E-7;2.65550935835097E-14;4.13328417244581E-9	5.981449658800294;8.438762980580016;6.853041057477832	miSeqRuns_UMCG-IBD-TIFN_Taxman_100Pc_GG13-PPI.txt;miSeqRuns_UMCG-IBD-TIFN_Taxman_100Pc_GG13-Reducing_stomach_acid2.txt;miSeqRuns_UMCG-IBD-TIFN_Taxman_100Pc_GG13-ZICPPI.txt	1828	1827	Increased	12.1789	4.02817e-34	1.66888e-32	0.0255599	0.0826012	0.0242429	0.0651127	0.0407511	0.11679	0.0177909	0.0763275	0.459521	1	2133	210	288	99	241	60	1604	51	64.4743	0.059913
PPI	Increased	k__Bacteria|p__Actinobacteria|c__Actinobacteria|o__Actinomycetales|f__Micrococcaceae|g__Rothia|s__dentocariosa	0.00431626990389734;0.00249529371375706;0.00282038243240702	345;1174;309	121;364;123	8.39421526299533E-13;1.93958405023038E-12;1.72639775427643E-5	1.57139709723273E-9;6.88275254396039E-10;0.0057575365105119	7.154559302774806;7.038759789614701;4.297622601636579	miSeqRuns_UMCG-IBD-TIFN_Taxman_100Pc_GG13-PPI.txt;miSeqRuns_UMCG-IBD-TIFN_Taxman_100Pc_GG13-Reducing_stomach_acid2.txt;miSeqRuns_UMCG-IBD-TIFN_Taxman_100Pc_GG13-ZICPPI.txt	1828	608	Increased	10.5159	7.29687e-26	2.64522e-24	1.89117e-05	0.000149942	1.66031e-05	0.000100156	3.38836e-05	0.000286499	1.5014e-05	8.59281e-05	0.0424373	1	656	122	88	52	84	37	484	33	76.7899	0.0134541
PPI	Increased	k__Bacteria|p__Actinobacteria|c__Actinobacteria|o__Actinomycetales	0.0134431344614586;0.00807590012797472;0.0142539107391173	345;1174;309	337;1162;302	3.06282853345399E-10;2.54227970404344E-8;6.01720054918526E-9	1.43340375365647E-7;3.08049891943605E-6;3.01010457472993E-6	6.295564659189757;5.57035009489322;5.816278996723703	miSeqRuns_UMCG-IBD-TIFN_Taxman_100Pc_GG13-PPI.txt;miSeqRuns_UMCG-IBD-TIFN_Taxman_100Pc_GG13-Reducing_stomach_acid2.txt;miSeqRuns_UMCG-IBD-TIFN_Taxman_100Pc_GG13-ZICPPI.txt	1828	1801	Increased	9.59035	8.77876e-22	2.82882e-20	0.00102817	0.00193978	0.00102522	0.00168444	0.00130969	0.00262285	0.000804396	0.00163185	0.180154	1	2098	207	282	98	235	59	1581	50	84.022	0.00191388
PPI	Increased	k__Bacteria|p__Firmicutes|c__Bacilli|o__Lactobacillales|f__Lactobacillaceae|g__Lactobacillus|s__salivarius	0.00242619493261397;0.00364103032058796;0.00499539113342873	345;1174;309	24;70;36	4.96608698722237E-4;6.40785206286023E-10;1.29613539943917E-4	0.0295127455240643;1.67548468675209E-7;0.0272682382672037	3.4825789845784394;6.1800568545358745;3.82719175900768	miSeqRuns_UMCG-IBD-TIFN_Taxman_100Pc_GG13-PPI.txt;miSeqRuns_UMCG-IBD-TIFN_Taxman_100Pc_GG13-Reducing_stomach_acid2.txt;miSeqRuns_UMCG-IBD-TIFN_Taxman_100Pc_GG13-ZICPPI.txt	1828	130	Increased	8.03912	9.04873e-16	2.62423e-14	1.24187e-05	0.000237248	1.09729e-05	0.000248045	2.98179e-05	0.000322724	3.28762e-06	0.000115728	2.36339e-05	1	115	44	15	19	17	17	83	8	0	0.84306
PPI	Increased	k__Bacteria|p__Firmicutes|c__Bacilli|o__Lactobacillales|f__Enterococcaceae	0.00405105291280834;0.00312981245193225;0.00427777260535246	345;1174;309	174;626;202	4.84425098470575E-8;3.28403142616908E-8;0.00423860031088027	1.29549112048131E-5;3.79420188958325E-6;0.181999055831586	5.456934444626558;5.525577728051331;2.8598360824529596	miSeqRuns_UMCG-IBD-TIFN_Taxman_100Pc_GG13-PPI.txt;miSeqRuns_UMCG-IBD-TIFN_Taxman_100Pc_GG13-Reducing_stomach_acid2.txt;miSeqRuns_UMCG-IBD-TIFN_Taxman_100Pc_GG13-ZICPPI.txt	1828	1002	Increased	7.97463	1.52844e-15	4.02967e-14	0.000513578	0.00349771	0.00033579	0.00518135	0.00157239	0.00329126	0.000291942	0.000472353	0.000168402	0	1117	160	133	71	148	51	836	38	59.1349	0.0865461
PPI	Increased	k__Bacteria|p__Firmicutes|c__Bacilli|o__Lactobacillales|f__Enterococcaceae|g__Enterococcus	0.0040671549239571;0.00307878344097191;0.00420656096071372	345;1174;309	172;621;202	3.73436523894487E-8;4.88906485535644E-8;0.00482532657429697	1.07549718881612E-5;5.39752760031351E-6;0.191197593567688	5.502974465911523;5.455298486655063;2.8184690301785107	miSeqRuns_UMCG-IBD-TIFN_Taxman_100Pc_GG13-PPI.txt;miSeqRuns_UMCG-IBD-TIFN_Taxman_100Pc_GG13-Reducing_stomach_acid2.txt;miSeqRuns_UMCG-IBD-TIFN_Taxman_100Pc_GG13-ZICPPI.txt	1828	995	Increased	7.9213	2.35045e-15	5.68047e-14	0.000504937	0.00345869	0.000328931	0.00511735	0.00155386	0.00326219	0.000284922	0.000470126	0.000160393	0	1109	159	131	70	148	51	830	38	61.8308	0.0728093
PPI	Increased	k__Bacteria|p__Firmicutes|c__Bacilli|o__Lactobacillales|f__Lactobacillaceae|g__Lactobacillus|s__acidipiscis	0.00222565017909873;0.00200812794452378;0.00301288884245778	345;1174;309	23;60;21	0.00152175579144539;2.27804232665108E-8;5.8637370938647E-4	0.0599731966649636;2.82932856970064E-6;0.0756989543536985	3.1705023934111756;5.589439106306666;3.4378401631775475	miSeqRuns_UMCG-IBD-TIFN_Taxman_100Pc_GG13-PPI.txt;miSeqRuns_UMCG-IBD-TIFN_Taxman_100Pc_GG13-Reducing_stomach_acid2.txt;miSeqRuns_UMCG-IBD-TIFN_Taxman_100Pc_GG13-ZICPPI.txt	1828	104	Increased	7.27015	3.59098e-13	8.01096e-12	6.74754e-06	0.000102897	6.19011e-06	6.965e-05	1.16847e-05	0.000150749	4.70388e-06	0.000111139	3.83803e-06	0	93	33	15	15	9	11	69	7	0	0.879136
PPI	Increased	k__Bacteria|p__Firmicutes|c__Bacilli|o__Lactobacillales|f__Streptococcaceae|g__Streptococcus|s__sobrinus	0.00187940947489305;0.0011298370233913;0.00113836302744061	345;1174;309	14;45;23	0.00109227317195664;3.68374580598932E-9;0.128040859947133	0.0481114206565371;7.70201778075821E-7;0.592102044139179	3.265613253816294;5.897802471970899;1.5218731823084881	miSeqRuns_UMCG-IBD-TIFN_Taxman_100Pc_GG13-PPI.txt;miSeqRuns_UMCG-IBD-TIFN_Taxman_100Pc_GG13-Reducing_stomach_acid2.txt;miSeqRuns_UMCG-IBD-TIFN_Taxman_100Pc_GG13-ZICPPI.txt	1828	82	Increased	6.77085	1.28026e-11	2.65206e-10	4.17096e-06	4.70109e-05	1.50855e-06	2.28177e-05	1.64183e-05	6.77978e-05	3.86124e-06	6.9519e-05	0.00085526	1	84	23	8	11	17	6	59	6	0	0.382902
PPI	Increased	k__Bacteria|p__Firmicutes|c__Bacilli|o__Lactobacillales|f__Streptococcaceae|g__Streptococcus|s__anginosus	0.00164116222104852;0.00278380779453112;0.00247578921209058	345;1174;309	154;524;162	0.013337696478106;2.94099464986151E-8;0.00379738649125528	0.250303730492205;3.47877652869333E-6;0.178789891035337	2.474622785555638;5.544913535922038;2.894520056759653	miSeqRuns_UMCG-IBD-TIFN_Taxman_100Pc_GG13-PPI.txt;miSeqRuns_UMCG-IBD-TIFN_Taxman_100Pc_GG13-Reducing_stomach_acid2.txt;miSeqRuns_UMCG-IBD-TIFN_Taxman_100Pc_GG13-ZICPPI.txt	1828	840	Increased	6.70877	1.96271e-11	3.79472e-10	5.95544e-05	0.000462939	5.7204e-05	0.000282628	6.01636e-05	0.000779191	6.77895e-05	0.000440895	0.000467723	1	945	132	123	65	120	37	702	30	0	0.886712
PPI	Increased	k__Bacteria|p__Actinobacteria|c__Actinobacteria|o__Actinomycetales|f__Actinomycetaceae|g__Actinomyces	0.00791718301294229;0.00534408515174314;0.00476020535358811	345;1174;309	335;1150;292	2.11944951894128E-5;1.90962295142188E-5;0.0166832675139601	0.00283400678532719;8.47054180594993E-4;0.317935412337469	4.251920660206803;4.275204074142886;2.393614624483312	miSeqRuns_UMCG-IBD-TIFN_Taxman_100Pc_GG13-PPI.txt;miSeqRuns_UMCG-IBD-TIFN_Taxman_100Pc_GG13-Reducing_stomach_acid2.txt;miSeqRuns_UMCG-IBD-TIFN_Taxman_100Pc_GG13-ZICPPI.txt	1828	1777	Increased	6.2574	3.91437e-10	7.09506e-09	0.000726104	0.00106319	0.000722309	0.00102409	0.000861424	0.00119255	0.000627375	0.000986919	0.0392728	1	2073	201	280	97	230	54	1563	50	31.7517	0.231023
PPI	Increased	k__Bacteria|p__Firmicutes|c__Clostridia|o__Clostridiales|f__Veillonellaceae|g__Veillonella	0.00617183657819793;0.00352556073497698;0.00507861712608607	345;1174;309	239;813;241	2.56584607171387E-5;1.56449965878248E-4;8.76309033827975E-4	0.00315576966982886;0.00457202017931258;0.0974871476024317	4.208928458128763;3.780601427298237;3.3274939136349615	miSeqRuns_UMCG-IBD-TIFN_Taxman_100Pc_GG13-PPI.txt;miSeqRuns_UMCG-IBD-TIFN_Taxman_100Pc_GG13-Reducing_stomach_acid2.txt;miSeqRuns_UMCG-IBD-TIFN_Taxman_100Pc_GG13-ZICPPI.txt	1828	1293	Increased	6.22631	4.77541e-10	8.14661e-09	0.000877189	0.0028278	0.000247115	0.000946259	0.0044206	0.00790282	0.000266001	0.000509578	0	0	1501	159	195	70	184	50	1122	39	53.6315	0.115714
PPI	Increased	k__Bacteria|p__Actinobacteria|c__Actinobacteria|o__Actinomycetales|f__Actinomycetaceae	0.00817311772531496;0.00533740854259538;0.00544214649095839	345;1174;309	337;1156;294	1.7855139554732E-5;5.59040408634273E-5;0.0110406983216319	0.00247591268492283;0.00192868940978824;0.271072850816999	4.290151346390656;4.029464568373353;2.5414080475425016	miSeqRuns_UMCG-IBD-TIFN_Taxman_100Pc_GG13-PPI.txt;miSeqRuns_UMCG-IBD-TIFN_Taxman_100Pc_GG13-Reducing_stomach_acid2.txt;miSeqRuns_UMCG-IBD-TIFN_Taxman_100Pc_GG13-ZICPPI.txt	1828	1787	Increased	6.13784	8.36494e-10	1.34774e-08	0.000833764	0.0011315	0.000841196	0.00111147	0.000986931	0.00123531	0.00067839	0.00104826	0.0426583	1	2084	203	282	98	231	55	1571	50	41.6505	0.180178
PPI	Increased	k__Bacteria|p__Firmicutes|c__Clostridia|o__Clostridiales|f__Clostridiaceae|g__Clostridium|s__perfringens	0.00259817938847497;0.00973059842761852;9.91508437368153E-5	345;1174;309	48;177;115	0.00915451487837681;1.89580595388229E-9;0.815838918349359	0.20647291388339;4.70918198944361E-7;0.933577517378063	2.6062293186595227;6.006491769175681;0.23290018040714688	miSeqRuns_UMCG-IBD-TIFN_Taxman_100Pc_GG13-PPI.txt;miSeqRuns_UMCG-IBD-TIFN_Taxman_100Pc_GG13-Reducing_stomach_acid2.txt;miSeqRuns_UMCG-IBD-TIFN_Taxman_100Pc_GG13-ZICPPI.txt	1828	340	Increased	6.04155	1.52642e-09	2.32989e-08	0.000197181	0.00142766	0.000113973	0.00152258	0.000777743	0.00235506	2.25532e-05	0.00015234	1.57602e-05	0	397	68	38	32	88	26	271	10	68.8683	0.0402697
PPI	Increased	k__Bacteria|p__Firmicutes|c__Clostridia|o__Clostridiales|f__Veillonellaceae|g__Veillonella|s__dispar	0.00376041783443368;0.00329934358946385;0.00386419067777241	345;1174;309	199;717;216	9.04773553554989E-4;2.27017717577101E-5;0.00453540920126229	0.0418206442532084;9.63952154635075E-4;0.184292490311721	3.3185770559228502;4.236513064619049;2.8383031003066974	miSeqRuns_UMCG-IBD-TIFN_Taxman_100Pc_GG13-PPI.txt;miSeqRuns_UMCG-IBD-TIFN_Taxman_100Pc_GG13-Reducing_stomach_acid2.txt;miSeqRuns_UMCG-IBD-TIFN_Taxman_100Pc_GG13-ZICPPI.txt	1828	1132	Increased	6.00375	1.92807e-09	2.79581e-08	0.00045283	0.00158634	0.000156663	0.000643404	0.00213192	0.00425561	0.000154278	0.000276419	0	0	1298	148	162	67	162	48	974	33	0	0.615112
PPI	Increased	k__Bacteria|p__Actinobacteria|c__Actinobacteria|o__Bifidobacteriales|f__Bifidobacteriaceae|g__Alloscardovia	0.00317322281639684;0.00211959034132806;1.39299442033897E-5	345;1174;309	84;346;102	2.08251971416172E-4;1.41345052082726E-7;0.982346150550535	0.0164032673453324;1.2767313068127E-5;0.992066303856681	3.7087900989476474;5.263491491445086;0.022127624691797403	miSeqRuns_UMCG-IBD-TIFN_Taxman_100Pc_GG13-PPI.txt;miSeqRuns_UMCG-IBD-TIFN_Taxman_100Pc_GG13-Reducing_stomach_acid2.txt;miSeqRuns_UMCG-IBD-TIFN_Taxman_100Pc_GG13-ZICPPI.txt	1828	532	Increased	5.83844	5.2691e-09	7.27666e-08	3.00408e-05	0.000153934	2.61363e-05	0.000187062	5.51943e-05	0.000142248	2.3589e-05	0.000103374	0.000146981	1	590	81	64	44	80	18	446	19	72.8723	0.0250653
PPI	Increased	k__Bacteria|p__Firmicutes|c__Clostridia|o__Clostridiales|f__Veillonellaceae|g__Veillonella|s__parvula	0.00325015854633754;0.00135251864636598;0.00210106462581198	345;1174;309	145;413;149	3.20760733837158E-5;0.0015449546317241;0.00579346321936583	0.00375290058589474;0.0282090641654165;0.205573443486304	4.158203133239619;3.166104155885814;2.7592475384162323	miSeqRuns_UMCG-IBD-TIFN_Taxman_100Pc_GG13-PPI.txt;miSeqRuns_UMCG-IBD-TIFN_Taxman_100Pc_GG13-Reducing_stomach_acid2.txt;miSeqRuns_UMCG-IBD-TIFN_Taxman_100Pc_GG13-ZICPPI.txt	1828	707	Increased	5.47819	4.29694e-08	5.66437e-07	0.000142517	0.000505184	4.12996e-05	0.000149415	0.000682686	0.0013916	6.85629e-05	0.000152954	0	0	809	115	115	50	108	38	586	27	59.3308	0.085532
PPI	Increased	k__Bacteria|p__Firmicutes|c__Bacilli|o__Lactobacillales|f__Lactobacillaceae|g__Lactobacillus	0.00475048772454091;0.00593649894646388;0.0193120144885943	345;1174;309	258;938;274	0.0138412499450992;0.00480629519980672;3.0692424575224E-6	0.250303730492205;0.0595453230739147;0.00136478981277829	2.4613571632548314;2.819737480703562;4.666130878844405	miSeqRuns_UMCG-IBD-TIFN_Taxman_100Pc_GG13-PPI.txt;miSeqRuns_UMCG-IBD-TIFN_Taxman_100Pc_GG13-Reducing_stomach_acid2.txt;miSeqRuns_UMCG-IBD-TIFN_Taxman_100Pc_GG13-ZICPPI.txt	1828	1470	Increased	5.24745	1.54218e-07	1.94457e-06	0.003009	0.015492	0.00224657	0.0063056	0.00773159	0.034688	0.00190684	0.0107408	0.00422727	1	1677	195	206	89	208	59	1263	47	75.7465	0.0161939
PPI	Increased	k__Bacteria|p__Firmicutes|c__Bacilli|o__Lactobacillales|f__Lactobacillaceae	0.00504109736322007;0.0060689234234752;0.0180982525978897	345;1174;309	264;945;277	0.0111763607081883;0.00402518141704115;1.0109179424676E-5	0.227175538357871;0.0520757845829699;0.00367790327795939	2.537135748227125;2.876181535820197;4.414824874570131	miSeqRuns_UMCG-IBD-TIFN_Taxman_100Pc_GG13-PPI.txt;miSeqRuns_UMCG-IBD-TIFN_Taxman_100Pc_GG13-Reducing_stomach_acid2.txt;miSeqRuns_UMCG-IBD-TIFN_Taxman_100Pc_GG13-ZICPPI.txt	1828	1486	Increased	5.22228	1.76731e-07	2.13558e-06	0.00311419	0.0155767	0.00228985	0.00633329	0.00819067	0.0349064	0.00194716	0.0107791	0.00422727	1	1700	196	211	89	211	59	1278	48	71.1313	0.0313056
PPI	Increased	k__Bacteria|p__Firmicutes|c__Clostridia|o__Clostridiales|f__Lachnospiraceae|g__Oribacterium	9.2001774939405E-4;6.92747681294285E-4;6.7464965747458E-4	345;1174;309	51;111;35	0.00433172595229749;1.93252797037061E-4;0.0294706582246529	0.126273498174245;0.00539370727910179;0.38527629948432	2.852936623898906;3.7276770463262174;2.1771328294060903	miSeqRuns_UMCG-IBD-TIFN_Taxman_100Pc_GG13-PPI.txt;miSeqRuns_UMCG-IBD-TIFN_Taxman_100Pc_GG13-Reducing_stomach_acid2.txt;miSeqRuns_UMCG-IBD-TIFN_Taxman_100Pc_GG13-ZICPPI.txt	1828	197	Increased	5.12185	3.02549e-07	3.5097e-06	4.23574e-06	9.51005e-06	2.76332e-06	8.71769e-06	1.14449e-05	1.02556e-05	3.7009e-06	1.01711e-05	0.00396852	1	221	40	39	18	25	11	157	11	0	0.762861
PPI	Increased	k__Bacteria|p__Firmicutes|c__Bacilli|o__Lactobacillales|f__Aerococcaceae	0.00258544834025428;0.00130592467723637;0.00176783008647287	345;1174;309	173;450;128	1.61444369451157E-4;0.00229526882694815;0.0356745478119392	0.0134321715383363;0.0354242187051263;0.404852742722411	3.772771135130241;3.0491015478912327;2.100617599944605	miSeqRuns_UMCG-IBD-TIFN_Taxman_100Pc_GG13-PPI.txt;miSeqRuns_UMCG-IBD-TIFN_Taxman_100Pc_GG13-Reducing_stomach_acid2.txt;miSeqRuns_UMCG-IBD-TIFN_Taxman_100Pc_GG13-ZICPPI.txt	1828	751	Increased	4.94619	7.5679e-07	8.42028e-06	3.24492e-05	6.50628e-05	2.56887e-05	4.78167e-05	6.20265e-05	0.000102718	3.29315e-05	5.42407e-05	0.00619333	1	873	107	139	45	95	31	639	31	42.5055	0.175644
PPI	Increased	k__Bacteria|p__Firmicutes|c__Bacilli|o__Lactobacillales|f__Carnobacteriaceae|g__Granulicatella	0.00156252030828407;0.00182928976963489;0.00383973114961142	345;1174;309	200;535;205	0.0660839320471879;5.05953162399839E-4;9.90371977255079E-4	0.467015096211667;0.0121974970041072;0.0990867163243707	1.8378539316188616;3.4775847038900087;3.293247655602474	miSeqRuns_UMCG-IBD-TIFN_Taxman_100Pc_GG13-PPI.txt;miSeqRuns_UMCG-IBD-TIFN_Taxman_100Pc_GG13-Reducing_stomach_acid2.txt;miSeqRuns_UMCG-IBD-TIFN_Taxman_100Pc_GG13-ZICPPI.txt	1828	940	Increased	4.93933	7.83927e-07	8.42028e-06	6.31122e-05	0.00012964	3.76745e-05	7.71457e-05	0.000191662	0.000256767	5.05349e-05	8.19775e-05	0.016504	1	1119	130	163	52	155	46	801	32	0	0.382925
PPI	Increased	k__Bacteria|p__Firmicutes|c__Bacilli|o__Bacillales|f__Staphylococcaceae|g__Staphylococcus|s__aureus	4.11293183329104E-5;8.9423944341082E-4;7.37553305029336E-4	345;1174;309	7;50;22	0.675760704652703;1.82318597142122E-6;0.026699911040411	0.955415448483902;1.17591900383635E-4;0.384363467567355	0.4182549758930163;4.772095959678503;2.2158772347936226	miSeqRuns_UMCG-IBD-TIFN_Taxman_100Pc_GG13-PPI.txt;miSeqRuns_UMCG-IBD-TIFN_Taxman_100Pc_GG13-Reducing_stomach_acid2.txt;miSeqRuns_UMCG-IBD-TIFN_Taxman_100Pc_GG13-ZICPPI.txt	1828	79	Increased	4.91707	8.78492e-07	9.09902e-06	1.63e-06	1.30465e-05	1.59075e-06	1.96411e-05	3.3032e-06	1.28818e-05	3.80692e-07	4.39216e-07	0.000562623	1	79	20	6	11	14	8	59	1	45.6577	0.158788
PPI	Increased	k__Bacteria|p__Firmicutes|c__Bacilli|o__Bacillales|f__Staphylococcaceae|g__Staphylococcus|[s__aureus/s__epidermidis]	3.20566022802824E-4;0.00108096350315635;0.00187940896802272	345;1174;309	19;101;29	0.140923346091478;1.75860255295869E-4;0.00211412655768536	0.648885362220833;0.00502111349603378;0.149493292467605	1.4723612696019515;3.751385224269215;3.0737130743628085	miSeqRuns_UMCG-IBD-TIFN_Taxman_100Pc_GG13-PPI.txt;miSeqRuns_UMCG-IBD-TIFN_Taxman_100Pc_GG13-Reducing_stomach_acid2.txt;miSeqRuns_UMCG-IBD-TIFN_Taxman_100Pc_GG13-ZICPPI.txt	1828	149	Increased	4.90971	9.12123e-07	9.12158e-06	6.0793e-06	2.45244e-05	6.49432e-06	1.86924e-05	9.53633e-06	5.28647e-05	1.65271e-06	2.50392e-06	0.00110091	1	144	34	13	19	18	11	113	4	0	0.453114
PPI	Increased	k__Bacteria|p__Firmicutes|c__Bacilli|o__Lactobacillales|f__Carnobacteriaceae	0.00164145284185405;0.00177065290055651;0.00393219061827284	345;1174;309	204;549;205	0.0556794741049925;9.3234652411145E-4;8.01289201514758E-4	0.43339698762805;0.019299573049107;0.0971745268018806	1.913535963116835;3.310184023297929;3.352349063799479	miSeqRuns_UMCG-IBD-TIFN_Taxman_100Pc_GG13-PPI.txt;miSeqRuns_UMCG-IBD-TIFN_Taxman_100Pc_GG13-Reducing_stomach_acid2.txt;miSeqRuns_UMCG-IBD-TIFN_Taxman_100Pc_GG13-ZICPPI.txt	1828	958	Increased	4.86235	1.16e-06	1.12137e-05	6.48212e-05	0.000132214	3.94626e-05	7.88438e-05	0.00019397	0.000258519	5.14497e-05	8.72208e-05	0.0165158	1	1140	131	167	53	155	46	818	32	9.69548	0.330429
PPI	Increased	k__Bacteria|p__Firmicutes|c__Bacilli|o__Lactobacillales|f__Lactobacillaceae|g__Lactobacillus|s__zeae	0.00333283467121799;0.00253087537133142;0.00437407327171304	345;1174;309	83;232;90	0.0104204087857497;0.00157104151440319;0.0280494962501189	0.225514511525126;0.0284851614728287;0.38527629948432	2.561557175073718;3.1612304473002366;2.1965934246975483	miSeqRuns_UMCG-IBD-TIFN_Taxman_100Pc_GG13-PPI.txt;miSeqRuns_UMCG-IBD-TIFN_Taxman_100Pc_GG13-Reducing_stomach_acid2.txt;miSeqRuns_UMCG-IBD-TIFN_Taxman_100Pc_GG13-ZICPPI.txt	1828	405	Increased	4.54932	5.3819e-06	5.03487e-05	7.18761e-05	0.000201253	5.531e-05	0.00013095	0.000147586	0.00039254	7.03615e-05	0.000112679	3.92105e-05	0	436	88	59	38	62	27	315	23	0	0.710475
PPI	Increased	k__Bacteria|p__Firmicutes|c__Clostridia|o__Clostridiales|f__Veillonellaceae|g__Veillonella|[s__parvula/s__dispar]	4.7967681584869E-4;6.65584710744717E-4;0.00157548143064552	345;1174;309	29;80;41	0.0554262682802551;1.81361819040036E-4;0.137143893908361	0.43339698762805;0.00511934952835737;0.597522184669366	1.915519629165102;3.7436561307392813;1.4865114372422716	miSeqRuns_UMCG-IBD-TIFN_Taxman_100Pc_GG13-PPI.txt;miSeqRuns_UMCG-IBD-TIFN_Taxman_100Pc_GG13-Reducing_stomach_acid2.txt;miSeqRuns_UMCG-IBD-TIFN_Taxman_100Pc_GG13-ZICPPI.txt	1828	150	Increased	4.44347	8.8519e-06	8.02234e-05	1.01383e-05	2.01005e-05	2.32637e-06	9.21504e-06	5.44957e-05	5.02953e-05	2.20652e-06	5.70792e-06	0	0	167	32	23	13	27	14	117	5	0	0.927996
PPI	Increased	k__Bacteria|p__Firmicutes|c__Bacilli|o__Bacillales	0.00102005569890762;0.00169104120445722;0.00251869314518758	345;1174;309	177;650;162	0.173756624396802;0.00177389003261326;0.00239224178231939	0.684630929797919;0.0310467772056662;0.149493292467605	1.360231667381604;3.1256890621192652;3.036648577733127	miSeqRuns_UMCG-IBD-TIFN_Taxman_100Pc_GG13-PPI.txt;miSeqRuns_UMCG-IBD-TIFN_Taxman_100Pc_GG13-Reducing_stomach_acid2.txt;miSeqRuns_UMCG-IBD-TIFN_Taxman_100Pc_GG13-ZICPPI.txt	1828	989	Increased	4.34433	1.39703e-05	0.000122774	7.51993e-05	0.000322264	7.67577e-05	0.000531406	0.000107351	0.000213635	4.25908e-05	4.40818e-05	0.00878513	1	1113	134	144	65	120	41	849	28	0	0.373772
PPI	Increased	k__Bacteria|p__Actinobacteria|c__Actinobacteria|o__Bifidobacteriales|f__Bifidobacteriaceae|g__Scardovia	0.00160148663694925;9.80209744287814E-4;8.8024214527214E-4	345;1174;309	89;337;114	5.09788314978841E-4;0.00507763383191931;0.190297181186585	0.029643342138113;0.0621237495747157;0.656654020491252	3.475559803080487;2.8020669291706017;1.309700479879639	miSeqRuns_UMCG-IBD-TIFN_Taxman_100Pc_GG13-PPI.txt;miSeqRuns_UMCG-IBD-TIFN_Taxman_100Pc_GG13-Reducing_stomach_acid2.txt;miSeqRuns_UMCG-IBD-TIFN_Taxman_100Pc_GG13-ZICPPI.txt	1828	540	Increased	4.29392	1.75543e-05	0.000149733	2.33745e-05	0.000115279	1.94658e-05	6.24213e-05	5.00002e-05	0.000248131	1.57104e-05	6.15881e-05	0.000661753	1	601	85	65	38	86	24	450	23	37.668	0.201028
PPI	Increased	k__Bacteria|p__Firmicutes|c__Bacilli|o__Bacillales|f__Staphylococcaceae	4.16233807571007E-4;0.00115569862069004;0.00145863250679473	345;1174;309	78;312;85	0.237146390941911;0.00100553332510374;0.00690916081454478	0.742863051356568;0.0203897533025118;0.21512430054046	1.1821494883131414;3.288973942527102;2.7011911924935523	miSeqRuns_UMCG-IBD-TIFN_Taxman_100Pc_GG13-PPI.txt;miSeqRuns_UMCG-IBD-TIFN_Taxman_100Pc_GG13-Reducing_stomach_acid2.txt;miSeqRuns_UMCG-IBD-TIFN_Taxman_100Pc_GG13-ZICPPI.txt	1828	475	Increased	4.2599	2.04521e-05	0.000169466	4.01347e-05	0.000239301	4.71271e-05	0.000422256	3.84257e-05	0.000123256	1.55498e-05	2.06761e-05	0.00850033	1	523	73	63	37	61	24	399	12	0	0.50547
PPI	Increased	k__Bacteria|p__Firmicutes|c__Clostridia|o__Clostridiales|f__Peptostreptococcaceae|g__Clostridium|s__sordellii	4.42662675450797E-4;3.46448558225039E-4;3.77159701125519E-6	345;1174;309	4;12;17	0.00821244551634155;1.22068555322712E-4;0.991220881189657	0.192171225082392;0.00372046983339408;0.99583581397349	2.6432084637012587;3.8419342178656564;0.011003215742085808	miSeqRuns_UMCG-IBD-TIFN_Taxman_100Pc_GG13-PPI.txt;miSeqRuns_UMCG-IBD-TIFN_Taxman_100Pc_GG13-Reducing_stomach_acid2.txt;miSeqRuns_UMCG-IBD-TIFN_Taxman_100Pc_GG13-ZICPPI.txt	1828	33	Increased	4.23172	2.31912e-05	0.000186825	1.00415e-06	5.94339e-06	3.29914e-07	4.80755e-06	5.03693e-06	7.22433e-06	1.49135e-07	6.64127e-06	0	0	40	9	2	4	14	3	24	2	47.9124	0.14663
PPI	Increased	k__Bacteria|p__Firmicutes|c__Bacilli|o__Bacillales|f__Staphylococcaceae|g__Staphylococcus	4.46913318739717E-4;0.0010846892564927;0.00145863250679473	345;1174;309	77;310;85	0.203247726189892;0.00148539128068732;0.00690916081454482	0.705204500290218;0.0273311995646466;0.21512430054046	1.272352997618464;3.1775225700288936;2.7011911924935506	miSeqRuns_UMCG-IBD-TIFN_Taxman_100Pc_GG13-PPI.txt;miSeqRuns_UMCG-IBD-TIFN_Taxman_100Pc_GG13-Reducing_stomach_acid2.txt;miSeqRuns_UMCG-IBD-TIFN_Taxman_100Pc_GG13-ZICPPI.txt	1828	472	Increased	4.20977	2.55632e-05	0.000200368	3.99859e-05	0.000239116	4.692e-05	0.000421864	3.84257e-05	0.000123256	1.54941e-05	2.06761e-05	0.00688351	1	519	73	62	37	61	24	396	12	0	0.524711
PPI	Increased	k__Bacteria|p__Actinobacteria|c__Coriobacteriia|o__Coriobacteriales|f__Coriobacteriaceae|g__Atopobium	0.0016626626167776;0.00130207777359621;0.00251426078725722	345;1174;309	170;648;169	0.0181020672530848;0.0130130869385805;0.00510784727571058	0.266773182459219;0.126762776295819;0.196553892282632	2.363523731267498;2.483410941180836;2.800152480269575	miSeqRuns_UMCG-IBD-TIFN_Taxman_100Pc_GG13-PPI.txt;miSeqRuns_UMCG-IBD-TIFN_Taxman_100Pc_GG13-Reducing_stomach_acid2.txt;miSeqRuns_UMCG-IBD-TIFN_Taxman_100Pc_GG13-ZICPPI.txt	1828	987	Increased	4.16824	3.06963e-05	0.00023427	6.0325e-05	8.02731e-05	4.7951e-05	8.04535e-05	0.000151555	9.86547e-05	3.02751e-05	5.82976e-05	0.00239664	1	1118	125	136	58	128	37	854	30	9.91886	0.329523
PPI	Increased	k__Bacteria|p__Firmicutes|c__Bacilli|o__Bacillales|f__Planococcaceae	8.60570966275911E-4;0.00100742492619607;0.0015597067277062	345;1174;309	110;353;95	0.0934624761387437;0.00323714284977547;0.0105339613546395	0.540910403871239;0.044922138764482;0.263185929158237	1.6774092789788035;2.9442730307472647;2.557790233498153	miSeqRuns_UMCG-IBD-TIFN_Taxman_100Pc_GG13-PPI.txt;miSeqRuns_UMCG-IBD-TIFN_Taxman_100Pc_GG13-Reducing_stomach_acid2.txt;miSeqRuns_UMCG-IBD-TIFN_Taxman_100Pc_GG13-ZICPPI.txt	1828	558	Increased	4.13985	3.47525e-05	0.000258426	1.78394e-05	6.21507e-05	1.71926e-05	8.64009e-05	2.06748e-05	5.92284e-05	1.78808e-05	1.85147e-05	9.09209e-05	1	618	91	88	43	66	28	464	20	0	0.641999
PPI	Decreased	k__Bacteria|p__Firmicutes|c__Clostridia	-0.0537020107243279;-0.0311600855168867;-0.0440907459756301	345;1174;309	345;1174;309	0.00488592112804753;0.013394347350567;0.0253058249257987	0.133320267419309;0.129209937160421;0.377887728929278	-2.8144603058750377;-2.47310849269257;-2.236701973736693	miSeqRuns_UMCG-IBD-TIFN_Taxman_100Pc_GG13-PPI.txt;miSeqRuns_UMCG-IBD-TIFN_Taxman_100Pc_GG13-Reducing_stomach_acid2.txt;miSeqRuns_UMCG-IBD-TIFN_Taxman_100Pc_GG13-ZICPPI.txt	1828	1828	Decreased	-4.12422	3.71985e-05	0.000266531	0.689496	0.640766	0.694073	0.659571	0.646572	0.593229	0.708266	0.66019	0.0799441	0	2135	210	289	99	241	60	1605	51	1.52909	0.362211
PPI	Decreased	k__Bacteria|p__Firmicutes|c__Clostridia|o__Clostridiales	-0.0536697010180339;-0.0311335302934979;-0.044020240833191	345;1174;309	345;1174;309	0.0049140483183399;0.0134376314845727;0.025503546045513	0.133320267419309;0.129376265921235;0.379424502877855	-2.8126147720562713;-2.4719553062447126;-2.233688957952247	miSeqRuns_UMCG-IBD-TIFN_Taxman_100Pc_GG13-PPI.txt;miSeqRuns_UMCG-IBD-TIFN_Taxman_100Pc_GG13-Reducing_stomach_acid2.txt;miSeqRuns_UMCG-IBD-TIFN_Taxman_100Pc_GG13-ZICPPI.txt	1828	1828	Decreased	-4.12126	3.76805e-05	0.000266531	0.689362	0.64067	0.693912	0.659415	0.646484	0.593193	0.708191	0.660137	0.0799441	0	2135	210	289	99	241	60	1605	51	1.28064	0.363138
PPI	Increased	k__Bacteria|p__Firmicutes|c__Bacilli|o__Bacillales|f__Staphylococcaceae|g__Staphylococcus|s__epidermidis	2.9807098353611E-4;0.00138931371185137;4.48045538881939E-4	345;1174;309	9;61;28	0.0885359783760427;0.00117223684353279;0.136815448816203	0.527832329681376;0.0229278450341373;0.597522184669366	1.7031715006758588;3.24555071074384;1.4877552587104461	miSeqRuns_UMCG-IBD-TIFN_Taxman_100Pc_GG13-PPI.txt;miSeqRuns_UMCG-IBD-TIFN_Taxman_100Pc_GG13-Reducing_stomach_acid2.txt;miSeqRuns_UMCG-IBD-TIFN_Taxman_100Pc_GG13-ZICPPI.txt	1828	98	Increased	3.95255	7.73217e-05	0.000533908	1.90516e-06	8.24375e-05	1.94498e-06	0.00016699	3.4171e-06	8.32288e-06	4.96228e-07	5.49912e-06	0.000466261	1	103	20	7	8	18	10	78	2	0	0.987513
PPI	Increased	k__Bacteria|p__Proteobacteria|c__Gammaproteobacteria	0.00297126940687023;0.00896225664494471;0.0190370957968607	345;1174;309	310;1043;288	0.414660344980831;0.00127998306813156;0.0148832610256398	0.869236942573397;0.0243638156416766;0.300471384634207	0.8157199170036021;3.2204303152812743;2.435207284096007	miSeqRuns_UMCG-IBD-TIFN_Taxman_100Pc_GG13-PPI.txt;miSeqRuns_UMCG-IBD-TIFN_Taxman_100Pc_GG13-Reducing_stomach_acid2.txt;miSeqRuns_UMCG-IBD-TIFN_Taxman_100Pc_GG13-ZICPPI.txt	1828	1641	Increased	3.93642	8.27056e-05	0.000557803	0.00485353	0.0108488	0.00346479	0.00915723	0.0128218	0.0209643	0.00337442	0.00223181	0	0	1924	188	260	85	223	58	1441	45	0	0.479172
PPI	Increased	k__Bacteria|p__Proteobacteria|c__Gammaproteobacteria|o__Pasteurellales|f__Pasteurellaceae|g__Haemophilus|s__parainfluenzae	0.00316848518502328;0.00214404774749235;0.00312091133932073	345;1174;309	188;607;161	0.0175781494595738;0.0324393113060577;0.00953222174780552	0.266447739176697;0.224439260671358;0.249333015913188	2.374386292338847;2.1389550211217094;2.5923518839840916	miSeqRuns_UMCG-IBD-TIFN_Taxman_100Pc_GG13-PPI.txt;miSeqRuns_UMCG-IBD-TIFN_Taxman_100Pc_GG13-Reducing_stomach_acid2.txt;miSeqRuns_UMCG-IBD-TIFN_Taxman_100Pc_GG13-ZICPPI.txt	1828	956	Increased	3.81148	0.000138139	0.000910496	0.000537563	0.00143402	0.000403812	0.00102627	0.00135014	0.00311745	0.000357467	0.000245019	0	0	1113	114	156	50	122	36	835	28	16.8666	0.300326
PPI	Increased	k__Bacteria|p__Proteobacteria|c__Gammaproteobacteria|o__Pasteurellales|f__Pasteurellaceae|g__Haemophilus	0.00316848518502328;0.00213170671086439;0.00302912986715833	345;1174;309	188;608;162	0.0175781494595738;0.0334309132145515;0.0138847579102993	0.266447739176697;0.22845223775776;0.300471384634207	2.374386292338847;2.126869673964705;2.4602310932413194	miSeqRuns_UMCG-IBD-TIFN_Taxman_100Pc_GG13-PPI.txt;miSeqRuns_UMCG-IBD-TIFN_Taxman_100Pc_GG13-Reducing_stomach_acid2.txt;miSeqRuns_UMCG-IBD-TIFN_Taxman_100Pc_GG13-ZICPPI.txt	1828	958	Increased	3.74747	0.000178626	0.00115119	0.000575142	0.0014341	0.000403974	0.00102627	0.00159914	0.00311774	0.000357913	0.000245019	0	0	1116	114	156	50	123	36	837	28	7.85451	0.337821
PPI	Increased	k__Bacteria|p__Firmicutes|c__Bacilli|o__Lactobacillales|f__Streptococcaceae|g__Streptococcus|s__luteciae	0.00500708362417942;0.00461141344712692;0.00119753592372946	345;1174;309	45;134;94	0.0468976838095128;0.0208901251761774;0.0134096405324676	0.401561489086626;0.169305948823764;0.29579925019209	1.9872230572247538;2.3099643992116;2.4727006722622002	miSeqRuns_UMCG-IBD-TIFN_Taxman_100Pc_GG13-PPI.txt;miSeqRuns_UMCG-IBD-TIFN_Taxman_100Pc_GG13-Reducing_stomach_acid2.txt;miSeqRuns_UMCG-IBD-TIFN_Taxman_100Pc_GG13-ZICPPI.txt	1828	273	Increased	3.73113	0.00019062	0.00120178	0.000591847	0.00444448	0.000232598	0.00151833	0.00289631	0.0116786	6.44042e-06	0.00161387	1.66259e-06	0	327	47	40	17	65	25	222	5	0	0.477619
PPI	Increased	k__Bacteria|p__Proteobacteria|c__Gammaproteobacteria|o__Pasteurellales	0.00298305852826898;0.00213215440945441;0.00311613237867599	345;1174;309	193;614;164	0.0272635688406997;0.0350312564996303;0.0121705589923393	0.309317581029029;0.236140138792624;0.28026740025959	2.2077232820131854;2.107996912490396;2.5071600483528638	miSeqRuns_UMCG-IBD-TIFN_Taxman_100Pc_GG13-PPI.txt;miSeqRuns_UMCG-IBD-TIFN_Taxman_100Pc_GG13-Reducing_stomach_acid2.txt;miSeqRuns_UMCG-IBD-TIFN_Taxman_100Pc_GG13-ZICPPI.txt	1828	971	Increased	3.67924	0.000233932	0.00141339	0.000585298	0.00145146	0.000411616	0.00103743	0.00162092	0.00315777	0.000367733	0.000247751	0	0	1135	115	161	51	125	36	849	28	3.22997	0.355803
PPI	Increased	k__Bacteria|p__Proteobacteria|c__Gammaproteobacteria|o__Pasteurellales|f__Pasteurellaceae	0.00298305852826898;0.00213215440945441;0.00311613237867599	345;1174;309	193;614;164	0.0272635688406997;0.0350312564996303;0.0121705589923393	0.309317581029029;0.236140138792624;0.28026740025959	2.2077232820131854;2.107996912490396;2.5071600483528638	miSeqRuns_UMCG-IBD-TIFN_Taxman_100Pc_GG13-PPI.txt;miSeqRuns_UMCG-IBD-TIFN_Taxman_100Pc_GG13-Reducing_stomach_acid2.txt;miSeqRuns_UMCG-IBD-TIFN_Taxman_100Pc_GG13-ZICPPI.txt	1828	971	Increased	3.67924	0.000233932	0.00141339	0.000585298	0.00145146	0.000411616	0.00103743	0.00162092	0.00315777	0.000367733	0.000247751	0	0	1135	115	161	51	125	36	849	28	3.22997	0.355803
PPI	Increased	k__Bacteria|p__Firmicutes|c__Clostridia|o__Clostridiales|f__Eubacteriaceae|g__Pseudoramibacter_Eubacterium	7.67400257788073E-4;0.00219653815902862;0.00404930910925241	345;1174;309	61;146;44	0.458857447155056;0.00205190411874384;0.0324363235975889	0.889539186148404;0.0333114072365711;0.398373776827212	0.7407295357882029;3.0826150278216304;2.138991909693315	miSeqRuns_UMCG-IBD-TIFN_Taxman_100Pc_GG13-PPI.txt;miSeqRuns_UMCG-IBD-TIFN_Taxman_100Pc_GG13-Reducing_stomach_acid2.txt;miSeqRuns_UMCG-IBD-TIFN_Taxman_100Pc_GG13-ZICPPI.txt	1828	251	Increased	3.67161	0.000241025	0.00142653	3.67874e-05	0.000300753	3.32341e-05	0.000192711	3.72207e-05	0.000698075	4.96435e-05	4.30452e-05	1.60763e-05	0	284	43	46	16	31	12	207	15	0	0.563904
PPI	Increased	k__Bacteria|p__Firmicutes|c__Bacilli|o__Lactobacillales|f__Lactobacillaceae|g__Lactobacillus|s__reuteri	0.00524750275655301;0.00235669662170901;0.00237344375567177	345;1174;309	26;103;55	0.00646357930774042;0.00881743872049272;0.383693094901062	0.162413697504565;0.0948160942930905;0.792529113982617	2.7232874448825735;2.61905245744466;0.8711118308978537	miSeqRuns_UMCG-IBD-TIFN_Taxman_100Pc_GG13-PPI.txt;miSeqRuns_UMCG-IBD-TIFN_Taxman_100Pc_GG13-Reducing_stomach_acid2.txt;miSeqRuns_UMCG-IBD-TIFN_Taxman_100Pc_GG13-ZICPPI.txt	1828	184	Increased	3.64012	0.000272506	0.0015806	8.13559e-05	0.000499351	6.87422e-05	8.36933e-05	0.000232094	0.000786973	2.57351e-06	0.000967837	0.000348168	1	187	49	17	24	37	16	133	9	0	0.409823
PPI	Increased	k__Bacteria|p__Proteobacteria|c__Gammaproteobacteria|o__Enterobacteriales|f__Enterobacteriaceae|g__Serratia	-3.50019979281018E-4;0.00191834083703109;-0.00128199232885034	345;1174;309	21;54;32	0.545434659511844;4.69884230739822E-7;0.653200005722226	0.92759973542807;3.48415650494841E-5;0.883666329889024	-0.6046152680209443;5.0382187540074295;-0.4493211459037535	miSeqRuns_UMCG-IBD-TIFN_Taxman_100Pc_GG13-PPI.txt;miSeqRuns_UMCG-IBD-TIFN_Taxman_100Pc_GG13-Reducing_stomach_acid2.txt;miSeqRuns_UMCG-IBD-TIFN_Taxman_100Pc_GG13-ZICPPI.txt	1828	107	Increased	3.5902	0.000330426	0.00187897	7.04516e-05	5.93234e-05	4.25824e-06	0.000106377	0.000431239	3.10363e-05	1.58085e-05	1.26275e-06	0	0	128	22	20	14	24	7	84	1	84.6879	0.00145786
PPI	Decreased	k__Bacteria|p__Firmicutes|c__Clostridia|o__Clostridiales|f__Ruminococcaceae	-0.0393513129973214;-0.0216002674859331;-0.0438401271290337	345;1174;309	345;1174;309	0.0457087630011456;0.0150612702610536;0.091073854455553	0.396142612676596;0.138118364947135;0.542154774116346	-1.9980728472219778;-2.4309024195882536;-1.689760129379727	miSeqRuns_UMCG-IBD-TIFN_Taxman_100Pc_GG13-PPI.txt;miSeqRuns_UMCG-IBD-TIFN_Taxman_100Pc_GG13-Reducing_stomach_acid2.txt;miSeqRuns_UMCG-IBD-TIFN_Taxman_100Pc_GG13-ZICPPI.txt	1828	1828	Decreased	-3.51087	0.000446649	0.00249102	0.242417	0.203251	0.252813	0.230679	0.190377	0.153956	0.247142	0.208005	0.00182004	0	2133	210	289	99	240	60	1604	51	0	0.806264
PPI	Increased	k__Bacteria|p__Firmicutes|c__Clostridia|o__Clostridiales|f__Lachnospiraceae|g__Clostridium|[s__clostridioforme/s__bolteae]	4.49510401572132E-5;6.07246601410022E-4;6.50041307550031E-4	345;1174;309	42;78;117	0.889057951587764;1.91345404424163E-4;0.27218299604615	0.991109715557945;0.00537064389366803;0.744095035997608	0.13949633535977146;3.730176864548865;1.0980492228615062	miSeqRuns_UMCG-IBD-TIFN_Taxman_100Pc_GG13-PPI.txt;miSeqRuns_UMCG-IBD-TIFN_Taxman_100Pc_GG13-Reducing_stomach_acid2.txt;miSeqRuns_UMCG-IBD-TIFN_Taxman_100Pc_GG13-ZICPPI.txt	1828	237	Increased	3.5014	0.000462828	0.00253255	1.22067e-05	2.42308e-05	1.84939e-06	8.58204e-06	6.81822e-05	6.58845e-05	4.0547e-06	5.60337e-06	0	0	315	40	35	11	89	23	191	6	30.5464	0.236973
PPI	Increased	k__Bacteria|p__Proteobacteria|c__Gammaproteobacteria|o__Enterobacteriales|f__Enterobacteriaceae	0.00300766878326234;0.00610006971382067;0.0168974760104635	345;1174;309	281;921;263	0.257412221737893;0.0057501183579299;0.0608292380754239	0.764221651761189;0.0680156857195136;0.494793924345216	1.1325287086715135;2.761700585837851;1.8747346457419392	miSeqRuns_UMCG-IBD-TIFN_Taxman_100Pc_GG13-PPI.txt;miSeqRuns_UMCG-IBD-TIFN_Taxman_100Pc_GG13-Reducing_stomach_acid2.txt;miSeqRuns_UMCG-IBD-TIFN_Taxman_100Pc_GG13-ZICPPI.txt	1828	1465	Increased	3.476	0.000508958	0.0027334	0.00371902	0.00870512	0.00258497	0.00795029	0.00969945	0.015669	0.00295022	0.00197763	0	0	1712	177	236	79	199	57	1277	41	0	0.842953
PPI	Increased	k__Bacteria|p__Firmicutes|c__Bacilli|o__Lactobacillales|f__Lactobacillaceae|g__Lactobacillus|s__plantarum	0.00104552686254204;6.64409726319912E-4;0.00255145049698349	345;1174;309	51;148;50	0.0347011473340688;0.0543101801208271;0.025860303364734	0.354975671089491;0.308024875825773;0.380317405132724	2.111828669161685;1.9243543677126675;2.2283031960480857	miSeqRuns_UMCG-IBD-TIFN_Taxman_100Pc_GG13-PPI.txt;miSeqRuns_UMCG-IBD-TIFN_Taxman_100Pc_GG13-Reducing_stomach_acid2.txt;miSeqRuns_UMCG-IBD-TIFN_Taxman_100Pc_GG13-ZICPPI.txt	1828	249	Increased	3.37576	0.000736126	0.00388154	1.07983e-05	8.8698e-05	1.08198e-05	1.57819e-05	1.59846e-05	0.000254061	6.39323e-06	3.56965e-05	9.03026e-06	0	286	41	44	20	35	14	207	7	0	0.420515
PPI	Increased	k__Bacteria|p__Firmicutes|c__Bacilli|o__Bacillales|f__Planococcaceae|g__Solibacillus	1.05035140095798E-4;0.00142709965812753;-3.13945902531786E-5	345;1174;309	38;138;47	0.767567520552461;5.32717470759469E-5;0.955113018129078	0.980620380595767;0.00186794332599423;0.981221172800704	0.2955581726431813;4.040788671434451;-0.05628719681196705	miSeqRuns_UMCG-IBD-TIFN_Taxman_100Pc_GG13-PPI.txt;miSeqRuns_UMCG-IBD-TIFN_Taxman_100Pc_GG13-Reducing_stomach_acid2.txt;miSeqRuns_UMCG-IBD-TIFN_Taxman_100Pc_GG13-ZICPPI.txt	1828	223	Increased	3.34352	0.000827225	0.00428401	8.62548e-06	3.27034e-05	8.50696e-06	4.70739e-05	1.29016e-05	3.21782e-05	5.50045e-06	5.42549e-06	6.18391e-07	0	251	37	30	19	36	11	185	7	61.8274	0.072826
PPI	Increased	k__Bacteria|p__Actinobacteria|c__Actinobacteria|[o__Bifidobacteriales/o__Actinomycetales]	1.52642237116959E-4;2.53585114091723E-4;6.50868036526754E-4	345;1174;309	4;52;12	0.116901929214055;0.0463605207842698;0.0116211341709384	0.595544615871207;0.281937012039472;0.28026740025959	1.567910893188627;1.992096045437438;2.523444685670101	miSeqRuns_UMCG-IBD-TIFN_Taxman_100Pc_GG13-PPI.txt;miSeqRuns_UMCG-IBD-TIFN_Taxman_100Pc_GG13-Reducing_stomach_acid2.txt;miSeqRuns_UMCG-IBD-TIFN_Taxman_100Pc_GG13-ZICPPI.txt	1828	68	Increased	3.3151	0.000916117	0.00466112	9.59138e-07	5.91139e-06	1.2367e-06	3.91963e-06	6.79004e-07	1.28275e-05	1.60277e-07	1.64118e-06	1.62935e-05	1	63	14	3	7	6	6	54	1	0	0.405615
PPI	Increased	k__Bacteria|p__Firmicutes|c__Bacilli|o__Lactobacillales|f__Enterococcaceae|g__Enterococcus|s__casseliflavus	-3.22894528567292E-4;0.00141192055843268;5.74221977653588E-4	345;1174;309	18;33;30	0.479570453980562;6.26123337279459E-5;0.342609926280789	0.89910454667162;0.00213053475315367;0.778564119821985	-0.7069936016595778;4.0027428916780385;0.9490210103944893	miSeqRuns_UMCG-IBD-TIFN_Taxman_100Pc_GG13-PPI.txt;miSeqRuns_UMCG-IBD-TIFN_Taxman_100Pc_GG13-Reducing_stomach_acid2.txt;miSeqRuns_UMCG-IBD-TIFN_Taxman_100Pc_GG13-ZICPPI.txt	1828	81	Increased	3.29081	0.000998978	0.00499508	6.91935e-06	4.73219e-05	4.59806e-06	8.04705e-05	1.3809e-05	3.18901e-05	9.80858e-06	1.12941e-06	4.40609e-07	0	99	17	16	6	20	9	63	2	69.6647	0.037013
PPI	Increased	k__Bacteria|p__Firmicutes|c__Bacilli|o__Gemellales	0.00227899348062044;9.15041783987072E-4;0.00297565195905683	345;1174;309	223;722;188	0.0113087760401184;0.204941318212159;0.00544767230799479	0.227319961193777;0.625060148525238;0.203584131934562	2.5330098953050086;1.2675986390278804;2.7792968107578884	miSeqRuns_UMCG-IBD-TIFN_Taxman_100Pc_GG13-PPI.txt;miSeqRuns_UMCG-IBD-TIFN_Taxman_100Pc_GG13-Reducing_stomach_acid2.txt;miSeqRuns_UMCG-IBD-TIFN_Taxman_100Pc_GG13-ZICPPI.txt	1828	1133	Increased	3.25895	0.00111826	0.00549673	0.000125438	0.000144881	8.87496e-05	0.000129178	0.000358558	0.000204795	6.75089e-05	0.000104877	0.0667081	1	1306	140	181	60	141	43	984	37	60.9885	0.0770467
PPI	Increased	k__Bacteria|p__Fusobacteria|c__Fusobacteriia|o__Fusobacteriales|f__Leptotrichiaceae	2.11966229590964E-4;3.61042619374418E-4;3.24273468649445E-4	345;1174;309	9;34;8	0.230111082406266;0.00491741177225583;0.316585944548724	0.730401988461482;0.0606196071577343;0.766455146629365	1.2000727633889214;2.812394722844088;1.0014983352671665	miSeqRuns_UMCG-IBD-TIFN_Taxman_100Pc_GG13-PPI.txt;miSeqRuns_UMCG-IBD-TIFN_Taxman_100Pc_GG13-Reducing_stomach_acid2.txt;miSeqRuns_UMCG-IBD-TIFN_Taxman_100Pc_GG13-ZICPPI.txt	1828	51	Increased	3.18694	0.00143785	0.00694989	1.83587e-06	5.31448e-06	1.17738e-06	4.48511e-06	5.61622e-06	9.4669e-06	1.13279e-06	2.03922e-06	0	0	53	12	7	7	6	3	40	2	0	0.906588
PPI	Increased	k__Bacteria|p__Firmicutes|c__Bacilli|o__Lactobacillales|f__Lactobacillaceae|g__Lactobacillus|s__vaginalis	4.81337335731691E-4;3.68490047711877E-4;2.11160892106082E-4	345;1174;309	3;17;13	0.0107382482764783;0.018213569269715;0.808533760018494	0.227141251678727;0.154940089267027;0.930676979788904	2.551103333092191;2.3612475237502975;0.24231800945405016	miSeqRuns_UMCG-IBD-TIFN_Taxman_100Pc_GG13-PPI.txt;miSeqRuns_UMCG-IBD-TIFN_Taxman_100Pc_GG13-Reducing_stomach_acid2.txt;miSeqRuns_UMCG-IBD-TIFN_Taxman_100Pc_GG13-ZICPPI.txt	1828	33	Increased	3.1002	0.00193393	0.00919443	7.09506e-06	8.6739e-06	1.86148e-06	4.87726e-06	3.88941e-05	1.4464e-05	4.49827e-08	9.232e-06	1.62481e-05	1	26	15	1	7	7	6	18	2	20.9836	0.282081
PPI	Increased	k__Bacteria|p__Proteobacteria|c__Gammaproteobacteria|o__Enterobacteriales|f__Enterobacteriaceae|g__Raoultella|s__ornithinolytica	1.0027949371131E-4;4.68056482713502E-4;4.70271526396199E-4	345;1174;309	1;19;7	0.0141743209333833;0.0516042099946782;0.253156023669473	0.250303730492205;0.302410762207873;0.725035498162732	2.452815015841503;1.9464208255830402;1.142717205951926	miSeqRuns_UMCG-IBD-TIFN_Taxman_100Pc_GG13-PPI.txt;miSeqRuns_UMCG-IBD-TIFN_Taxman_100Pc_GG13-Reducing_stomach_acid2.txt;miSeqRuns_UMCG-IBD-TIFN_Taxman_100Pc_GG13-ZICPPI.txt	1828	27	Increased	3.09525	0.00196648	0.00919841	2.74965e-06	1.85483e-05	3.51196e-06	2.17982e-05	2.64662e-06	2.85772e-05	0	4.41176e-07	0	0	25	7	0	4	5	2	20	1	0	0.465311
PPI	Increased	k__Bacteria|p__Firmicutes|c__Bacilli|o__Gemellales|f__Gemellaceae	0.0022507765087476;9.03267791925546E-4;0.00248172286680927	345;1174;309	218;706;186	0.0121216152891613;0.209756384030595;0.0185576890344598	0.23466793411618;0.629649375144408;0.331552997838875	2.508583973663858;1.2542355992727936;2.354298760140598	miSeqRuns_UMCG-IBD-TIFN_Taxman_100Pc_GG13-PPI.txt;miSeqRuns_UMCG-IBD-TIFN_Taxman_100Pc_GG13-Reducing_stomach_acid2.txt;miSeqRuns_UMCG-IBD-TIFN_Taxman_100Pc_GG13-ZICPPI.txt	1828	1110	Increased	3.06289	0.00219207	0.0100909	0.000123151	0.000134202	8.64596e-05	0.000115111	0.000355621	0.000192002	6.57742e-05	0.000103259	0.0665173	1	1283	135	177	57	140	42	966	36	50.3414	0.133487
PPI	Increased	k__Bacteria|p__Firmicutes|c__Bacilli|o__Lactobacillales|f__Lactobacillaceae|g__Lactobacillus|s__delbrueckii	0.00309553783542781;6.64670255069751E-4;0.00692816661177167	345;1174;309	56;343;58	0.0476636614809639;0.0664560844231973;0.0955478701147121	0.401561489086626;0.348263531027895;0.54704231215891	1.9803549215245928;1.835334890439177;1.6668317244276092	miSeqRuns_UMCG-IBD-TIFN_Taxman_100Pc_GG13-PPI.txt;miSeqRuns_UMCG-IBD-TIFN_Taxman_100Pc_GG13-Reducing_stomach_acid2.txt;miSeqRuns_UMCG-IBD-TIFN_Taxman_100Pc_GG13-ZICPPI.txt	1828	457	Increased	3.01646	0.00255746	0.011589	0.000179732	0.00115062	0.000183281	0.000568147	0.000277728	0.00288354	8.48098e-05	0.000242556	0.000418448	1	495	52	46	34	47	9	402	9	0	0.61583
PPI	Increased	k__Bacteria|p__Firmicutes|c__Bacilli|o__Lactobacillales|f__Streptococcaceae|g__Streptococcus|s__infantis	2.91996453239527E-4;4.64709825930623E-4;4.89615944473402E-4	345;1174;309	45;198;60	0.363447306310551;0.0155770357952922;0.11838445634195	0.84966477990401;0.140549702262894;0.582032671106247	0.9088159111942786;2.4186776845775015;1.5615906380864553	miSeqRuns_UMCG-IBD-TIFN_Taxman_100Pc_GG13-PPI.txt;miSeqRuns_UMCG-IBD-TIFN_Taxman_100Pc_GG13-Reducing_stomach_acid2.txt;miSeqRuns_UMCG-IBD-TIFN_Taxman_100Pc_GG13-ZICPPI.txt	1828	303	Increased	2.97517	0.0029283	0.0130652	5.06657e-06	9.2332e-06	4.96497e-06	7.24384e-06	6.84449e-06	1.40704e-05	3.96185e-06	7.4041e-06	0.00285418	1	336	46	37	24	44	15	255	7	0	0.876823
PPI	Increased	k__Bacteria|p__Firmicutes|c__Erysipelotrichi|o__Erysipelotrichales|f__Erysipelotrichaceae|g__Allobaculum	-6.64267078283139E-4;0.00123592426372226;0.00311354865124946	345;1174;309	53;129;41	0.816170640053561;0.0139858271258741;0.00829423028323359	0.990167161895546;0.131593918866179;0.232122444709796	-0.2324730201450637;2.457627203163043;2.6398517416714964	miSeqRuns_UMCG-IBD-TIFN_Taxman_100Pc_GG13-PPI.txt;miSeqRuns_UMCG-IBD-TIFN_Taxman_100Pc_GG13-Reducing_stomach_acid2.txt;miSeqRuns_UMCG-IBD-TIFN_Taxman_100Pc_GG13-ZICPPI.txt	1828	223	Increased	2.95389	0.003138	0.0137879	7.70204e-05	0.000147209	1.01894e-05	0.000157676	2.7245e-05	0.000241567	0.000367121	1.58815e-05	0	0	264	30	45	11	28	12	191	7	53.8889	0.114329
PPI	Decreased	k__Bacteria|p__Firmicutes|c__Clostridia|o__Clostridiales|f__Dehalobacteriaceae|g__Dehalobacterium	-0.00252872875580829;-9.19651921918882E-4;-0.00139386738391557	345;1174;309	179;697;61	0.0112252870182175;0.209525623984396;0.040548353107375	0.227175538357871;0.629649375144408;0.426674906000217	-2.535606249953664;-1.2548709147499397;-2.048118872647474	miSeqRuns_UMCG-IBD-TIFN_Taxman_100Pc_GG13-PPI.txt;miSeqRuns_UMCG-IBD-TIFN_Taxman_100Pc_GG13-Reducing_stomach_acid2.txt;miSeqRuns_UMCG-IBD-TIFN_Taxman_100Pc_GG13-ZICPPI.txt	1828	937	Decreased	-2.94926	0.00318536	0.0137879	8.45473e-05	6.05925e-05	9.83192e-05	0.000103512	2.88063e-05	9.85025e-06	7.98026e-05	3.69739e-05	1.08357e-06	0	1063	77	158	50	50	8	855	19	42.8679	0.173717
PPI	Increased	k__Bacteria|p__Actinobacteria|c__Coriobacteriia|o__Coriobacteriales|f__Coriobacteriaceae|g__Atopobium|s__rimae	6.36418544376857E-4;5.89087074119694E-4;1.94251919550399E-4	345;1174;309	41;148;37	0.0632980753416932;0.0198025912400612;0.594400067565021	0.457989995930791;0.162610369058883;0.858149015294088	1.857091935689844;2.3300673596501422;0.5324706453743492	miSeqRuns_UMCG-IBD-TIFN_Taxman_100Pc_GG13-PPI.txt;miSeqRuns_UMCG-IBD-TIFN_Taxman_100Pc_GG13-Reducing_stomach_acid2.txt;miSeqRuns_UMCG-IBD-TIFN_Taxman_100Pc_GG13-ZICPPI.txt	1828	226	Increased	2.893	0.00381579	0.0162739	5.64776e-06	1.02371e-05	5.64611e-06	1.07974e-05	7.8585e-06	7.60305e-06	3.81035e-06	1.22484e-05	0.000205158	1	249	34	30	19	30	7	189	8	0	0.672983
PPI	Decreased	k__Bacteria|p__Tenericutes	-0.00377292616945015;-0.0113239660566653;-0.00673031959187317	345;1174;309	199;828;81	0.489844416540605;0.017330557932364;0.0977533147177655	0.902924486185898;0.150258659350758;0.550223298875524	-0.6905563020644052;-2.379618752624654;-1.6558444934481324	miSeqRuns_UMCG-IBD-TIFN_Taxman_100Pc_GG13-PPI.txt;miSeqRuns_UMCG-IBD-TIFN_Taxman_100Pc_GG13-Reducing_stomach_acid2.txt;miSeqRuns_UMCG-IBD-TIFN_Taxman_100Pc_GG13-ZICPPI.txt	1828	1108	Decreased	-2.8878	0.0038795	0.0163058	0.00325463	0.00156027	0.00406602	0.00242569	0.000984563	0.000283377	0.00212948	0.00138257	0	0	1242	102	176	68	65	13	1001	21	0	0.762654
PPI	Increased	k__Bacteria|p__Firmicutes|c__Clostridia|o__Clostridiales|f__Veillonellaceae|[g__Dialister/g__Veillonella]	-1.1251864157217E-5;1.62667761546919E-4;3.81914648181998E-4	345;1174;309	4;15;17	0.88315453944419;0.00160552630290616;0.314468450717767	0.991109715557945;0.0288994734523109;0.766455146629365	-0.14697146992915588;3.1549008994307686;1.0058900757328662	miSeqRuns_UMCG-IBD-TIFN_Taxman_100Pc_GG13-PPI.txt;miSeqRuns_UMCG-IBD-TIFN_Taxman_100Pc_GG13-Reducing_stomach_acid2.txt;miSeqRuns_UMCG-IBD-TIFN_Taxman_100Pc_GG13-ZICPPI.txt	1828	36	Increased	2.87803	0.00400165	0.0165789	1.08699e-06	2.948e-06	1.63823e-07	9.87677e-07	6.17634e-06	8.68833e-06	2.76851e-07	0	0	0	38	12	4	5	10	7	24	0	26.0286	0.258755
PPI	Decreased	k__Bacteria|p__Actinobacteria|c__Actinobacteria|o__Bifidobacteriales|f__Bifidobacteriaceae|g__Bifidobacterium	-0.0258599529965127;-0.0240510078505809;-0.0499057799516026	345;1174;309	343;1172;301	0.237365794473113;0.0851497284106387;0.0204482015156753	0.742863051356568;0.402096661412766;0.351217607149067	-1.181596622151734;-1.72155738539661;-2.3180206001312222	miSeqRuns_UMCG-IBD-TIFN_Taxman_100Pc_GG13-PPI.txt;miSeqRuns_UMCG-IBD-TIFN_Taxman_100Pc_GG13-Reducing_stomach_acid2.txt;miSeqRuns_UMCG-IBD-TIFN_Taxman_100Pc_GG13-ZICPPI.txt	1828	1816	Decreased	-2.846	0.00442719	0.0180836	0.0804692	0.060479	0.0836941	0.0679116	0.0702744	0.0437073	0.0769749	0.0657826	0.000777529	0	2121	206	288	97	235	59	1598	50	0	0.441883
PPI	Increased	k__Bacteria|p__Fusobacteria|c__Fusobacteriia|o__Fusobacteriales|f__Leptotrichiaceae|g__Leptotrichia	2.39691602587697E-4;1.70182446754438E-4;3.24273468649445E-4	345;1174;309	7;23;8	0.109027450387153;0.0330544466570273;0.316585944548724	0.580944187028363;0.226928350493324;0.766455146629365	1.60257982730815;2.1314213363853014;1.0014983352671665	miSeqRuns_UMCG-IBD-TIFN_Taxman_100Pc_GG13-PPI.txt;miSeqRuns_UMCG-IBD-TIFN_Taxman_100Pc_GG13-Reducing_stomach_acid2.txt;miSeqRuns_UMCG-IBD-TIFN_Taxman_100Pc_GG13-ZICPPI.txt	1828	38	Increased	2.81608	0.00486141	0.0195814	1.27782e-06	3.98097e-06	4.57498e-07	1.65646e-06	5.61622e-06	9.4669e-06	7.11339e-07	2.03922e-06	0	0	40	10	5	5	6	3	29	2	0	0.912137
PPI	Decreased	k__Bacteria|p__Actinobacteria|c__Actinobacteria|o__Bifidobacteriales|f__Bifidobacteriaceae	-0.0251142244731313;-0.0234862980118816;-0.0485211078016562	345;1174;309	344;1172;304	0.249413098506911;0.092399453806227;0.0233857330291907	0.754835259553063;0.4188325606837;0.369919777007198	-1.1517760827422556;-1.682874165165335;-2.267073550380509	miSeqRuns_UMCG-IBD-TIFN_Taxman_100Pc_GG13-PPI.txt;miSeqRuns_UMCG-IBD-TIFN_Taxman_100Pc_GG13-Reducing_stomach_acid2.txt;miSeqRuns_UMCG-IBD-TIFN_Taxman_100Pc_GG13-ZICPPI.txt	1828	1820	Decreased	-2.7811	0.0054175	0.0215224	0.0805681	0.0607884	0.0837843	0.0681903	0.0704438	0.0441506	0.0770477	0.065994	0.00166793	0	2127	207	288	97	238	59	1601	51	0	0.457546
PPI	Increased	k__Bacteria|p__Firmicutes|c__Bacilli|o__Bacillales|f__Staphylococcaceae|g__Staphylococcus|s__haemolyticus	-3.2071585793424E-5;4.51010354853527E-4;3.33421807182744E-5	345;1174;309	3;16;5	0.642552570095588;5.48448214047278E-4;0.694491078750353	0.946840854127298;0.0127919752459478;0.897199984639458	-0.4641328463380968;3.4559051804163645;0.3927676787675148	miSeqRuns_UMCG-IBD-TIFN_Taxman_100Pc_GG13-PPI.txt;miSeqRuns_UMCG-IBD-TIFN_Taxman_100Pc_GG13-Reducing_stomach_acid2.txt;miSeqRuns_UMCG-IBD-TIFN_Taxman_100Pc_GG13-ZICPPI.txt	1828	24	Increased	2.72939	0.00634516	0.0248671	2.21601e-07	7.33071e-06	2.07507e-07	1.52297e-05	2.79917e-07	5.285e-07	2.25398e-07	0	4.73582e-05	1	24	6	3	4	3	2	18	0	58.8765	0.0878874
PPI	Decreased	k__Bacteria|p__Tenericutes|c__Mollicutes	-0.00319338632554632;-0.0109683882201625;-0.00578774247445968	345;1174;309	195;791;67	0.557382012956397;0.0211702730049529;0.130832622846932	0.928462951801346;0.171169093503442;0.593550187667558	-0.586734530362737;-2.304933947509363;-1.510826650218001	miSeqRuns_UMCG-IBD-TIFN_Taxman_100Pc_GG13-PPI.txt;miSeqRuns_UMCG-IBD-TIFN_Taxman_100Pc_GG13-Reducing_stomach_acid2.txt;miSeqRuns_UMCG-IBD-TIFN_Taxman_100Pc_GG13-ZICPPI.txt	1828	1053	Decreased	-2.72322	0.00646492	0.0249707	0.00317335	0.00153449	0.00398439	0.00239368	0.000858242	0.000247935	0.00208709	0.00138023	0	0	1178	97	172	65	54	11	952	21	0	0.769644
PPI	Increased	k__Bacteria|p__Firmicutes|c__Bacilli|o__Lactobacillales|f__Lactobacillaceae|g__Lactobacillus|s__brevis	1.0794500735641E-4;2.10984848441265E-4;4.44111185669925E-4	345;1174;309	4;21;4	0.276818612611456;0.0552858419116941;0.0838372372777298	0.779492137626724;0.309518814511923;0.542154774116346	1.0874938555151856;1.9166230154351265;1.7288427799961452	miSeqRuns_UMCG-IBD-TIFN_Taxman_100Pc_GG13-PPI.txt;miSeqRuns_UMCG-IBD-TIFN_Taxman_100Pc_GG13-Reducing_stomach_acid2.txt;miSeqRuns_UMCG-IBD-TIFN_Taxman_100Pc_GG13-ZICPPI.txt	1828	29	Increased	2.71921	0.0065438	0.0249707	7.29842e-07	5.28732e-06	9.94118e-07	1.72121e-06	1.06224e-07	1.4739e-05	2.66851e-07	1.0902e-06	0	0	26	8	3	5	2	2	21	1	0	0.798165
PPI	Decreased	k__Bacteria|p__Firmicutes|c__Clostridia|o__Clostridiales|[f__Ruminococcaceae/f__[Mogibacteriaceae]]	-0.00473026786370609;-0.0024567578033418;-0.00447061554288984	345;1174;309	306;1110;171	0.0717350157700577;0.163077849648953;0.0533091898268032	0.476198402558681;0.553030562079065;0.464800387117356	-1.8007961510545387;-1.3947943948675132;-1.9324078181839512	miSeqRuns_UMCG-IBD-TIFN_Taxman_100Pc_GG13-PPI.txt;miSeqRuns_UMCG-IBD-TIFN_Taxman_100Pc_GG13-Reducing_stomach_acid2.txt;miSeqRuns_UMCG-IBD-TIFN_Taxman_100Pc_GG13-ZICPPI.txt	1828	1587	Decreased	-2.6946	0.00704742	0.0265432	0.00118645	0.000794206	0.00135638	0.0011006	0.000506478	0.000269077	0.00112139	0.000817234	0	0	1805	166	258	93	136	30	1411	43	0	0.435684
PPI	Decreased	k__Bacteria|p__Firmicutes|c__Clostridia|o__Clostridiales|f__Lachnospiraceae|g__Lachnospira	-0.00949360325761745;-0.00490900817253845;-0.00590252163583651	345;1174;309	327;1148;274	0.0539691256835389;0.0679002455757471;0.368187796212364	0.428094081693156;0.350653243264357;0.78889856267915	-1.9270842945476856;-1.8256682690960706;-0.8998730826654016	miSeqRuns_UMCG-IBD-TIFN_Taxman_100Pc_GG13-PPI.txt;miSeqRuns_UMCG-IBD-TIFN_Taxman_100Pc_GG13-Reducing_stomach_acid2.txt;miSeqRuns_UMCG-IBD-TIFN_Taxman_100Pc_GG13-ZICPPI.txt	1828	1749	Decreased	-2.67024	0.00757969	0.028182	0.00299477	0.00257036	0.00239813	0.0020166	0.00539659	0.00374754	0.0032112	0.00226037	3.01825e-06	0	2044	187	274	92	220	47	1550	48	0	0.69548
PPI	Increased	k__Bacteria|p__Firmicutes|c__Clostridia|o__Clostridiales|f__Veillonellaceae|g__Megasphaera	4.67336465428521E-4;4.11618173061814E-4;6.29952563456779E-4	345;1174;309	98;270;138	0.173600877487366;0.0542028185599894;0.198281469270728	0.684630929797919;0.308024875825773;0.664035514662305	1.360724157173512;1.9252121830139513;1.286463156194419	miSeqRuns_UMCG-IBD-TIFN_Taxman_100Pc_GG13-PPI.txt;miSeqRuns_UMCG-IBD-TIFN_Taxman_100Pc_GG13-Reducing_stomach_acid2.txt;miSeqRuns_UMCG-IBD-TIFN_Taxman_100Pc_GG13-ZICPPI.txt	1828	506	Increased	2.66291	0.00774675	0.0284385	0.00180739	0.00424591	0.000989962	0.00260394	0.00606888	0.00900149	0.00129427	0.00183847	0	0	609	74	81	27	102	31	426	16	0	0.940873
PPI	Decreased	k__Bacteria|p__Firmicutes|c__Clostridia|o__Clostridiales|f__Dehalobacteriaceae	-0.00235127608948005;-8.12495456318163E-4;-0.00141534119574392	345;1174;309	180;708;61	0.0240306476232629;0.309348842765105;0.0390393529337389	0.297323010150912;0.744595470376473;0.417155003581701	-2.256638899457422;-1.0165893077660721;-2.063771853563337	miSeqRuns_UMCG-IBD-TIFN_Taxman_100Pc_GG13-PPI.txt;miSeqRuns_UMCG-IBD-TIFN_Taxman_100Pc_GG13-Reducing_stomach_acid2.txt;miSeqRuns_UMCG-IBD-TIFN_Taxman_100Pc_GG13-ZICPPI.txt	1828	949	Decreased	-2.64355	0.00820427	0.0297416	9.90623e-05	6.78945e-05	0.000116772	0.000117282	2.92907e-05	9.85025e-06	9.13723e-05	4.03118e-05	1.08357e-06	0	1071	81	158	53	50	8	863	20	41.1192	0.182986
PPI	Decreased	k__Bacteria|p__Tenericutes|c__Mollicutes|o__Anaeroplasmatales|f__Anaeroplasmataceae	-0.00107838825630942;-0.00151073677957086;-0.00174618264695945	345;1174;309	25;183;11	0.42594744861949;0.0382683904641749;0.193226563064168	0.869629952506614;0.249170856914837;0.659948663190361	-0.7961455377241681;-2.071968376267349;-1.3010931766433789	miSeqRuns_UMCG-IBD-TIFN_Taxman_100Pc_GG13-PPI.txt;miSeqRuns_UMCG-IBD-TIFN_Taxman_100Pc_GG13-Reducing_stomach_acid2.txt;miSeqRuns_UMCG-IBD-TIFN_Taxman_100Pc_GG13-ZICPPI.txt	1828	219	Decreased	-2.54127	0.0110452	0.0393627	6.74029e-05	3.37732e-06	5.43675e-05	5.96852e-06	0.00010196	0	8.70733e-05	2.32067e-06	0	0	243	9	23	8	11	0	209	1	0	0.922328
PPI	Decreased	k__Bacteria|p__Tenericutes|c__Mollicutes|o__RF39	-0.00231439721085465;-0.0106342855592088;-0.00496357021139288	345;1174;309	187;770;62	0.666951860776549;0.025635134505044;0.170749094593797	0.954956196352374;0.195330288682605;0.637120141321575	-0.4303351510437095;-2.2316949007453326;-1.3698007925894236	miSeqRuns_UMCG-IBD-TIFN_Taxman_100Pc_GG13-PPI.txt;miSeqRuns_UMCG-IBD-TIFN_Taxman_100Pc_GG13-Reducing_stomach_acid2.txt;miSeqRuns_UMCG-IBD-TIFN_Taxman_100Pc_GG13-ZICPPI.txt	1828	1019	Decreased	-2.5386	0.0111297	0.0393627	0.00310572	0.00153111	0.00393001	0.00238771	0.000754913	0.000247935	0.00199992	0.00137791	0	0	1133	95	164	63	49	11	920	21	0	0.741738
PPI	Decreased	k__Bacteria|p__Firmicutes|c__Clostridia|o__Clostridiales|f__Clostridiaceae|g__Clostridium|s__septicum	-1.68687224757874E-4;-2.90522054278979E-4;-1.0696193981126E-4	345;1174;309	14;71;6	0.204670856796711;0.0404478464734201;0.418077205426228	0.705204500290218;0.257621668307629;0.806298730751268	-1.2683559727532012;-2.0491459395121217;-0.8097616018020879	miSeqRuns_UMCG-IBD-TIFN_Taxman_100Pc_GG13-PPI.txt;miSeqRuns_UMCG-IBD-TIFN_Taxman_100Pc_GG13-Reducing_stomach_acid2.txt;miSeqRuns_UMCG-IBD-TIFN_Taxman_100Pc_GG13-ZICPPI.txt	1828	91	Decreased	-2.52611	0.0115332	0.0395742	1.63296e-06	2.17048e-07	1.98107e-06	4.60404e-07	9.73104e-07	0	8.88374e-07	0	0	0	108	3	14	3	6	0	88	0	0	0.959737
PPI	Increased	k__Bacteria|p__Proteobacteria|c__Gammaproteobacteria|o__Enterobacteriales|f__Enterobacteriaceae|g__Shigella|s__flexneri	8.83740208549995E-5;6.58712003934541E-4;4.81098755442985E-5	345;1174;309	33;110;73	0.797015776951125;0.00308940042992751;0.917369302933638	0.989687491715571;0.043793301172082;0.965626499300479	0.2572111501298575;2.9586996544777606;0.10374803872288273	miSeqRuns_UMCG-IBD-TIFN_Taxman_100Pc_GG13-PPI.txt;miSeqRuns_UMCG-IBD-TIFN_Taxman_100Pc_GG13-Reducing_stomach_acid2.txt;miSeqRuns_UMCG-IBD-TIFN_Taxman_100Pc_GG13-ZICPPI.txt	1828	216	Increased	2.52548	0.0115541	0.0395742	6.58273e-06	2.27136e-05	3.49648e-06	1.66617e-05	2.25926e-05	4.65497e-05	4.71191e-06	6.41916e-06	0	0	259	34	27	13	54	16	178	5	18.4599	0.29335
PPI	Decreased	k__Bacteria|p__Bacteroidetes|c__Bacteroidia|o__Bacteroidales|f__Rikenellaceae|g__Alistipes|s__massiliensis	-0.0014033432527802;-0.00170874135822537;-0.00489255553308516	345;1174;309	87;256;62	0.322562239827915;0.102010119967941;0.0565517457744754	0.816134522825679;0.443382568679553;0.478737167503328	-0.9892062526794604;-1.635185723794698;-1.9067594407149158	miSeqRuns_UMCG-IBD-TIFN_Taxman_100Pc_GG13-PPI.txt;miSeqRuns_UMCG-IBD-TIFN_Taxman_100Pc_GG13-Reducing_stomach_acid2.txt;miSeqRuns_UMCG-IBD-TIFN_Taxman_100Pc_GG13-ZICPPI.txt	1828	405	Decreased	-2.52412	0.0115989	0.0395742	0.000154217	4.89601e-05	0.000114192	3.79686e-05	0.00039095	6.88817e-05	0.000105685	4.68592e-05	0	0	481	43	75	17	46	14	360	12	0	0.632256
PPI	Increased	k__Bacteria|p__Proteobacteria|c__Gammaproteobacteria|o__Enterobacteriales|f__Enterobacteriaceae|g__Escherichia|s__coli	0.00218430221890306;0.00398148677406087;0.00212877596433823	345;1174;309	255;830;243	0.298734862756639;0.025967073800958;0.538877144698903	0.797062305050999;0.196953317012457;0.843389593796883	1.0391502523957847;2.2267038374322405;0.6145118503203365	miSeqRuns_UMCG-IBD-TIFN_Taxman_100Pc_GG13-PPI.txt;miSeqRuns_UMCG-IBD-TIFN_Taxman_100Pc_GG13-Reducing_stomach_acid2.txt;miSeqRuns_UMCG-IBD-TIFN_Taxman_100Pc_GG13-ZICPPI.txt	1828	1328	Increased	2.48856	0.0128262	0.0431841	0.00203192	0.00540846	0.00148574	0.00569799	0.00495598	0.00853588	0.00162514	0.00116713	0	0	1559	156	214	69	185	50	1160	37	0	0.894603
PPI	Increased	k__Bacteria|p__Proteobacteria|c__Gammaproteobacteria|o__Enterobacteriales|f__Enterobacteriaceae|g__Escherichia	0.00218430221890306;0.00397428628329733;0.00212877596433823	345;1174;309	255;830;243	0.298734862756639;0.0262644522891341;0.538877144698903	0.797062305050999;0.198719749533788;0.843389593796883	1.0391502523957847;2.222279061433476;0.6145118503203365	miSeqRuns_UMCG-IBD-TIFN_Taxman_100Pc_GG13-PPI.txt;miSeqRuns_UMCG-IBD-TIFN_Taxman_100Pc_GG13-Reducing_stomach_acid2.txt;miSeqRuns_UMCG-IBD-TIFN_Taxman_100Pc_GG13-ZICPPI.txt	1828	1328	Increased	2.48501	0.0129547	0.0431841	0.00203209	0.00540846	0.001486	0.00569799	0.00495598	0.00853588	0.00162514	0.00116713	0	0	1559	156	214	69	185	50	1160	37	0	0.895521
PPI	Decreased	k__Bacteria|p__Firmicutes|c__Clostridia|o__Clostridiales|f__Lachnospiraceae|g__Coprococcus	-0.0100941374189415;-0.00697183132173603;-0.00483079063712884	345;1174;309	345;1174;304	0.117342365886619;0.0748344268184491;0.369771327835834	0.596075810724095;0.371406026407648;0.789016032245095	-1.5660267029671568;-1.7814778098299442;-0.8969017844365523	miSeqRuns_UMCG-IBD-TIFN_Taxman_100Pc_GG13-PPI.txt;miSeqRuns_UMCG-IBD-TIFN_Taxman_100Pc_GG13-Reducing_stomach_acid2.txt;miSeqRuns_UMCG-IBD-TIFN_Taxman_100Pc_GG13-ZICPPI.txt	1828	1823	Decreased	-2.47675	0.0132585	0.0436943	0.0192531	0.0167743	0.0196762	0.018253	0.0134113	0.0125407	0.022551	0.0188846	8.70469e-05	0	2127	208	289	99	237	58	1601	51	0	0.862326
PPI	Increased	k__Bacteria|p__Firmicutes|c__Bacilli|o__Bacillales|f__Bacillaceae|g__Bacillus|s__flexus	1.34473540021092E-4;4.4111824988311E-5;1.85819400889582E-4	345;1174;309	10;9;2	0.30699230251125;0.36841272154882;0.00154991030836359	0.800961101464891;0.805224109394869;0.131973213916406	1.0215534429330728;0.8994505547328181;3.165172505369446	miSeqRuns_UMCG-IBD-TIFN_Taxman_100Pc_GG13-PPI.txt;miSeqRuns_UMCG-IBD-TIFN_Taxman_100Pc_GG13-Reducing_stomach_acid2.txt;miSeqRuns_UMCG-IBD-TIFN_Taxman_100Pc_GG13-ZICPPI.txt	1828	21	Increased	2.46594	0.0136653	0.0445292	2.28156e-07	7.63333e-07	1.7266e-07	5.79798e-07	0	8.15e-07	6.24844e-07	1.05882e-06	0	0	22	5	7	1	0	2	15	2	65.4578	0.0552983
PPI	Decreased	k__Bacteria|p__Actinobacteria|c__Actinobacteria	-0.021428313857705;-0.0208676455070877;-0.0399668051898704	345;1174;309	345;1174;308	0.314101437766089;0.126874399905812;0.0540785705534533	0.805917318179607;0.495528316613265;0.468446838430563	-1.0066532449746395;-1.5265441662697201;-1.926206692146093	miSeqRuns_UMCG-IBD-TIFN_Taxman_100Pc_GG13-PPI.txt;miSeqRuns_UMCG-IBD-TIFN_Taxman_100Pc_GG13-Reducing_stomach_acid2.txt;miSeqRuns_UMCG-IBD-TIFN_Taxman_100Pc_GG13-ZICPPI.txt	1828	1827	Decreased	-2.45263	0.0141817	0.0453636	0.0815973	0.0627341	0.0848107	0.0698786	0.0717542	0.0467862	0.0778522	0.0676275	0.181838	1	2133	210	289	99	240	60	1604	51	0	0.594944
PPI	Increased	k__Bacteria|p__Actinobacteria|c__Actinobacteria|o__Actinomycetales|f__Corynebacteriaceae|g__Corynebacterium	8.62761975776484E-4;7.0599349714339E-4;0.0017809740231756	345;1174;309	187;775;171	0.212437253703684;0.229737595730702;0.0212450663608868	0.716060415073437;0.655899546768726;0.358745804119278	1.2468915821900988;1.2010350751956707;2.303600738526619	miSeqRuns_UMCG-IBD-TIFN_Taxman_100Pc_GG13-PPI.txt;miSeqRuns_UMCG-IBD-TIFN_Taxman_100Pc_GG13-Reducing_stomach_acid2.txt;miSeqRuns_UMCG-IBD-TIFN_Taxman_100Pc_GG13-ZICPPI.txt	1828	1133	Increased	2.4513	0.0142343	0.0453636	6.63658e-05	9.63076e-05	7.27517e-05	0.000117031	7.42923e-05	0.000109584	3.60019e-05	4.04611e-05	0.0496685	1	1293	124	157	64	134	33	1002	27	12.8519	0.317438
PPI	Increased	k__Bacteria|p__Firmicutes|c__Bacilli|o__Lactobacillales|f__Leuconostocaceae	0.00245393052883727;9.30364415992799E-4;0.00153117706647824	345;1174;309	179;685;147	0.00959873745265553;0.338256190339398;0.192631842213434	0.212648952797292;0.782329412887852;0.659948663190361	2.5899589600923703;0.9576164712615842;1.3028328231745807	miSeqRuns_UMCG-IBD-TIFN_Taxman_100Pc_GG13-PPI.txt;miSeqRuns_UMCG-IBD-TIFN_Taxman_100Pc_GG13-Reducing_stomach_acid2.txt;miSeqRuns_UMCG-IBD-TIFN_Taxman_100Pc_GG13-ZICPPI.txt	1828	1011	Increased	2.42824	0.0151724	0.047828	0.000260201	0.000218916	0.000255503	0.000276697	0.000468588	0.000186971	0.000103901	0.000144337	0.000212975	0	1134	128	148	63	108	36	878	29	41.6222	0.180328
PPI	Increased	k__Bacteria|p__Firmicutes|c__Bacilli|o__Bacillales|f__Bacillaceae|g__Bacillus	-2.3292686437229E-4;4.2724700782802E-4;0.00102772212765684	345;1174;309	51;198;49	0.49813308007608;0.0293575630731968;0.0211406428546804	0.904840308511528;0.213540810172243;0.358495138578097	-0.6774301408430978;2.1786515563218036;2.3054632467909877	miSeqRuns_UMCG-IBD-TIFN_Taxman_100Pc_GG13-PPI.txt;miSeqRuns_UMCG-IBD-TIFN_Taxman_100Pc_GG13-Reducing_stomach_acid2.txt;miSeqRuns_UMCG-IBD-TIFN_Taxman_100Pc_GG13-ZICPPI.txt	1828	298	Increased	2.39953	0.016416	0.0511918	6.40197e-06	1.56034e-05	6.50578e-06	1.70344e-05	6.93389e-06	2.35119e-05	5.57226e-06	3.52157e-06	5.96707e-05	1	336	40	45	22	35	13	256	5	58.0083	0.0924192
PPI	Increased	k__Bacteria|p__Firmicutes|c__Erysipelotrichi|o__Erysipelotrichales|f__Erysipelotrichaceae|g__Eubacterium|s__cylindroides	0.0121682837970172;0.00427425227333866;3.40322385094706E-4	345;1174;309	25;74;12	0.0137353340736717;0.115388022537325;0.913691051923342	0.250303730492205;0.471808803263728;0.962618621894332	2.464111591513592;1.5744302173984903;0.1083840511743921	miSeqRuns_UMCG-IBD-TIFN_Taxman_100Pc_GG13-PPI.txt;miSeqRuns_UMCG-IBD-TIFN_Taxman_100Pc_GG13-Reducing_stomach_acid2.txt;miSeqRuns_UMCG-IBD-TIFN_Taxman_100Pc_GG13-ZICPPI.txt	1828	111	Increased	2.37679	0.0174641	0.0538808	0.000520629	0.00175639	0.000555883	0.0015064	0.000479309	0.000253351	0.000423953	0.00400995	0	0	119	18	19	11	9	2	91	5	31.3494	0.233015
PPI	Decreased	k__Bacteria|p__Firmicutes|c__Clostridia|o__Clostridiales|f__Lachnospiraceae|g__Coprococcus|s__catus	-3.86178248320438E-4;-9.57334168316316E-4;-0.00431452575333818	345;1174;309	288;1001;178	0.746830390076321;0.149386015342195;0.009036466058109	0.977019953037519;0.530485864345979;0.242294161586299	-0.32282155193539713;-1.4417035726399103;-2.6106714588578273	miSeqRuns_UMCG-IBD-TIFN_Taxman_100Pc_GG13-PPI.txt;miSeqRuns_UMCG-IBD-TIFN_Taxman_100Pc_GG13-Reducing_stomach_acid2.txt;miSeqRuns_UMCG-IBD-TIFN_Taxman_100Pc_GG13-ZICPPI.txt	1828	1467	Decreased	-2.36897	0.0178376	0.0544538	0.000186399	0.000172092	0.000166629	0.000143294	0.000249039	0.000177647	0.000207699	0.000221459	0	0	1699	146	241	78	147	26	1311	42	40.9386	0.183939
PPI	Decreased	k__Bacteria|p__Firmicutes|c__Clostridia|o__Clostridiales|[f__Clostridiaceae/f__Lachnospiraceae]	-0.00100659096782118;-0.00180150036724248;-3.05670078629883E-4	345;1174;309	158;758;54	0.281945355244244;0.0312603536907096;0.678224067998927	0.78425216198696;0.221769498905061;0.892001553295908	-1.0759595322399436;-2.153742723302729;-0.4148877634757603	miSeqRuns_UMCG-IBD-TIFN_Taxman_100Pc_GG13-PPI.txt;miSeqRuns_UMCG-IBD-TIFN_Taxman_100Pc_GG13-Reducing_stomach_acid2.txt;miSeqRuns_UMCG-IBD-TIFN_Taxman_100Pc_GG13-ZICPPI.txt	1828	970	Decreased	-2.364	0.0180786	0.0546145	0.00010866	5.77531e-05	0.000135407	8.12802e-05	2.79557e-05	1.70178e-05	7.6469e-05	6.00065e-05	0	0	1072	79	141	54	43	9	888	16	0	0.826996
PPI	Increased	k__Bacteria|p__Proteobacteria|c__Gammaproteobacteria|o__Enterobacteriales|f__Enterobacteriaceae|g__Klebsiella|s__oxytoca	-6.0698564335788E-4;4.05531904939125E-4;2.06683277826595E-5	345;1174;309	14;24;35	0.401472123191074;7.29750085638528E-4;0.981716790517303	0.858855298985625;0.015892560999101;0.992066303856681	-0.8389949861202323;3.3781509575166657;0.022916610618876135	miSeqRuns_UMCG-IBD-TIFN_Taxman_100Pc_GG13-PPI.txt;miSeqRuns_UMCG-IBD-TIFN_Taxman_100Pc_GG13-Reducing_stomach_acid2.txt;miSeqRuns_UMCG-IBD-TIFN_Taxman_100Pc_GG13-ZICPPI.txt	1828	73	Increased	2.35217	0.0186645	0.0558032	1.77425e-05	1.8962e-05	8.43214e-07	5.86461e-06	8.60194e-05	5.46638e-05	2.36667e-05	2.38431e-06	0	0	89	19	11	7	25	10	53	2	69.6218	0.0371857
PPI	Increased	k__Bacteria|p__Firmicutes|c__Clostridia|o__Clostridiales|f__Lachnospiraceae|g__Blautia|s__producta	0.00268954992200069;0.00187360076412128;0.00479555801273152	345;1174;309	264;701;234	0.524137886369012;0.0646996358968213;0.165224529073473	0.921065026925763;0.341944458654689;0.637120141321575	0.6369799765615173;1.8473278711898855;1.3877127596051224	miSeqRuns_UMCG-IBD-TIFN_Taxman_100Pc_GG13-PPI.txt;miSeqRuns_UMCG-IBD-TIFN_Taxman_100Pc_GG13-Reducing_stomach_acid2.txt;miSeqRuns_UMCG-IBD-TIFN_Taxman_100Pc_GG13-ZICPPI.txt	1828	1199	Increased	2.32771	0.0199276	0.0587526	0.00177682	0.002134	0.000904973	0.0011539	0.00535546	0.00413694	0.00203556	0.00168015	9.6853e-06	0	1441	147	220	60	180	48	1041	39	0	0.849638
PPI	Decreased	k__Bacteria|p__Actinobacteria|c__Actinobacteria|o__Bifidobacteriales|f__Bifidobacteriaceae|g__Bifidobacterium|s__animalis	-2.11621761283856E-4;-0.00122710055141165;-9.44435431868901E-4	345;1174;309	160;601;100	0.764818101928514;0.0545671519734797;0.111237510832201	0.980389249678797;0.308024875825773;0.569809944514624	-0.2991598242220893;-1.9223069025452562;-1.5926554320548165	miSeqRuns_UMCG-IBD-TIFN_Taxman_100Pc_GG13-PPI.txt;miSeqRuns_UMCG-IBD-TIFN_Taxman_100Pc_GG13-Reducing_stomach_acid2.txt;miSeqRuns_UMCG-IBD-TIFN_Taxman_100Pc_GG13-ZICPPI.txt	1828	861	Decreased	-2.3253	0.0200562	0.0587526	0.0010279	0.00150162	0.00108386	0.00286678	0.000789506	0.000422514	0.00101854	0.000121141	0.000178332	0	997	76	136	40	82	14	779	22	0	0.633082
PPI	Increased	k__Bacteria|p__Firmicutes|c__Bacilli|o__Lactobacillales|f__Lactobacillaceae|g__Lactobacillus|s__ruminis	0.0018885831855828;0.00451656654844636;0.00618314602701805	345;1174;309	57;148;32	0.714214542761435;0.0912847990197357;0.0627776263514117	0.966745932067538;0.415875605423067;0.499081836837491	0.3662017415346336;1.6886589895877007;1.8607631864668088	miSeqRuns_UMCG-IBD-TIFN_Taxman_100Pc_GG13-PPI.txt;miSeqRuns_UMCG-IBD-TIFN_Taxman_100Pc_GG13-Reducing_stomach_acid2.txt;miSeqRuns_UMCG-IBD-TIFN_Taxman_100Pc_GG13-ZICPPI.txt	1828	237	Increased	2.27741	0.0227619	0.0660121	0.000644678	0.00110592	0.000594477	0.0011187	0.000403685	0.000920027	0.00103238	0.00129982	2.29427e-05	0	247	49	41	21	19	13	187	15	0	0.532185
PPI	Increased	k__Bacteria|p__Actinobacteria|c__Coriobacteriia|o__Coriobacteriales|f__Coriobacteriaceae|g__Olsenella	7.16228589838136E-4;3.17741211465049E-4;-8.19125756332914E-5	345;1174;309	25;104;17	0.00479661663005419;0.143575249343707;0.75672259302683	0.133320267419309;0.520511539189228;0.914649295467646	2.820384306552248;1.462605894737802;-0.3097874537823871	miSeqRuns_UMCG-IBD-TIFN_Taxman_100Pc_GG13-PPI.txt;miSeqRuns_UMCG-IBD-TIFN_Taxman_100Pc_GG13-Reducing_stomach_acid2.txt;miSeqRuns_UMCG-IBD-TIFN_Taxman_100Pc_GG13-ZICPPI.txt	1828	146	Increased	2.27002	0.0232063	0.0666345	3.69041e-06	6.71529e-06	4.20351e-06	6.07383e-06	4.39259e-06	3.73218e-06	1.19626e-06	1.147e-05	4.60796e-05	1	156	24	18	14	15	3	123	7	60.2919	0.0805902
PPI	Decreased	k__Bacteria|p__Bacteroidetes|c__Bacteroidia|o__Bacteroidales|f__S24-7	-6.41438717448095E-4;-0.00577765264763453;-0.00337817304172731	345;1174;309	155;593;48	0.0749367038013555;0.122380063289964;0.549142338568664	0.487935685273521;0.486894847107947;0.843389593796883	-1.780851559746323;-1.5448602780410923;-0.5990458071112114	miSeqRuns_UMCG-IBD-TIFN_Taxman_100Pc_GG13-PPI.txt;miSeqRuns_UMCG-IBD-TIFN_Taxman_100Pc_GG13-Reducing_stomach_acid2.txt;miSeqRuns_UMCG-IBD-TIFN_Taxman_100Pc_GG13-ZICPPI.txt	1828	796	Decreased	-2.25799	0.0239461	0.0680848	0.00324248	0.00284225	0.00364806	0.00374731	0.00161886	0.000833578	0.00308778	0.0034485	4.48997e-05	0	906	62	137	39	39	8	730	15	0	0.664197
PPI	Increased	k__Bacteria|p__Firmicutes|c__Bacilli|o__Lactobacillales|f__Leuconostocaceae|g__Weissella|[s__hellenica/s__confusa]	3.27572440249718E-4;2.84566567033797E-4;7.70106823124347E-4	345;1174;309	16;45;11	0.0555919002385798;0.5181376999006;0.0291497063546206	0.43339698762805;0.901274647957303;0.38527629948432	1.9142211828200053;0.6462187475100734;2.1814559884214813	miSeqRuns_UMCG-IBD-TIFN_Taxman_100Pc_GG13-PPI.txt;miSeqRuns_UMCG-IBD-TIFN_Taxman_100Pc_GG13-Reducing_stomach_acid2.txt;miSeqRuns_UMCG-IBD-TIFN_Taxman_100Pc_GG13-ZICPPI.txt	1828	72	Increased	2.24636	0.0246809	0.0694926	1.21207e-05	1.14558e-05	1.71374e-05	1.27392e-05	3.18807e-06	1.65054e-05	9.08927e-07	3.02353e-06	0	0	76	15	12	7	7	4	57	4	47.2915	0.149984
PPI	Decreased	k__Bacteria|p__Firmicutes|c__Clostridia|o__Clostridiales|f__Clostridiaceae|g__SMB53	0.00171865197199051;-0.00457551536248307;-0.00852974883918417	345;1174;309	327;1134;281	0.54586086236134;0.0650431492876851;0.012815077494512	0.92759973542807;0.343030112166899;0.291397387119529	0.6039740991949696;-1.8449614313631038;-2.4888673359982767	miSeqRuns_UMCG-IBD-TIFN_Taxman_100Pc_GG13-PPI.txt;miSeqRuns_UMCG-IBD-TIFN_Taxman_100Pc_GG13-Reducing_stomach_acid2.txt;miSeqRuns_UMCG-IBD-TIFN_Taxman_100Pc_GG13-ZICPPI.txt	1828	1742	Decreased	-2.23943	0.0251279	0.0700707	0.00200713	0.00164764	0.00220912	0.00214761	0.00210911	0.00117284	0.00117074	0.0012357	5.21164e-07	0	2037	189	273	93	225	47	1539	49	59.5802	0.084244
PPI	Increased	k__Bacteria|p__Synergistetes|c__Synergistia|o__Synergistales|f__Synergistaceae|g__Synergistes	2.89421731425108E-4;4.29817528063136E-4;1.34209216098665E-4	345;1174;309	13;36;1	0.372835019718374;0.125677256116412;0.132112250030099	0.85246888535102;0.493132835456955;0.593550187667558	0.8911755115374161;1.531372906928568;1.5058244304702015	miSeqRuns_UMCG-IBD-TIFN_Taxman_100Pc_GG13-PPI.txt;miSeqRuns_UMCG-IBD-TIFN_Taxman_100Pc_GG13-Reducing_stomach_acid2.txt;miSeqRuns_UMCG-IBD-TIFN_Taxman_100Pc_GG13-ZICPPI.txt	1828	50	Increased	2.23349	0.0255164	0.0704765	4.63093e-06	1.12343e-05	6.12575e-06	1.61063e-05	0	1.84227e-06	2.9324e-06	1.28263e-05	0	0	48	12	10	8	0	1	38	3	0	0.81127
PPI	Decreased	k__Bacteria|p__Firmicutes|c__Clostridia|o__Clostridiales|f__Ruminococcaceae|g__Ruminococcus|s__bromii	0.016385253890254;-0.0297291029698641;-0.0213749447019069	345;1174;309	318;1091;219	0.430343665349158;0.0118404550382816;0.179440868748861	0.872809687468715;0.117646761260366;0.640802862510829	0.7886037040793296;-2.516863920154623;-1.342478587020434	miSeqRuns_UMCG-IBD-TIFN_Taxman_100Pc_GG13-PPI.txt;miSeqRuns_UMCG-IBD-TIFN_Taxman_100Pc_GG13-Reducing_stomach_acid2.txt;miSeqRuns_UMCG-IBD-TIFN_Taxman_100Pc_GG13-ZICPPI.txt	1828	1628	Decreased	-2.22635	0.0259905	0.0711089	0.0292744	0.0225616	0.0298997	0.0211137	0.0191522	0.00951521	0.0353892	0.0407208	0	0	1890	173	268	89	176	38	1446	46	47.3975	0.149412
PPI	Increased	k__Bacteria|p__Firmicutes|c__Clostridia|o__Clostridiales|f__Lachnospiraceae|g__Ruminococcus	0.00419819140011137;0.00560273181197254;0.0249129951014745	345;1174;309	345;1174;309	0.533134117864129;0.142663586852662;0.0627114837721894	0.922325394612758;0.520390340359889;0.499081836837491	0.6232288923961498;1.4659438413564252;1.8612315569633955	miSeqRuns_UMCG-IBD-TIFN_Taxman_100Pc_GG13-PPI.txt;miSeqRuns_UMCG-IBD-TIFN_Taxman_100Pc_GG13-Reducing_stomach_acid2.txt;miSeqRuns_UMCG-IBD-TIFN_Taxman_100Pc_GG13-ZICPPI.txt	1828	1828	Increased	2.21078	0.0270512	0.0726467	0.0144984	0.0192506	0.0106143	0.0117522	0.0293479	0.0351075	0.0165629	0.0151513	4.95217e-05	0	2133	210	289	99	240	60	1604	51	0	0.572911
PPI	Increased	k__Bacteria|p__Actinobacteria|c__Coriobacteriia|o__Coriobacteriales|f__Coriobacteriaceae|g__Olsenella|s__uli	3.49215294039446E-4;2.73689068396463E-4;-1.55352198655346E-5	345;1174;309	13;70;9	0.0242019329830099;0.113373976327938;0.925224620699598	0.297323010150912;0.468612872051122;0.967027665719455	2.2539083705628076;1.5832083832921287;-0.09385464762157053	miSeqRuns_UMCG-IBD-TIFN_Taxman_100Pc_GG13-PPI.txt;miSeqRuns_UMCG-IBD-TIFN_Taxman_100Pc_GG13-Reducing_stomach_acid2.txt;miSeqRuns_UMCG-IBD-TIFN_Taxman_100Pc_GG13-ZICPPI.txt	1828	92	Increased	2.20935	0.02715	0.0726467	2.05622e-06	3.39319e-06	2.49957e-06	4.73847e-06	1.80385e-06	1.46167e-06	6.17543e-07	3.05412e-06	3.31166e-05	1	94	16	9	10	8	2	77	4	26.3138	0.257405
PPI	Increased	k__Bacteria|p__Firmicutes|c__Bacilli|o__Lactobacillales|f__Streptococcaceae|g__Lactococcus|s__garvieae	0.00114013393727926;2.7232689748914E-4;-6.67615083846151E-5	345;1174;309	4;17;4	0.0121596098340114;0.089481114985596;0.554389422687006	0.23466793411618;0.412644448570908;0.843819161776547	2.5074781523785736;1.6981412009607806;-0.5911955221649534	miSeqRuns_UMCG-IBD-TIFN_Taxman_100Pc_GG13-PPI.txt;miSeqRuns_UMCG-IBD-TIFN_Taxman_100Pc_GG13-Reducing_stomach_acid2.txt;miSeqRuns_UMCG-IBD-TIFN_Taxman_100Pc_GG13-ZICPPI.txt	1828	25	Increased	2.20714	0.0273041	0.0726467	1.31159e-06	1.66029e-05	1.76121e-06	7.27905e-06	7.0166e-07	1.165e-07	1.47751e-07	5.40978e-05	0	0	23	7	2	4	3	1	18	2	56.9815	0.0978244
PPI	Increased	k__Bacteria|p__Actinobacteria|c__Coriobacteriia|o__Coriobacteriales|f__Coriobacteriaceae|g__Eggerthella	0.00613809848210291;0.00202525256736549;7.92028625444929E-4	345;1174;309	232;761;218	0.0155516675441015;0.182127314118426;0.850487721247106	0.254111201582246;0.588684773285844;0.946247389611042	2.419270573839482;1.334233590634689;0.18849616535088215	miSeqRuns_UMCG-IBD-TIFN_Taxman_100Pc_GG13-PPI.txt;miSeqRuns_UMCG-IBD-TIFN_Taxman_100Pc_GG13-Reducing_stomach_acid2.txt;miSeqRuns_UMCG-IBD-TIFN_Taxman_100Pc_GG13-ZICPPI.txt	1828	1211	Increased	2.19775	0.0279667	0.0737333	0.000753772	0.00136083	0.000595693	0.000983035	0.00151843	0.00192367	0.000704124	0.00143201	0	0	1414	149	191	69	170	42	1053	38	29.5393	0.2419
PPI	Decreased	k__Bacteria|p__Actinobacteria	-0.016822764108861;-0.0194868309612819;-0.0358293517033904	345;1174;309	345;1174;309	0.42069776828424;0.16312584137506;0.0855389911510745	0.869629952506614;0.553030562079065;0.542154774116346	-0.8052112800055854;-1.3946353104904095;-1.7194141300553922	miSeqRuns_UMCG-IBD-TIFN_Taxman_100Pc_GG13-PPI.txt;miSeqRuns_UMCG-IBD-TIFN_Taxman_100Pc_GG13-Reducing_stomach_acid2.txt;miSeqRuns_UMCG-IBD-TIFN_Taxman_100Pc_GG13-ZICPPI.txt	1828	1828	Decreased	-2.17438	0.0296763	0.0775357	0.116017	0.0946459	0.123811	0.108171	0.0934651	0.0682418	0.105831	0.0994558	0.184923	1	2135	210	289	99	241	60	1605	51	0	0.663049
PPI	Increased	k__Bacteria|p__Bacteroidetes|c__Flavobacteriia|o__Flavobacteriales|f__Weeksellaceae	3.13747889125439E-5;2.28562978574689E-4;-1.47014381282064E-4	345;1174;309	2;17;6	0.461458220089608;0.00455937222746805;0.302694448866497	0.889539186148404;0.0570553179497765;0.763024416155338	0.7364478063783035;2.836620832924265;-1.030672448905784	miSeqRuns_UMCG-IBD-TIFN_Taxman_100Pc_GG13-PPI.txt;miSeqRuns_UMCG-IBD-TIFN_Taxman_100Pc_GG13-Reducing_stomach_acid2.txt;miSeqRuns_UMCG-IBD-TIFN_Taxman_100Pc_GG13-ZICPPI.txt	1828	25	Increased	2.16943	0.0300497	0.0778103	4.72416e-07	9.89619e-07	4.40279e-07	1.92899e-06	1.11713e-06	1.32167e-07	5.43253e-08	1.74902e-07	0.00176279	1	24	7	1	5	5	1	18	1	59.5519	0.08439
PPI	Increased	k__Bacteria|p__Firmicutes|c__Bacilli|o__Lactobacillales|f__Leuconostocaceae|g__Weissella|s__paramesenteroides	-3.90772476182408E-5;2.20315753858102E-4;2.37605343206969E-4	345;1174;309	2;22;4	0.489925225799005;0.0630948157320665;0.0175811620081292	0.902924486185898;0.335964677981679;0.319199740083776	-0.6904277579024803;1.8585227503200725;2.374323025723144	miSeqRuns_UMCG-IBD-TIFN_Taxman_100Pc_GG13-PPI.txt;miSeqRuns_UMCG-IBD-TIFN_Taxman_100Pc_GG13-Reducing_stomach_acid2.txt;miSeqRuns_UMCG-IBD-TIFN_Taxman_100Pc_GG13-ZICPPI.txt	1828	28	Increased	2.16565	0.0303382	0.0778619	7.58628e-07	1.98381e-06	1.03684e-06	3.38283e-06	2.46058e-07	1.36167e-06	1.51211e-07	0	2.45108e-05	1	25	7	2	5	2	2	21	0	59.0011	0.0872402
PPI	Decreased	k__Bacteria|p__Tenericutes|c__RF3|o__ML615J-28	-0.00149221319590958;-5.19023672229513E-4;-0.00200157508569179	345;1174;309	65;305;37	0.0939401991953473;0.271914222721908;0.180364248285269	0.541095547365201;0.699366523346591;0.642186585086873	-1.6749695857230922;-1.0986649807662408;-1.3396343570115758	miSeqRuns_UMCG-IBD-TIFN_Taxman_100Pc_GG13-PPI.txt;miSeqRuns_UMCG-IBD-TIFN_Taxman_100Pc_GG13-Reducing_stomach_acid2.txt;miSeqRuns_UMCG-IBD-TIFN_Taxman_100Pc_GG13-ZICPPI.txt	1828	407	Decreased	-2.1589	0.0308578	0.0785008	8.12793e-05	2.57833e-05	8.16366e-05	3.20089e-05	0.000126322	3.54419e-05	4.23889e-05	2.33529e-06	0	0	466	29	60	21	31	4	375	4	0	0.563733
PPI	Decreased	k__Bacteria|p__Firmicutes|c__Clostridia|o__Clostridiales|f__Veillonellaceae|g__Dialister	-0.00746713871275833;-0.0118640961475545;-0.0398705946127496	345;1174;309	308;1079;281	0.613003748885448;0.314876831538262;0.00751005378915947	0.938249608898661;0.751144748316148;0.219381279300848	-0.5057904706822999;-1.0050415739062808;-2.67333800705702	miSeqRuns_UMCG-IBD-TIFN_Taxman_100Pc_GG13-PPI.txt;miSeqRuns_UMCG-IBD-TIFN_Taxman_100Pc_GG13-Reducing_stomach_acid2.txt;miSeqRuns_UMCG-IBD-TIFN_Taxman_100Pc_GG13-ZICPPI.txt	1828	1668	Decreased	-2.12429	0.0336463	0.0848504	0.0222522	0.0156565	0.0231041	0.0174326	0.0245264	0.0148388	0.0171871	0.0131707	0	0	1951	186	258	88	222	53	1471	45	48.719	0.142268
PPI	Decreased	k__Bacteria|p__Firmicutes|c__Clostridia|o__Clostridiales|f__Lachnospiraceae|g__Dorea|s__longicatena	0.00420053328475505;-0.0057050398776015;-0.0060717496548245	345;1174;309	329;1136;247	0.223656586466113;0.00781004496872921;0.214345737894219	0.725170591173581;0.0856518838954674;0.688145216062231	1.2168623660523705;-2.6601733215928616;-1.2417041509128381	miSeqRuns_UMCG-IBD-TIFN_Taxman_100Pc_GG13-PPI.txt;miSeqRuns_UMCG-IBD-TIFN_Taxman_100Pc_GG13-Reducing_stomach_acid2.txt;miSeqRuns_UMCG-IBD-TIFN_Taxman_100Pc_GG13-ZICPPI.txt	1828	1712	Decreased	-2.11372	0.0345393	0.0863515	0.00294152	0.00258356	0.00290839	0.00243526	0.00338754	0.00234973	0.00269284	0.00314654	2.81672e-05	0	1990	182	276	90	196	43	1518	49	64.4842	0.0598658
PPI	Increased	k__Bacteria|p__Actinobacteria|c__Coriobacteriia|o__Coriobacteriales|f__Coriobacteriaceae|g__Eggerthella|s__lenta	0.00579611985686422;0.00175345558657503;0.00191986485619209	345;1174;309	231;757;218	0.0216265305231516;0.248917869239152;0.661409564738578	0.284301695729656;0.676860412906463;0.883666329889024	2.296863977049141;1.1529817648464107;0.4379678839084724	miSeqRuns_UMCG-IBD-TIFN_Taxman_100Pc_GG13-PPI.txt;miSeqRuns_UMCG-IBD-TIFN_Taxman_100Pc_GG13-Reducing_stomach_acid2.txt;miSeqRuns_UMCG-IBD-TIFN_Taxman_100Pc_GG13-ZICPPI.txt	1828	1206	Increased	2.10189	0.035563	0.0881509	0.000748588	0.0013403	0.000592478	0.000961673	0.00151018	0.00190067	0.000694179	0.00141603	0	0	1408	149	190	69	170	42	1048	38	15.925	0.3044
PPI	Decreased	k__Bacteria|p__Actinobacteria|c__Actinobacteria|o__Bifidobacteriales|f__Bifidobacteriaceae|g__Bifidobacterium|s__longum	-0.00538723362528776;-0.00761883691748687;-0.010866345842845	345;1174;309	327;1135;282	0.527487463137078;0.135776736095511;0.141354764033769	0.921846093914377;0.511423913447209;0.600532659939643	-0.6318460747743601;-1.4917040913094217;-1.4707646924186057	miSeqRuns_UMCG-IBD-TIFN_Taxman_100Pc_GG13-PPI.txt;miSeqRuns_UMCG-IBD-TIFN_Taxman_100Pc_GG13-Reducing_stomach_acid2.txt;miSeqRuns_UMCG-IBD-TIFN_Taxman_100Pc_GG13-ZICPPI.txt	1828	1744	Decreased	-2.07463	0.038021	0.093445	0.00924566	0.00768074	0.00921589	0.00752658	0.00693322	0.00626348	0.0112848	0.00964736	5.3801e-05	0	2035	194	274	92	222	54	1539	48	0	0.785262
PPI	Decreased	k__Bacteria|p__Proteobacteria|c__Deltaproteobacteria|o__Desulfovibrionales|f__Desulfovibrionaceae|g__Desulfovibrio|s__D168	-0.00457372342912443;-0.0021663993403663;-4.55068926311838E-4	345;1174;309	22;71;6	0.094307084205716;0.137577766455797;0.727579319967609	0.541542520346934;0.514286187925057;0.905081108699775	-1.673102679239725;-1.4848718793760964;-0.34834737371875446	miSeqRuns_UMCG-IBD-TIFN_Taxman_100Pc_GG13-PPI.txt;miSeqRuns_UMCG-IBD-TIFN_Taxman_100Pc_GG13-Reducing_stomach_acid2.txt;miSeqRuns_UMCG-IBD-TIFN_Taxman_100Pc_GG13-ZICPPI.txt	1828	99	Decreased	-2.06004	0.0393951	0.0960086	0.000211771	4.69707e-05	0.000200005	6.52961e-05	9.19627e-05	1.48892e-05	0.000355445	4.9141e-05	0	0	117	6	20	2	4	2	93	2	0	0.643484
PPI	Increased	k__Bacteria|p__Bacteroidetes|c__Flavobacteriia|o__Flavobacteriales	3.13747889125439E-5;2.20321565711747E-4;-1.47014381282064E-4	345;1174;309	2;20;6	0.461458220089608;0.00710163372039869;0.302694448866497	0.889539186148404;0.0796408946341777;0.763024416155338	0.7364478063783035;2.6920404228145784;-1.030672448905784	miSeqRuns_UMCG-IBD-TIFN_Taxman_100Pc_GG13-PPI.txt;miSeqRuns_UMCG-IBD-TIFN_Taxman_100Pc_GG13-Reducing_stomach_acid2.txt;miSeqRuns_UMCG-IBD-TIFN_Taxman_100Pc_GG13-ZICPPI.txt	1828	28	Increased	2.05357	0.0400175	0.0967126	4.86136e-07	9.89619e-07	4.60763e-07	1.92899e-06	1.11713e-06	1.32167e-07	5.43253e-08	1.74902e-07	0.00463129	1	27	7	1	5	5	1	21	1	56.8461	0.0985403
PPI	Increased	k__Bacteria|p__Proteobacteria|c__Betaproteobacteria|o__Neisseriales|f__Neisseriaceae|g__Neisseria	8.48261490052313E-6;2.37694852167028E-4;9.66200773462717E-5	345;1174;309	14;28;8	0.967001642208692;0.0179482833270243;0.785477931094927	0.994596915079819;0.153634035582622;0.924825737052633	0.04136910516700846;2.3666833142115684;0.2721873980199773	miSeqRuns_UMCG-IBD-TIFN_Taxman_100Pc_GG13-PPI.txt;miSeqRuns_UMCG-IBD-TIFN_Taxman_100Pc_GG13-Reducing_stomach_acid2.txt;miSeqRuns_UMCG-IBD-TIFN_Taxman_100Pc_GG13-ZICPPI.txt	1828	50	Increased	2.02652	0.042711	0.102369	1.85619e-06	3.0333e-06	6.58512e-07	3.38933e-06	7.11069e-06	4.4898e-06	1.92943e-06	6.28627e-07	0	0	62	8	12	4	7	2	43	2	0	0.456078
PPI	Decreased	k__Bacteria|p__Bacteroidetes|c__Bacteroidia|o__Bacteroidales|f__Odoribacteraceae|g__Odoribacter	-0.00508657158649352;2.03094493554816E-4;-0.00497434519840372	345;1174;309	223;866;174	0.0016439040635755;0.857541445454902;0.0544575111220084	0.0641122584794446;0.990483578093088;0.470710495702544	-3.1480022884799905;0.17950467675359963;-1.9231794979649253	miSeqRuns_UMCG-IBD-TIFN_Taxman_100Pc_GG13-PPI.txt;miSeqRuns_UMCG-IBD-TIFN_Taxman_100Pc_GG13-Reducing_stomach_acid2.txt;miSeqRuns_UMCG-IBD-TIFN_Taxman_100Pc_GG13-ZICPPI.txt	1828	1263	Decreased	-2.01444	0.0439637	0.104508	0.00031545	0.000226249	0.000280986	0.00023556	0.000553546	0.000328941	0.000245095	8.73615e-05	5.27409e-07	0	1485	113	202	67	141	28	1142	18	79.1293	0.00830081
PPI	Decreased	k__Bacteria|p__Proteobacteria|c__Alphaproteobacteria	-0.00112694613905255;-0.00158695237687787;-0.00214082173933221	345;1174;309	163;697;146	0.33359859643654;0.212111171800507;0.151089993317275	0.818523457013772;0.631610160609815;0.617632434377664	-0.9668908596221638;-1.2477812641025632;-1.4356920328019358	miSeqRuns_UMCG-IBD-TIFN_Taxman_100Pc_GG13-PPI.txt;miSeqRuns_UMCG-IBD-TIFN_Taxman_100Pc_GG13-Reducing_stomach_acid2.txt;miSeqRuns_UMCG-IBD-TIFN_Taxman_100Pc_GG13-ZICPPI.txt	1828	1006	Decreased	-2.01028	0.0444011	0.104689	0.00047205	0.000513251	0.000410707	0.000447148	0.000911347	0.000975307	0.000333898	9.79745e-05	0	0	1171	96	141	52	122	24	908	20	0	0.774218
PPI	Decreased	k__Bacteria|p__Firmicutes|c__Erysipelotrichi|o__Erysipelotrichales|f__Erysipelotrichaceae|g__p-75-a5	-2.29966804139182E-4;-4.54425058292083E-4;-4.82225012002079E-5	345;1174;309	9;35;2	0.29708750580316;0.115692974205692;0.47998015262547	0.797062305050999;0.472666690669306;0.828269952602515	-1.0426994648914962;-1.5731116224712962;-0.7063344851780468	miSeqRuns_UMCG-IBD-TIFN_Taxman_100Pc_GG13-PPI.txt;miSeqRuns_UMCG-IBD-TIFN_Taxman_100Pc_GG13-Reducing_stomach_acid2.txt;miSeqRuns_UMCG-IBD-TIFN_Taxman_100Pc_GG13-ZICPPI.txt	1828	46	Decreased	-2.00407	0.0450629	0.105393	5.67144e-06	9.25452e-07	7.91097e-06	1.96308e-06	2.60996e-07	0	1.8528e-06	0	0	0	53	2	8	2	2	0	43	0	0	0.977982
PPI	Increased	k__Bacteria|p__Firmicutes|c__Erysipelotrichi|o__Erysipelotrichales|f__Erysipelotrichaceae|g__Coprobacillus	0.00503794474663584;0.00134470507236265;-6.73506955777876E-4	345;1174;309	265;826;208	0.00617842711945238;0.248464884047601;0.769586632224457	0.157360756021971;0.676739881550702;0.918272421634549	2.7381586043019093;1.1540860693640695;-0.29291564223615935	miSeqRuns_UMCG-IBD-TIFN_Taxman_100Pc_GG13-PPI.txt;miSeqRuns_UMCG-IBD-TIFN_Taxman_100Pc_GG13-Reducing_stomach_acid2.txt;miSeqRuns_UMCG-IBD-TIFN_Taxman_100Pc_GG13-ZICPPI.txt	1828	1299	Increased	1.99399	0.0461531	0.106963	0.00054257	0.000987425	0.000428955	0.00061445	0.00112704	0.00176446	0.000477789	0.000797275	0	0	1522	153	218	70	165	40	1139	43	59.5079	0.0846175
PPI	Increased	k__Bacteria|p__Proteobacteria|c__Gammaproteobacteria|o__Enterobacteriales|f__Enterobacteriaceae|g__Raoultella	1.37510170111575E-5;4.65133673437092E-4;4.59725601042843E-4	345;1174;309	3;20;9	0.950680904468312;0.0538442316053193;0.30808456122379	0.99409550370926;0.308024875825773;0.765646554522569	0.06185173409619629;1.9280875957361996;1.0192494385178688	miSeqRuns_UMCG-IBD-TIFN_Taxman_100Pc_GG13-PPI.txt;miSeqRuns_UMCG-IBD-TIFN_Taxman_100Pc_GG13-Reducing_stomach_acid2.txt;miSeqRuns_UMCG-IBD-TIFN_Taxman_100Pc_GG13-ZICPPI.txt	1828	32	Increased	1.99108	0.0464717	0.106963	3.37634e-06	1.93559e-05	3.54935e-06	2.17982e-05	4.09176e-06	3.09672e-05	2.13621e-06	9.54902e-07	0	0	30	9	1	4	6	3	23	2	0	0.671728
PPI	Decreased	k__Bacteria|p__Actinobacteria|c__Coriobacteriia|o__Coriobacteriales|f__Coriobacteriaceae|g__Adlercreutzia	-6.33971494218067E-4;-0.0034654372326458;-0.00415679400035897	345;1174;309	273;1029;155	0.790361652193279;0.196901663044806;0.0424845082115884	0.985714199137787;0.610565331519713;0.433481698073461	-0.26584101732701193;-1.2904292465017049;-2.028742661308253	miSeqRuns_UMCG-IBD-TIFN_Taxman_100Pc_GG13-PPI.txt;miSeqRuns_UMCG-IBD-TIFN_Taxman_100Pc_GG13-Reducing_stomach_acid2.txt;miSeqRuns_UMCG-IBD-TIFN_Taxman_100Pc_GG13-ZICPPI.txt	1828	1457	Decreased	-1.98373	0.0472858	0.107127	0.00128027	0.00099535	0.00155065	0.00156503	0.000602746	0.000277813	0.000839497	0.000733661	2.2062e-06	0	1675	140	234	84	131	21	1310	35	0	0.383566
PPI	Increased	k__Bacteria|p__Proteobacteria|c__Gammaproteobacteria|o__Enterobacteriales|f__Enterobacteriaceae|g__Proteus	-9.64337669286134E-6;2.11171688044821E-4;0.00116282801828046	345;1174;309	1;6;24	0.813779900326703;0.0279065267154927;0.431313813286753	0.989823287883005;0.207126186196032;0.806597140548405	-0.23555254570037668;2.1985978960046495;0.7869454271430345	miSeqRuns_UMCG-IBD-TIFN_Taxman_100Pc_GG13-PPI.txt;miSeqRuns_UMCG-IBD-TIFN_Taxman_100Pc_GG13-Reducing_stomach_acid2.txt;miSeqRuns_UMCG-IBD-TIFN_Taxman_100Pc_GG13-ZICPPI.txt	1828	31	Increased	1.98316	0.0473499	0.107127	1.16275e-05	6.73008e-05	2.68426e-07	6.51639e-06	7.6145e-05	0.000224801	7.82007e-08	0	0	0	41	7	1	1	17	6	23	0	0	0.454824
PPI	Increased	k__Bacteria|p__Proteobacteria|c__Gammaproteobacteria|o__Enterobacteriales|f__Enterobacteriaceae|[g__Klebsiella/g__Pantoea/g__Enterobacter]	1.18974410795455E-4;5.45655213454104E-5;2.61015550003079E-4	345;1174;309	3;8;8	0.153097077509921;0.393355637505896;0.100247222170915	0.661489904974496;0.821632008854607;0.555663965551247	1.428677048365568;0.8535477178083404;1.6436562772222383	miSeqRuns_UMCG-IBD-TIFN_Taxman_100Pc_GG13-PPI.txt;miSeqRuns_UMCG-IBD-TIFN_Taxman_100Pc_GG13-Reducing_stomach_acid2.txt;miSeqRuns_UMCG-IBD-TIFN_Taxman_100Pc_GG13-ZICPPI.txt	1828	19	Increased	1.98047	0.0476513	0.107127	4.90253e-07	1.29571e-06	3.31673e-07	6.11111e-07	1.6992e-06	2.62833e-06	7.19723e-08	1.05686e-06	0	0	16	8	1	2	4	5	11	1	0	0.460928
PPI	Decreased	k__Bacteria|p__Bacteroidetes|c__Bacteroidia|o__Bacteroidales|[f__Bacteroidaceae/f__Rikenellaceae]	-0.00262989367577938;-2.43962485143933E-4;-0.00117491999501635	345;1174;309	181;664;122	0.00435665599733707;0.715093873867181;0.28219337666213	0.126273498174245;0.980533652313046;0.749618306590532	-2.8511124435556128;-0.36502348724556977;-1.07540515094639	miSeqRuns_UMCG-IBD-TIFN_Taxman_100Pc_GG13-PPI.txt;miSeqRuns_UMCG-IBD-TIFN_Taxman_100Pc_GG13-Reducing_stomach_acid2.txt;miSeqRuns_UMCG-IBD-TIFN_Taxman_100Pc_GG13-ZICPPI.txt	1828	967	Decreased	-1.97328	0.0484632	0.108114	8.78865e-05	5.80656e-05	7.81108e-05	5.52225e-05	0.000141123	8.13269e-05	7.9855e-05	3.62183e-05	3.92778e-07	0	1142	84	163	50	101	18	878	16	63.7991	0.0631423
PPI	Increased	k__Bacteria|p__Actinobacteria|c__Coriobacteriia|o__Coriobacteriales|f__Coriobacteriaceae|g__Collinsella|s__stercoris	0.00308560378964601;0.00193936944864245;4.40800827647589E-4	345;1174;309	42;111;51	0.297616611881896;0.0750512667325204;0.898147014798059	0.797062305050999;0.372110472182796;0.959158915846697	1.0415580813065377;1.7801509101347484;0.12800247448258065	miSeqRuns_UMCG-IBD-TIFN_Taxman_100Pc_GG13-PPI.txt;miSeqRuns_UMCG-IBD-TIFN_Taxman_100Pc_GG13-Reducing_stomach_acid2.txt;miSeqRuns_UMCG-IBD-TIFN_Taxman_100Pc_GG13-ZICPPI.txt	1828	204	Increased	1.93171	0.0533947	0.118207	0.000205106	0.000304555	8.77051e-05	0.000310833	0.000543536	0.000238438	0.000359587	0.000370155	0	0	234	35	32	11	35	14	167	10	0	0.763897
PPI	Increased	k__Bacteria|p__Proteobacteria|c__Gammaproteobacteria|o__Cardiobacteriales|f__Cardiobacteriaceae|g__Cardiobacterium	2.17841086828022E-4;1.61458956128992E-5;1.19205013334126E-4	345;1174;309	7;10;1	0.0298959029757261;0.787849234426961;0.0665941281537282	0.320717079487445;0.990483578093088;0.499081836837491	2.17146681561963;0.26910454315017246;1.8344034481585942	miSeqRuns_UMCG-IBD-TIFN_Taxman_100Pc_GG13-PPI.txt;miSeqRuns_UMCG-IBD-TIFN_Taxman_100Pc_GG13-Reducing_stomach_acid2.txt;miSeqRuns_UMCG-IBD-TIFN_Taxman_100Pc_GG13-ZICPPI.txt	1828	18	Increased	1.91321	0.055721	0.1223	2.45456e-07	7.92667e-07	2.90765e-07	5.40404e-07	0	9.51667e-07	2.81609e-07	1.09529e-06	0	0	17	5	4	1	0	1	13	3	55.4798	0.105804
PPI	Increased	k__Bacteria|p__Firmicutes|c__Bacilli|o__Lactobacillales|f__Leuconostocaceae|g__Weissella|s__hellenica	1.62358420651077E-4;3.52018035776801E-4;0.00107730042871622	345;1174;309	16;56;17	0.385121982120101;0.502911177609225;0.0156233245052666	0.85246888535102;0.89068091237108;0.304997778878424	0.8684976063355047;0.6699162539998361;2.4175980428109622	miSeqRuns_UMCG-IBD-TIFN_Taxman_100Pc_GG13-PPI.txt;miSeqRuns_UMCG-IBD-TIFN_Taxman_100Pc_GG13-Reducing_stomach_acid2.txt;miSeqRuns_UMCG-IBD-TIFN_Taxman_100Pc_GG13-ZICPPI.txt	1828	89	Increased	1.90814	0.0563726	0.1223	1.6689e-05	2.1807e-05	2.33813e-05	2.9257e-05	5.33553e-06	2.57971e-05	1.26325e-06	2.65098e-06	2.32393e-05	1	99	15	14	7	11	6	74	2	41.2946	0.18206
PPI	Decreased	k__Bacteria|p__Firmicutes|c__Clostridia|o__Clostridiales|f__Lachnospiraceae|[g__Dorea/g__Coprococcus]	-2.48931979772313E-4;-8.87616887051028E-4;-2.5598715039095E-4	345;1174;309	197;721;99	0.704084630467345;0.0582929239297295;0.584775278353513	0.963407262376535;0.321776940092107;0.853179243153759	-0.37981246274960817;-1.8934885917800952;-0.5464228912656601	miSeqRuns_UMCG-IBD-TIFN_Taxman_100Pc_GG13-PPI.txt;miSeqRuns_UMCG-IBD-TIFN_Taxman_100Pc_GG13-Reducing_stomach_acid2.txt;miSeqRuns_UMCG-IBD-TIFN_Taxman_100Pc_GG13-ZICPPI.txt	1828	1017	Decreased	-1.90709	0.056509	0.1223	5.37412e-05	6.9643e-05	5.00782e-05	5.40302e-05	8.77627e-05	8.26289e-05	3.89955e-05	8.46728e-05	0	0	1178	86	170	45	81	16	927	25	0	0.822364
PPI	Increased	k__Bacteria|p__Bacteroidetes|c__Bacteroidia|o__Bacteroidales|f__Prevotellaceae|g__Prevotella|s__melaninogenica	-4.38548983984188E-5;1.47747152144908E-4;4.03720083938281E-4	345;1174;309	2;15;4	0.698059969878003;0.155335811544068;0.024568131734334	0.961489319677356;0.539656162063589;0.374178467064881	-0.38794062981757843;1.4209344677368647;2.2481263901607274	miSeqRuns_UMCG-IBD-TIFN_Taxman_100Pc_GG13-PPI.txt;miSeqRuns_UMCG-IBD-TIFN_Taxman_100Pc_GG13-Reducing_stomach_acid2.txt;miSeqRuns_UMCG-IBD-TIFN_Taxman_100Pc_GG13-ZICPPI.txt	1828	21	Increased	1.89449	0.0581597	0.12494	7.53378e-07	2.41269e-06	9.33985e-07	9.00505e-07	1.34855e-07	6.95857e-06	5.97363e-07	0	0.0130178	1	17	7	2	4	1	3	14	0	44.9722	0.16247
PPI	Decreased	k__Bacteria|p__Firmicutes|c__Clostridia|o__Clostridiales|f__Veillonellaceae|g__Succiniclasticum	-3.66449945349836E-4;-0.00221829456309876;-0.00445770586178771	345;1174;309	28;79;15	0.889494686405767;0.172855020408413;0.0745638958392618	0.991109715557945;0.572114417980678;0.516732859404705	-0.13894363906516027;-1.3630872314564186;-1.7831376691973226	miSeqRuns_UMCG-IBD-TIFN_Taxman_100Pc_GG13-PPI.txt;miSeqRuns_UMCG-IBD-TIFN_Taxman_100Pc_GG13-Reducing_stomach_acid2.txt;miSeqRuns_UMCG-IBD-TIFN_Taxman_100Pc_GG13-ZICPPI.txt	1828	122	Decreased	-1.88585	0.0593148	0.126485	0.000287013	4.28759e-05	0.00026149	2.29622e-05	0.000359177	1.57217e-05	0.000321775	0.000113478	0	0	146	8	24	1	10	4	112	3	0	0.47226
PPI	Decreased	k__Bacteria|p__Actinobacteria|c__Actinobacteria|o__Actinomycetales|f__Actinomycetaceae|g__Mobiluncus	-2.6329525689128E-4;-2.61224447704491E-4;-1.3682385247848E-4	345;1174;309	18;86;7	0.300285748610005;0.183937795817278;0.381235358563967	0.797062305050999;0.592913103012239;0.792161944430423	-1.035820807089068;-1.3287277815776029;-0.8756223729681146	miSeqRuns_UMCG-IBD-TIFN_Taxman_100Pc_GG13-PPI.txt;miSeqRuns_UMCG-IBD-TIFN_Taxman_100Pc_GG13-Reducing_stomach_acid2.txt;miSeqRuns_UMCG-IBD-TIFN_Taxman_100Pc_GG13-ZICPPI.txt	1828	111	Decreased	-1.87483	0.0608158	0.128205	3.26505e-06	5.85286e-07	3.75906e-06	8.76263e-07	1.41098e-06	0	2.9736e-06	7.0902e-07	1.03893e-05	1	127	5	15	3	7	0	105	2	0	0.95592
PPI	Increased	k__Bacteria|p__Firmicutes|c__Bacilli|o__Lactobacillales|f__Enterococcaceae|g__Enterococcus|s__haemoperoxidus	3.44573982986377E-4;4.46470503201112E-4;2.27872714960718E-4	345;1174;309	8;27;17	0.0105814398548314;0.522466598266771;0.545715460486938	0.226382347522793;0.90128881321625;0.843389593796883	2.556225903492116;0.6395478460788647;0.604192810194262	miSeqRuns_UMCG-IBD-TIFN_Taxman_100Pc_GG13-PPI.txt;miSeqRuns_UMCG-IBD-TIFN_Taxman_100Pc_GG13-Reducing_stomach_acid2.txt;miSeqRuns_UMCG-IBD-TIFN_Taxman_100Pc_GG13-ZICPPI.txt	1828	52	Increased	1.87144	0.0612836	0.128205	2.97239e-05	1.50048e-05	4.29346e-05	2.55714e-05	6.01089e-06	8.51393e-06	3.58131e-07	2.12941e-06	0	0	52	16	4	9	13	4	35	3	47.4522	0.149116
PPI	Decreased	k__Bacteria|p__Actinobacteria|c__Actinobacteria|o__Bifidobacteriales|f__Bifidobacteriaceae|g__Bifidobacterium|s__adolescentis	-0.0111316226977338;-0.00998676147881916;-0.0229609706976333	345;1174;309	328;1143;282	0.377812497857785;0.26267148107318;0.1523769000254	0.85246888535102;0.69207487043383;0.619649149732116	-0.8819340028694427;-1.120099224506244;-1.431186051725313	miSeqRuns_UMCG-IBD-TIFN_Taxman_100Pc_GG13-PPI.txt;miSeqRuns_UMCG-IBD-TIFN_Taxman_100Pc_GG13-Reducing_stomach_acid2.txt;miSeqRuns_UMCG-IBD-TIFN_Taxman_100Pc_GG13-ZICPPI.txt	1828	1753	Decreased	-1.8692	0.061595	0.128205	0.0213611	0.0162649	0.0217811	0.0177661	0.0244857	0.0148907	0.017193	0.0149677	3.83853e-05	0	2044	195	276	93	221	55	1547	47	0	0.745719
PPI	Decreased	k__Bacteria|p__Actinobacteria|c__Actinobacteria|o__Bifidobacteriales|f__Bifidobacteriaceae|g__Bifidobacterium|s__breve	-0.00283909948505589;-0.00392356595151575;-0.00921915586830194	345;1174;309	317;1119;271	0.586541502813313;0.23763376720329;0.0959695349173684	0.93661219583517;0.664007109822245;0.547888842709427	-0.5438546434607101;-1.180921857973991;-1.6647154710006853	miSeqRuns_UMCG-IBD-TIFN_Taxman_100Pc_GG13-PPI.txt;miSeqRuns_UMCG-IBD-TIFN_Taxman_100Pc_GG13-Reducing_stomach_acid2.txt;miSeqRuns_UMCG-IBD-TIFN_Taxman_100Pc_GG13-ZICPPI.txt	1828	1707	Decreased	-1.86708	0.0618898	0.128205	0.00400179	0.00330517	0.00391793	0.00340286	0.00407141	0.00307918	0.00425566	0.00338142	7.26756e-05	0	1995	184	267	88	215	50	1513	46	0	0.613967
PPI	Decreased	k__Bacteria|p__Firmicutes|c__Clostridia|o__Clostridiales|f__Peptostreptococcaceae	0.0167156454244127;-0.0238701227252329;-0.0265368835984251	345;1174;309	343;1171;305	0.145832865770318;0.0313686364991072;0.0628378211721518	0.655463531166621;0.221769498905061;0.499081836837491	1.4544092903122108;-2.1523647657063782;-1.860337287887593	miSeqRuns_UMCG-IBD-TIFN_Taxman_100Pc_GG13-PPI.txt;miSeqRuns_UMCG-IBD-TIFN_Taxman_100Pc_GG13-Reducing_stomach_acid2.txt;miSeqRuns_UMCG-IBD-TIFN_Taxman_100Pc_GG13-ZICPPI.txt	1828	1819	Decreased	-1.85791	0.0631815	0.128447	0.0328545	0.0270519	0.0376212	0.0326378	0.0300987	0.0227958	0.0174219	0.0212161	0.000705213	0	2127	206	288	98	239	58	1600	50	70.4011	0.0340986
PPI	Decreased	k__Bacteria|p__Firmicutes|c__Clostridia|o__Clostridiales|f__Ruminococcaceae|g__Gemmiger|s__formicilis	-0.00116334804170301;-8.44750949343164E-4;-1.58135693917228E-4	345;1174;309	220;790;98	0.172335046973361;0.145039126228152;0.814081929223437	0.684630929797919;0.520959260300269;0.933511713682577	-1.364739159806092;-1.4572799240625158;-0.23516337785057795	miSeqRuns_UMCG-IBD-TIFN_Taxman_100Pc_GG13-PPI.txt;miSeqRuns_UMCG-IBD-TIFN_Taxman_100Pc_GG13-Reducing_stomach_acid2.txt;miSeqRuns_UMCG-IBD-TIFN_Taxman_100Pc_GG13-ZICPPI.txt	1828	1108	Decreased	-1.85743	0.0632505	0.128447	6.55022e-05	5.25645e-05	7.14089e-05	6.54165e-05	4.18492e-05	3.58782e-05	6.32551e-05	4.72475e-05	0	0	1274	97	191	54	78	18	1005	25	0	0.743993
PPI	Increased	k__Bacteria|p__Proteobacteria|c__Betaproteobacteria|o__Neisseriales|f__Neisseriaceae	1.15396588691883E-4;2.04457310800741E-4;1.11280016279386E-4	345;1174;309	15;34;12	0.585509824976377;0.0584858634065552;0.800970397184869	0.93661219583517;0.322442553963918;0.930424680220198	0.5453543581674751;1.8920384095416405;0.2520914258397839	miSeqRuns_UMCG-IBD-TIFN_Taxman_100Pc_GG13-PPI.txt;miSeqRuns_UMCG-IBD-TIFN_Taxman_100Pc_GG13-Reducing_stomach_acid2.txt;miSeqRuns_UMCG-IBD-TIFN_Taxman_100Pc_GG13-ZICPPI.txt	1828	61	Increased	1.85683	0.063335	0.128447	2.5354e-06	3.55377e-06	8.1694e-07	3.38933e-06	1.09274e-05	5.70147e-06	1.92943e-06	1.34627e-06	0	0	72	10	12	4	9	3	51	3	0	0.781553
PPI	Increased	k__Bacteria|p__Firmicutes|c__Bacilli|o__Lactobacillales|f__Leuconostocaceae|g__Leuconostoc	0.00209927327833484;3.85811872043629E-4;0.00114609465147639	345;1174;309	167;648;138	0.0220536661537814;0.668650050968546;0.25386998472726	0.284301695729656;0.972032149936472;0.725035498162732	2.2894423109768938;0.42800146888000357;1.1409998516566429	miSeqRuns_UMCG-IBD-TIFN_Taxman_100Pc_GG13-PPI.txt;miSeqRuns_UMCG-IBD-TIFN_Taxman_100Pc_GG13-Reducing_stomach_acid2.txt;miSeqRuns_UMCG-IBD-TIFN_Taxman_100Pc_GG13-ZICPPI.txt	1828	953	Increased	1.80672	0.0708066	0.142602	0.000196012	0.000172765	0.00019631	0.000213989	0.000310138	0.000136471	9.97319e-05	0.000135442	0.000164332	0	1070	118	139	58	101	34	830	26	42.2364	0.177073
PPI	Increased	k__Bacteria|p__Firmicutes|c__Erysipelotrichi|o__Erysipelotrichales|f__Erysipelotrichaceae|g__Eubacterium	0.0188209040349621;0.0147698453054256;0.00645509291790914	345;1174;309	328;1095;277	0.233104687543874;0.175955201583922;0.631347335308055	0.733152070053418;0.577374796214614;0.873669445332931	1.1923993691557229;1.3533144287638912;0.47983132707813725	miSeqRuns_UMCG-IBD-TIFN_Taxman_100Pc_GG13-PPI.txt;miSeqRuns_UMCG-IBD-TIFN_Taxman_100Pc_GG13-Reducing_stomach_acid2.txt;miSeqRuns_UMCG-IBD-TIFN_Taxman_100Pc_GG13-ZICPPI.txt	1828	1700	Increased	1.79983	0.0718871	0.14378	0.0180233	0.0220205	0.0187294	0.0244075	0.0145654	0.0166146	0.0182803	0.0237468	0	0	1981	195	273	92	216	53	1492	50	0	0.885096
PPI	Increased	k__Bacteria|p__Firmicutes|c__Clostridia|o__Clostridiales|f__Lachnospiraceae|g__Clostridium|s__clostridioforme	7.4078148821478E-4;7.13044897013778E-4;0.00222911311172465	345;1174;309	309;1079;255	0.456091440453308;0.337959629013705;0.0879483937174271	0.889539186148404;0.782329412887852;0.542154774116346	0.7452982472982683;0.9582045387106889;1.7063206590041924	miSeqRuns_UMCG-IBD-TIFN_Taxman_100Pc_GG13-PPI.txt;miSeqRuns_UMCG-IBD-TIFN_Taxman_100Pc_GG13-Reducing_stomach_acid2.txt;miSeqRuns_UMCG-IBD-TIFN_Taxman_100Pc_GG13-ZICPPI.txt	1828	1643	Increased	1.79322	0.0729379	0.144882	0.000253122	0.000335693	0.000205682	0.000235346	0.000574472	0.000605531	0.000161612	0.000213029	2.11277e-06	0	1905	183	261	90	197	50	1447	43	0	0.557239
PPI	Decreased	k__Bacteria|p__Proteobacteria|c__Deltaproteobacteria	-0.00352584843167097;-0.00418503219635351;-6.44532457817615E-4	345;1174;309	284;985;174	0.420882987054728;0.0916377280938391;0.86410580528757	0.869629952506614;0.415875605423067;0.9502998918379	-0.8048902988517741;-1.68682125008884;-0.1711500206385075	miSeqRuns_UMCG-IBD-TIFN_Taxman_100Pc_GG13-PPI.txt;miSeqRuns_UMCG-IBD-TIFN_Taxman_100Pc_GG13-Reducing_stomach_acid2.txt;miSeqRuns_UMCG-IBD-TIFN_Taxman_100Pc_GG13-ZICPPI.txt	1828	1443	Decreased	-1.77184	0.0764203	0.14728	0.00145496	0.00121185	0.00137026	0.000948902	0.00119002	0.001068	0.00199094	0.00189152	0	0	1668	145	244	79	137	31	1287	35	0	0.825689
PPI	Increased	k__Bacteria|p__Firmicutes	0.0248631969968534;0.00992540753845296;0.034295054514651	345;1174;309	345;1174;309	0.23295513193438;0.465190973985652;0.10493320976216	0.733152070053418;0.859772603705625;0.559178036575454	1.1927810540369825;0.7303259431484367;1.621393799233516	miSeqRuns_UMCG-IBD-TIFN_Taxman_100Pc_GG13-PPI.txt;miSeqRuns_UMCG-IBD-TIFN_Taxman_100Pc_GG13-Reducing_stomach_acid2.txt;miSeqRuns_UMCG-IBD-TIFN_Taxman_100Pc_GG13-ZICPPI.txt	1828	1828	Increased	1.77008	0.0767134	0.14728	0.757866	0.769419	0.762604	0.771187	0.724901	0.750138	0.767731	0.78867	0.540114	0	2135	210	289	99	241	60	1605	51	0	0.483882
PPI	Increased	k__Bacteria|p__Firmicutes|c__Clostridia|o__Clostridiales|f__Veillonellaceae|g__Phascolarctobacterium	0.00144837182965221;0.00264456884842928;0.0141886836107796	345;1174;309	199;780;130	0.787965265532826;0.497471396789982;0.00698804574469259	0.985022355310484;0.885404612834199;0.21512430054046	0.2689537607098987;0.6784736951836092;2.697413403208409	miSeqRuns_UMCG-IBD-TIFN_Taxman_100Pc_GG13-PPI.txt;miSeqRuns_UMCG-IBD-TIFN_Taxman_100Pc_GG13-Reducing_stomach_acid2.txt;miSeqRuns_UMCG-IBD-TIFN_Taxman_100Pc_GG13-ZICPPI.txt	1828	1109	Increased	1.76958	0.0767963	0.14728	0.00220023	0.00267369	0.00228863	0.00227557	0.0021109	0.00364085	0.00194589	0.00230869	0	0	1246	126	171	72	98	28	977	26	57.24	0.0964591
PPI	Decreased	k__Bacteria|p__Proteobacteria|c__Deltaproteobacteria|o__Desulfovibrionales|f__Desulfovibrionaceae	-0.00352584843167097;-0.00418469783117935;-6.07349611731858E-4	345;1174;309	284;985;173	0.420882987054728;0.0916634033692147;0.871952428351315	0.869629952506614;0.415875605423067;0.950743273496322	-0.8048902988517741;-1.6866877782877103;-0.16117898994114982	miSeqRuns_UMCG-IBD-TIFN_Taxman_100Pc_GG13-PPI.txt;miSeqRuns_UMCG-IBD-TIFN_Taxman_100Pc_GG13-Reducing_stomach_acid2.txt;miSeqRuns_UMCG-IBD-TIFN_Taxman_100Pc_GG13-ZICPPI.txt	1828	1442	Decreased	-1.76764	0.0771214	0.14728	0.00145491	0.00121185	0.00137024	0.000948902	0.00118981	0.001068	0.00199094	0.00189152	0	0	1666	145	244	79	136	31	1286	35	0	0.821109
PPI	Decreased	k__Bacteria|p__Proteobacteria|c__Deltaproteobacteria|o__Desulfovibrionales	-0.00352584843167097;-0.00418469783117935;-6.07349611731858E-4	345;1174;309	284;985;173	0.420882987054728;0.0916634033692147;0.871952428351315	0.869629952506614;0.415875605423067;0.950743273496322	-0.8048902988517741;-1.6866877782877103;-0.16117898994114982	miSeqRuns_UMCG-IBD-TIFN_Taxman_100Pc_GG13-PPI.txt;miSeqRuns_UMCG-IBD-TIFN_Taxman_100Pc_GG13-Reducing_stomach_acid2.txt;miSeqRuns_UMCG-IBD-TIFN_Taxman_100Pc_GG13-ZICPPI.txt	1828	1442	Decreased	-1.76764	0.0771214	0.14728	0.00145491	0.00121185	0.00137024	0.000948902	0.00118981	0.001068	0.00199094	0.00189152	0	0	1666	145	244	79	136	31	1286	35	0	0.821109
PPI	Increased	k__Bacteria|p__Firmicutes|c__Clostridia|o__Clostridiales|f__Ruminococcaceae|g__Clostridium|s__methylpentosum	2.34640757187112E-4;2.43898783023226E-4;7.769990578146E-4	345;1174;309	51;79;48	0.545565632655264;0.236128341966294;0.176883097008667	0.92759973542807;0.661638805915708;0.640802862510829	0.6044182088808269;1.1847195705875309;1.3504143917129685	miSeqRuns_UMCG-IBD-TIFN_Taxman_100Pc_GG13-PPI.txt;miSeqRuns_UMCG-IBD-TIFN_Taxman_100Pc_GG13-Reducing_stomach_acid2.txt;miSeqRuns_UMCG-IBD-TIFN_Taxman_100Pc_GG13-ZICPPI.txt	1828	178	Increased	1.76722	0.077192	0.14728	5.38833e-06	1.67667e-05	3.71349e-06	6.57993e-06	1.26584e-05	3.61336e-05	5.5557e-06	1.37566e-05	0	0	228	27	43	9	36	11	149	7	0	0.79079
PPI	Decreased	k__Bacteria|p__Bacteroidetes|c__Bacteroidia|o__Bacteroidales|f__Odoribacteraceae	-0.00437458142379318;-1.51514959537355E-4;-0.00626791653339692	345;1174;309	252;961;188	0.0525525833602462;0.920940504585539;0.0459945955074569	0.422225047426527;0.990483578093088;0.446686560272612	-1.9385793227204702;-0.0992490830256136;-1.9954429041065729	miSeqRuns_UMCG-IBD-TIFN_Taxman_100Pc_GG13-PPI.txt;miSeqRuns_UMCG-IBD-TIFN_Taxman_100Pc_GG13-Reducing_stomach_acid2.txt;miSeqRuns_UMCG-IBD-TIFN_Taxman_100Pc_GG13-ZICPPI.txt	1828	1401	Decreased	-1.74213	0.0814862	0.154457	0.000594209	0.000506065	0.000558461	0.000474152	0.000863916	0.000468811	0.000502267	0.000611841	5.27409e-07	0	1629	135	221	74	150	33	1258	28	57.5797	0.0946695
PPI	Decreased	k__Bacteria|p__Firmicutes|c__Clostridia|o__Clostridiales|f__Clostridiaceae|g__Clostridium|s__disporicum	-2.89078560226848E-5;-0.00168995887085957;-0.0014147277896584	345;1174;309	165;771;130	0.974414431797141;0.180714397153358;0.114677809402851	0.996343777686756;0.586024233066502;0.574393733704893	-0.032072251901518245;-1.3385586435190664;-1.5775117988090017	miSeqRuns_UMCG-IBD-TIFN_Taxman_100Pc_GG13-PPI.txt;miSeqRuns_UMCG-IBD-TIFN_Taxman_100Pc_GG13-Reducing_stomach_acid2.txt;miSeqRuns_UMCG-IBD-TIFN_Taxman_100Pc_GG13-ZICPPI.txt	1828	1066	Decreased	-1.73523	0.0827008	0.15562	0.000226873	0.000175694	0.000285357	0.000288944	0.000133602	7.17368e-05	8.71083e-05	7.81592e-05	0	0	1218	95	140	57	112	17	966	21	0	0.529855
PPI	Decreased	k__Bacteria|p__Proteobacteria|c__Gammaproteobacteria|o__Aeromonadales|f__Succinivibrionaceae|g__Succinatimonas|s__hippei	-2.04976500431934E-4;-4.30977850535781E-4	1174;309	18;3	0.190633946351472;0.213247888986153	0.603875648613749;0.688145216062231	-1.308706035910657;-1.2446841103870203	miSeqRuns_UMCG-IBD-TIFN_Taxman_100Pc_GG13-Reducing_stomach_acid2.txt;miSeqRuns_UMCG-IBD-TIFN_Taxman_100Pc_GG13-ZICPPI.txt	1483	21	Decreased	-1.73257	0.083173	0.15562	2.56671e-06	0	2.3191e-06	0	6.74909e-06	0	0	0	0	0	24	0	0	0	3	0	21	0	0	0.610005
PPI	Decreased	k__Bacteria|p__Firmicutes|c__Clostridia|o__Clostridiales|f__Lachnospiraceae|[g__Blautia/g__Anaerostipes]	-0.00323671074541579;-9.87417670936205E-4;-9.00911927422894E-4	345;1174;309	119;504;66	0.0638975503832882;0.386817335601324;0.606979091785369	0.457989995930791;0.817748307773352;0.860868224907239	-1.8528940201713726;-0.8654035456530044;-0.5143903684473403	miSeqRuns_UMCG-IBD-TIFN_Taxman_100Pc_GG13-PPI.txt;miSeqRuns_UMCG-IBD-TIFN_Taxman_100Pc_GG13-Reducing_stomach_acid2.txt;miSeqRuns_UMCG-IBD-TIFN_Taxman_100Pc_GG13-ZICPPI.txt	1828	689	Decreased	-1.70997	0.0872711	0.162241	0.000194441	0.000162471	0.000182949	0.000179171	0.00018151	6.338e-05	0.000247972	0.000246632	0	0	788	58	107	36	53	12	628	10	0	0.467028
PPI	Increased	k__Bacteria|p__Firmicutes|c__Bacilli|o__Gemellales|f__Gemellaceae|g__Gemella	8.47368528229261E-4;1.697966351266E-4;0.00118805224640943	345;1174;309	138;454;133	0.108243363078631;0.691536223679361;0.0929880370000562	0.579414346125209;0.976275315759913;0.542154774116346	1.6061390430328377;0.3967711547000018;1.6798421233437986	miSeqRuns_UMCG-IBD-TIFN_Taxman_100Pc_GG13-PPI.txt;miSeqRuns_UMCG-IBD-TIFN_Taxman_100Pc_GG13-Reducing_stomach_acid2.txt;miSeqRuns_UMCG-IBD-TIFN_Taxman_100Pc_GG13-ZICPPI.txt	1828	725	Increased	1.70638	0.0879373	0.162438	4.00483e-05	3.81495e-05	2.63362e-05	2.86673e-05	0.000127282	6.42382e-05	1.83086e-05	2.58637e-05	0.0332286	1	841	90	111	37	101	30	629	23	24.4498	0.266169
PPI	Decreased	k__Bacteria|p__Firmicutes|c__Clostridia|o__Clostridiales|[f__Ruminococcaceae/f__Lachnospiraceae]	-0.0023613970055159;-0.00155240266028508;-0.00782506871755796	345;1174;309	345;1174;303	0.440556684009278;0.485599039878254;0.0521831126735831	0.88027235046815;0.876355201343525;0.46358434846761	-0.7712535076711957;-0.6973256171779507;-1.9416200594134212	miSeqRuns_UMCG-IBD-TIFN_Taxman_100Pc_GG13-PPI.txt;miSeqRuns_UMCG-IBD-TIFN_Taxman_100Pc_GG13-Reducing_stomach_acid2.txt;miSeqRuns_UMCG-IBD-TIFN_Taxman_100Pc_GG13-ZICPPI.txt	1828	1822	Decreased	-1.69217	0.0906136	0.166322	0.00543599	0.00526312	0.00510419	0.00516687	0.00556995	0.00455322	0.00655847	0.00628513	1.5898e-05	0	2129	206	289	99	238	56	1602	51	0	0.370177
PPI	Increased	k__Bacteria|p__Firmicutes|c__Clostridia|o__Clostridiales|f__Lachnospiraceae|g__Clostridium|s__bolteae	-9.94715802556909E-5;4.4446130554278E-4;0.00156309292162357	345;1174;309	123;250;194	0.88523812503525;0.0785481519371335;0.446519637051735	0.991109715557945;0.382575704729097;0.815596342985414	-0.1443322348848316;1.7591728634834887;0.761230109560781	miSeqRuns_UMCG-IBD-TIFN_Taxman_100Pc_GG13-PPI.txt;miSeqRuns_UMCG-IBD-TIFN_Taxman_100Pc_GG13-Reducing_stomach_acid2.txt;miSeqRuns_UMCG-IBD-TIFN_Taxman_100Pc_GG13-ZICPPI.txt	1828	567	Increased	1.66006	0.0969022	0.176747	0.00010511	0.000233303	1.31006e-05	3.49716e-05	0.000600133	0.000721239	3.45572e-05	4.42567e-05	0	0	715	88	102	25	143	44	470	19	0	0.625255
PPI	Decreased	k__Bacteria|p__Proteobacteria|c__Alphaproteobacteria|o__RF32	-0.0013367178795761;-0.0015116829295184;-0.00150757548275297	345;1174;309	133;531;97	0.20542516718944;0.243230258154397;0.712149164773472	0.705204500290218;0.669447023349576;0.900390438796966	-1.2662455979865563;-1.166950752706184;-0.36897123599176157	miSeqRuns_UMCG-IBD-TIFN_Taxman_100Pc_GG13-PPI.txt;miSeqRuns_UMCG-IBD-TIFN_Taxman_100Pc_GG13-Reducing_stomach_acid2.txt;miSeqRuns_UMCG-IBD-TIFN_Taxman_100Pc_GG13-ZICPPI.txt	1828	761	Decreased	-1.63698	0.101634	0.184218	0.000448123	0.000491496	0.000384222	0.000422792	0.000878372	0.000950253	0.000327024	8.51464e-05	0	0	887	70	118	42	81	15	688	13	0	0.809945
PPI	Decreased	k__Bacteria|p__Firmicutes|c__Clostridia|o__Clostridiales|f__Lachnospiraceae|g__Ruminococcus|s__lactaris	-0.00125265838947626;-6.48284628576434E-4;-8.37061223588449E-4	345;1174;309	124;589;73	0.138722634829798;0.442026535284427;0.393612322199718	0.646796444337189;0.845586379396625;0.796747173918992	-1.480564598630371;-0.7687756015780505;-0.8530847238056719	miSeqRuns_UMCG-IBD-TIFN_Taxman_100Pc_GG13-PPI.txt;miSeqRuns_UMCG-IBD-TIFN_Taxman_100Pc_GG13-Reducing_stomach_acid2.txt;miSeqRuns_UMCG-IBD-TIFN_Taxman_100Pc_GG13-ZICPPI.txt	1828	786	Decreased	-1.61003	0.10739	0.192347	8.7697e-05	7.55107e-05	0.000103452	0.000135139	5.62664e-05	2.11821e-05	5.53039e-05	2.36786e-05	7.94607e-07	0	875	72	110	48	57	12	708	12	0	0.631716
PPI	Decreased	k__Bacteria|p__Proteobacteria|c__Deltaproteobacteria|o__Desulfovibrionales|f__Desulfovibrionaceae|g__Desulfovibrio	-0.00410270962991143;-0.00402022351389158;0.00189733378997881	345;1174;309	152;547;47	0.258591889434458;0.0737173325895842;0.444757528117449	0.764456982433683;0.367120454376505;0.814773704634341	-1.1297255459140834;-1.7883638007747087;0.7641841206151107	miSeqRuns_UMCG-IBD-TIFN_Taxman_100Pc_GG13-PPI.txt;miSeqRuns_UMCG-IBD-TIFN_Taxman_100Pc_GG13-Reducing_stomach_acid2.txt;miSeqRuns_UMCG-IBD-TIFN_Taxman_100Pc_GG13-ZICPPI.txt	1828	746	Decreased	-1.60978	0.107445	0.192347	0.000804407	0.000561042	0.000830935	0.000531576	0.000294005	0.000380746	0.00113136	0.000830354	0	0	839	69	133	40	33	12	673	17	18.933	0.291257
PPI	Decreased	k__Bacteria|p__Firmicutes|c__Clostridia|o__Clostridiales|[f__Christensenellaceae/f__Ruminococcaceae]	-5.0246995602304E-4;-4.59637371524391E-4;-9.47547001040111E-4	345;1174;309	97;370;23	0.425272428780496;0.421465191358534;0.137212115869852	0.869629952506614;0.831615818648852;0.597522184669366	-0.797307563422685;-0.8038818876691597;-1.486253368961922	miSeqRuns_UMCG-IBD-TIFN_Taxman_100Pc_GG13-PPI.txt;miSeqRuns_UMCG-IBD-TIFN_Taxman_100Pc_GG13-Reducing_stomach_acid2.txt;miSeqRuns_UMCG-IBD-TIFN_Taxman_100Pc_GG13-ZICPPI.txt	1828	490	Decreased	-1.60166	0.10923	0.193909	3.90082e-05	2.8645e-05	4.42447e-05	3.61678e-05	2.25708e-05	6.40692e-06	3.32376e-05	4.02043e-05	0	0	557	38	84	25	22	1	451	12	0	0.629533
PPI	Decreased	k__Bacteria|p__Firmicutes|c__Clostridia|o__Clostridiales|f__Clostridiaceae|g__Sarcina	-6.35730321698182E-5;-9.52352700912199E-4;-0.00146510047501554	345;1174;309	165;681;128	0.940000894014803;0.234635546273088;0.134956731957467	0.991539144897722;0.660685304953292;0.596792089827383	-0.0752687384399129;-1.188502370955355;-1.4948379785029138	miSeqRuns_UMCG-IBD-TIFN_Taxman_100Pc_GG13-PPI.txt;miSeqRuns_UMCG-IBD-TIFN_Taxman_100Pc_GG13-Reducing_stomach_acid2.txt;miSeqRuns_UMCG-IBD-TIFN_Taxman_100Pc_GG13-ZICPPI.txt	1828	974	Decreased	-1.59975	0.109655	0.193909	0.000221987	0.000273171	0.000290718	0.000137286	8.00724e-05	4.61372e-05	8.46679e-05	0.000804047	0	0	1124	91	138	49	108	19	878	23	0	0.578813
PPI	Decreased	k__Bacteria|p__Firmicutes|c__Clostridia|o__Clostridiales|f__Clostridiaceae	0.00292935719514324;-0.0136656080977846;-0.0171157843181972	345;1174;309	345;1174;309	0.751852881210212;0.164838891670282;0.131798982468821	0.978807199921599;0.555417044168213;0.593550187667558	0.3161971363307731;-1.3889798031486016;-1.5070455484759933	miSeqRuns_UMCG-IBD-TIFN_Taxman_100Pc_GG13-PPI.txt;miSeqRuns_UMCG-IBD-TIFN_Taxman_100Pc_GG13-Reducing_stomach_acid2.txt;miSeqRuns_UMCG-IBD-TIFN_Taxman_100Pc_GG13-ZICPPI.txt	1828	1828	Decreased	-1.59536	0.110631	0.19445	0.0337321	0.0264	0.0397717	0.0366119	0.025741	0.0161686	0.0179307	0.0186137	0.000448349	0	2135	210	289	99	241	60	1605	51	0	0.415769
PPI	Decreased	k__Bacteria|p__Bacteroidetes|c__Bacteroidia|o__Bacteroidales|f__Rikenellaceae|g__Alistipes|s__finegoldii	-4.79637882675888E-4;-6.27377053442849E-4;-3.37666797633837E-4	345;1174;309	95;377;70	0.390194967651388;0.185216234810969;0.711264092862848	0.852750251569989;0.594548638309933;0.900390438796966	-0.8592638428196386;-1.324864084947254;-0.37015890692705716	miSeqRuns_UMCG-IBD-TIFN_Taxman_100Pc_GG13-PPI.txt;miSeqRuns_UMCG-IBD-TIFN_Taxman_100Pc_GG13-Reducing_stomach_acid2.txt;miSeqRuns_UMCG-IBD-TIFN_Taxman_100Pc_GG13-ZICPPI.txt	1828	542	Decreased	-1.58722	0.112464	0.19648	4.13463e-05	2.9728e-05	4.351e-05	1.62147e-05	3.96706e-05	5.93414e-05	3.46955e-05	2.11206e-05	0	0	629	48	84	28	56	11	489	9	0	0.945842
PPI	Increased	k__Bacteria|p__Proteobacteria|c__Gammaproteobacteria|o__Enterobacteriales|f__Enterobacteriaceae|g__Morganella	2.94347249201178E-6;1.89285811329838E-4;-2.5727083921476E-4	345;1174;309	1;4;19	0.887756071020258;0.0457228201347489;0.848709740063555	0.991109715557945;0.279398487613078;0.945758107012719	0.14114414375207357;1.9979431841460338;-0.19076496292686826	miSeqRuns_UMCG-IBD-TIFN_Taxman_100Pc_GG13-PPI.txt;miSeqRuns_UMCG-IBD-TIFN_Taxman_100Pc_GG13-Reducing_stomach_acid2.txt;miSeqRuns_UMCG-IBD-TIFN_Taxman_100Pc_GG13-ZICPPI.txt	1828	24	Increased	1.58403	0.113188	0.196561	1.29268e-05	2.06104e-05	4.19245e-07	4.62516e-06	8.41943e-05	6.4505e-05	2.10035e-08	0	0	0	32	6	1	2	14	4	17	0	0	0.463255
PPI	Decreased	k__Bacteria|p__Firmicutes|c__Clostridia|o__Clostridiales|f__Ruminococcaceae|[g__Gemmiger/g__Subdoligranulum]	-5.34491542853967E-4;-1.71789313555803E-4;-3.99109958358042E-4	345;1174;309	108;340;33	0.179311975770451;0.569215812064064;0.195050451943766	0.693942688633195;0.931203212519185;0.66039924592128	-1.342876472911133;-0.5692067917756479;-1.29578243294555	miSeqRuns_UMCG-IBD-TIFN_Taxman_100Pc_GG13-PPI.txt;miSeqRuns_UMCG-IBD-TIFN_Taxman_100Pc_GG13-Reducing_stomach_acid2.txt;miSeqRuns_UMCG-IBD-TIFN_Taxman_100Pc_GG13-ZICPPI.txt	1828	481	Decreased	-1.5723	0.115882	0.200042	2.09092e-05	6.7328e-06	2.43589e-05	9.5532e-06	5.46481e-06	1.74167e-06	2.09564e-05	7.1298e-06	1.45472e-06	0	568	38	97	26	30	3	441	9	0	0.513182
PPI	Increased	k__Bacteria|p__Proteobacteria|c__Alphaproteobacteria|o__Rickettsiales|f__mitochondria|g__Malus|s__x_domestica	6.6514285402469E-5;3.76674770660391E-4;1.16827302881124E-4	345;1174;309	11;85;6	0.728187376068417;0.145086582375732;0.561655830444478	0.971982850304901;0.520959260300269;0.846843765020522	0.3475377330457602;1.4571079567324996;0.5803837953116915	miSeqRuns_UMCG-IBD-TIFN_Taxman_100Pc_GG13-PPI.txt;miSeqRuns_UMCG-IBD-TIFN_Taxman_100Pc_GG13-Reducing_stomach_acid2.txt;miSeqRuns_UMCG-IBD-TIFN_Taxman_100Pc_GG13-ZICPPI.txt	1828	102	Increased	1.55732	0.119395	0.204173	4.2908e-06	6.03112e-06	5.57297e-06	1.11589e-05	1.82465e-06	1.87e-06	1.57806e-06	9.72549e-07	0	0	100	14	9	9	3	3	88	2	0	0.925172
PPI	Increased	k__Bacteria|p__Firmicutes|c__Clostridia|o__Clostridiales|f__Lachnospiraceae|g__Moryella	3.35410634190259E-5;2.10976476227825E-4;1.19802693251352E-4	345;1174;309	19;51;14	0.891109172164343;0.117321160062245;0.556853174975478	0.991109715557945;0.477355874847859;0.843819161776547	0.1369008434163952;1.5661172942491453;0.5875220066683311	miSeqRuns_UMCG-IBD-TIFN_Taxman_100Pc_GG13-PPI.txt;miSeqRuns_UMCG-IBD-TIFN_Taxman_100Pc_GG13-Reducing_stomach_acid2.txt;miSeqRuns_UMCG-IBD-TIFN_Taxman_100Pc_GG13-ZICPPI.txt	1828	84	Increased	1.55611	0.119683	0.204173	2.80275e-06	2.75271e-06	1.47543e-06	3.38182e-06	9.00966e-06	2.44283e-06	2.56403e-06	1.89608e-06	0.00259635	1	92	16	15	7	9	5	68	4	0	0.820705
PPI	Decreased	k__Bacteria|p__Firmicutes|c__Clostridia|o__Clostridiales|f__Ruminococcaceae|g__Ruminococcus|s__callidus	-0.00246718084383641;-8.35428153090649E-4;6.57094603651271E-4	345;1174;309	137;537;65	0.0122744195382356;0.35894179871958;0.510939940239823	0.23510179069593;0.800462231323468;0.834604751363172	-2.5041551516672995;-0.9173833418649098;0.6573748167611014	miSeqRuns_UMCG-IBD-TIFN_Taxman_100Pc_GG13-PPI.txt;miSeqRuns_UMCG-IBD-TIFN_Taxman_100Pc_GG13-Reducing_stomach_acid2.txt;miSeqRuns_UMCG-IBD-TIFN_Taxman_100Pc_GG13-ZICPPI.txt	1828	739	Decreased	-1.5528	0.120472	0.204317	0.000104656	6.48224e-05	0.000123028	9.16756e-05	4.82756e-05	6.18617e-05	8.33314e-05	1.61787e-05	0	0	847	62	127	38	47	15	673	9	61.0391	0.0767903
PPI	Increased	k__Bacteria|p__Firmicutes|c__Clostridia|o__Clostridiales|f__Lachnospiraceae|g__Clostridium	1.48469999311035E-4;0.00100197552782662;0.00143710230406242	345;1174;309	320;1094;278	0.889819062384449;0.176652210666647;0.325004040250209	0.991109715557945;0.579190782699485;0.771225129773474	0.138533162514873;1.3511349404075546;0.984226741408415	miSeqRuns_UMCG-IBD-TIFN_Taxman_100Pc_GG13-PPI.txt;miSeqRuns_UMCG-IBD-TIFN_Taxman_100Pc_GG13-Reducing_stomach_acid2.txt;miSeqRuns_UMCG-IBD-TIFN_Taxman_100Pc_GG13-ZICPPI.txt	1828	1692	Increased	1.54763	0.121711	0.205219	0.000378636	0.00062804	0.000223918	0.000281764	0.00127565	0.00150568	0.00020612	0.000267709	3.81344e-06	0	1976	188	271	90	215	54	1490	44	0	0.811274
PPI	Increased	k__Bacteria|p__Proteobacteria|c__Gammaproteobacteria|o__Enterobacteriales|f__Enterobacteriaceae|g__Morganella|s__morganii	2.94347249201178E-6;1.7178031344441E-4;-2.44503279647047E-4	345;1174;309	1;4;19	0.887756071020258;0.0540649395214346;0.853243845541274	0.991109715557945;0.308024875825773;0.947681147887396	0.14114414375207357;1.9263159140485062;-0.18498111812296048	miSeqRuns_UMCG-IBD-TIFN_Taxman_100Pc_GG13-PPI.txt;miSeqRuns_UMCG-IBD-TIFN_Taxman_100Pc_GG13-Reducing_stomach_acid2.txt;miSeqRuns_UMCG-IBD-TIFN_Taxman_100Pc_GG13-ZICPPI.txt	1828	24	Increased	1.529	0.126264	0.210955	1.24795e-05	1.93994e-05	3.9678e-07	3.81783e-06	8.13156e-05	6.15985e-05	2.10035e-08	0	0	0	32	6	1	2	14	4	17	0	0	0.48993
PPI	Decreased	k__Bacteria|p__Bacteroidetes|c__Bacteroidia|o__Bacteroidales|f__Rikenellaceae	-0.0155318681071771;0.00115118097643899;-0.0211319170139176	345;1174;309	335;1159;272	0.062226467334017;0.823761321620774;0.0295551783962234	0.454144042297387;0.990483578093088;0.38527629948432	-1.8646786057873022;0.22270986680321037;-2.176001098799401	miSeqRuns_UMCG-IBD-TIFN_Taxman_100Pc_GG13-PPI.txt;miSeqRuns_UMCG-IBD-TIFN_Taxman_100Pc_GG13-Reducing_stomach_acid2.txt;miSeqRuns_UMCG-IBD-TIFN_Taxman_100Pc_GG13-ZICPPI.txt	1828	1766	Decreased	-1.52624	0.12695	0.210955	0.00980481	0.00720407	0.00918109	0.00772349	0.0118241	0.00710858	0.010441	0.00630813	0.000352763	0	2049	199	283	98	211	54	1555	47	66.2857	0.0515039
PPI	Decreased	k__Bacteria|p__Proteobacteria|c__Gammaproteobacteria|o__Enterobacteriales|f__Enterobacteriaceae|g__Serratia|s__marcescens	-5.94028543048174E-5;-9.83280019047009E-5;-9.55098003094888E-4	345;1174;309	14;11;13	0.643786802523235;0.151429929049771;0.675516952621765	0.947244002373031;0.533541662123629;0.891756535380185	-0.46241073495471524;-1.43449894812128;-0.4185884219677835	miSeqRuns_UMCG-IBD-TIFN_Taxman_100Pc_GG13-PPI.txt;miSeqRuns_UMCG-IBD-TIFN_Taxman_100Pc_GG13-Reducing_stomach_acid2.txt;miSeqRuns_UMCG-IBD-TIFN_Taxman_100Pc_GG13-ZICPPI.txt	1828	38	Decreased	-1.52258	0.127863	0.210955	4.25832e-05	2.16496e-06	4.43744e-07	0	0.000280704	7.39903e-06	7.59048e-07	2.09804e-07	0	0	55	5	13	0	9	4	33	1	0	0.937739
PPI	Decreased	k__Bacteria|p__Firmicutes|c__Clostridia|o__Clostridiales|[f__Ruminococcaceae/f__Clostridiaceae]	-0.00376640042041904;-9.87885055985351E-4;8.59994669443486E-5	345;1174;309	292;1008;169	0.0693022916785887;0.334593345801902;0.921638153100034	0.470913876081054;0.779467721799763;0.96664934444688	-1.8164439947019253;-0.9649031055657346;0.09837043140454171	miSeqRuns_UMCG-IBD-TIFN_Taxman_100Pc_GG13-PPI.txt;miSeqRuns_UMCG-IBD-TIFN_Taxman_100Pc_GG13-Reducing_stomach_acid2.txt;miSeqRuns_UMCG-IBD-TIFN_Taxman_100Pc_GG13-ZICPPI.txt	1828	1469	Decreased	-1.52194	0.128023	0.210955	0.000341552	0.000215616	0.00031546	0.000228501	0.000229821	0.000180068	0.000531778	0.000232423	0	0	1699	147	251	79	134	30	1314	38	0	0.382153
PPI	Decreased	k__Bacteria|p__Actinobacteria|c__Actinobacteria|o__Bifidobacteriales|f__Bifidobacteriaceae|g__Bifidobacterium|[s__longum/s__breve]	-0.00173049165977224;-0.00201738709790754;-0.00465154149821741	345;1174;309	310;1102;267	0.627146874639462;0.341952954801617;0.188738665002381	0.939967133166591;0.78667059445736;0.654533914505657	-0.48574655040475206;-0.95031355218494;-1.3143196271115327	miSeqRuns_UMCG-IBD-TIFN_Taxman_100Pc_GG13-PPI.txt;miSeqRuns_UMCG-IBD-TIFN_Taxman_100Pc_GG13-Reducing_stomach_acid2.txt;miSeqRuns_UMCG-IBD-TIFN_Taxman_100Pc_GG13-ZICPPI.txt	1828	1679	Decreased	-1.51297	0.130287	0.213473	0.00165683	0.00134489	0.00158465	0.00134004	0.00164843	0.00119829	0.00193234	0.00152678	2.79838e-05	0	1962	182	261	88	213	49	1488	45	0	0.749236
PPI	Decreased	k__Bacteria|p__Firmicutes|c__Bacilli|o__Bacillales|f__Bacillaceae|g__Geobacillus|s__vulcani	-7.93910682920227E-5;-2.22531477308242E-4	345;1174	3;47	0.646324473892787;0.147109721429887	0.947605033964317;0.524276252556441	-0.4588742460783681;-1.4498164125792994	miSeqRuns_UMCG-IBD-TIFN_Taxman_100Pc_GG13-PPI.txt;miSeqRuns_UMCG-IBD-TIFN_Taxman_100Pc_GG13-Reducing_stomach_acid2.txt	1519	50	Decreased	-1.49327	0.135366	0.219529	1.75442e-06	1.54286e-07	2.24397e-06	3.27273e-07	0	0	1.3965e-06	0	7.94607e-07	0	52	1	3	1	0	0	49	0	0	0.773704
PPI	Increased	k__Bacteria|p__Proteobacteria|c__Betaproteobacteria|o__Burkholderiales|f__Burkholderiaceae|g__Lautropia	7.30350157139921E-5;5.73371722386261E-5;1.04655167363697E-4	345;1174;309	7;11;1	0.424188039930907;0.859426050252897;0.0146411517539461	0.869629952506614;0.990483578093088;0.300471384634207	0.7991765627286058;0.17710482727061688;2.441135706331586	miSeqRuns_UMCG-IBD-TIFN_Taxman_100Pc_GG13-PPI.txt;miSeqRuns_UMCG-IBD-TIFN_Taxman_100Pc_GG13-Reducing_stomach_acid2.txt;miSeqRuns_UMCG-IBD-TIFN_Taxman_100Pc_GG13-ZICPPI.txt	1828	19	Increased	1.49277	0.135497	0.219529	6.54279e-06	6.26524e-07	9.68954e-06	8.2899e-07	0	4.13333e-07	2.93806e-07	4.84314e-07	0	0	17	6	5	4	0	1	12	1	54.554	0.110757
PPI	Increased	k__Bacteria|p__Proteobacteria|c__Gammaproteobacteria|o__Enterobacteriales|f__Enterobacteriaceae|g__Yersinia	-1.66982714588441E-4;6.10280635718345E-4;-2.06044491428531E-4	345;1174;309	6;14;1	0.463471550552676;0.00858066289937233;0.465305965422942	0.889539186148404;0.0928730572637946;0.820464276267387	-0.7331424516427505;2.6283244597316986;-0.7301377877311084	miSeqRuns_UMCG-IBD-TIFN_Taxman_100Pc_GG13-PPI.txt;miSeqRuns_UMCG-IBD-TIFN_Taxman_100Pc_GG13-Reducing_stomach_acid2.txt;miSeqRuns_UMCG-IBD-TIFN_Taxman_100Pc_GG13-ZICPPI.txt	1828	21	Increased	1.48763	0.136848	0.220485	3.19189e-06	1.00553e-05	3.1135e-06	2.13295e-05	4.40423e-06	0	2.47248e-06	0	0	0	23	5	6	5	1	0	16	0	65.3117	0.0559768
PPI	Decreased	k__Bacteria|p__Bacteroidetes|c__Bacteroidia|o__Bacteroidales|f__Paraprevotellaceae|g__Paraprevotella	-0.00335303862595063;-0.0039283228164833;-0.00166787132385844	345;1174;309	140;614;84	0.43359410497839;0.22600448857043;0.707479395782073	0.875362617931817;0.654209854273854;0.900315112806234	-0.7830562091534063;-1.2107154250696268;-0.3752434807855858	miSeqRuns_UMCG-IBD-TIFN_Taxman_100Pc_GG13-PPI.txt;miSeqRuns_UMCG-IBD-TIFN_Taxman_100Pc_GG13-Reducing_stomach_acid2.txt;miSeqRuns_UMCG-IBD-TIFN_Taxman_100Pc_GG13-ZICPPI.txt	1828	838	Decreased	-1.46472	0.142997	0.228116	0.00162578	0.00116897	0.00152699	0.0010958	0.00211609	0.00134733	0.00158438	0.00110116	0	0	934	82	116	42	65	19	753	21	0	0.963481
PPI	Decreased	k__Bacteria|p__Firmicutes|c__Clostridia|o__Clostridiales|f__Tissierellaceae|g__Gallicola	-5.34085822579905E-5;-8.17479942346942E-5;-4.13113060859014E-4	345;1174;309	7;20;7	0.658503487970996;0.471627359384456;0.0908297935791647	0.952437807781126;0.863636093410239;0.542154774116346	-0.4419802634534887;-0.7198337546188922;-1.6910366996878863	miSeqRuns_UMCG-IBD-TIFN_Taxman_100Pc_GG13-PPI.txt;miSeqRuns_UMCG-IBD-TIFN_Taxman_100Pc_GG13-Reducing_stomach_acid2.txt;miSeqRuns_UMCG-IBD-TIFN_Taxman_100Pc_GG13-ZICPPI.txt	1828	34	Decreased	-1.46414	0.143157	0.228116	1.39839e-06	4.31905e-07	1.16556e-06	6.35354e-07	3.39245e-06	0	6.01574e-07	5.45098e-07	0	0	45	2	6	1	7	0	32	1	0	0.489334
PPI	Increased	k__Bacteria|p__Proteobacteria|c__Betaproteobacteria|o__Burkholderiales|f__Burkholderiaceae	7.30350157139921E-5;4.46385430507733E-5;1.04655167363697E-4	345;1174;309	7;20;1	0.424188039930907;0.89383674725385;0.0146411517539461	0.869629952506614;0.990483578093088;0.300471384634207	0.7991765627286058;0.1334509578186734;2.441135706331586	miSeqRuns_UMCG-IBD-TIFN_Taxman_100Pc_GG13-PPI.txt;miSeqRuns_UMCG-IBD-TIFN_Taxman_100Pc_GG13-Reducing_stomach_acid2.txt;miSeqRuns_UMCG-IBD-TIFN_Taxman_100Pc_GG13-ZICPPI.txt	1828	28	Increased	1.45779	0.144899	0.229631	6.98229e-06	7.1081e-07	1.03457e-05	1.00778e-06	0	4.13333e-07	2.93806e-07	4.84314e-07	0	0	26	6	5	4	0	1	21	1	55.4615	0.105901
PPI	Increased	k__Bacteria|p__Firmicutes|c__Bacilli|o__Lactobacillales|f__Leuconostocaceae|g__Weissella	4.38844051307113E-4;7.39606296228996E-4;4.42224338894481E-4	345;1174;309	31;119;28	0.155474880840447;0.362197119565765;0.800273075021686	0.661489904974496;0.802860449693914;0.930262286965251	1.4204563048809165;0.9111864930240225;0.25299370844136954	miSeqRuns_UMCG-IBD-TIFN_Taxman_100Pc_GG13-PPI.txt;miSeqRuns_UMCG-IBD-TIFN_Taxman_100Pc_GG13-Reducing_stomach_acid2.txt;miSeqRuns_UMCG-IBD-TIFN_Taxman_100Pc_GG13-ZICPPI.txt	1828	178	Increased	1.45133	0.146689	0.231203	6.29683e-05	4.37578e-05	5.75863e-05	6.00223e-05	0.000158099	4.80576e-05	3.65681e-06	7.12692e-06	4.86425e-05	0	198	27	25	15	22	6	151	6	0	0.668441
PPI	Decreased	k__Bacteria|p__Firmicutes|c__Clostridia|o__Clostridiales|f__Ruminococcaceae|g__Ruminococcus	-0.00430370369204352;-0.0111713158821217;-0.0216839237944637	345;1174;309	345;1174;303	0.820346982531013;0.280427970055754;0.247772417965558	0.991109715557945;0.703979894895545;0.723011255974754	-0.22709871589795594;-1.0793584405787222;-1.155776914809581	miSeqRuns_UMCG-IBD-TIFN_Taxman_100Pc_GG13-PPI.txt;miSeqRuns_UMCG-IBD-TIFN_Taxman_100Pc_GG13-Reducing_stomach_acid2.txt;miSeqRuns_UMCG-IBD-TIFN_Taxman_100Pc_GG13-ZICPPI.txt	1828	1822	Decreased	-1.43884	0.150197	0.235452	0.0571212	0.0504444	0.0576415	0.0533213	0.0430208	0.0327593	0.0669445	0.0656658	0	0	2125	209	289	99	236	59	1600	51	0	0.785781
PPI	Decreased	k__Bacteria|p__Firmicutes|c__Clostridia|o__Clostridiales|f__Christensenellaceae	-0.00488901445798349;-0.00123273908529276;-0.00545054858962656	345;1174;309	317;1114;208	0.300855694465695;0.759849855546934;0.0858546529687305	0.797062305050999;0.987359345673806;0.542154774116346	-1.034600127442133;-0.30567796052094903;-1.717681897777598	miSeqRuns_UMCG-IBD-TIFN_Taxman_100Pc_GG13-PPI.txt;miSeqRuns_UMCG-IBD-TIFN_Taxman_100Pc_GG13-Reducing_stomach_acid2.txt;miSeqRuns_UMCG-IBD-TIFN_Taxman_100Pc_GG13-ZICPPI.txt	1828	1639	Decreased	-1.40064	0.161321	0.251532	0.00358041	0.00223075	0.00421637	0.00348711	0.00140483	0.00053572	0.00302909	0.00178607	1.57973e-05	0	1888	177	268	94	166	38	1454	45	7.08353	0.340876
PPI	Increased	k__Bacteria|p__Proteobacteria|c__Gammaproteobacteria|o__Enterobacteriales|f__Enterobacteriaceae|g__Citrobacter|s__koseri	7.43652003064096E-5;2.92464975944469E-4;0.00102112055054553	345;1174;309	5;26;3	0.84898280458714;0.701258965725819;0.0150715773855537	0.991109715557945;0.977959984422506;0.300471384634207	0.19041645468340423;0.3836215494496596;2.4306545336543444	miSeqRuns_UMCG-IBD-TIFN_Taxman_100Pc_GG13-PPI.txt;miSeqRuns_UMCG-IBD-TIFN_Taxman_100Pc_GG13-Reducing_stomach_acid2.txt;miSeqRuns_UMCG-IBD-TIFN_Taxman_100Pc_GG13-ZICPPI.txt	1828	34	Increased	1.3895	0.164682	0.255398	3.36006e-05	4.41e-05	4.83513e-05	6.82058e-05	5.51867e-08	3.92063e-05	6.70577e-06	3.06361e-06	0	0	34	5	4	2	1	2	29	1	51.9323	0.12488
PPI	Increased	k__Bacteria|p__Proteobacteria|c__Gammaproteobacteria|o__Pasteurellales|f__Pasteurellaceae|g__Actinobacillus	2.30510433049907E-5;6.474593039258E-5;9.27685577738212E-4	345;1174;309	23;58;20	0.937933978301561;0.693626869425089;0.0156038713482628	0.991212541744507;0.976275315759913;0.304997778878424	0.07786683854187156;0.39393792519613025;2.4180514265648503	miSeqRuns_UMCG-IBD-TIFN_Taxman_100Pc_GG13-PPI.txt;miSeqRuns_UMCG-IBD-TIFN_Taxman_100Pc_GG13-Reducing_stomach_acid2.txt;miSeqRuns_UMCG-IBD-TIFN_Taxman_100Pc_GG13-ZICPPI.txt	1828	101	Increased	1.34369	0.179049	0.275002	3.09818e-06	5.56249e-06	2.49155e-06	1.51586e-06	4.86173e-06	1.53599e-05	3.88403e-06	1.89137e-06	0	0	115	17	19	7	13	7	83	3	52.4118	0.12229
PPI	Decreased	k__Bacteria|p__Firmicutes|c__Clostridia|o__Clostridiales|f__Lachnospiraceae|g__Dorea|s__formicigenerans	-6.60075223546772E-4;-0.0025293331817806;-0.00408447507272716	345;1174;309	331;1151;248	0.866390707063285;0.252456998220185;0.39062561289156	0.991109715557945;0.67978664886606;0.794125341191961	-0.16824478838810092;-1.1444019057994377;-0.8584833637406082	miSeqRuns_UMCG-IBD-TIFN_Taxman_100Pc_GG13-PPI.txt;miSeqRuns_UMCG-IBD-TIFN_Taxman_100Pc_GG13-Reducing_stomach_acid2.txt;miSeqRuns_UMCG-IBD-TIFN_Taxman_100Pc_GG13-ZICPPI.txt	1828	1730	Decreased	-1.34317	0.179218	0.275002	0.00314162	0.00301782	0.00301871	0.00307829	0.00285779	0.00248164	0.00383549	0.00353123	7.53328e-06	0	2004	187	277	93	196	45	1531	49	0	0.873339
PPI	Decreased	k__Bacteria|p__Firmicutes|c__Clostridia|o__Clostridiales|f__Lachnospiraceae|g__Anaerostipes	1.67620103828834E-4;-0.003084405255507;-0.00143493037782032	345;1174;309	324;1127;223	0.961106357666131;0.132181185682421;0.714794279973199	0.994596915079819;0.504477546146191;0.900390438796966	0.04876527262049984;-1.5055560202800484;-0.3654248692404359	miSeqRuns_UMCG-IBD-TIFN_Taxman_100Pc_GG13-PPI.txt;miSeqRuns_UMCG-IBD-TIFN_Taxman_100Pc_GG13-Reducing_stomach_acid2.txt;miSeqRuns_UMCG-IBD-TIFN_Taxman_100Pc_GG13-ZICPPI.txt	1828	1674	Decreased	-1.3356	0.18168	0.277312	0.00169346	0.00146184	0.00170774	0.00137256	0.00147691	0.00133214	0.00182092	0.00178775	5.44768e-06	0	1947	173	274	92	182	36	1491	45	0	0.733892
PPI	Decreased	k__Bacteria|p__Bacteroidetes|c__Bacteroidia|o__Bacteroidales|f__Rikenellaceae|g__Alistipes|s__indistinctus	-0.00180554158469982;-2.56110111597242E-4;-8.35797557793088E-4	345;1174;309	139;539;70	0.0634285775504674;0.748468087295844;0.513110710817217	0.457989995930791;0.985809582315553;0.835422727701587	-1.8561752857986251;-0.3206599681085121;-0.6540016993044708	miSeqRuns_UMCG-IBD-TIFN_Taxman_100Pc_GG13-PPI.txt;miSeqRuns_UMCG-IBD-TIFN_Taxman_100Pc_GG13-Reducing_stomach_acid2.txt;miSeqRuns_UMCG-IBD-TIFN_Taxman_100Pc_GG13-ZICPPI.txt	1828	748	Decreased	-1.33224	0.18278	0.277509	0.000119937	5.32341e-05	0.000123866	7.05348e-05	9.55834e-05	4.61226e-05	0.000125631	2.80168e-05	0	0	852	70	124	43	54	14	674	13	9.1345	0.332695
PPI	Increased	k__Bacteria|p__Actinobacteria|c__Actinobacteria|o__Actinomycetales|f__Corynebacteriaceae|g__Corynebacterium|s__durum	3.71377525524716E-4;1.72188345413237E-4;0.00133360501909152	345;1174;309	160;646;133	0.552216509689217;0.735293855294252;0.0516228962064316	0.928384473225302;0.981222930219696;0.463217109009281	0.5944420216952384;0.33809200495461206;1.946265161124144	miSeqRuns_UMCG-IBD-TIFN_Taxman_100Pc_GG13-PPI.txt;miSeqRuns_UMCG-IBD-TIFN_Taxman_100Pc_GG13-Reducing_stomach_acid2.txt;miSeqRuns_UMCG-IBD-TIFN_Taxman_100Pc_GG13-ZICPPI.txt	1828	939	Increased	1.32938	0.183723	0.277509	3.78381e-05	5.35368e-05	4.10058e-05	5.4325e-05	3.85243e-05	7.46073e-05	2.54828e-05	2.72179e-05	0.00183711	1	1083	94	136	47	106	25	841	22	19.626	0.288176
PPI	Increased	k__Bacteria|p__Proteobacteria	-0.00381040380610292;0.00603005308173321;0.0104410505773427	345;1174;309	341;1165;307	0.565403732234054;0.142385160425495;0.340254505756668	0.932227293780136;0.520390340359889;0.775637250404097	-0.574833759843096;1.4669665301985906;0.9536625043406137	miSeqRuns_UMCG-IBD-TIFN_Taxman_100Pc_GG13-PPI.txt;miSeqRuns_UMCG-IBD-TIFN_Taxman_100Pc_GG13-Reducing_stomach_acid2.txt;miSeqRuns_UMCG-IBD-TIFN_Taxman_100Pc_GG13-ZICPPI.txt	1828	1813	Increased	1.31798	0.18751	0.281371	0.00955687	0.0157517	0.00690345	0.0117215	0.0237104	0.0305181	0.0076241	0.00620273	0	0	2121	207	286	98	241	59	1594	50	0	0.43718
PPI	Decreased	k__Bacteria|p__Firmicutes|c__Clostridia|o__Clostridiales|f__Lachnospiraceae|g__Roseburia|s__faecis	0.00159007114861619;-0.00604439564418936;0.0025129785960852	345;1174;309	325;1111;260	0.698261073772097;0.0354838000095018;0.625116891257176	0.961489319677356;0.238202201676222;0.868953733522479	0.3876688997204703;-2.1027937797401064;0.48861132846105715	miSeqRuns_UMCG-IBD-TIFN_Taxman_100Pc_GG13-PPI.txt;miSeqRuns_UMCG-IBD-TIFN_Taxman_100Pc_GG13-Reducing_stomach_acid2.txt;miSeqRuns_UMCG-IBD-TIFN_Taxman_100Pc_GG13-ZICPPI.txt	1828	1696	Decreased	-1.31586	0.18822	0.281371	0.0022001	0.00203833	0.00219915	0.00166267	0.0026071	0.0027108	0.00186425	0.00197641	1.34554e-05	0	1979	185	273	90	206	48	1500	47	35.0497	0.214459
PPI	Decreased	k__Bacteria|p__Bacteroidetes|c__Bacteroidia|o__Bacteroidales|f__Bacteroidaceae|g__Bacteroides|s__eggerthii	-4.51129117059975E-4;-0.00209574809247135;3.99675393785013E-5	345;1174;309	118;389;112	0.199337639017543;0.348000951996398;0.916113153788429	0.705120404944318;0.791902142732832;0.964557969339988	-1.2834409384803804;-0.9384738451172402;0.10533101456412987	miSeqRuns_UMCG-IBD-TIFN_Taxman_100Pc_GG13-PPI.txt;miSeqRuns_UMCG-IBD-TIFN_Taxman_100Pc_GG13-Reducing_stomach_acid2.txt;miSeqRuns_UMCG-IBD-TIFN_Taxman_100Pc_GG13-ZICPPI.txt	1828	619	Decreased	-1.26635	0.205388	0.304101	0.000680189	0.00100154	0.000522519	0.000342973	0.00112881	0.00118587	0.000892573	0.00206308	2.97266e-05	0	737	64	104	30	85	22	548	12	0	0.626438
PPI	Increased	k__Bacteria|p__Proteobacteria|c__Gammaproteobacteria|o__Enterobacteriales|f__Enterobacteriaceae|[g__Escherichia/g__Citrobacter]	-1.08906384551069E-4;2.47734198924149E-4;5.06020260764058E-4	345;1174;309	3;16;1	0.623504436284104;0.465862586656853;0.0295206662064274	0.939749539503404;0.860373728814589;0.38527629948432	-0.49088973691982324;0.7292273780453218;2.1764628825675176	miSeqRuns_UMCG-IBD-TIFN_Taxman_100Pc_GG13-PPI.txt;miSeqRuns_UMCG-IBD-TIFN_Taxman_100Pc_GG13-Reducing_stomach_acid2.txt;miSeqRuns_UMCG-IBD-TIFN_Taxman_100Pc_GG13-ZICPPI.txt	1828	20	Increased	1.26597	0.205522	0.304101	6.72932e-06	1.0819e-05	9.42437e-06	1.56536e-05	0	1.20379e-05	2.31611e-06	0	0	0	19	4	3	3	0	1	16	0	48.8104	0.141774
PPI	Decreased	k__Bacteria|p__Firmicutes|c__Clostridia|o__Clostridiales|f__Ruminococcaceae|g__Faecalibacterium|s__prausnitzii	-0.00114123706755759;-0.0102031772230725;-0.0148916830942835	345;1174;309	341;1171;284	0.940209781842996;0.25119846463254;0.469972990167351	0.991539144897722;0.678505949916445;0.822407895522237	-0.07500619630694996;-1.147443274812566;-0.7225229994478805	miSeqRuns_UMCG-IBD-TIFN_Taxman_100Pc_GG13-PPI.txt;miSeqRuns_UMCG-IBD-TIFN_Taxman_100Pc_GG13-Reducing_stomach_acid2.txt;miSeqRuns_UMCG-IBD-TIFN_Taxman_100Pc_GG13-ZICPPI.txt	1828	1796	Decreased	-1.2492	0.211593	0.310009	0.0653257	0.0559476	0.068487	0.0611598	0.0589974	0.0496381	0.0588437	0.0532529	0	0	2089	202	285	98	223	53	1581	51	0	0.86771
PPI	Decreased	k__Bacteria|p__Firmicutes|c__Clostridia|o__Clostridiales|f__Ruminococcaceae|g__Faecalibacterium	-0.00113328562898192;-0.0102101711240281;-0.014914975446046	345;1174;309	341;1171;284	0.940657685379684;0.251337527229508;0.46945254907371	0.991539144897722;0.678505949916445;0.822407895522237	-0.07444326300747282;-1.1471066949458546;-0.72337007841767	miSeqRuns_UMCG-IBD-TIFN_Taxman_100Pc_GG13-PPI.txt;miSeqRuns_UMCG-IBD-TIFN_Taxman_100Pc_GG13-Reducing_stomach_acid2.txt;miSeqRuns_UMCG-IBD-TIFN_Taxman_100Pc_GG13-ZICPPI.txt	1828	1796	Decreased	-1.24903	0.211653	0.310009	0.0654369	0.0560202	0.0686223	0.0612634	0.059061	0.0496785	0.058905	0.0533032	0	0	2089	202	285	98	223	53	1581	51	0	0.86737
PPI	Increased	k__Bacteria|p__Bacteroidetes|c__Bacteroidia|o__Bacteroidales|f__Bacteroidaceae|g__Bacteroides|s__barnesiae	-3.26205464636773E-4;0.00274301426657359;-4.30097364562866E-4	345;1174;309	2;29;1	0.328067554347893;0.0188032355303778;0.546937994616762	0.818523457013772;0.157528624139826;0.843389593796883	-0.9780136877623195;2.349409082810374;-0.60235479380223	miSeqRuns_UMCG-IBD-TIFN_Taxman_100Pc_GG13-PPI.txt;miSeqRuns_UMCG-IBD-TIFN_Taxman_100Pc_GG13-Reducing_stomach_acid2.txt;miSeqRuns_UMCG-IBD-TIFN_Taxman_100Pc_GG13-ZICPPI.txt	1828	32	Increased	1.21027	0.226176	0.326657	6.7881e-05	0.000191387	9.36132e-05	0.000405973	2.82561e-05	0	5.20758e-06	0	0	0	29	6	2	6	1	0	26	0	62.786	0.0680742
PPI	Increased	k__Bacteria|p__Firmicutes|c__Bacilli|o__Bacillales|f__Bacillaceae	-1.78902949520797E-4;3.6748725734491E-4;2.53325618725754E-4	345;1174;309	58;271;60	0.672480121530654;0.207040152202748;0.357449742261433	0.955415448483902;0.626877258612293;0.786315405900034	-0.4227466419729308;1.2617461294035706;0.9202354319589608	miSeqRuns_UMCG-IBD-TIFN_Taxman_100Pc_GG13-PPI.txt;miSeqRuns_UMCG-IBD-TIFN_Taxman_100Pc_GG13-Reducing_stomach_acid2.txt;miSeqRuns_UMCG-IBD-TIFN_Taxman_100Pc_GG13-ZICPPI.txt	1828	389	Increased	1.20585	0.227876	0.326657	1.03776e-05	1.92848e-05	1.10405e-05	2.11991e-05	9.59138e-06	2.83601e-05	8.5674e-06	4.89216e-06	8.76062e-05	1	434	48	50	25	44	16	340	7	0	0.558924
PPI	Decreased	k__Bacteria|p__Actinobacteria|c__Actinobacteria|o__Actinomycetales|f__Actinomycetaceae|g__Arcanobacterium	-2.52352404663783E-6;-4.73172238655043E-5;-1.2168726858313E-4	345;1174;309	4;10;5	0.970523561572493;0.373982371632693;0.246259767493208	0.994596915079819;0.810385526211793;0.723011255974754	-0.03695164438737301;-0.8890385323196488;-1.1594820047468049	miSeqRuns_UMCG-IBD-TIFN_Taxman_100Pc_GG13-PPI.txt;miSeqRuns_UMCG-IBD-TIFN_Taxman_100Pc_GG13-Reducing_stomach_acid2.txt;miSeqRuns_UMCG-IBD-TIFN_Taxman_100Pc_GG13-ZICPPI.txt	1828	19	Decreased	-1.20523	0.228113	0.326657	3.12012e-07	0	2.68465e-07	0	6.14523e-07	0	2.2173e-07	0	9.93991e-06	1	28	0	4	0	5	0	19	0	0	0.710503
PPI	Decreased	k__Bacteria|p__Firmicutes|c__Clostridia|o__Clostridiales|f__Clostridiaceae|g__Clostridium|s__paraputrificum	-4.65894317339106E-4;-5.55193873736544E-4;-0.00244487648657592	345;1174;309	35;154;75	0.640000265573879;0.48965987187672;0.276615414830559	0.946840854127298;0.880749545070074;0.747878035113172	-0.46769842779777937;-0.6908499020527319;-1.087954001049307	miSeqRuns_UMCG-IBD-TIFN_Taxman_100Pc_GG13-PPI.txt;miSeqRuns_UMCG-IBD-TIFN_Taxman_100Pc_GG13-Reducing_stomach_acid2.txt;miSeqRuns_UMCG-IBD-TIFN_Taxman_100Pc_GG13-ZICPPI.txt	1828	264	Decreased	-1.20413	0.22854	0.326657	9.10048e-05	7.02215e-05	5.87905e-05	8.62809e-05	0.000290668	7.68554e-05	4.4332e-05	3.12425e-05	0	0	314	32	30	12	56	16	228	4	0	0.806649
PPI	Decreased	k__Bacteria|p__Firmicutes|c__Clostridia|o__Clostridiales|f__Lachnospiraceae|g__Roseburia|s__inulinivorans	-3.77844009482079E-4;-0.00102281764553011;-5.52351332347111E-4	345;1174;309	253;886;176	0.764556712569653;0.26455215750059;0.662206179783161	0.980389249678797;0.69207487043383;0.883666329889024	-0.2995024373871734;-1.1156962939051516;-0.4368692415802624	miSeqRuns_UMCG-IBD-TIFN_Taxman_100Pc_GG13-PPI.txt;miSeqRuns_UMCG-IBD-TIFN_Taxman_100Pc_GG13-Reducing_stomach_acid2.txt;miSeqRuns_UMCG-IBD-TIFN_Taxman_100Pc_GG13-ZICPPI.txt	1828	1315	Decreased	-1.20384	0.228651	0.326657	0.000191872	0.000136157	0.00020859	0.000134062	0.000150741	0.000149687	0.000163984	0.000124306	3.34408e-07	0	1534	130	215	68	143	28	1176	34	0	0.962663
PPI	Increased	k__Bacteria|p__Actinobacteria|c__Coriobacteriia|o__Coriobacteriales|f__Coriobacteriaceae|g__Olsenella|s__profusa	3.6701329579869E-4;5.65634179661274E-5;-2.04420103469646E-6	345;1174;309	12;38;7	0.076088595549448;0.592519364474496;0.989637322499221	0.493718720514962;0.942942822824936;0.995357769450084	1.7738461894632338;0.5351887215167485;-0.012988055361199808	miSeqRuns_UMCG-IBD-TIFN_Taxman_100Pc_GG13-PPI.txt;miSeqRuns_UMCG-IBD-TIFN_Taxman_100Pc_GG13-Reducing_stomach_acid2.txt;miSeqRuns_UMCG-IBD-TIFN_Taxman_100Pc_GG13-ZICPPI.txt	1828	57	Increased	1.19417	0.232411	0.3304	9.80503e-07	3.17968e-06	9.83321e-07	1.03323e-06	1.44974e-06	2.27052e-06	5.7872e-07	8.4159e-06	1.2963e-05	1	65	9	9	5	7	1	49	3	0.352725	0.36658
PPI	Increased	k__Bacteria|p__Actinobacteria|c__Actinobacteria|o__Actinomycetales|f__Actinomycetaceae|g__Varibaculum	8.64249429114441E-4;2.6017733413028E-4;-2.07523066921561E-4	345;1174;309	64;282;41	0.284413447202763;0.30918024891577;0.826973165573598	0.788189449538966;0.744550400685189;0.937046607051444	1.0704574601493024;1.016943624393038;-0.2185852219958738	miSeqRuns_UMCG-IBD-TIFN_Taxman_100Pc_GG13-PPI.txt;miSeqRuns_UMCG-IBD-TIFN_Taxman_100Pc_GG13-Reducing_stomach_acid2.txt;miSeqRuns_UMCG-IBD-TIFN_Taxman_100Pc_GG13-ZICPPI.txt	1828	387	Increased	1.19014	0.23399	0.331023	6.77658e-05	4.01574e-05	8.30924e-05	5.22125e-05	4.57494e-05	3.15532e-05	2.91147e-05	2.6879e-05	0.000400578	1	426	45	52	26	33	8	341	11	0	0.666513
PPI	Increased	k__Bacteria|p__Firmicutes|c__Bacilli|o__Lactobacillales|f__Streptococcaceae|g__Streptococcus|s__alactolyticus	6.62978399080267E-4;7.99767841533513E-5;8.21794676580264E-4	345;1174;309	8;31;32	0.0448516637673003;0.879514962097505;0.648931325260687	0.393266110409303;0.990483578093088;0.88296123445052	2.0060429688155534;0.15158411615302886;0.4552473138124583	miSeqRuns_UMCG-IBD-TIFN_Taxman_100Pc_GG13-PPI.txt;miSeqRuns_UMCG-IBD-TIFN_Taxman_100Pc_GG13-Reducing_stomach_acid2.txt;miSeqRuns_UMCG-IBD-TIFN_Taxman_100Pc_GG13-ZICPPI.txt	1828	71	Increased	1.18014	0.237945	0.334984	4.22999e-05	2.99865e-05	2.53412e-05	8.22923e-06	0.000167102	7.2842e-05	1.30766e-06	2.18029e-05	0	0	73	19	5	4	18	12	50	3	30.1117	0.239104
PPI	Increased	k__Bacteria|p__Firmicutes|c__Clostridia|o__Clostridiales|f__Lachnospiraceae|g__Clostridium|s__symbiosum	-1.46211229808216E-4;1.46173119499535E-4;8.55726410798389E-4	345;1174;309	22;40;54	0.552638644635386;0.259532355930189;0.196721315732474	0.928384473225302;0.689127068017734;0.661023262436071	-0.5938108300652812;1.1274971236865978;1.2909491354062763	miSeqRuns_UMCG-IBD-TIFN_Taxman_100Pc_GG13-PPI.txt;miSeqRuns_UMCG-IBD-TIFN_Taxman_100Pc_GG13-Reducing_stomach_acid2.txt;miSeqRuns_UMCG-IBD-TIFN_Taxman_100Pc_GG13-ZICPPI.txt	1828	116	Increased	1.17636	0.23945	0.335475	4.10873e-06	1.31281e-05	1.42393e-06	2.17411e-06	1.76493e-05	4.12027e-05	2.80385e-06	1.36275e-06	0	0	156	17	20	4	40	11	96	2	0	0.38547
PPI	Decreased	k__Bacteria|p__Proteobacteria|c__Betaproteobacteria|o__Burkholderiales|f__Oxalobacteraceae|g__Oxalobacter|s__formigenes	-2.16431020782284E-4;-9.47179424186179E-4;-2.17309859082366E-4	345;1174;309	133;483;36	0.848213152352194;0.233605554345537;0.76581487598218	0.991109715557945;0.65966530416377;0.916973701654693	-0.1913988099517556;-1.1911223568375533;-0.2978536356749204	miSeqRuns_UMCG-IBD-TIFN_Taxman_100Pc_GG13-PPI.txt;miSeqRuns_UMCG-IBD-TIFN_Taxman_100Pc_GG13-Reducing_stomach_acid2.txt;miSeqRuns_UMCG-IBD-TIFN_Taxman_100Pc_GG13-ZICPPI.txt	1828	652	Decreased	-1.16017	0.245981	0.341593	8.59098e-05	4.97566e-05	9.97501e-05	6.37275e-05	2.70378e-05	2.29327e-05	8.35214e-05	5.4194e-05	0	0	731	60	112	34	29	7	590	19	0	0.905682
PPI	Decreased	k__Bacteria|p__Proteobacteria|c__Betaproteobacteria|o__Burkholderiales|f__Oxalobacteraceae|g__Oxalobacter	-2.1792553782196E-4;-9.45518797047246E-4;-2.21764303420619E-4	345;1174;309	133;483;37	0.847264203885098;0.235303291269834;0.761254915245777	0.991109715557945;0.660791064307162;0.916681238164939	-0.19261026662621272;-1.1868081806835966;-0.30383327416442757	miSeqRuns_UMCG-IBD-TIFN_Taxman_100Pc_GG13-PPI.txt;miSeqRuns_UMCG-IBD-TIFN_Taxman_100Pc_GG13-Reducing_stomach_acid2.txt;miSeqRuns_UMCG-IBD-TIFN_Taxman_100Pc_GG13-ZICPPI.txt	1828	653	Decreased	-1.1597	0.246173	0.341593	8.62022e-05	4.9858e-05	0.000100138	6.39426e-05	2.71251e-05	2.29327e-05	8.36306e-05	5.4194e-05	0	0	733	60	112	34	30	7	591	19	0	0.907994
PPI	Decreased	k__Bacteria|p__Firmicutes|c__Clostridia|o__Clostridiales|f__Lachnospiraceae|g__Ruminococcus|s__torques	-0.00271593959266864;-0.00148258823112904;-0.00354627974280961	345;1174;309	278;890;238	0.466381965226421;0.508323783601723;0.45347536866489	0.889539186148404;0.895011506110314;0.818582166055854	-0.7283784272398268;-0.6614499783821307;-0.7496336662596879	miSeqRuns_UMCG-IBD-TIFN_Taxman_100Pc_GG13-PPI.txt;miSeqRuns_UMCG-IBD-TIFN_Taxman_100Pc_GG13-Reducing_stomach_acid2.txt;miSeqRuns_UMCG-IBD-TIFN_Taxman_100Pc_GG13-ZICPPI.txt	1828	1406	Decreased	-1.15472	0.248206	0.342774	0.00157473	0.00172703	0.00121576	0.00113337	0.00308669	0.00305673	0.00164913	0.00131508	1.29225e-05	0	1677	149	238	71	191	42	1248	36	0	0.906364
PPI	Decreased	k__Bacteria|p__Firmicutes|c__Clostridia|o__Clostridiales|f__Clostridiaceae|g__02d06	-3.60134228244776E-4;-9.10201702204745E-4;-8.80954850164838E-4	345;1174;309	257;946;156	0.751882881136356;0.396429716164019;0.419468786662724	0.978807199921599;0.821632008854607;0.806298730751268	-0.31615760987009844;-0.8480148220567238;-0.8073431910589799	miSeqRuns_UMCG-IBD-TIFN_Taxman_100Pc_GG13-PPI.txt;miSeqRuns_UMCG-IBD-TIFN_Taxman_100Pc_GG13-Reducing_stomach_acid2.txt;miSeqRuns_UMCG-IBD-TIFN_Taxman_100Pc_GG13-ZICPPI.txt	1828	1359	Decreased	-1.14887	0.250608	0.34445	0.000211172	0.000179249	0.000247985	0.000259198	0.000144459	8.07768e-05	0.000129869	0.000139905	0	0	1561	135	218	71	125	29	1218	35	0	0.927292
PPI	Increased	k__Bacteria|p__Proteobacteria|c__Alphaproteobacteria|o__Rickettsiales|f__mitochondria|g__Oenothera|s__berteroana	8.74513994861833E-5;-7.92969248772342E-5;2.84148904220343E-4	345;1174;309	1;66;9	0.0383447669253365;0.649580455476745;0.138104630672736	0.366231651450152;0.967871433413119;0.598427046254707	2.071150145265582;-0.4543451063344762;1.4828862671541687	miSeqRuns_UMCG-IBD-TIFN_Taxman_100Pc_GG13-PPI.txt;miSeqRuns_UMCG-IBD-TIFN_Taxman_100Pc_GG13-Reducing_stomach_acid2.txt;miSeqRuns_UMCG-IBD-TIFN_Taxman_100Pc_GG13-ZICPPI.txt	1828	76	Increased	1.14534	0.252068	0.344824	2.05615e-06	2.16733e-06	2.86657e-06	1.44687e-06	9.06888e-07	4.79667e-06	0	4.72549e-07	0	0	74	8	0	4	6	3	68	1	62.8477	0.067771
PPI	Increased	k__Bacteria|p__Firmicutes|c__Bacilli|o__Lactobacillales|f__Aerococcaceae|g__Abiotrophia|s__defectiva	4.83642838289162E-4;1.49605671866922E-4;-1.96534323373269E-4	345;1174;309	20;72;39	0.0505668729292468;0.519528179583324;0.583709472627357	0.413367624993668;0.901274647957303;0.852076756005853	1.9551372473974722;0.6440728737726326;-0.5479744121547714	miSeqRuns_UMCG-IBD-TIFN_Taxman_100Pc_GG13-PPI.txt;miSeqRuns_UMCG-IBD-TIFN_Taxman_100Pc_GG13-Reducing_stomach_acid2.txt;miSeqRuns_UMCG-IBD-TIFN_Taxman_100Pc_GG13-ZICPPI.txt	1828	131	Increased	1.14023	0.254189	0.346092	6.06643e-06	5.10265e-06	4.74557e-06	5.24875e-06	1.67245e-05	4.5605e-06	2.09175e-06	5.45686e-06	0.00251252	1	159	19	14	7	33	6	112	6	38.2246	0.198143
PPI	Increased	k__Bacteria|p__Synergistetes|c__Synergistia|o__Synergistales|f__Synergistaceae	7.45350606411733E-4;2.19302690735196E-4;1.13589757074838E-4	345;1174;309	33;95;2	0.445389809300023;0.654589225610307;0.284991483672044	0.881829426768527;0.967871433413119;0.750531902126083	0.7631233943511385;0.44739591382726984;1.0691735302311045	miSeqRuns_UMCG-IBD-TIFN_Taxman_100Pc_GG13-PPI.txt;miSeqRuns_UMCG-IBD-TIFN_Taxman_100Pc_GG13-Reducing_stomach_acid2.txt;miSeqRuns_UMCG-IBD-TIFN_Taxman_100Pc_GG13-ZICPPI.txt	1828	130	Increased	1.12965	0.258625	0.350102	2.27479e-05	2.11722e-05	2.19064e-05	2.39334e-05	1.84232e-07	1.84227e-06	4.46944e-05	3.85533e-05	0	0	139	20	28	14	1	1	110	5	0	0.72269
PPI	Increased	k__Bacteria|p__Fusobacteria|c__Fusobacteriia|o__Fusobacteriales	-3.55811043554123E-4;6.17740293446606E-4;1.91047598593166E-4	345;1174;309	52;161;122	0.689555392788137;0.159010655081232;0.683933503162045	0.958935404278433;0.548206061376516;0.892405863692823	-0.39945850506418956;1.4084067721133886;0.40710141638769376	miSeqRuns_UMCG-IBD-TIFN_Taxman_100Pc_GG13-PPI.txt;miSeqRuns_UMCG-IBD-TIFN_Taxman_100Pc_GG13-Reducing_stomach_acid2.txt;miSeqRuns_UMCG-IBD-TIFN_Taxman_100Pc_GG13-ZICPPI.txt	1828	335	Increased	1.12253	0.261638	0.350102	0.000518936	0.00108676	1.78269e-05	1.87624e-05	0.00333217	0.00376335	3.69453e-05	1.10123e-05	0	0	417	55	45	24	95	25	277	6	0	0.591898
PPI	Decreased	k__Bacteria|p__Firmicutes|c__Clostridia|o__SHA-98	-9.92546837570137E-5;-1.33473153118309E-4;-9.76857809293087E-4	345;1174;309	69;304;33	0.865556884652047;0.768205613203459;0.0494738690972408	0.991109715557945;0.989855574405985;0.453840570845914	-0.16930482031772773;-0.29472284099255674;-1.9644850433393004	miSeqRuns_UMCG-IBD-TIFN_Taxman_100Pc_GG13-PPI.txt;miSeqRuns_UMCG-IBD-TIFN_Taxman_100Pc_GG13-Reducing_stomach_acid2.txt;miSeqRuns_UMCG-IBD-TIFN_Taxman_100Pc_GG13-ZICPPI.txt	1828	406	Decreased	-1.11742	0.263814	0.350102	2.51084e-05	1.52606e-05	2.94801e-05	2.31125e-05	1.4462e-05	4.0451e-06	1.77249e-05	1.32136e-05	0	0	457	39	61	27	29	4	367	8	26.635	0.25588
PPI	Increased	k__Bacteria|p__Firmicutes|c__Erysipelotrichi|o__Erysipelotrichales|f__Erysipelotrichaceae|g__Bulleidia|s__moorei	-1.67449580374428E-4;4.22101811825892E-4;6.56584049513076E-4	345;1174;309	157;540;113	0.789700912716613;0.360220501790774;0.225463079835661	0.985218332959347;0.80082891580893;0.702310298029278	-0.26669901455512746;0.9149450051625447;1.2121288026888837	miSeqRuns_UMCG-IBD-TIFN_Taxman_100Pc_GG13-PPI.txt;miSeqRuns_UMCG-IBD-TIFN_Taxman_100Pc_GG13-Reducing_stomach_acid2.txt;miSeqRuns_UMCG-IBD-TIFN_Taxman_100Pc_GG13-ZICPPI.txt	1828	810	Increased	1.11572	0.26454	0.350102	3.58416e-05	2.93553e-05	3.39066e-05	3.57381e-05	5.62444e-05	2.56949e-05	2.60251e-05	2.12717e-05	0	0	942	86	133	44	90	21	719	21	0	0.567603
PPI	Decreased	k__Bacteria|p__Bacteroidetes|c__Bacteroidia|o__Bacteroidales|f__Barnesiellaceae	-1.74917376019671E-4;-8.42662498279362E-5;2.59912910125987E-5	345;1174;309	5;26;2	0.13023032666088;0.490698163743555;0.813051352146122	0.627269627171172;0.881358401865779;0.933399745062759	-1.5131942410103596;-0.6891988129271712;0.23649143571077208	miSeqRuns_UMCG-IBD-TIFN_Taxman_100Pc_GG13-PPI.txt;miSeqRuns_UMCG-IBD-TIFN_Taxman_100Pc_GG13-Reducing_stomach_acid2.txt;miSeqRuns_UMCG-IBD-TIFN_Taxman_100Pc_GG13-ZICPPI.txt	1828	33	Decreased	-1.11247	0.265937	0.350102	0.00241478	0.00176068	0.00188056	0.00184921	0.00450399	0.00222364	0.00265974	0.00104417	1.58066e-05	0	1755	155	244	87	165	35	1346	33	79.838	0.00701423
PPI	Decreased	k__Bacteria|p__Firmicutes|c__Bacilli|o__Lactobacillales|f__Aerococcaceae|g__Facklamia	-0.010158193634429;0.00292995026115734;-0.0160638019105566	345;1174;309	281;1024;206	0.0259287321280609;0.321766100646884;0.0223984899137003	0.301481903998323;0.760844354123617;0.36136468696492	-2.227277517809579;0.9908351129882073;-2.283541522231385	miSeqRuns_UMCG-IBD-TIFN_Taxman_100Pc_GG13-PPI.txt;miSeqRuns_UMCG-IBD-TIFN_Taxman_100Pc_GG13-Reducing_stomach_acid2.txt;miSeqRuns_UMCG-IBD-TIFN_Taxman_100Pc_GG13-ZICPPI.txt	1828	1511	Decreased	-1.11241	0.265962	0.350102	1.13033e-06	3.18524e-07	1.39454e-06	3.55455e-07	5.42523e-07	5.28333e-07	6.37716e-07	0	0.000947709	1	36	3	5	2	1	1	30	0	0	0.453143
PPI	Decreased	k__Bacteria|p__Bacteroidetes|c__Bacteroidia|o__Bacteroidales|f__Bacteroidaceae|g__Bacteroides|s__ovatus	-0.00158856227851529;-0.00153871299303208;-0.00659112932132911	345;1174;309	303;1015;248	0.734373758933389;0.466990594852722;0.354420226373877	0.973371864020578;0.86103423201942;0.784073933636404	-0.3393132541541594;-0.7273842585380244;-0.9260495576894904	miSeqRuns_UMCG-IBD-TIFN_Taxman_100Pc_GG13-PPI.txt;miSeqRuns_UMCG-IBD-TIFN_Taxman_100Pc_GG13-Reducing_stomach_acid2.txt;miSeqRuns_UMCG-IBD-TIFN_Taxman_100Pc_GG13-ZICPPI.txt	1828	1566	Decreased	-1.11107	0.26654	0.350102	0.00205652	0.00282152	0.00119313	0.00173189	0.00560468	0.00529792	0.00230924	0.00202326	9.17919e-06	0	1844	163	257	77	196	44	1391	42	0	0.874888
PPI	Decreased	k__Bacteria|p__Firmicutes|c__Clostridia|o__Clostridiales|f__Ruminococcaceae|g__Ruminococcus|s__flavefaciens	-7.58005553546396E-4;-3.54180911072956E-4;7.77456262977244E-4	345;1174;309	106;341;22	0.111364702185956;0.197649407470941;0.135592685303099	0.585770410932084;0.61109095562879;0.597522184669366	-1.5920890274535033;-1.2882774282064755;1.4924062204772128	miSeqRuns_UMCG-IBD-TIFN_Taxman_100Pc_GG13-PPI.txt;miSeqRuns_UMCG-IBD-TIFN_Taxman_100Pc_GG13-Reducing_stomach_acid2.txt;miSeqRuns_UMCG-IBD-TIFN_Taxman_100Pc_GG13-ZICPPI.txt	1828	469	Decreased	-1.11048	0.266792	0.350102	0.000173984	8.80049e-05	0.000197562	7.45837e-05	8.98634e-06	2.66089e-05	0.000223873	0.000186289	0	0	544	36	96	21	16	6	432	9	61.4533	0.0747014
PPI	Increased	k__Bacteria|p__Firmicutes|c__Bacilli|o__Bacillales|f__Bacillaceae|g__Bacillus|s__cereus	9.22836387572761E-6;8.35354891079152E-5;7.9127442631227E-5	345;1174;309	4;18;3	0.925921367244976;0.279414763083852;0.627840634864308	0.991109715557945;0.703872257620371;0.870623084104976	0.09297758676822196;1.0816349615713325;0.4847684080688581	miSeqRuns_UMCG-IBD-TIFN_Taxman_100Pc_GG13-PPI.txt;miSeqRuns_UMCG-IBD-TIFN_Taxman_100Pc_GG13-Reducing_stomach_acid2.txt;miSeqRuns_UMCG-IBD-TIFN_Taxman_100Pc_GG13-ZICPPI.txt	1828	25	Increased	1.10652	0.268503	0.350761	5.14402e-07	1.32337e-06	4.32549e-07	1.43698e-06	1.03795e-06	1.87077e-06	3.82284e-07	4.58824e-07	6.95434e-07	1	26	4	3	2	2	1	21	1	0	0.909736
PPI	Decreased	k__Bacteria|p__Proteobacteria|c__Betaproteobacteria|o__Burkholderiales|f__Oxalobacteraceae	-1.63454424882629E-4;-0.00101514964732827;-6.61482757415391E-5	345;1174;309	137;502;43	0.888594505415655;0.210294116662844;0.929812032370331	0.991109715557945;0.629737447472893;0.969612542949064	-0.14008288199464233;-1.2527571052098225;-0.08808133355959963	miSeqRuns_UMCG-IBD-TIFN_Taxman_100Pc_GG13-PPI.txt;miSeqRuns_UMCG-IBD-TIFN_Taxman_100Pc_GG13-Reducing_stomach_acid2.txt;miSeqRuns_UMCG-IBD-TIFN_Taxman_100Pc_GG13-ZICPPI.txt	1828	682	Decreased	-1.10102	0.270887	0.351831	9.23807e-05	5.29331e-05	0.00010635	6.59303e-05	2.89198e-05	2.54209e-05	9.33406e-05	6.00706e-05	0	0	766	64	116	36	34	9	616	19	0	0.825087
PPI	Decreased	k__Bacteria|p__Firmicutes|c__Bacilli|o__Lactobacillales|f__Leuconostocaceae|g__Leuconostoc|s__mesenteroides	-3.51409273256582E-5;-3.22466530382082E-4;-6.39877781678681E-4	345;1174;309	77;438;79	0.911038072024084;0.559972354846703;0.155915452541955	0.991109715557945;0.9260794470301;0.62466894257695	-0.11172926811260775;-0.5828825702048187;-1.4189436244804758	miSeqRuns_UMCG-IBD-TIFN_Taxman_100Pc_GG13-PPI.txt;miSeqRuns_UMCG-IBD-TIFN_Taxman_100Pc_GG13-Reducing_stomach_acid2.txt;miSeqRuns_UMCG-IBD-TIFN_Taxman_100Pc_GG13-ZICPPI.txt	1828	594	Decreased	-1.09904	0.271749	0.351831	0.00011285	4.66361e-05	0.000111984	6.69928e-05	0.000224504	3.98933e-05	2.29604e-05	1.50527e-05	7.16017e-05	0	661	62	67	39	64	14	530	9	0	0.560531
PPI	Decreased	k__Bacteria|p__Firmicutes|c__Clostridia|o__Clostridiales|f__Ruminococcaceae|g__Oscillospira	-0.00114541186167507;-0.00137194181091849;-0.0065286039665394	345;1174;309	345;1173;301	0.763000464618703;0.566993736715642;0.22142812376613	0.980389249678797;0.930702874481136;0.697740475977662	-0.3015430013611348;-0.5724845694379669;-1.222739444349408	miSeqRuns_UMCG-IBD-TIFN_Taxman_100Pc_GG13-PPI.txt;miSeqRuns_UMCG-IBD-TIFN_Taxman_100Pc_GG13-Reducing_stomach_acid2.txt;miSeqRuns_UMCG-IBD-TIFN_Taxman_100Pc_GG13-ZICPPI.txt	1828	1819	Decreased	-1.0925	0.274612	0.353312	0.00613609	0.00593531	0.00603577	0.00583365	0.00775981	0.00733023	0.00515523	0.00449154	0	0	2123	207	289	98	235	58	1599	51	0	0.697609
PPI	Decreased	k__Bacteria|p__Firmicutes|c__Clostridia|o__Clostridiales|f__Lachnospiraceae|g__Lachnobacterium	-2.40636231409183E-4;-4.72331412492968E-4;-0.00116535167919039	345;1174;309	110;456;75	0.751329356904915;0.440025159828924;0.416006904272305	0.978807199921599;0.843707060605979;0.805447329897322	-0.31688698638860124;-0.7721507286070944;-0.8133683423576936	miSeqRuns_UMCG-IBD-TIFN_Taxman_100Pc_GG13-PPI.txt;miSeqRuns_UMCG-IBD-TIFN_Taxman_100Pc_GG13-Reducing_stomach_acid2.txt;miSeqRuns_UMCG-IBD-TIFN_Taxman_100Pc_GG13-ZICPPI.txt	1828	641	Decreased	-1.09087	0.275329	0.353312	8.12441e-05	5.38361e-05	7.49348e-05	8.49022e-05	0.000120773	2.95173e-05	7.17494e-05	2.21417e-05	0	0	732	60	95	32	59	15	578	13	0	0.919339
PPI	Increased	k__Bacteria|p__Bacteroidetes|c__Bacteroidia|o__Bacteroidales|f__Bacteroidaceae|g__Bacteroides|s__coprophilus	-0.00183644259336398;0.00465904701895612;-0.00412710134602366	345;1174;309	22;115;15	0.427204094358208;0.0197038799073662;0.281056607171933	0.869740146425847;0.16233168792914;0.74935945496474	-0.7939851192918572;2.3319393899286878;-1.0779487967861712	miSeqRuns_UMCG-IBD-TIFN_Taxman_100Pc_GG13-PPI.txt;miSeqRuns_UMCG-IBD-TIFN_Taxman_100Pc_GG13-Reducing_stomach_acid2.txt;miSeqRuns_UMCG-IBD-TIFN_Taxman_100Pc_GG13-ZICPPI.txt	1828	152	Increased	1.08068	0.279839	0.356986	0.00036973	0.00048255	0.000302304	0.000979994	0.000818275	2.69912e-05	0.000246492	5.28723e-05	0	0	171	15	20	12	14	1	137	2	67.0101	0.0482563
PPI	Increased	k__Bacteria|p__Firmicutes|c__Clostridia|o__Clostridiales|[f__Ruminococcaceae/f__Veillonellaceae]	5.43410645239926E-5;1.72094818778581E-4;0.00311128147300079	345;1174;309	17;49;13	0.94565251469902;0.764290679912772;0.0497774317614154	0.993681603305654;0.988543633899154;0.454815712121425	0.06816722779370972;0.29985117280601514;1.961871628036059	miSeqRuns_UMCG-IBD-TIFN_Taxman_100Pc_GG13-PPI.txt;miSeqRuns_UMCG-IBD-TIFN_Taxman_100Pc_GG13-Reducing_stomach_acid2.txt;miSeqRuns_UMCG-IBD-TIFN_Taxman_100Pc_GG13-ZICPPI.txt	1828	79	Increased	1.07652	0.281695	0.356986	3.14658e-05	0.000128427	2.99323e-05	2.25245e-05	4.38359e-05	0.000395578	2.68545e-05	1.97077e-05	0	0	95	9	15	4	10	3	70	2	28.1765	0.248503
PPI	Decreased	k__Bacteria|p__Firmicutes|c__Clostridia|o__Clostridiales|f__Lachnospiraceae|g__Dorea	4.21135171326388E-4;-0.00235260739712828;-0.0110740709006883	345;1174;309	345;1174;306	0.933395499171851;0.497343631225384;0.166735193448094	0.991109715557945;0.885404612834199;0.637120141321575	0.0835735477573827;-0.6786752819880483;-1.3827706748255895	miSeqRuns_UMCG-IBD-TIFN_Taxman_100Pc_GG13-PPI.txt;miSeqRuns_UMCG-IBD-TIFN_Taxman_100Pc_GG13-Reducing_stomach_acid2.txt;miSeqRuns_UMCG-IBD-TIFN_Taxman_100Pc_GG13-ZICPPI.txt	1828	1825	Decreased	-1.07609	0.281886	0.356986	0.0165885	0.0174404	0.0153569	0.014956	0.0220814	0.0223304	0.0165893	0.0165102	0.000100899	0	2129	209	289	99	238	59	1602	51	0	0.542899
PPI	Decreased	k__Bacteria|p__Bacteroidetes|c__Bacteroidia|o__Bacteroidales|f__Prevotellaceae|g__Prevotella|s__stercorea	-0.0022717692606244;-0.0034850853412835;0.00332618320607587	345;1174;309	35;154;12	0.54976598931446;0.115221610534248;0.273935369054539	0.928384473225302;0.471516442449873;0.744460899899106	-0.5981108226735143;-1.5751509301506474;1.0940447114860736	miSeqRuns_UMCG-IBD-TIFN_Taxman_100Pc_GG13-PPI.txt;miSeqRuns_UMCG-IBD-TIFN_Taxman_100Pc_GG13-Reducing_stomach_acid2.txt;miSeqRuns_UMCG-IBD-TIFN_Taxman_100Pc_GG13-ZICPPI.txt	1828	201	Decreased	-1.07235	0.283564	0.357551	0.000489747	0.00025723	0.000474364	0.000106201	0.000378526	0.000571558	0.000639716	0.000180608	0	0	220	15	29	6	7	5	184	4	30.6961	0.236237
PPI	Decreased	k__Bacteria|p__Firmicutes|c__Clostridia|o__Clostridiales|f__Veillonellaceae|g__Mitsuokella|s__multacida	-1.19021669998953E-4;-3.46245004591091E-5;-1.65235394298956E-4	345;1174;309	5;18;3	0.413144629676668;0.664926371252521;0.383788461493831	0.868021040128757;0.970177691035165;0.792529113982617	-0.8183723069500304;-0.43312168284468117;-0.8709371673519556	miSeqRuns_UMCG-IBD-TIFN_Taxman_100Pc_GG13-PPI.txt;miSeqRuns_UMCG-IBD-TIFN_Taxman_100Pc_GG13-Reducing_stomach_acid2.txt;miSeqRuns_UMCG-IBD-TIFN_Taxman_100Pc_GG13-ZICPPI.txt	1828	26	Decreased	-1.06071	0.288823	0.361526	8.71039e-07	1.3381e-07	5.78477e-07	2.83838e-07	2.03215e-06	0	9.91024e-07	0	0	0	33	1	5	1	3	0	25	0	0	0.782406
PPI	Increased	k__Bacteria|p__Proteobacteria|c__Gammaproteobacteria|o__Pasteurellales|f__Pasteurellaceae|g__Actinobacillus|s__parahaemolyticus	3.76016439822906E-5;-2.72416462919483E-6;8.94426295709794E-4	345;1174;309	23;55;18	0.893522483678364;0.986410308753586;0.0135260526699531	0.991109715557945;0.997461658555456;0.29579925019209	0.13384836226599342;-0.017032975732618083;2.4696097334640426	miSeqRuns_UMCG-IBD-TIFN_Taxman_100Pc_GG13-PPI.txt;miSeqRuns_UMCG-IBD-TIFN_Taxman_100Pc_GG13-Reducing_stomach_acid2.txt;miSeqRuns_UMCG-IBD-TIFN_Taxman_100Pc_GG13-ZICPPI.txt	1828	96	Increased	1.05986	0.28921	0.361526	2.86492e-06	4.88675e-06	2.36861e-06	1.24737e-06	4.35605e-06	1.34378e-05	3.4676e-06	1.89137e-06	0	0	110	15	19	5	11	7	80	3	59.951	0.0823365
PPI	Decreased	k__Bacteria|p__Firmicutes|c__Clostridia|o__Clostridiales|f__Clostridiaceae|g__Clostridium|s__sartagoforme	-2.46729165965991E-4;-3.411530091559E-4;-1.05736524526022E-4	345;1174;309	88;386;76	0.53514479857188;0.404937759769333;0.773929339690208	0.9234177729923;0.823563197372858;0.920435428659796	-0.620171628013092;-0.8328350579094933;-0.2872389824181205	miSeqRuns_UMCG-IBD-TIFN_Taxman_100Pc_GG13-PPI.txt;miSeqRuns_UMCG-IBD-TIFN_Taxman_100Pc_GG13-Reducing_stomach_acid2.txt;miSeqRuns_UMCG-IBD-TIFN_Taxman_100Pc_GG13-ZICPPI.txt	1828	550	Decreased	-1.05495	0.29145	0.361537	2.08108e-05	4.63293e-05	2.43241e-05	2.87333e-05	1.73744e-05	0.000104469	1.06079e-05	1.20861e-05	0	0	631	53	77	29	60	15	494	9	0	0.976373
PPI	Decreased	k__Bacteria|p__Firmicutes|c__Clostridia|o__Clostridiales|f__Lachnospiraceae|g__Epulopiscium	-3.88996583472397E-4;-9.45898986152147E-4;-0.00133008805942643	345;1174;309	31;130;29	0.804919842273789;0.38849448079196;0.536513231778513	0.989823287883005;0.81999072343879;0.84332594246358	-0.2469849877455462;-0.8623508457520346;-0.618094220573328	miSeqRuns_UMCG-IBD-TIFN_Taxman_100Pc_GG13-PPI.txt;miSeqRuns_UMCG-IBD-TIFN_Taxman_100Pc_GG13-Reducing_stomach_acid2.txt;miSeqRuns_UMCG-IBD-TIFN_Taxman_100Pc_GG13-ZICPPI.txt	1828	190	Decreased	-1.0525	0.292568	0.361537	0.00012793	9.52503e-05	0.000112801	6.36177e-05	0.000233915	0.000109695	9.58276e-05	0.00013966	0	0	226	17	26	10	27	3	173	4	0	0.961306
PPI	Increased	k__Bacteria|p__Firmicutes|c__Clostridia|o__Clostridiales|f__Lachnospiraceae|g__Ruminococcus|s__gnavus	0.00224137323343085;6.92946233830213E-4;0.00889481906130289	345;1174;309	344;1171;304	0.433877855060349;0.679320655988809;0.354859073183869	0.875362617931817;0.974238719857272;0.784215704954823	0.7825730797190334;0.413390333128117;0.9252054037477231	miSeqRuns_UMCG-IBD-TIFN_Taxman_100Pc_GG13-PPI.txt;miSeqRuns_UMCG-IBD-TIFN_Taxman_100Pc_GG13-Reducing_stomach_acid2.txt;miSeqRuns_UMCG-IBD-TIFN_Taxman_100Pc_GG13-ZICPPI.txt	1828	1819	Increased	1.05165	0.292959	0.361537	0.00611471	0.00964684	0.00309458	0.00295921	0.0190195	0.0239058	0.00658733	0.00585343	1.35711e-05	0	2121	208	288	98	236	59	1597	51	0	0.765925
PPI	Decreased	k__Bacteria|p__Actinobacteria|c__Actinobacteria|o__Bifidobacteriales|f__Bifidobacteriaceae|g__Bifidobacterium|s__pseudolongum	2.99245254727106E-4;-0.0012754855440692;-2.99317367338332E-5	345;1174;309	95;877;25	0.454066389623434;0.103431720548972;0.898754440753886	0.889539186148404;0.445662435114739;0.959158915846697	0.748652981845395;-1.628439534246139;-0.12723495418207012	miSeqRuns_UMCG-IBD-TIFN_Taxman_100Pc_GG13-PPI.txt;miSeqRuns_UMCG-IBD-TIFN_Taxman_100Pc_GG13-Reducing_stomach_acid2.txt;miSeqRuns_UMCG-IBD-TIFN_Taxman_100Pc_GG13-ZICPPI.txt	1828	997	Decreased	-1.03209	0.302028	0.37115	0.000103353	6.25054e-05	0.000151509	0.000126232	2.66364e-06	2.71667e-06	8.18971e-06	9.14118e-06	0	0	1014	82	79	65	22	3	913	14	7.54723	0.339041
PPI	Decreased	k__Bacteria|p__Firmicutes|c__Clostridia|o__Clostridiales|f__Lachnospiraceae|g__Coprococcus|s__eutactus	-0.0161935883116746;-0.00525113277909397;0.00552934233877448	345;1174;309	235;854;76	0.066595150588153;0.326708656395981;0.170014241991038	0.46828233533619;0.767055106320998;0.637120141321575	-1.8343965552750403;-0.9807649701785112;1.3721580482678306	miSeqRuns_UMCG-IBD-TIFN_Taxman_100Pc_GG13-PPI.txt;miSeqRuns_UMCG-IBD-TIFN_Taxman_100Pc_GG13-Reducing_stomach_acid2.txt;miSeqRuns_UMCG-IBD-TIFN_Taxman_100Pc_GG13-ZICPPI.txt	1828	1165	Decreased	-1.01875	0.308323	0.376651	0.0039768	0.00264646	0.0043904	0.00356044	0.000479582	0.00139768	0.00535466	0.00234144	6.84059e-05	0	1315	108	205	65	58	17	1052	26	61.3293	0.0753252
PPI	Decreased	k__Bacteria|p__Proteobacteria|c__Gammaproteobacteria|o__Enterobacteriales|f__Enterobacteriaceae|g__Pantoea|s__agglomerans	-1.04043493713603E-4;-4.78734413047215E-5;-4.80952108395669E-5	345;1174;309	3;13;5	0.345500711917721;0.610102344990223;0.630187280342442	0.829637239970279;0.950749200097687;0.872969711294722	-0.943352340989439;-0.5099273716349477;-0.4814632674814752	miSeqRuns_UMCG-IBD-TIFN_Taxman_100Pc_GG13-PPI.txt;miSeqRuns_UMCG-IBD-TIFN_Taxman_100Pc_GG13-Reducing_stomach_acid2.txt;miSeqRuns_UMCG-IBD-TIFN_Taxman_100Pc_GG13-ZICPPI.txt	1828	21	Decreased	-1.01642	0.309427	0.376651	7.31111e-07	1.57286e-07	8.23673e-07	2.0101e-07	5.12863e-07	2.18833e-07	5.68803e-07	0	0	0	24	3	3	1	3	2	18	0	0	0.840033
PPI	Decreased	k__Bacteria|p__Firmicutes|c__Clostridia|o__Clostridiales|f__Lachnospiraceae|g__Butyrivibrio|s__crossotus	-1.34191420932165E-4;-0.0011251291811816;-0.00263307310122648	345;1174;309	103;267;21	0.679347558665586;0.613522982407313;0.295551228023842	0.956454791693469;0.953458446042655;0.756747290180048	-0.4133536082157502;-0.5050510476697674;-1.046021235796768	miSeqRuns_UMCG-IBD-TIFN_Taxman_100Pc_GG13-PPI.txt;miSeqRuns_UMCG-IBD-TIFN_Taxman_100Pc_GG13-Reducing_stomach_acid2.txt;miSeqRuns_UMCG-IBD-TIFN_Taxman_100Pc_GG13-ZICPPI.txt	1828	391	Decreased	-1.01438	0.310401	0.376651	0.00050378	0.000289612	0.000486538	0.000532229	0.000353777	3.16167e-06	0.000693005	0.000155648	0	0	462	33	90	15	15	6	357	12	0	0.782263
PPI	Increased	k__Bacteria|p__Bacteroidetes|c__Bacteroidia|o__Bacteroidales|f__Porphyromonadaceae|g__Parabacteroides|s__gordonii	3.61515623856533E-4;2.74709362904459E-5;6.37477521522077E-4	345;1174;309	12;31;8	0.19578550099857;0.91547702169116;0.378716946753402	0.70273878801426;0.990483578093088;0.791449201518075	1.2936524375827647;0.10613275686597605;0.8802628242962101	miSeqRuns_UMCG-IBD-TIFN_Taxman_100Pc_GG13-PPI.txt;miSeqRuns_UMCG-IBD-TIFN_Taxman_100Pc_GG13-Reducing_stomach_acid2.txt;miSeqRuns_UMCG-IBD-TIFN_Taxman_100Pc_GG13-ZICPPI.txt	1828	51	Increased	1.00897	0.312989	0.378209	5.3947e-06	3.09091e-05	6.18645e-06	2.29831e-06	6.59216e-06	9.35257e-05	1.45104e-06	1.27811e-05	0	0	59	7	10	4	6	1	43	2	0	0.486353
PPI	Increased	k__Bacteria|p__Proteobacteria|c__Gammaproteobacteria|o__Enterobacteriales|f__Enterobacteriaceae|g__Shigella|s__sonnei	-5.87716582736669E-5;1.21790246437757E-4;3.08178355442598E-5	345;1174;309	5;24;17	0.472920687278522;0.118193873442963;0.873335629935182	0.893798613412814;0.479728074562615;0.951125225847678	-0.7177350179076089;1.5623996332838173;0.15942298645288633	miSeqRuns_UMCG-IBD-TIFN_Taxman_100Pc_GG13-PPI.txt;miSeqRuns_UMCG-IBD-TIFN_Taxman_100Pc_GG13-Reducing_stomach_acid2.txt;miSeqRuns_UMCG-IBD-TIFN_Taxman_100Pc_GG13-ZICPPI.txt	1828	46	Increased	1.00584	0.314495	0.378452	5.55626e-07	1.43586e-06	4.58009e-07	1.34141e-06	1.27477e-06	2.81217e-06	3.19031e-07	0	0	0	52	8	5	4	11	4	36	0	0	0.373449
PPI	Decreased	k__Bacteria|p__Firmicutes|c__Clostridia|o__Clostridiales|f__Clostridiaceae|g__Clostridium|s__botulinum	1.24183209107709E-5;-1.22315178630585E-4;2.2128583636278E-5	345;1174;309	9;40;12	0.898686669430695;0.161697935332503;0.867227188699025	0.991109715557945;0.552866719017119;0.9502998918379	0.12732058372162433;-1.3993837561832427;0.16718156572851575	miSeqRuns_UMCG-IBD-TIFN_Taxman_100Pc_GG13-PPI.txt;miSeqRuns_UMCG-IBD-TIFN_Taxman_100Pc_GG13-Reducing_stomach_acid2.txt;miSeqRuns_UMCG-IBD-TIFN_Taxman_100Pc_GG13-ZICPPI.txt	1828	61	Decreased	-0.99741	0.318566	0.381767	6.83053e-07	3.49762e-07	7.40633e-07	5.24242e-08	8.49004e-07	6.09333e-07	3.30484e-07	6.21569e-07	0	0	71	5	7	1	9	3	55	1	0	0.604228
PPI	Increased	k__Bacteria|p__Firmicutes|c__Clostridia|o__Clostridiales|f__Clostridiaceae|g__Clostridium	0.00391244283702663;0.00272251592243237;-0.00182711889656085	345;1174;309	343;1171;298	0.367699648389336;0.371214583627833;0.740418050366234	0.85246888535102;0.807373721291159;0.906076605742046	0.9007906338476219;0.8942005769249284;-0.33129978940084776	miSeqRuns_UMCG-IBD-TIFN_Taxman_100Pc_GG13-PPI.txt;miSeqRuns_UMCG-IBD-TIFN_Taxman_100Pc_GG13-Reducing_stomach_acid2.txt;miSeqRuns_UMCG-IBD-TIFN_Taxman_100Pc_GG13-ZICPPI.txt	1828	1812	Increased	0.971728	0.331186	0.394448	0.00621286	0.00745343	0.00661442	0.00900294	0.00591056	0.00671442	0.00497127	0.005315	0.000137572	0	2111	207	288	98	231	59	1592	50	0	0.678235
PPI	Decreased	k__Bacteria|p__Firmicutes|c__Clostridia|o__Clostridiales|f__Tissierellaceae|g__Finegoldia	2.98434706109776E-4;-1.14405661363167E-4;-0.00215334113925868	345;1174;309	79;400;117	0.465748472178109;0.794531338403887;0.00870925806484637	0.889539186148404;0.990483578093088;0.24037552258976	0.7294139744128767;-0.2604309932133958;-2.623260785050195	miSeqRuns_UMCG-IBD-TIFN_Taxman_100Pc_GG13-PPI.txt;miSeqRuns_UMCG-IBD-TIFN_Taxman_100Pc_GG13-Reducing_stomach_acid2.txt;miSeqRuns_UMCG-IBD-TIFN_Taxman_100Pc_GG13-ZICPPI.txt	1828	596	Decreased	-0.970358	0.331868	0.394448	4.65984e-05	4.24653e-05	3.21996e-05	3.09259e-05	0.000151056	8.05213e-05	1.30493e-05	2.00938e-05	0	0	702	54	67	28	98	15	537	11	69.4179	0.0380108
PPI	Decreased	k__Bacteria|p__Proteobacteria|c__Gammaproteobacteria|o__Enterobacteriales|f__Enterobacteriaceae|g__Pantoea	-1.03356471750651E-4;-4.90924422835573E-5;-4.42716728805363E-5	345;1174;309	4;14;7	0.363218924585118;0.611679163866335;0.703623140520354	0.84966477990401;0.95171377578702;0.899361165238728	-0.9092485830624537;-0.5076780221671064;-0.3804341881445784	miSeqRuns_UMCG-IBD-TIFN_Taxman_100Pc_GG13-PPI.txt;miSeqRuns_UMCG-IBD-TIFN_Taxman_100Pc_GG13-Reducing_stomach_acid2.txt;miSeqRuns_UMCG-IBD-TIFN_Taxman_100Pc_GG13-ZICPPI.txt	1828	25	Decreased	-0.958269	0.337927	0.400011	7.99638e-07	2.24905e-07	8.7594e-07	2.0101e-07	6.93361e-07	4.555e-07	6.04443e-07	0	0	0	29	4	4	1	4	3	21	0	0	0.856021
PPI	Decreased	k__Bacteria|p__Firmicutes|c__Clostridia|o__Clostridiales|[f__Clostridiaceae/f__Peptostreptococcaceae]	2.36797652445267E-4;-3.16485799904884E-4;-8.97554337479301E-4	345;1174;309	86;383;89	0.616589357626094;0.491137420740162;0.132693226702245	0.938249608898661;0.881358401865779;0.593550187667558	0.5006899339567881;-0.6885008729741667;-1.5035657065102255	miSeqRuns_UMCG-IBD-TIFN_Taxman_100Pc_GG13-PPI.txt;miSeqRuns_UMCG-IBD-TIFN_Taxman_100Pc_GG13-Reducing_stomach_acid2.txt;miSeqRuns_UMCG-IBD-TIFN_Taxman_100Pc_GG13-ZICPPI.txt	1828	558	Decreased	-0.952423	0.340883	0.40066	4.88608e-05	3.96123e-05	3.95052e-05	4.61765e-05	0.000120745	3.76757e-05	2.37164e-05	2.91484e-05	0	0	645	53	72	28	73	14	500	11	3.76864	0.353751
PPI	Increased	k__Bacteria|p__Firmicutes|c__Clostridia|o__Clostridiales|f__Mogibacteriaceae|g__Mogibacterium	9.40240617079374E-4;-1.11265630349445E-4;9.79789555981313E-4	345;1174;309	195;767;165	0.208606455038687;0.865196129362241;0.188350070450185	0.709375629123383;0.990483578093088;0.654320296824339	1.25740655995777;-0.16976350460136616;1.3154757250634455	miSeqRuns_UMCG-IBD-TIFN_Taxman_100Pc_GG13-PPI.txt;miSeqRuns_UMCG-IBD-TIFN_Taxman_100Pc_GG13-Reducing_stomach_acid2.txt;miSeqRuns_UMCG-IBD-TIFN_Taxman_100Pc_GG13-ZICPPI.txt	1828	1127	Increased	0.951056	0.341576	0.40066	0.000249072	0.000431869	0.000288784	0.000427509	0.000153833	0.000452944	0.000180774	0.000415536	0.000297547	1	1280	130	162	65	127	36	991	29	17.8935	0.295842
PPI	Increased	k__Bacteria|p__Firmicutes|c__Erysipelotrichi|o__Erysipelotrichales|f__Erysipelotrichaceae	0.0301797811747322;0.00133541523894175;-0.00112193588169235	345;1174;309	345;1173;307	0.0437563288145447;0.896924055142506;0.940256324118705	0.391922715506353;0.990483578093088;0.975098680778196	2.016417579216092;0.1295479889580218;-0.07494770002599725	miSeqRuns_UMCG-IBD-TIFN_Taxman_100Pc_GG13-PPI.txt;miSeqRuns_UMCG-IBD-TIFN_Taxman_100Pc_GG13-Reducing_stomach_acid2.txt;miSeqRuns_UMCG-IBD-TIFN_Taxman_100Pc_GG13-ZICPPI.txt	1828	1825	Increased	0.949	0.34262	0.40066	0.0428099	0.0460515	0.0442882	0.046504	0.037578	0.0401191	0.0416739	0.0521523	0	0	2130	210	289	99	239	60	1602	51	37.2596	0.203138
PPI	Decreased	k__Bacteria|p__Actinobacteria|c__Actinobacteria|o__Actinomycetales|f__Brevibacteriaceae|g__Brevibacterium	7.05853680672868E-7;-5.79254918653965E-5;-5.8195547686087E-5	345;1174;309	2;14;3	0.994927888726154;0.460746722262691;0.384134681449888	0.999808023053732;0.857140945822134;0.792825113551353	0.006356991581049081;-0.7376178220550292;-0.8703032900331654	miSeqRuns_UMCG-IBD-TIFN_Taxman_100Pc_GG13-PPI.txt;miSeqRuns_UMCG-IBD-TIFN_Taxman_100Pc_GG13-Reducing_stomach_acid2.txt;miSeqRuns_UMCG-IBD-TIFN_Taxman_100Pc_GG13-ZICPPI.txt	1828	19	Decreased	-0.946178	0.344058	0.400725	5.09102e-07	6.2381e-08	5.73611e-07	1.32323e-07	2.4834e-07	0	4.86599e-07	0	0.00421781	1	21	1	1	1	3	0	17	0	0	0.816158
PPI	Decreased	k__Bacteria|p__Proteobacteria|c__Gammaproteobacteria|o__Pseudomonadales|f__Pseudomonadaceae	-2.25429819137812E-4;-5.06909753762245E-4;-2.98706862664423E-5	345;1174;309	22;97;54	0.254590679203117;0.619595277416688;0.921852021079309	0.7607242641153;0.956365827304757;0.96664934444688	-1.139269707053348;-0.49642402592490864;-0.09810109116984224	miSeqRuns_UMCG-IBD-TIFN_Taxman_100Pc_GG13-PPI.txt;miSeqRuns_UMCG-IBD-TIFN_Taxman_100Pc_GG13-Reducing_stomach_acid2.txt;miSeqRuns_UMCG-IBD-TIFN_Taxman_100Pc_GG13-ZICPPI.txt	1828	173	Decreased	-0.933099	0.350769	0.405301	6.49627e-05	1.48858e-05	9.45087e-05	6.11689e-06	8.7732e-06	4.1933e-05	1.91697e-06	8.7451e-08	0	0	217	19	21	8	43	10	153	1	0	0.710589
PPI	Decreased	k__Bacteria|p__Proteobacteria|c__Gammaproteobacteria|o__Pseudomonadales|f__Pseudomonadaceae|g__Pseudomonas	-2.25429819137812E-4;-5.05379072365213E-4;-3.09875047012195E-5	345;1174;309	22;97;54	0.254590679203117;0.620636760714681;0.919615795874232	0.7607242641153;0.956365827304757;0.965958639130886	-1.139269707053348;-0.49494809385622585;-0.10091769546199592	miSeqRuns_UMCG-IBD-TIFN_Taxman_100Pc_GG13-PPI.txt;miSeqRuns_UMCG-IBD-TIFN_Taxman_100Pc_GG13-Reducing_stomach_acid2.txt;miSeqRuns_UMCG-IBD-TIFN_Taxman_100Pc_GG13-ZICPPI.txt	1828	173	Decreased	-0.933075	0.350781	0.405301	6.49171e-05	1.48858e-05	9.44981e-05	6.11689e-06	8.51617e-06	4.1933e-05	1.91697e-06	8.7451e-08	0	0	217	19	21	8	43	10	153	1	0	0.710893
PPI	Increased	k__Bacteria|p__Actinobacteria|c__Actinobacteria|o__Bifidobacteriales|f__Bifidobacteriaceae|g__Bifidobacterium|s__bifidum	0.0111834502505294;-6.13139836868341E-4;-0.00122240586992579	345;1174;309	144;493;171	0.00480806924934895;0.817354738771267;0.779488474603147	0.133320267419309;0.990483578093088;0.923076899057239	2.8196190475240583;-0.23094859360092104;-0.27998570188627286	miSeqRuns_UMCG-IBD-TIFN_Taxman_100Pc_GG13-PPI.txt;miSeqRuns_UMCG-IBD-TIFN_Taxman_100Pc_GG13-Reducing_stomach_acid2.txt;miSeqRuns_UMCG-IBD-TIFN_Taxman_100Pc_GG13-ZICPPI.txt	1828	808	Increased	0.924737	0.355103	0.408665	0.00108796	0.00109265	0.000942661	0.000751872	0.00166651	0.00120722	0.00114595	0.00161936	3.48982e-06	0	973	88	118	36	140	28	715	24	72.3254	0.0269595
PPI	Decreased	k__Bacteria|p__Firmicutes|c__Bacilli|o__Lactobacillales|f__Streptococcaceae|[g__Streptococcus/g__Lactococcus]	1.70767164806192E-5;-1.65797351592167E-4;-4.44453592547052E-4	345;1174;309	50;190;33	0.968964485808929;0.640026040045493;0.174079206428635	0.994596915079819;0.96528517515058;0.640390969695442	0.03890706245536218;-0.4676623910797068;-1.3592126735574441	miSeqRuns_UMCG-IBD-TIFN_Taxman_100Pc_GG13-PPI.txt;miSeqRuns_UMCG-IBD-TIFN_Taxman_100Pc_GG13-Reducing_stomach_acid2.txt;miSeqRuns_UMCG-IBD-TIFN_Taxman_100Pc_GG13-ZICPPI.txt	1828	273	Decreased	-0.916708	0.359296	0.411857	1.20167e-05	4.66842e-06	1.2713e-05	7.14817e-06	1.14847e-05	2.245e-06	9.87038e-06	2.70588e-06	7.87804e-05	1	324	22	44	14	30	3	250	5	0	0.541364
PPI	Decreased	k__Bacteria|p__Bacteroidetes|c__Bacteroidia|o__Bacteroidales|f__Rikenellaceae|g__Alistipes	-0.0111338277950798;0.00380409805946328;-0.0162085642913458	345;1174;309	313;1112;247	0.0258189662459007;0.248659136858609;0.0348402853297162	0.301481903998323;0.676860412906463;0.398373776827212	-2.228923935454902;1.1536123401863194;-2.1102098401459095	miSeqRuns_UMCG-IBD-TIFN_Taxman_100Pc_GG13-PPI.txt;miSeqRuns_UMCG-IBD-TIFN_Taxman_100Pc_GG13-Reducing_stomach_acid2.txt;miSeqRuns_UMCG-IBD-TIFN_Taxman_100Pc_GG13-ZICPPI.txt	1828	1672	Decreased	-0.911412	0.362078	0.41213	0.00360064	0.00274481	0.00314956	0.00295183	0.00571036	0.00306947	0.00351921	0.00196101	0.00012899	0	1941	180	267	93	194	46	1480	41	79.8412	0.00700859
PPI	Decreased	k__Bacteria|p__Actinobacteria|c__Actinobacteria|o__Actinomycetales|f__Microbacteriaceae	4.50399055118142E-5;-1.58499880049922E-4;-2.02563434325353E-5	345;1174;309	7;42;3	0.679162686634977;0.215899221877531;0.815575052499741	0.956454791693469;0.636402124884824;0.933577517378063	0.4136059887451893;-1.2375061787903783;-0.23323999257532255	miSeqRuns_UMCG-IBD-TIFN_Taxman_100Pc_GG13-PPI.txt;miSeqRuns_UMCG-IBD-TIFN_Taxman_100Pc_GG13-Reducing_stomach_acid2.txt;miSeqRuns_UMCG-IBD-TIFN_Taxman_100Pc_GG13-ZICPPI.txt	1828	52	Decreased	-0.907941	0.36391	0.41213	1.18655e-06	1.94286e-07	1.58252e-06	1.09091e-07	4.461e-07	0	3.31142e-07	5.88235e-07	0.000238933	1	57	2	5	1	3	0	49	1	0	0.627339
PPI	Decreased	k__Bacteria|p__Bacteroidetes|c__Bacteroidia|o__Bacteroidales|f__Paraprevotellaceae	-0.00236437100876127;-0.00419427510689791;0.00108850709842064	345;1174;309	173;696;94	0.72073809216169;0.294069484483981;0.827431962645052	0.970621719136335;0.721336966195769;0.937046607051444	-0.35747252360561715;-1.049236063183057;0.2179963405982045	miSeqRuns_UMCG-IBD-TIFN_Taxman_100Pc_GG13-PPI.txt;miSeqRuns_UMCG-IBD-TIFN_Taxman_100Pc_GG13-Reducing_stomach_acid2.txt;miSeqRuns_UMCG-IBD-TIFN_Taxman_100Pc_GG13-ZICPPI.txt	1828	963	Decreased	-0.906521	0.36466	0.41213	0.00274153	0.00221973	0.00253645	0.00233094	0.00327895	0.00168382	0.00305624	0.00263432	0.00370964	1	1078	97	143	50	73	20	862	27	0	0.796752
PPI	Increased	k__Bacteria|p__Firmicutes|c__Clostridia|o__Clostridiales|f__Tissierellaceae|g__Peptoniphilus	5.75188721895509E-4;2.48049800339787E-4;-1.13902020187994E-4	345;1174;309	99;429;143	0.219483464445118;0.59825629718633;0.902752710854281	0.72405301043252;0.946540536440028;0.95929696237718	1.2279027836284744;0.5269097004550203;-0.12218474096031531	miSeqRuns_UMCG-IBD-TIFN_Taxman_100Pc_GG13-PPI.txt;miSeqRuns_UMCG-IBD-TIFN_Taxman_100Pc_GG13-Reducing_stomach_acid2.txt;miSeqRuns_UMCG-IBD-TIFN_Taxman_100Pc_GG13-ZICPPI.txt	1828	671	Increased	0.905467	0.365218	0.41213	8.79906e-05	6.54796e-05	4.82737e-05	4.83821e-05	0.000349805	0.000129463	1.73969e-05	2.33938e-05	0	0	775	82	82	36	109	30	584	16	0	0.612492
PPI	Increased	k__Bacteria|p__Actinobacteria|c__Actinobacteria|o__Actinomycetales|f__Nocardiaceae|g__Rhodococcus	6.96421456398278E-5;-2.05259105942203E-5;1.3224388323643E-4	345;1174;309	10;8;1	0.519094557446733;0.722742862828079;0.0283876289105418	0.918343088353565;0.981222930219696;0.38527629948432	0.6447417474748504;-0.3547954159226626;2.1918875272796345	miSeqRuns_UMCG-IBD-TIFN_Taxman_100Pc_GG13-PPI.txt;miSeqRuns_UMCG-IBD-TIFN_Taxman_100Pc_GG13-Reducing_stomach_acid2.txt;miSeqRuns_UMCG-IBD-TIFN_Taxman_100Pc_GG13-ZICPPI.txt	1828	19	Increased	0.896941	0.36975	0.41539	2.8786e-07	4.18571e-07	3.15671e-07	0	0	8.13333e-07	4.24464e-07	7.66667e-07	1.24802e-05	1	26	2	9	0	0	1	17	1	55.9611	0.103238
PPI	Decreased	k__Bacteria|p__Bacteroidetes|c__Bacteroidia|o__Bacteroidales|f__Bacteroidaceae|g__Bacteroides|s__uniformis	-0.00438491954414478;5.45872980486461E-4;-0.00325868947871518	345;1174;309	273;952;236	0.0775716257162031;0.715244925840747;0.306708304357098	0.499182988529336;0.980533652313046;0.763812466731242	-1.76495323432089;0.3648211371235202;-1.0221533959194176	miSeqRuns_UMCG-IBD-TIFN_Taxman_100Pc_GG13-PPI.txt;miSeqRuns_UMCG-IBD-TIFN_Taxman_100Pc_GG13-Reducing_stomach_acid2.txt;miSeqRuns_UMCG-IBD-TIFN_Taxman_100Pc_GG13-ZICPPI.txt	1828	1461	Decreased	-0.894636	0.370982	0.41539	0.000591943	0.000839302	0.000489603	0.000588077	0.000952487	0.00142805	0.000671959	0.000634326	1.44376e-06	0	1713	160	235	81	186	44	1292	35	42.7357	0.17442
PPI	Increased	k__Bacteria|p__Proteobacteria|c__Gammaproteobacteria|o__Enterobacteriales|f__Enterobacteriaceae|g__Shigella	-3.6698055008655E-4;6.09605438920687E-4;-1.32333935799078E-4	345;1174;309	53;188;97	0.472470399799296;0.109025569443786;0.84533636818068	0.893398574165942;0.459405452923435;0.945758107012719	-0.7184653588907028;1.6025883412298279;-0.1950722734310517	miSeqRuns_UMCG-IBD-TIFN_Taxman_100Pc_GG13-PPI.txt;miSeqRuns_UMCG-IBD-TIFN_Taxman_100Pc_GG13-Reducing_stomach_acid2.txt;miSeqRuns_UMCG-IBD-TIFN_Taxman_100Pc_GG13-ZICPPI.txt	1828	338	Increased	0.891978	0.372405	0.41539	1.6638e-05	5.16681e-05	1.14032e-05	4.1629e-05	4.597e-05	0.000103392	1.16494e-05	1.03046e-05	0	0	414	40	47	14	73	21	294	5	14.0491	0.312405
PPI	Increased	k__Bacteria|p__Actinobacteria|c__Actinobacteria|o__Actinomycetales|f__Nocardiaceae	6.96421456398278E-5;-2.19937856496066E-5;1.3224388323643E-4	345;1174;309	10;9;1	0.519094557446733;0.71028486664528;0.0283876289105418	0.918343088353565;0.980533652313046;0.38527629948432	0.6447417474748504;-0.3714735315353147;2.1918875272796345	miSeqRuns_UMCG-IBD-TIFN_Taxman_100Pc_GG13-PPI.txt;miSeqRuns_UMCG-IBD-TIFN_Taxman_100Pc_GG13-Reducing_stomach_acid2.txt;miSeqRuns_UMCG-IBD-TIFN_Taxman_100Pc_GG13-ZICPPI.txt	1828	20	Increased	0.883575	0.376926	0.418822	2.98141e-07	4.18571e-07	3.3102e-07	0	0	8.13333e-07	4.24464e-07	7.66667e-07	1.31753e-05	1	27	2	9	0	0	1	18	1	56.3066	0.101401
PPI	Increased	k__Bacteria|p__Proteobacteria|c__Alphaproteobacteria|o__Rhizobiales	2.00281931516141E-4;1.85437838993208E-5;8.46028283712554E-5	345;1174;309	16;21;6	0.326157155860035;0.803490503139899;0.541306143501113	0.818523457013772;0.990483578093088;0.843389593796883	0.981883681707395;0.24883230236509543;0.6108390424312716	miSeqRuns_UMCG-IBD-TIFN_Taxman_100Pc_GG13-PPI.txt;miSeqRuns_UMCG-IBD-TIFN_Taxman_100Pc_GG13-Reducing_stomach_acid2.txt;miSeqRuns_UMCG-IBD-TIFN_Taxman_100Pc_GG13-ZICPPI.txt	1828	43	Increased	0.877115	0.380424	0.421096	6.42548e-07	1.79792e-06	4.89805e-07	4.26263e-07	5.70539e-07	2.0113e-06	1.27076e-06	4.20951e-06	0	0	55	6	13	2	5	1	37	3	0	0.72986
PPI	Decreased	k__Bacteria|p__Bacteroidetes|c__Bacteroidia|o__Bacteroidales|f__Barnesiellaceae|g__Barnesiella|s__intestinihominis	-0.00103137049476648;3.55080029440593E-4;-0.00376996974614369	345;1174;309	111;336;77	0.0272498076441604;0.342189040785498;0.107934726044997	0.309317581029029;0.78667059445736;0.561737519988038	-2.2079206131093105;0.9498488881712872;-1.6075456396448233	miSeqRuns_UMCG-IBD-TIFN_Taxman_100Pc_GG13-PPI.txt;miSeqRuns_UMCG-IBD-TIFN_Taxman_100Pc_GG13-Reducing_stomach_acid2.txt;miSeqRuns_UMCG-IBD-TIFN_Taxman_100Pc_GG13-ZICPPI.txt	1828	524	Decreased	-0.858916	0.390387	0.430481	0.00017015	0.000131493	0.000124859	0.000232254	0.000324975	3.53149e-05	0.000209509	4.9048e-05	0	0	634	51	100	30	64	12	470	9	73.7656	0.0221084
PPI	Decreased	k__Bacteria|p__Firmicutes|c__Clostridia|o__Clostridiales|f__Veillonellaceae|g__Mitsuokella	-7.62961683044599E-4;-7.28497086403207E-4;-0.00269846455140768	345;1174;309	42;151;18	0.749773700736606;0.651564364906503;0.391731416047451	0.978784077949042;0.967871433413119;0.794581412580789	-0.3189377722781737;-0.45159001452445274;-0.8564816545069165	miSeqRuns_UMCG-IBD-TIFN_Taxman_100Pc_GG13-PPI.txt;miSeqRuns_UMCG-IBD-TIFN_Taxman_100Pc_GG13-Reducing_stomach_acid2.txt;miSeqRuns_UMCG-IBD-TIFN_Taxman_100Pc_GG13-ZICPPI.txt	1828	211	Decreased	-0.852593	0.393885	0.432693	0.000291357	0.000152559	0.000245575	0.000196382	0.000541745	5.89515e-05	0.00025285	0.000177616	0	0	255	12	39	8	17	1	199	3	0	0.855431
PPI	Increased	k__Bacteria|p__Firmicutes|c__Bacilli|o__Bacillales|f__Bacillaceae|g__Bacillus|s__clausii	-4.65100298512207E-5;1.07343088577572E-4;1.77728286559792E-4	345;1174;309	9;54;16	0.750336500156454;0.426820909039655;0.393250284980159	0.978807199921599;0.833923224843397;0.796451235066092	-0.3181956922818395;0.7946434962827165;0.8537377999774447	miSeqRuns_UMCG-IBD-TIFN_Taxman_100Pc_GG13-PPI.txt;miSeqRuns_UMCG-IBD-TIFN_Taxman_100Pc_GG13-Reducing_stomach_acid2.txt;miSeqRuns_UMCG-IBD-TIFN_Taxman_100Pc_GG13-ZICPPI.txt	1828	79	Increased	0.849595	0.39555	0.432838	1.44417e-06	2.27677e-06	1.58953e-06	2.04687e-06	1.4578e-06	4.03968e-06	8.92076e-07	6.4902e-07	0	0	88	10	8	6	12	3	68	1	0	0.690816
PPI	Decreased	k__Bacteria|p__Verrucomicrobia	-0.00369362309981863;0.00149007359952248;-0.0131283244077877	345;1174;309	277;945;137	0.767539921549585;0.868910511287816;0.0385038315330724	0.980620380595767;0.990483578093088;0.416465767014475	-0.2955943073443163;0.1650425244766558;-2.069450502906826	miSeqRuns_UMCG-IBD-TIFN_Taxman_100Pc_GG13-PPI.txt;miSeqRuns_UMCG-IBD-TIFN_Taxman_100Pc_GG13-Reducing_stomach_acid2.txt;miSeqRuns_UMCG-IBD-TIFN_Taxman_100Pc_GG13-ZICPPI.txt	1828	1359	Decreased	-0.846988	0.397002	0.432838	0.0122427	0.0128988	0.0135221	0.0164426	0.00566109	0.00880486	0.0129725	0.0108361	0	0	1564	135	237	75	110	23	1217	37	45.65	0.158829
PPI	Decreased	k__Bacteria|p__Verrucomicrobia|c__Verrucomicrobiae|o__Verrucomicrobiales|f__Verrucomicrobiaceae|g__Akkermansia	-0.00337893224967051;0.00148652460961425;-0.0131283244077877	345;1174;309	277;945;137	0.786928651244714;0.869217682914317;0.0385038315330724	0.985022355310484;0.990483578093088;0.416465767014475	-0.2703010583026644;0.16465227534792357;-2.069450502906826	miSeqRuns_UMCG-IBD-TIFN_Taxman_100Pc_GG13-PPI.txt;miSeqRuns_UMCG-IBD-TIFN_Taxman_100Pc_GG13-Reducing_stomach_acid2.txt;miSeqRuns_UMCG-IBD-TIFN_Taxman_100Pc_GG13-ZICPPI.txt	1828	1359	Decreased	-0.836313	0.402979	0.43379	0.0122402	0.0128981	0.0135217	0.0164411	0.00566109	0.00880486	0.0129594	0.0108361	0	0	1564	135	237	75	110	23	1217	37	45.702	0.158549
PPI	Decreased	k__Bacteria|p__Verrucomicrobia|c__Verrucomicrobiae|o__Verrucomicrobiales|f__Verrucomicrobiaceae	-0.0033789322496705;0.00148652460961426;-0.0131283244077877	345;1174;309	277;945;137	0.786928651244714;0.869217682914317;0.0385038315330724	0.985022355310484;0.990483578093088;0.416465767014475	-0.2703010583026644;0.16465227534792357;-2.069450502906826	miSeqRuns_UMCG-IBD-TIFN_Taxman_100Pc_GG13-PPI.txt;miSeqRuns_UMCG-IBD-TIFN_Taxman_100Pc_GG13-Reducing_stomach_acid2.txt;miSeqRuns_UMCG-IBD-TIFN_Taxman_100Pc_GG13-ZICPPI.txt	1828	1359	Decreased	-0.836313	0.402979	0.43379	0.0122402	0.0128981	0.0135217	0.0164411	0.00566109	0.00880486	0.0129594	0.0108361	0	0	1564	135	237	75	110	23	1217	37	45.702	0.158549
PPI	Increased	k__Bacteria|p__Firmicutes|c__Erysipelotrichi|o__Erysipelotrichales|f__Erysipelotrichaceae|g__Eubacterium|s__biforme	0.00693209899279269;0.00959782199203704;-8.27702441625346E-4	345;1174;309	219;776;105	0.672949596593592;0.398567167007652;0.95150510884599	0.955415448483902;0.821951716767961;0.98042509017656	0.4221033311614197;0.8441829743237746;-0.06081680223012643	miSeqRuns_UMCG-IBD-TIFN_Taxman_100Pc_GG13-PPI.txt;miSeqRuns_UMCG-IBD-TIFN_Taxman_100Pc_GG13-Reducing_stomach_acid2.txt;miSeqRuns_UMCG-IBD-TIFN_Taxman_100Pc_GG13-ZICPPI.txt	1828	1100	Increased	0.834894	0.403778	0.43379	0.0157695	0.0165808	0.017112	0.0211544	0.00971107	0.00761209	0.0158279	0.0182539	0	0	1234	121	183	68	80	22	971	31	0	0.905984
PPI	Decreased	k__Bacteria|p__Verrucomicrobia|c__Verrucomicrobiae|o__Verrucomicrobiales|f__Verrucomicrobiaceae|g__Akkermansia|s__muciniphila	-0.00328161434439324;0.00148529610563155;-0.0131283244077877	345;1174;309	276;945;137	0.793033062023241;0.869333834225808;0.0385038315330724	0.987729801801402;0.990483578093088;0.416465767014475	-0.2623740696493608;0.16450471634071057;-2.069450502906826	miSeqRuns_UMCG-IBD-TIFN_Taxman_100Pc_GG13-PPI.txt;miSeqRuns_UMCG-IBD-TIFN_Taxman_100Pc_GG13-Reducing_stomach_acid2.txt;miSeqRuns_UMCG-IBD-TIFN_Taxman_100Pc_GG13-ZICPPI.txt	1828	1358	Decreased	-0.832987	0.404852	0.43379	0.0122398	0.0128981	0.0135216	0.0164411	0.00566109	0.00880486	0.0129577	0.0108361	0	0	1562	135	236	75	110	23	1216	37	45.7209	0.158448
PPI	Increased	k__Bacteria|p__Firmicutes|c__Bacilli|o__Lactobacillales|f__Lactobacillaceae|g__Pediococcus|s__acidilactici	8.58561360442972E-5;2.62337616530785E-4;-0.0011323099291978	345;1174;309	10;28;26	0.882214463828013;0.244570930094969;0.688538721256239	0.991109715557945;0.67083104820369;0.895848964316777	0.1481625785166294;1.1636375432260844;-0.4008389212022809	miSeqRuns_UMCG-IBD-TIFN_Taxman_100Pc_GG13-PPI.txt;miSeqRuns_UMCG-IBD-TIFN_Taxman_100Pc_GG13-Reducing_stomach_acid2.txt;miSeqRuns_UMCG-IBD-TIFN_Taxman_100Pc_GG13-ZICPPI.txt	1828	64	Increased	0.832097	0.405354	0.43379	6.1167e-05	2.25538e-05	4.09205e-06	7.67724e-06	0.000370619	6.39492e-05	1.5415e-05	2.73137e-06	0	0	80	11	7	4	21	4	52	3	0	0.655639
PPI	Increased	k__Bacteria|p__Firmicutes|c__Clostridia|o__Clostridiales|f__Tissierellaceae	2.67531734402022E-4;0.00105157335041434;-0.00111076121852339	345;1174;309	219;802;218	0.747681862113577;0.191422287210918;0.381800319496798	0.977416512483671;0.6047585695708;0.792529113982617	0.3216975130075996;1.3063831672448103;-0.8745839580403024	miSeqRuns_UMCG-IBD-TIFN_Taxman_100Pc_GG13-PPI.txt;miSeqRuns_UMCG-IBD-TIFN_Taxman_100Pc_GG13-Reducing_stomach_acid2.txt;miSeqRuns_UMCG-IBD-TIFN_Taxman_100Pc_GG13-ZICPPI.txt	1828	1239	Increased	0.827105	0.408177	0.435206	0.000323484	0.000288114	0.000192558	0.000167306	0.00120761	0.000662622	7.32092e-05	8.20257e-05	0	0	1461	132	186	65	176	36	1099	31	0	0.388501
PPI	Decreased	k__Bacteria|p__Firmicutes|c__Clostridia|o__Clostridiales|f__Lachnospiraceae|g__Clostridium|s__hathewayi	-1.04636739811286E-4;-5.42712627493281E-7;-1.09891364677988E-4	345;1174;309	6;14;3	0.402570420209308;0.993529583852737;0.274998219566935	0.858977595384385;0.998380981487454;0.745120429727065	-0.837039402601368;-0.008109552918055533;-1.0916244164251327	miSeqRuns_UMCG-IBD-TIFN_Taxman_100Pc_GG13-PPI.txt;miSeqRuns_UMCG-IBD-TIFN_Taxman_100Pc_GG13-Reducing_stomach_acid2.txt;miSeqRuns_UMCG-IBD-TIFN_Taxman_100Pc_GG13-ZICPPI.txt	1828	23	Decreased	-0.818947	0.412816	0.437766	4.97472e-07	5.14286e-08	4.17621e-07	1.09091e-07	5.70124e-07	0	7.3391e-07	0	0	0	31	1	6	1	3	0	22	0	0	0.542897
PPI	Decreased	k__Bacteria|p__Proteobacteria|c__Alphaproteobacteria|o__Rickettsiales|f__mitochondria|[g__Zea/g__Oryza]	-6.27621471046802E-5;-1.40073465048291E-4;1.91290212674324E-4	345;1174;309	6;35;15	0.554263832923705;0.270272470970163;0.43234520837783	0.928384473225302;0.698239020166288;0.807771019574266	-0.5913829930577633;-1.102435302535579;0.7851848301741784	miSeqRuns_UMCG-IBD-TIFN_Taxman_100Pc_GG13-PPI.txt;miSeqRuns_UMCG-IBD-TIFN_Taxman_100Pc_GG13-Reducing_stomach_acid2.txt;miSeqRuns_UMCG-IBD-TIFN_Taxman_100Pc_GG13-ZICPPI.txt	1828	56	Decreased	-0.817578	0.413598	0.437766	2.02514e-06	1.27075e-06	1.54188e-06	8.82828e-08	5.9698e-06	4.30195e-06	5.33235e-07	0	0	0	70	5	6	1	12	4	52	0	0	0.469264
PPI	Increased	k__Bacteria|p__Firmicutes|c__Erysipelotrichi|o__Erysipelotrichales|f__Erysipelotrichaceae|g__Eubacterium|s__dolichum	-4.16544247656531E-5;6.83714000232783E-4;0.00320290354982766	345;1174;309	257;700;258	0.982959473759452;0.501231845720649;0.487954088937393	0.998426551751326;0.888693722177082;0.832497190641071	-0.02135875629832682;0.6725527886754702;0.693566531200021	miSeqRuns_UMCG-IBD-TIFN_Taxman_100Pc_GG13-PPI.txt;miSeqRuns_UMCG-IBD-TIFN_Taxman_100Pc_GG13-Reducing_stomach_acid2.txt;miSeqRuns_UMCG-IBD-TIFN_Taxman_100Pc_GG13-ZICPPI.txt	1828	1215	Increased	0.814855	0.415156	0.437817	0.000979708	0.00267973	0.000420224	0.000435386	0.00359851	0.00805863	0.000876988	0.00070827	0	0	1471	149	213	61	203	48	1055	40	0	0.87379
PPI	Decreased	k__Bacteria|p__Proteobacteria|c__Gammaproteobacteria|[o__Pseudomonadales/o__Enterobacteriales]	-2.22958052144415E-6;-8.55628642663776E-4;-2.32665943453438E-4	345;1174;309	1;8;11	0.923234716837461;0.488988969636746;0.614098866171465	0.991109715557945;0.880180145346143;0.865970282740733	-0.09635992795286949;-0.6919177713333351;-0.5042312737734425	miSeqRuns_UMCG-IBD-TIFN_Taxman_100Pc_GG13-PPI.txt;miSeqRuns_UMCG-IBD-TIFN_Taxman_100Pc_GG13-Reducing_stomach_acid2.txt;miSeqRuns_UMCG-IBD-TIFN_Taxman_100Pc_GG13-ZICPPI.txt	1828	20	Decreased	-0.803671	0.421587	0.442989	9.28328e-05	1.33998e-06	0.000136195	2.68687e-07	1.07033e-05	4.2466e-06	2.53287e-08	0	0	0	25	3	1	1	8	2	16	0	0	0.952944
PPI	Increased	k__Bacteria|p__Bacteroidetes|c__Bacteroidia|o__Bacteroidales|f__Prevotellaceae	-0.00550730763013739;0.00707630665905036;9.1864595430976E-4	345;1174;309	246;975;215	0.685414571351758;0.521097576289677;0.271090005359012	0.957891808563263;0.901274647957303;0.744095035997608	-0.40508562665524467;0.6416544412346329;1.1005558598900502	miSeqRuns_UMCG-IBD-TIFN_Taxman_100Pc_GG13-PPI.txt;miSeqRuns_UMCG-IBD-TIFN_Taxman_100Pc_GG13-Reducing_stomach_acid2.txt;miSeqRuns_UMCG-IBD-TIFN_Taxman_100Pc_GG13-ZICPPI.txt	1828	1436	Increased	0.79072	0.429107	0.446051	0.0162245	0.0182124	0.0176782	0.0182151	0.0145684	0.0241332	0.0121984	0.0112414	0.0246277	1	1657	150	215	74	163	47	1279	29	0	0.559395
PPI	Increased	k__Bacteria|p__Bacteroidetes|c__Bacteroidia|o__Bacteroidales|f__Prevotellaceae|g__Prevotella	-0.00551129994796508;0.00702949188402592;9.1864595430976E-4	345;1174;309	246;975;215	0.685193563902607;0.523835465181456;0.271090005359012	0.957891808563263;0.901571128796925;0.744095035997608	-0.40538632147442444;0.637444323379948;1.1005558598900502	miSeqRuns_UMCG-IBD-TIFN_Taxman_100Pc_GG13-PPI.txt;miSeqRuns_UMCG-IBD-TIFN_Taxman_100Pc_GG13-Reducing_stomach_acid2.txt;miSeqRuns_UMCG-IBD-TIFN_Taxman_100Pc_GG13-ZICPPI.txt	1828	1436	Increased	0.787215	0.431156	0.446051	0.0162203	0.0182046	0.017672	0.018199	0.0145684	0.024133	0.0121978	0.0112409	0.0246277	1	1657	150	215	74	163	47	1279	29	0	0.559286
PPI	Increased	k__Bacteria|p__Proteobacteria|c__Gammaproteobacteria|o__Enterobacteriales|f__Enterobacteriaceae|g__Klebsiella	-4.62553681045103E-4;2.4948195179673E-4;0.0052173737786254	345;1174;309	64;131;72	0.855072093310603;0.858619031995628;0.0788155372265358	0.991109715557945;0.990483578093088;0.528791498322557	-0.1826507092796819;0.17813235596145413;1.7576003296590774	miSeqRuns_UMCG-IBD-TIFN_Taxman_100Pc_GG13-PPI.txt;miSeqRuns_UMCG-IBD-TIFN_Taxman_100Pc_GG13-Reducing_stomach_acid2.txt;miSeqRuns_UMCG-IBD-TIFN_Taxman_100Pc_GG13-ZICPPI.txt	1828	267	Increased	0.786027	0.431852	0.446051	0.000217087	0.000405505	0.000182385	8.12597e-05	0.000300572	0.00111257	0.000276549	0.000203081	0	0	312	52	52	21	49	20	211	11	21.1485	0.281336
PPI	Decreased	k__Bacteria|p__Firmicutes|c__Clostridia|o__Clostridiales|f__Peptostreptococcaceae|g__Peptostreptococcus	1.68482193810817E-4;-2.73954089867382E-4;-0.00171596913064052	345;1174;309	83;322;80	0.691809705994951;0.423468448098177;0.441379708736618	0.959309458979665;0.831814215883345;0.814760883009199	0.39640035261835416;-0.8004183581314668;-0.7698654529188972	miSeqRuns_UMCG-IBD-TIFN_Taxman_100Pc_GG13-PPI.txt;miSeqRuns_UMCG-IBD-TIFN_Taxman_100Pc_GG13-Reducing_stomach_acid2.txt;miSeqRuns_UMCG-IBD-TIFN_Taxman_100Pc_GG13-ZICPPI.txt	1828	485	Decreased	-0.785765	0.432005	0.446051	6.14645e-05	2.2404e-05	2.5469e-05	1.4981e-05	0.000282563	4.75686e-05	1.09818e-05	7.20784e-06	0.000174991	1	576	43	72	20	65	13	439	10	0	0.679407
PPI	Decreased	k__Bacteria|p__Actinobacteria|c__Actinobacteria|o__Actinomycetales|f__Micrococcaceae|g__Arthrobacter	7.97434733494946E-6;-9.49427505244752E-5;4.17404189024048E-5	345;1174;309	5;22;4	0.943085779285615;0.180890833412602;0.533802218644343	0.991588822946553;0.586213738025967;0.84332594246358	0.07139199642436429;-1.3380171894233528;0.6222123921157777	miSeqRuns_UMCG-IBD-TIFN_Taxman_100Pc_GG13-PPI.txt;miSeqRuns_UMCG-IBD-TIFN_Taxman_100Pc_GG13-Reducing_stomach_acid2.txt;miSeqRuns_UMCG-IBD-TIFN_Taxman_100Pc_GG13-ZICPPI.txt	1828	31	Decreased	-0.785446	0.432192	0.446051	4.8033e-07	2.21905e-07	4.8e-07	0	4.50332e-07	4.01667e-07	5.06574e-07	4.41176e-07	2.34457e-05	1	38	2	4	0	4	1	30	1	0	0.457122
PPI	Decreased	k__Bacteria|p__Firmicutes|c__Clostridia|o__Clostridiales|f__Peptostreptococcaceae|g__Clostridium	0.00609113134536028;-0.00755157842547738;-0.00643454240843296	345;1174;309	324;1121;286	0.441749338378831;0.283948989806114;0.532804785221684	0.88027235046815;0.708873658973254;0.84332594246358	0.769242544458132;-1.0714903891701342;-0.6237302015794337	miSeqRuns_UMCG-IBD-TIFN_Taxman_100Pc_GG13-PPI.txt;miSeqRuns_UMCG-IBD-TIFN_Taxman_100Pc_GG13-Reducing_stomach_acid2.txt;miSeqRuns_UMCG-IBD-TIFN_Taxman_100Pc_GG13-ZICPPI.txt	1828	1731	Decreased	-0.780944	0.434836	0.447188	0.0101366	0.0101239	0.0108422	0.0107296	0.0117433	0.0125185	0.00617182	0.00613069	7.23169e-05	0	2032	186	274	89	226	52	1532	45	0	0.467902
PPI	Increased	k__Bacteria|p__Proteobacteria|c__Gammaproteobacteria|o__Enterobacteriales|f__Enterobacteriaceae|g__Enterobacter|s__turicensis	2.28876668019442E-5;5.31999180481499E-5;1.86087914154953E-4	345;1174;309	7;17;6	0.916981111230733;0.69136034208835;0.320120680359138	0.991109715557945;0.976275315759913;0.76852007366363	0.10423720276239666;0.397009653276394;0.9942099184356732	miSeqRuns_UMCG-IBD-TIFN_Taxman_100Pc_GG13-PPI.txt;miSeqRuns_UMCG-IBD-TIFN_Taxman_100Pc_GG13-Reducing_stomach_acid2.txt;miSeqRuns_UMCG-IBD-TIFN_Taxman_100Pc_GG13-ZICPPI.txt	1828	30	Increased	0.772206	0.439993	0.448936	1.5909e-06	1.98318e-06	1.61027e-06	9.73535e-07	9.67651e-07	4.09812e-06	2.03857e-06	1.4549e-06	0	0	30	8	5	3	3	3	22	2	0	0.755544
PPI	Decreased	k__Bacteria|p__Firmicutes|c__Clostridia|o__Clostridiales|f__Peptostreptococcaceae|g__Clostridium|s__bartlettii	0.00592959453272907;-0.00755812162074133;-0.0059011662231723	345;1174;309	324;1121;285	0.453136605592423;0.282854508061832;0.568153739076865	0.889539186148404;0.70720744642737;0.849463846267896	0.7501961028994029;-1.0739289921201036;-0.5707726878318169	miSeqRuns_UMCG-IBD-TIFN_Taxman_100Pc_GG13-PPI.txt;miSeqRuns_UMCG-IBD-TIFN_Taxman_100Pc_GG13-Reducing_stomach_acid2.txt;miSeqRuns_UMCG-IBD-TIFN_Taxman_100Pc_GG13-ZICPPI.txt	1828	1730	Decreased	-0.769399	0.441656	0.448936	0.0100973	0.010073	0.0108092	0.0106954	0.0116493	0.0124407	0.00615482	0.0060795	7.19671e-05	0	2030	186	274	89	225	52	1531	45	0	0.484343
PPI	Decreased	k__Bacteria|p__Firmicutes|c__Clostridia|o__Clostridiales|f__Peptococcaceae	-2.35827379648832E-4;-0.00119590050566002;-8.62489508088255E-4	345;1174;309	177;740;118	0.836037911121546;0.662018930346356;0.423469620556356	0.991109715557945;0.970177691035165;0.806298730751268	-0.20696407999916935;-0.4371274370012362;-0.8004163338235575	miSeqRuns_UMCG-IBD-TIFN_Taxman_100Pc_GG13-PPI.txt;miSeqRuns_UMCG-IBD-TIFN_Taxman_100Pc_GG13-Reducing_stomach_acid2.txt;miSeqRuns_UMCG-IBD-TIFN_Taxman_100Pc_GG13-ZICPPI.txt	1828	1035	Decreased	-0.769307	0.441711	0.448936	0.00116951	0.0011775	0.00137742	0.00112715	0.000627454	0.000770833	0.000848158	0.00175368	0.000134467	0	1174	104	153	60	94	22	927	22	0	0.868165
PPI	Increased	k__Bacteria|p__Firmicutes|c__Clostridia|o__Clostridiales|f__Tissierellaceae|g__Parvimonas	-2.65402023456311E-4;5.05466899456482E-4;-2.34856097806284E-4	345;1174;309	117;344;81	0.600016239521019;0.144366608048125;0.665895200429801	0.93661219583517;0.52078865372413;0.884042511000225	-0.5243771595781213;1.4597215816830542;-0.43178841477007224	miSeqRuns_UMCG-IBD-TIFN_Taxman_100Pc_GG13-PPI.txt;miSeqRuns_UMCG-IBD-TIFN_Taxman_100Pc_GG13-Reducing_stomach_acid2.txt;miSeqRuns_UMCG-IBD-TIFN_Taxman_100Pc_GG13-ZICPPI.txt	1828	542	Increased	0.76448	0.444581	0.448936	3.36891e-05	1.73236e-05	2.38561e-05	2.37744e-05	9.37614e-05	1.40349e-05	2.01701e-05	8.67059e-06	0	0	648	59	104	34	65	13	479	12	0.387026	0.366453
PPI	Decreased	k__Bacteria|p__Bacteroidetes|c__Bacteroidia|o__Bacteroidales|f__Odoribacteraceae|g__Butyricimonas	-0.00168853343149985;-4.53283553960708E-5;-7.32102540436452E-4	345;1174;309	189;722;90	0.202855386858797;0.971273156731904;0.659080656998932	0.705204500290218;0.994555003200321;0.883666329889024	-1.273458508623564;-0.036011540755313244;-0.44118280984082003	miSeqRuns_UMCG-IBD-TIFN_Taxman_100Pc_GG13-PPI.txt;miSeqRuns_UMCG-IBD-TIFN_Taxman_100Pc_GG13-Reducing_stomach_acid2.txt;miSeqRuns_UMCG-IBD-TIFN_Taxman_100Pc_GG13-ZICPPI.txt	1828	1001	Decreased	-0.763479	0.445178	0.448936	0.000278759	0.000279816	0.000277475	0.000238591	0.000310371	0.000139872	0.000257173	0.000524481	0	0	1135	96	166	55	68	20	901	21	0	0.539362
PPI	Decreased	k__Bacteria|p__Firmicutes|c__Bacilli|o__Turicibacterales|f__Turicibacteraceae|g__Turicibacter	6.18423983670945E-4;-0.00252578479795935;-0.00449027808967842	345;1174;309	273;1023;209	0.898556711625412;0.578942278728128;0.367021189271867	0.991109715557945;0.936297816402996;0.78889856267915	0.1274847889271747;-0.5549303835196411;-0.9020671662491603	miSeqRuns_UMCG-IBD-TIFN_Taxman_100Pc_GG13-PPI.txt;miSeqRuns_UMCG-IBD-TIFN_Taxman_100Pc_GG13-Reducing_stomach_acid2.txt;miSeqRuns_UMCG-IBD-TIFN_Taxman_100Pc_GG13-ZICPPI.txt	1828	1505	Decreased	-0.760211	0.447128	0.448936	0.00356992	0.00291577	0.00388098	0.00381435	0.00415997	0.00211646	0.0019208	0.00211183	1.23472e-05	0	1756	145	233	73	170	36	1353	36	0	0.755782
PPI	Decreased	k__Bacteria|p__Firmicutes|c__Bacilli|o__Bacillales|f__Bacillaceae|g__Geobacillus	-8.49720734167656E-5;-2.65669317398659E-4;8.02780993031346E-5	345;1174;309	3;54;1	0.661798059160692;0.104182879938847;0.0748431529546427	0.953832450945792;0.44734705923612;0.517309668608774	-0.4374320304095652;-1.624904637393148;1.781424351738397	miSeqRuns_UMCG-IBD-TIFN_Taxman_100Pc_GG13-PPI.txt;miSeqRuns_UMCG-IBD-TIFN_Taxman_100Pc_GG13-Reducing_stomach_acid2.txt;miSeqRuns_UMCG-IBD-TIFN_Taxman_100Pc_GG13-ZICPPI.txt	1828	58	Decreased	-0.759806	0.447371	0.448936	2.0334e-06	2.85714e-07	2.5629e-06	3.27273e-07	0	4.6e-07	1.75946e-06	0	7.94607e-07	0	59	2	3	1	0	1	56	0	63.1529	0.0662768
PPI	Increased	k__Bacteria|p__Bacteroidetes|c__Bacteroidia|o__Bacteroidales|f__Bacteroidaceae|g__Bacteroides|[s__ovatus/s__fragilis]	2.28291818594019E-4;3.18109522266162E-5;-2.12417272727611E-5	345;1174;309	14;30;23	0.218162753741937;0.764038702988655;0.949963027619882	0.72405301043252;0.988475071991572;0.980085598487952	1.2314282040725009;0.3001815165539358;-0.06275320721089193	miSeqRuns_UMCG-IBD-TIFN_Taxman_100Pc_GG13-PPI.txt;miSeqRuns_UMCG-IBD-TIFN_Taxman_100Pc_GG13-Reducing_stomach_acid2.txt;miSeqRuns_UMCG-IBD-TIFN_Taxman_100Pc_GG13-ZICPPI.txt	1828	67	Increased	0.749735	0.453415	0.453432	1.4936e-06	3.52347e-06	9.65226e-07	1.23966e-06	4.458e-06	6.82885e-06	9.8699e-07	4.06806e-06	0	0	85	7	12	1	16	4	57	2	0	0.592041
PPI	Decreased	k__Bacteria|p__Proteobacteria|c__Alphaproteobacteria|o__Rickettsiales|f__mitochondria|g__Nicotiana|s__tabacum	8.23570914346588E-5;-8.50858544702797E-5;-6.66738042903662E-4	345;1174;309	4;46;13	0.287393778087018;0.58305693432069;0.0613656798319428	0.792343376404856;0.937709638047118;0.49613222361098	1.0638563531532501;-0.5489249802098436;-1.8708514076981544	miSeqRuns_UMCG-IBD-TIFN_Taxman_100Pc_GG13-PPI.txt;miSeqRuns_UMCG-IBD-TIFN_Taxman_100Pc_GG13-Reducing_stomach_acid2.txt;miSeqRuns_UMCG-IBD-TIFN_Taxman_100Pc_GG13-ZICPPI.txt	1828	63	Decreased	-0.746917	0.455114	0.453567	2.58043e-06	1.01925e-06	2.17021e-06	1.71155e-06	7.34446e-06	0	1.33599e-07	8.7451e-07	0	0	75	4	3	3	13	0	59	1	54.2889	0.11218
PPI	Increased	k__Bacteria|p__Proteobacteria|c__Gammaproteobacteria|o__Enterobacteriales|f__Enterobacteriaceae|[g__Klebsiella/g__Pantoea]	-1.84553658655548E-4;4.85497578237948E-5;5.35347167966427E-4	345;1174;309	3;9;10	0.249335747269811;0.529887141777287;0.0737371909420949	0.754835259553063;0.902289575557436;0.516732859404705	-1.1519642912414239;0.6281783034890516;1.788240647652906	miSeqRuns_UMCG-IBD-TIFN_Taxman_100Pc_GG13-PPI.txt;miSeqRuns_UMCG-IBD-TIFN_Taxman_100Pc_GG13-Reducing_stomach_acid2.txt;miSeqRuns_UMCG-IBD-TIFN_Taxman_100Pc_GG13-ZICPPI.txt	1828	22	Increased	0.738188	0.4604	0.457264	1.11064e-06	4.39955e-06	4.97714e-07	7.12626e-07	3.71498e-06	1.42226e-05	1.2188e-06	0	0	0	25	6	3	2	6	4	16	0	54.2806	0.112224
PPI	Decreased	k__Bacteria|p__Firmicutes|c__Clostridia|o__Clostridiales|f__Christensenellaceae|g__Christensenella	-9.64522773375387E-4;-8.17154116074854E-5;-4.34870217609199E-5	345;1174;309	162;505;51	0.20661491597964;0.857482729212255;0.924381892147742	0.705288684618714;0.990483578093088;0.966904425607754	-1.2629283902199107;-0.17957946235896935;-0.09491556639274583	miSeqRuns_UMCG-IBD-TIFN_Taxman_100Pc_GG13-PPI.txt;miSeqRuns_UMCG-IBD-TIFN_Taxman_100Pc_GG13-Reducing_stomach_acid2.txt;miSeqRuns_UMCG-IBD-TIFN_Taxman_100Pc_GG13-ZICPPI.txt	1828	718	Decreased	-0.731594	0.464417	0.459679	2.9395e-05	2.36037e-05	3.05845e-05	2.94385e-05	1.09533e-05	8.49983e-06	4.0349e-05	3.00465e-05	0	0	827	69	143	40	38	12	646	17	0	0.576657
PPI	Increased	k__Bacteria|p__Firmicutes|c__Erysipelotrichi|o__Erysipelotrichales|f__Erysipelotrichaceae|g__Bulleidia	-8.28167445218604E-4;4.87569389426923E-4;6.22931114823558E-4	345;1174;309	187;642;125	0.213550847012155;0.315483190839114;0.263034516878425	0.717351079230576;0.751712466229602;0.733053019879844	-1.2438606688985532;1.0037830609370613;1.1192476158519626	miSeqRuns_UMCG-IBD-TIFN_Taxman_100Pc_GG13-PPI.txt;miSeqRuns_UMCG-IBD-TIFN_Taxman_100Pc_GG13-Reducing_stomach_acid2.txt;miSeqRuns_UMCG-IBD-TIFN_Taxman_100Pc_GG13-ZICPPI.txt	1828	954	Increased	0.724222	0.468929	0.462567	0.000866745	0.000751232	0.0008371	0.000590329	0.000761788	0.000608052	0.00106454	0.00123202	0	0	1110	99	161	52	99	24	850	23	39.0799	0.19369
PPI	Decreased	k__Bacteria|p__Firmicutes|c__Bacilli|o__Lactobacillales|f__Lactobacillaceae|g__Lactobacillus|s__iners	-1.090366152558E-4;-1.05671518175996E-4;3.8504361138144E-4	345;1174;309	6;30;16	0.426629353446065;0.403625120710648;0.471587275832711	0.869629952506614;0.822752315620331;0.822943763018126	-0.7949727502543301;-0.835164453608115;0.7198988504929548	miSeqRuns_UMCG-IBD-TIFN_Taxman_100Pc_GG13-PPI.txt;miSeqRuns_UMCG-IBD-TIFN_Taxman_100Pc_GG13-Reducing_stomach_acid2.txt;miSeqRuns_UMCG-IBD-TIFN_Taxman_100Pc_GG13-ZICPPI.txt	1828	52	Decreased	-0.718677	0.47234	0.464352	3.05026e-06	4.45423e-06	1.53343e-06	2.05556e-07	1.27071e-05	1.52506e-05	6.39446e-07	0	0.000121946	1	62	6	5	2	12	4	45	0	0	0.513955
PPI	Increased	k__Bacteria|p__Proteobacteria|c__Gammaproteobacteria|o__Enterobacteriales|f__Enterobacteriaceae|[g__Klebsiella/g__Enterobacter]	-4.54929208832993E-4;2.77512939285363E-5;0.00211229925374072	345;1174;309	21;42;23	0.556476187796292;0.941691027218776;0.0284850906969266	0.928462951801346;0.992437474733823;0.38527629948432	-0.5880835891200346;0.07314462990719944;2.1905400891209563	miSeqRuns_UMCG-IBD-TIFN_Taxman_100Pc_GG13-PPI.txt;miSeqRuns_UMCG-IBD-TIFN_Taxman_100Pc_GG13-Reducing_stomach_acid2.txt;miSeqRuns_UMCG-IBD-TIFN_Taxman_100Pc_GG13-ZICPPI.txt	1828	86	Increased	0.703757	0.481584	0.471075	1.63931e-05	4.44049e-05	1.30696e-05	8.00392e-06	1.82269e-05	0.000136518	2.72265e-05	6.69749e-06	0	0	96	18	16	6	14	7	66	5	57.0298	0.0975693
PPI	Decreased	k__Bacteria|p__Firmicutes|c__Clostridia|o__Clostridiales|f__Lachnospiraceae|g__Butyrivibrio	-2.15166687292502E-4;2.72877985319923E-5;-0.00260144252554438	345;1174;309	107;279;22	0.509109948828476;0.990343095723204;0.301349212597881	0.911832980986189;0.998380981487454;0.763024416155338	-0.660224224671478;0.012103430157660048;-1.0335443806419815	miSeqRuns_UMCG-IBD-TIFN_Taxman_100Pc_GG13-PPI.txt;miSeqRuns_UMCG-IBD-TIFN_Taxman_100Pc_GG13-Reducing_stomach_acid2.txt;miSeqRuns_UMCG-IBD-TIFN_Taxman_100Pc_GG13-ZICPPI.txt	1828	408	Decreased	-0.702056	0.482645	0.471075	0.000518583	0.000327563	0.000496895	0.000612669	0.000353777	3.264e-06	0.000736691	0.000155648	0.000180364	0	476	38	93	19	15	7	368	12	0	0.603091
PPI	Increased	k__Bacteria|p__Synergistetes|c__Synergistia|o__Synergistales	8.1912345228632E-4;2.28550751651457E-4;-1.49307724464416E-5	345;1174;309	35;103;5	0.401977343760629;0.644786609151984;0.93457704778921	0.858855298985625;0.967470311876441;0.97223221867752	0.8380950126134716;0.4610167203215272;-0.08208760732153514	miSeqRuns_UMCG-IBD-TIFN_Taxman_100Pc_GG13-PPI.txt;miSeqRuns_UMCG-IBD-TIFN_Taxman_100Pc_GG13-Reducing_stomach_acid2.txt;miSeqRuns_UMCG-IBD-TIFN_Taxman_100Pc_GG13-ZICPPI.txt	1828	143	Increased	0.699801	0.484051	0.471075	2.33542e-05	2.15241e-05	2.25064e-05	2.44304e-05	1.40868e-06	1.84227e-06	4.48082e-05	3.90376e-05	0	0	154	22	29	15	4	1	121	6	0	0.805753
PPI	Increased	k__Bacteria|p__Cyanobacteria|c__Chloroplast|o__Streptophyta	6.44363725012438E-4;3.83418395280655E-4;-2.68220692363396E-4	345;1174;309	71;569;104	0.279684544898725;0.601479388456342;0.64179983121548	0.779492137626724;0.947578125123682;0.880600550515624	1.0810282558207993;0.5222742596636809;-0.4651838107033692	miSeqRuns_UMCG-IBD-TIFN_Taxman_100Pc_GG13-PPI.txt;miSeqRuns_UMCG-IBD-TIFN_Taxman_100Pc_GG13-Reducing_stomach_acid2.txt;miSeqRuns_UMCG-IBD-TIFN_Taxman_100Pc_GG13-ZICPPI.txt	1828	744	Increased	0.696924	0.48585	0.471244	0.000112567	0.000115718	0.000131742	0.000158627	0.000145504	0.000116962	1.3774e-05	3.09615e-05	0.00102588	1	801	80	59	48	81	22	661	10	0	0.556525
PPI	Increased	k__Bacteria|p__Proteobacteria|c__Gammaproteobacteria|o__Enterobacteriales|f__Enterobacteriaceae|g__Trabulsiella	-2.13273516642037E-4;6.43796469579596E-5;1.3913183255691E-4	345;1174;309	7;10;12	0.288752753931628;0.297196152682355;0.472910052716921	0.795504275732168;0.728042646215946;0.822943763018126	-1.0608617071768631;1.0424649818701746;0.7177522621539875	miSeqRuns_UMCG-IBD-TIFN_Taxman_100Pc_GG13-PPI.txt;miSeqRuns_UMCG-IBD-TIFN_Taxman_100Pc_GG13-Reducing_stomach_acid2.txt;miSeqRuns_UMCG-IBD-TIFN_Taxman_100Pc_GG13-ZICPPI.txt	1828	29	Increased	0.669651	0.503081	0.48633	7.48528e-07	1.31081e-06	3.2025e-07	4.32222e-07	1.29048e-06	3.87467e-06	1.88966e-06	0	0	0	37	7	7	3	8	4	22	0	12.2382	0.319995
PPI	Decreased	k__Bacteria|p__Proteobacteria|c__Betaproteobacteria	-0.00250541162344833;-0.00123712327070161;-3.20581865659948E-4	345;1174;309	307;1095;289	0.571709273300062;0.615129070865369;0.969440608648725	0.935968509893371;0.953831003550811;0.987452612830796	-0.5655359585549675;-0.5027656157918192;-0.03830988604626997	miSeqRuns_UMCG-IBD-TIFN_Taxman_100Pc_GG13-PPI.txt;miSeqRuns_UMCG-IBD-TIFN_Taxman_100Pc_GG13-Reducing_stomach_acid2.txt;miSeqRuns_UMCG-IBD-TIFN_Taxman_100Pc_GG13-ZICPPI.txt	1828	1691	Decreased	-0.664351	0.506466	0.487875	0.00276167	0.00316805	0.00165398	0.0011624	0.00871048	0.00749134	0.00192119	0.00197515	0	0	1983	185	260	88	228	54	1495	43	0	0.935799
PPI	Decreased	k__Bacteria|p__Proteobacteria|c__Betaproteobacteria|o__Burkholderiales	-0.00252698503863031;-0.00125834597516366;-8.71699783627281E-5	345;1174;309	307;1094;288	0.568414090652162;0.609084235146459;0.991704499113288	0.933805333655855;0.950610209995214;0.99583581397349	-0.5703887020782566;-0.5113810877308058;-0.010397055852551096	miSeqRuns_UMCG-IBD-TIFN_Taxman_100Pc_GG13-PPI.txt;miSeqRuns_UMCG-IBD-TIFN_Taxman_100Pc_GG13-Reducing_stomach_acid2.txt;miSeqRuns_UMCG-IBD-TIFN_Taxman_100Pc_GG13-ZICPPI.txt	1828	1689	Decreased	-0.661887	0.508044	0.487875	0.00275883	0.0031645	0.00165295	0.00115901	0.00869849	0.00748564	0.00191926	0.0019738	0	0	1978	185	260	88	226	54	1492	43	0	0.928269
PPI	Increased	k__Bacteria|p__Firmicutes|c__Clostridia|o__Clostridiales|f__Veillonellaceae|g__Megamonas	-0.00124674996795379;9.86839471856983E-4;0.0107845321054096	345;1174;309	27;93;56	0.757793537652813;0.725439884146876;0.214933675096041	0.979701824923356;0.981222930219696;0.688145216062231	-0.30837955436225056;0.3511979017691227;1.2401128003254516	miSeqRuns_UMCG-IBD-TIFN_Taxman_100Pc_GG13-PPI.txt;miSeqRuns_UMCG-IBD-TIFN_Taxman_100Pc_GG13-Reducing_stomach_acid2.txt;miSeqRuns_UMCG-IBD-TIFN_Taxman_100Pc_GG13-ZICPPI.txt	1828	176	Increased	0.65734	0.510963	0.489059	0.000988731	0.00208953	0.000710927	0.000498937	0.00255009	0.00627268	0.000720055	0.000255795	0	0	216	26	23	11	44	11	149	4	0	0.515761
PPI	Decreased	k__Bacteria|p__Firmicutes|c__Clostridia|o__Clostridiales|f__Clostridiaceae|g__Clostridium|s__butyricum	-7.64865473850835E-5;-2.79442099240696E-5;-7.13499082688107E-4	345;1174;309	2;37;30	0.509202913490639;0.863799738043321;0.576697397699412	0.911832980986189;0.990483578093088;0.85046743809239	-0.6600793439220236;-0.17153929160949116;-0.5582152658909407	miSeqRuns_UMCG-IBD-TIFN_Taxman_100Pc_GG13-PPI.txt;miSeqRuns_UMCG-IBD-TIFN_Taxman_100Pc_GG13-Reducing_stomach_acid2.txt;miSeqRuns_UMCG-IBD-TIFN_Taxman_100Pc_GG13-ZICPPI.txt	1828	69	Decreased	-0.653735	0.513282	0.489663	1.50332e-05	6.96681e-06	2.26031e-06	2.96796e-06	8.92804e-05	1.94867e-05	6.2928e-07	0	0	0	90	6	2	1	25	5	63	0	0	0.839724
PPI	Decreased	k__Archaea|p__Euryarchaeota|c__Thermoplasmata|o__E2|f__Methanomassiliicoccaceae	-4.48780425634894E-5;-3.88677689887141E-5;-1.75493503580185E-4	345;1174;309	6;24;3	0.73872526273396;0.842397747353272;0.400315664812144	0.973371864020578;0.990483578093088;0.79935942725263	-0.3335419052721082;-0.19882741844464416;-0.8410576034112771	miSeqRuns_UMCG-IBD-TIFN_Taxman_100Pc_GG13-PPI.txt;miSeqRuns_UMCG-IBD-TIFN_Taxman_100Pc_GG13-Reducing_stomach_acid2.txt;miSeqRuns_UMCG-IBD-TIFN_Taxman_100Pc_GG13-ZICPPI.txt	1828	33	Decreased	-0.650034	0.51567	0.490328	2.82786e-06	8.97633e-07	3.45896e-06	1.90407e-06	2.41164e-06	0	8.27426e-07	0	0	0	36	4	5	4	3	0	28	0	0	0.80428
PPI	Increased	k__Bacteria|p__Proteobacteria|c__Gammaproteobacteria|o__Pseudomonadales|f__Moraxellaceae	1.62741878724676E-4;5.20410466249652E-6;1.49870158092102E-4	345;1174;309	6;46;26	0.253247357707505;0.963707198972106;0.816472091659975	0.758526485805519;0.994555003200321;0.933577517378063	1.142497324055799;0.045501977178478405;0.2320848756783233	miSeqRuns_UMCG-IBD-TIFN_Taxman_100Pc_GG13-PPI.txt;miSeqRuns_UMCG-IBD-TIFN_Taxman_100Pc_GG13-Reducing_stomach_acid2.txt;miSeqRuns_UMCG-IBD-TIFN_Taxman_100Pc_GG13-ZICPPI.txt	1828	78	Increased	0.628222	0.529859	0.500919	4.2705e-06	2.85538e-06	1.18366e-06	1.04737e-06	2.24544e-05	6.58232e-06	5.88927e-07	1.98039e-06	0	0	86	13	3	4	19	7	64	2	0	0.616754
PPI	Decreased	k__Bacteria|p__Cyanobacteria	-7.36073975211473E-4;3.45135399721161E-5;-0.00124120621828892	345;1174;309	151;776;142	0.441607396911803;0.979565211377003;0.445254895561045	0.88027235046815;0.996004905878213;0.814773704634341	-0.7694817122023664;0.02561400999462123;-0.7633496559741942	miSeqRuns_UMCG-IBD-TIFN_Taxman_100Pc_GG13-PPI.txt;miSeqRuns_UMCG-IBD-TIFN_Taxman_100Pc_GG13-Reducing_stomach_acid2.txt;miSeqRuns_UMCG-IBD-TIFN_Taxman_100Pc_GG13-ZICPPI.txt	1828	1069	Decreased	-0.627605	0.530263	0.500919	0.000405613	0.000409647	0.00047353	0.00038022	0.000368903	0.000690215	0.000183593	0.000136691	0.00110486	1	1190	112	128	64	111	28	951	20	0	0.676525
PPI	Increased	k__Bacteria|p__Proteobacteria|c__Alphaproteobacteria|o__Rhizobiales|f__Methylobacteriaceae|g__Methylobacterium	1.90809163200391E-4;2.04575718235735E-5;-3.22194981796662E-5	345;1174;309	12;7;1	0.282951197276056;0.644184791518847;0.598618108965911	0.784717987112261;0.967470311876441;0.858719234076127	1.0737133027786525;0.46185571765836647;-0.5263887811198048	miSeqRuns_UMCG-IBD-TIFN_Taxman_100Pc_GG13-PPI.txt;miSeqRuns_UMCG-IBD-TIFN_Taxman_100Pc_GG13-Reducing_stomach_acid2.txt;miSeqRuns_UMCG-IBD-TIFN_Taxman_100Pc_GG13-ZICPPI.txt	1828	20	Increased	0.620163	0.53515	0.503895	3.15769e-07	8.54762e-07	1.65405e-07	2.06061e-07	2.06224e-07	0	9.66436e-07	3.11961e-06	0	0	26	4	9	1	1	0	16	3	0	0.53295
PPI	Increased	k__Bacteria|p__Firmicutes|c__Clostridia|o__Clostridiales|f__Eubacteriaceae|g__Anaerofustis	4.85167710059033E-4;2.50815841944607E-4;9.17083219524526E-5	345;1174;309	221;613;168	0.610351878001052;0.656044225691489;0.932345023029339	0.938249608898661;0.967933831282695;0.970919797596517	0.5095712384599662;0.44538129736076265;0.08489480356466139	miSeqRuns_UMCG-IBD-TIFN_Taxman_100Pc_GG13-PPI.txt;miSeqRuns_UMCG-IBD-TIFN_Taxman_100Pc_GG13-Reducing_stomach_acid2.txt;miSeqRuns_UMCG-IBD-TIFN_Taxman_100Pc_GG13-ZICPPI.txt	1828	1002	Increased	0.613203	0.539742	0.505358	6.38209e-05	8.41347e-05	5.12896e-05	6.29387e-05	9.90283e-05	0.000112589	8.10738e-05	9.18046e-05	0	0	1189	121	181	50	132	33	876	38	0	0.956372
PPI	Decreased	k__Bacteria|p__Firmicutes|c__Clostridia|o__Clostridiales|f__Clostridiaceae|g__Clostridium|s__neonatale	-1.58833051665666E-5;-4.43155675367546E-5;-8.76955268817507E-4	345;1174;309	2;8;33	0.84624105118684;0.692504851883367;0.607188162735176	0.991109715557945;0.976275315759913;0.860868224907239	-0.19391677152563025;-0.39545808145605665;-0.5140912957020185	miSeqRuns_UMCG-IBD-TIFN_Taxman_100Pc_GG13-PPI.txt;miSeqRuns_UMCG-IBD-TIFN_Taxman_100Pc_GG13-Reducing_stomach_acid2.txt;miSeqRuns_UMCG-IBD-TIFN_Taxman_100Pc_GG13-ZICPPI.txt	1828	43	Decreased	-0.612525	0.54019	0.505358	2.40917e-05	7.88878e-06	1.16762e-06	1.73737e-07	0.00015486	2.7324e-05	3.13841e-07	0	0	0	59	7	2	1	24	6	33	0	0	0.959305
PPI	Decreased	k__Bacteria|p__Proteobacteria|c__Alphaproteobacteria|o__Rickettsiales|f__mitochondria	4.02068336870525E-4;-4.05032589639221E-4;-4.76479053108297E-4	345;1174;309	30;313;62	0.175762900657287;0.257230860584589;0.493863983329118	0.686906367495702;0.686317355200987;0.832814430415186	1.3539168702093036;-1.1329604544154739;-0.6841760824358737	miSeqRuns_UMCG-IBD-TIFN_Taxman_100Pc_GG13-PPI.txt;miSeqRuns_UMCG-IBD-TIFN_Taxman_100Pc_GG13-Reducing_stomach_acid2.txt;miSeqRuns_UMCG-IBD-TIFN_Taxman_100Pc_GG13-ZICPPI.txt	1828	405	Decreased	-0.601056	0.547803	0.506445	2.13243e-05	1.83339e-05	2.41551e-05	2.175e-05	3.07018e-05	2.14183e-05	2.97467e-06	8.07367e-06	0	0	442	39	25	21	50	13	367	5	37.956	0.199536
PPI	Decreased	k__Bacteria|p__Firmicutes|c__Erysipelotrichi|o__Erysipelotrichales|f__Erysipelotrichaceae|g__Clostridium|s__cocleatum	-7.67727770141431E-5;-1.47742498312238E-4;1.32174735187226E-4	345;1174;309	20;114;16	0.768882425043393;0.498475233800606;0.86536764466547	0.980620380595767;0.886654121561551;0.9502998918379	-0.2938370464527995;-0.6768908124560666;0.1695454260843689	miSeqRuns_UMCG-IBD-TIFN_Taxman_100Pc_GG13-PPI.txt;miSeqRuns_UMCG-IBD-TIFN_Taxman_100Pc_GG13-Reducing_stomach_acid2.txt;miSeqRuns_UMCG-IBD-TIFN_Taxman_100Pc_GG13-ZICPPI.txt	1828	150	Decreased	-0.600401	0.548239	0.506445	8.3079e-06	5.32685e-06	4.58166e-06	2.73143e-06	3.15042e-05	1.17088e-05	2.82485e-06	2.85686e-06	0	0	167	11	17	5	12	3	138	3	0	0.899071
PPI	Decreased	k__Bacteria|p__Firmicutes|c__Clostridia|o__Clostridiales|f__Ruminococcaceae|g__Anaerotruncus	-5.22696792077011E-4;4.17519392503992E-4;-8.84401075312088E-4	345;1174;309	116;451;72	0.268852474155524;0.289871161937299;0.018644915564427	0.77530722009439;0.716534256090602;0.331630898172608	-1.1057090441823267;1.0584042955270783;-2.3525553318501133	miSeqRuns_UMCG-IBD-TIFN_Taxman_100Pc_GG13-PPI.txt;miSeqRuns_UMCG-IBD-TIFN_Taxman_100Pc_GG13-Reducing_stomach_acid2.txt;miSeqRuns_UMCG-IBD-TIFN_Taxman_100Pc_GG13-ZICPPI.txt	1828	639	Decreased	-0.599389	0.548913	0.506445	2.89397e-05	3.27868e-05	3.47327e-05	5.44976e-05	1.36121e-05	1.08095e-05	2.01733e-05	1.64979e-05	0	0	742	59	105	39	60	10	577	10	73.3974	0.0233063
PPI	Increased	k__Bacteria|p__Bacteroidetes|c__Bacteroidia|o__Bacteroidales|f__Barnesiellaceae|g__Barnesiella|s__viscericola	-1.16651701981882E-4;2.1162278141881E-5;0.00134257161155715	345;1174;309	8;12;6	0.921036351707721;0.911774303728778;0.179430465855087	0.991109715557945;0.990483578093088;0.640802862510829	-0.09912836408974551;0.11080080910768998;1.342510692325917	miSeqRuns_UMCG-IBD-TIFN_Taxman_100Pc_GG13-PPI.txt;miSeqRuns_UMCG-IBD-TIFN_Taxman_100Pc_GG13-Reducing_stomach_acid2.txt;miSeqRuns_UMCG-IBD-TIFN_Taxman_100Pc_GG13-ZICPPI.txt	1828	26	Increased	0.597692	0.550045	0.506445	1.75001e-05	3.2653e-05	3.24267e-06	2.09743e-06	2.43931e-05	0.0001101	6.47859e-05	8.52941e-07	0	0	28	6	6	2	3	2	19	2	0	0.480177
PPI	Decreased	k__Bacteria|p__Proteobacteria|c__Gammaproteobacteria|o__Enterobacteriales|f__Enterobacteriaceae|[g__Klebsiella/g__Citrobacter]	-1.59435337211749E-4;-7.12497114049286E-5;2.34735738668436E-4	345;1174;309	6;15;4	0.256373358210071;0.450801962212976;0.223331536328279	0.76240020106315;0.853765951181687;0.698522045881348	-1.135004678307253;-0.7540787071014873;1.2177169953988671	miSeqRuns_UMCG-IBD-TIFN_Taxman_100Pc_GG13-PPI.txt;miSeqRuns_UMCG-IBD-TIFN_Taxman_100Pc_GG13-Reducing_stomach_acid2.txt;miSeqRuns_UMCG-IBD-TIFN_Taxman_100Pc_GG13-ZICPPI.txt	1828	25	Decreased	-0.596742	0.55068	0.506445	8.96964e-07	1.20514e-06	8.34972e-07	1.50505e-07	1.14407e-06	3.96967e-06	9.21488e-07	0	0	0	28	4	6	1	1	3	21	0	32.967	0.224967
PPI	Increased	k__Bacteria|p__Firmicutes|c__Bacilli|o__Lactobacillales|f__Lactobacillaceae|g__Lactobacillus|s__mucosae	0.00205980894580235;-0.00103844601459149;0.0151465874748013	345;1174;309	13;62;70	0.23594346096985;0.385153312394344;0.0590698422108592	0.740462965524827;0.816687907446299;0.486555923597201	1.1851871461353756;-0.8684403524565356;1.8876731564905005	miSeqRuns_UMCG-IBD-TIFN_Taxman_100Pc_GG13-PPI.txt;miSeqRuns_UMCG-IBD-TIFN_Taxman_100Pc_GG13-Reducing_stomach_acid2.txt;miSeqRuns_UMCG-IBD-TIFN_Taxman_100Pc_GG13-ZICPPI.txt	1828	145	Increased	0.595021	0.55183	0.506445	0.000332391	0.00209746	0.000134204	2.68831e-05	0.00150114	0.00706973	9.49591e-05	0.000267077	2.43955e-06	0	176	26	10	4	49	19	117	3	62.743	0.0682854
PPI	Decreased	k__Archaea|p__Euryarchaeota|c__Methanobacteria|o__Methanobacteriales|f__Methanobacteriaceae|g__Methanobrevibacter	-0.0134903025423829;0.00565864813507667;-0.0122556744463147	345;1174;309	204;759;52	0.273008594638411;0.53982244806616;0.144534082499483	0.77530722009439;0.90817403386139;0.607587285679769	-1.096160380364769;0.6130815059876458;-1.4591127320285593	miSeqRuns_UMCG-IBD-TIFN_Taxman_100Pc_GG13-PPI.txt;miSeqRuns_UMCG-IBD-TIFN_Taxman_100Pc_GG13-Reducing_stomach_acid2.txt;miSeqRuns_UMCG-IBD-TIFN_Taxman_100Pc_GG13-ZICPPI.txt	1828	1015	Decreased	-0.584789	0.55869	0.508522	0.010103	0.00962401	0.0117128	0.014906	0.00370008	0.00239928	0.00945447	0.0078704	9.62189e-06	0	1130	96	176	59	39	11	915	26	40.5553	0.185958
PPI	Decreased	k__Bacteria|p__Firmicutes|c__Erysipelotrichi|o__Erysipelotrichales|f__Erysipelotrichaceae|g__Sharpea	-9.74976175168387E-5;-1.02064204115034E-4;0.00268419566877613	345;1174;309	3;31;5	0.270531484488854;0.340140496654686;0.108099639335046	0.77530722009439;0.785734133051049;0.561737519988038	-1.1018394310633592;-0.953887687273446;1.6067936607347006	miSeqRuns_UMCG-IBD-TIFN_Taxman_100Pc_GG13-PPI.txt;miSeqRuns_UMCG-IBD-TIFN_Taxman_100Pc_GG13-Reducing_stomach_acid2.txt;miSeqRuns_UMCG-IBD-TIFN_Taxman_100Pc_GG13-ZICPPI.txt	1828	39	Decreased	-0.582494	0.560234	0.508522	8.25437e-07	0.000180125	1.06672e-06	3.4899e-07	2.98755e-07	0.000629863	3.67128e-07	0	0	0	41	4	3	2	3	2	35	0	54.1961	0.112678
PPI	Increased	k__Bacteria|p__Proteobacteria|c__Alphaproteobacteria|o__Rhizobiales|f__Methylobacteriaceae	1.80401491545963E-4;2.04575718235735E-5;-4.39414038998501E-5	345;1174;309	13;7;3	0.323520812838281;0.644184791518847;0.597264212313299	0.816402585170785;0.967470311876441;0.858719234076127	0.987248536654734;0.46185571765836647;-0.5283387912989457	miSeqRuns_UMCG-IBD-TIFN_Taxman_100Pc_GG13-PPI.txt;miSeqRuns_UMCG-IBD-TIFN_Taxman_100Pc_GG13-Reducing_stomach_acid2.txt;miSeqRuns_UMCG-IBD-TIFN_Taxman_100Pc_GG13-ZICPPI.txt	1828	23	Increased	0.581798	0.560702	0.508522	3.58822e-07	8.54762e-07	1.65405e-07	2.06061e-07	3.84232e-07	0	1.05709e-06	3.11961e-06	0	0	32	4	10	1	3	0	19	3	0	0.568752
PPI	Decreased	k__Bacteria|p__Firmicutes|c__Clostridia|o__Clostridiales|f__Lachnospiraceae|[g__Dorea/g__[Ruminococcus]]	-1.52469824365484E-5;-2.92238709727692E-4;-3.80596413928422E-4	345;1174;309	282;940;190	0.986475552978001;0.605568823146134;0.701371218843887	0.998618740816006;0.949941873504893;0.898201536292421	-0.016951192417924088;-0.5164089399606526;-0.3834701227977672	miSeqRuns_UMCG-IBD-TIFN_Taxman_100Pc_GG13-PPI.txt;miSeqRuns_UMCG-IBD-TIFN_Taxman_100Pc_GG13-Reducing_stomach_acid2.txt;miSeqRuns_UMCG-IBD-TIFN_Taxman_100Pc_GG13-ZICPPI.txt	1828	1412	Decreased	-0.578871	0.562676	0.508522	9.8422e-05	0.000118926	9.16918e-05	9.46985e-05	0.000117458	0.000139662	0.000107582	0.00014156	0	0	1647	147	239	75	152	32	1256	40	0	0.961307
PPI	Decreased	k__Bacteria|p__Proteobacteria|c__Betaproteobacteria|o__Burkholderiales|f__Alcaligenaceae	-0.00271268826091941;-9.56351154713752E-4;1.42394551474844E-4	345;1174;309	302;1078;286	0.537568674749399;0.694128072861838;0.986479875254144	0.924084994610537;0.976275315759913;0.993634522746758	-0.6164937816526834;-0.39325916807898104;0.01694577447002884	miSeqRuns_UMCG-IBD-TIFN_Taxman_100Pc_GG13-PPI.txt;miSeqRuns_UMCG-IBD-TIFN_Taxman_100Pc_GG13-Reducing_stomach_acid2.txt;miSeqRuns_UMCG-IBD-TIFN_Taxman_100Pc_GG13-ZICPPI.txt	1828	1666	Decreased	-0.576013	0.564607	0.508522	0.00265132	0.00310502	0.00153177	0.00109009	0.00866523	0.00745477	0.00180068	0.00189902	0	0	1957	179	258	85	224	54	1475	40	0	0.903385
PPI	Decreased	k__Bacteria|p__Proteobacteria|c__Betaproteobacteria|o__Burkholderiales|f__Alcaligenaceae|g__Sutterella	-0.00271268826091941;-9.56315462538587E-4;1.42394551474844E-4	345;1174;309	302;1078;286	0.537568674749399;0.694137192537677;0.986479875254144	0.924084994610537;0.976275315759913;0.993634522746758	-0.6164937816526834;-0.393246819394092;0.01694577447002884	miSeqRuns_UMCG-IBD-TIFN_Taxman_100Pc_GG13-PPI.txt;miSeqRuns_UMCG-IBD-TIFN_Taxman_100Pc_GG13-Reducing_stomach_acid2.txt;miSeqRuns_UMCG-IBD-TIFN_Taxman_100Pc_GG13-ZICPPI.txt	1828	1666	Decreased	-0.576003	0.564613	0.508522	0.00265131	0.00310502	0.00153176	0.00109009	0.00866523	0.00745477	0.00180068	0.00189902	0	0	1957	179	258	85	224	54	1475	40	0	0.903384
PPI	Increased	k__Bacteria|p__Firmicutes|c__Clostridia|o__Clostridiales|f__Peptococcaceae|g__rc4-4	-2.9135545215977E-4;4.97533273896219E-4;1.83380983418976E-4	345;1174;309	65;248;56	0.778195073592818;0.436133003119722;0.880869148048756	0.98157274480092;0.840787256305309;0.952852054888902	-0.2816719382909442;0.7787398049792021;0.14986750668207688	miSeqRuns_UMCG-IBD-TIFN_Taxman_100Pc_GG13-PPI.txt;miSeqRuns_UMCG-IBD-TIFN_Taxman_100Pc_GG13-Reducing_stomach_acid2.txt;miSeqRuns_UMCG-IBD-TIFN_Taxman_100Pc_GG13-ZICPPI.txt	1828	369	Increased	0.563327	0.573212	0.51072	4.68e-05	6.0032e-05	3.93187e-05	5.74324e-05	7.48596e-05	7.89555e-05	5.12291e-05	4.28152e-05	1.58497e-06	0	427	41	56	23	45	9	326	9	0	0.822465
PPI	Decreased	k__Archaea|p__Euryarchaeota	-0.0110152797781417;0.00566293569856385;-0.014404658060803	345;1174;309	209;766;55	0.389549201775683;0.556199493920937;0.107820510539388	0.85246888535102;0.924424695031103;0.561737519988038	-0.8604351773173159;0.5884958867606094;-1.6080669778419017	miSeqRuns_UMCG-IBD-TIFN_Taxman_100Pc_GG13-PPI.txt;miSeqRuns_UMCG-IBD-TIFN_Taxman_100Pc_GG13-Reducing_stomach_acid2.txt;miSeqRuns_UMCG-IBD-TIFN_Taxman_100Pc_GG13-ZICPPI.txt	1828	1030	Decreased	-0.563326	0.573213	0.51072	0.0108101	0.0107118	0.0125054	0.0162656	0.00429188	0.00239928	0.00993943	0.00971021	1.44153e-05	0	1150	98	180	60	42	11	928	27	40.3914	0.18682
PPI	Decreased	k__Archaea	-0.0110152797781417;0.00566293569856385;-0.014404658060803	345;1174;309	209;766;55	0.389549201775683;0.556199493920937;0.107820510539388	0.85246888535102;0.924424695031103;0.561737519988038	-0.8604351773173159;0.5884958867606094;-1.6080669778419017	miSeqRuns_UMCG-IBD-TIFN_Taxman_100Pc_GG13-PPI.txt;miSeqRuns_UMCG-IBD-TIFN_Taxman_100Pc_GG13-Reducing_stomach_acid2.txt;miSeqRuns_UMCG-IBD-TIFN_Taxman_100Pc_GG13-ZICPPI.txt	1828	1030	Decreased	-0.563326	0.573213	0.51072	0.0108101	0.0107118	0.0125054	0.0162656	0.00429188	0.00239928	0.00993943	0.00971021	5.36768e-05	0	1150	98	180	60	42	11	928	27	40.3914	0.18682
PPI	Decreased	k__Archaea|p__Euryarchaeota|c__Methanobacteria|o__Methanobacteriales|f__Methanobacteriaceae	-0.0110142891267709;0.005677300303912;-0.0144000722754824	345;1174;309	209;766;55	0.389576459090704;0.555157628214296;0.107837777534886	0.85246888535102;0.923342181777242;0.561737519988038	-0.8603857122680054;0.5900492548809319;-1.6079881343661446	miSeqRuns_UMCG-IBD-TIFN_Taxman_100Pc_GG13-PPI.txt;miSeqRuns_UMCG-IBD-TIFN_Taxman_100Pc_GG13-Reducing_stomach_acid2.txt;miSeqRuns_UMCG-IBD-TIFN_Taxman_100Pc_GG13-ZICPPI.txt	1828	1030	Decreased	-0.562027	0.574097	0.51072	0.0108072	0.0107109	0.012502	0.0162636	0.00428946	0.00239928	0.0099386	0.00971021	1.04887e-05	0	1150	98	180	60	42	11	928	27	40.4438	0.186544
PPI	Decreased	k__Bacteria|p__Bacteroidetes|c__Bacteroidia|o__Bacteroidales|[f__[Barnesiellaceae]/f__S24-7]	-0.00129535232716188;6.48777688375665E-4;-0.00440379977210273	345;1174;309	70;212;56	0.443945387463352;0.455695586092191;0.045321670075173	0.881299857191299;0.854300253473964;0.444157936450849	-0.765547845219674;0.7459533661361498;-2.001656665439575	miSeqRuns_UMCG-IBD-TIFN_Taxman_100Pc_GG13-PPI.txt;miSeqRuns_UMCG-IBD-TIFN_Taxman_100Pc_GG13-Reducing_stomach_acid2.txt;miSeqRuns_UMCG-IBD-TIFN_Taxman_100Pc_GG13-ZICPPI.txt	1828	338	Decreased	-0.55774	0.577022	0.511752	0.000114809	6.79959e-05	7.26191e-05	7.67259e-05	0.000282488	5.55778e-05	0.000131916	6.56586e-05	0	0	410	33	60	20	49	5	301	8	58.6612	0.0890077
PPI	Increased	k__Bacteria	0.0108680780211661;-0.00573582204892793;0.0144050459326703	345;1174;309	345;1174;309	0.395980346269347;0.551083419734641;0.107811305427008	0.852750251569989;0.9199537732667;0.561737519988038	0.8488220003908962;-0.596137431922143;1.60810901373609	miSeqRuns_UMCG-IBD-TIFN_Taxman_100Pc_GG13-PPI.txt;miSeqRuns_UMCG-IBD-TIFN_Taxman_100Pc_GG13-Reducing_stomach_acid2.txt;miSeqRuns_UMCG-IBD-TIFN_Taxman_100Pc_GG13-ZICPPI.txt	1828	1828	Increased	0.552174	0.580829	0.51257	0.98919	0.989288	0.987495	0.983734	0.995708	0.997601	0.990061	0.99029	0.999946	1	2135	210	289	99	241	60	1605	51	40.4229	0.186654
PPI	Increased	k__Bacteria|p__Actinobacteria|c__Actinobacteria|o__Actinomycetales|f__Micrococcaceae|g__Rothia|s__aeria	-6.33070638224014E-5;6.49857142464829E-5;2.08065941632318E-4	345;1174;309	19;81;19	0.744838425074468;0.729273755745076;0.3133176450114	0.976085076471407;0.981222930219696;0.766455146629365	-0.32545276675858376;0.3460917600707293;1.0082850352622414	miSeqRuns_UMCG-IBD-TIFN_Taxman_100Pc_GG13-PPI.txt;miSeqRuns_UMCG-IBD-TIFN_Taxman_100Pc_GG13-Reducing_stomach_acid2.txt;miSeqRuns_UMCG-IBD-TIFN_Taxman_100Pc_GG13-ZICPPI.txt	1828	119	Increased	0.550516	0.581965	0.51257	2.77576e-06	2.32676e-06	3.24339e-06	2.39677e-06	2.07959e-06	3.11565e-06	1.61688e-06	1.26275e-06	0.00422601	1	135	17	17	10	15	5	103	2	0	0.625231
PPI	Increased	k__Bacteria|p__Bacteroidetes|c__Bacteroidia|o__Bacteroidales|f__Porphyromonadaceae|g__Parabacteroides	-0.00280764163438758;0.00166835726126973;0.00791614768891402	345;1174;309	329;1128;264	0.696407361026261;0.660415605392837;0.373266448096226	0.960349598409694;0.969500838367632;0.789016032245095	-0.39017471007608917;0.4393394331843458;0.8903714855561294	miSeqRuns_UMCG-IBD-TIFN_Taxman_100Pc_GG13-PPI.txt;miSeqRuns_UMCG-IBD-TIFN_Taxman_100Pc_GG13-Reducing_stomach_acid2.txt;miSeqRuns_UMCG-IBD-TIFN_Taxman_100Pc_GG13-ZICPPI.txt	1828	1721	Increased	0.548648	0.583247	0.51257	0.00568007	0.00710919	0.00444051	0.00450904	0.00971437	0.0103469	0.0069266	0.00834752	1.63654e-05	0	2010	186	278	92	209	48	1523	46	0	0.658032
PPI	Decreased	k__Bacteria|p__Proteobacteria|c__Gammaproteobacteria|o__Enterobacteriales|f__Enterobacteriaceae|g__Enterobacter|s__cancerogenus	-2.62473968701438E-4;-8.38955663163035E-5;3.61916283547963E-4	345;1174;309	4;16;10	0.243531445082965;0.504245329260928;0.227876578405212	0.751553914276843;0.891174242535856;0.703589899692465	-1.1662053127460097;-0.6678249641635642;1.2058467693362802	miSeqRuns_UMCG-IBD-TIFN_Taxman_100Pc_GG13-PPI.txt;miSeqRuns_UMCG-IBD-TIFN_Taxman_100Pc_GG13-Reducing_stomach_acid2.txt;miSeqRuns_UMCG-IBD-TIFN_Taxman_100Pc_GG13-ZICPPI.txt	1828	30	Decreased	-0.546054	0.585029	0.512583	1.79882e-06	2.81171e-06	1.46644e-06	2.51515e-07	2.60497e-06	9.42598e-06	2.36295e-06	0	0	0	31	5	4	1	4	4	23	0	32.4762	0.22742
PPI	Increased	k__Bacteria|p__Synergistetes|c__Synergistia|o__Synergistales|f__Synergistaceae|g__Cloacibacillus	5.56458394147706E-4;1.44070402214275E-4;-2.06194590238264E-5	345;1174;309	18;52;1	0.500997318254379;0.620224905510921;0.721077576998679	0.904840308511528;0.956365827304757;0.902597204548202	0.6729213664150018;0.4955316230382087;-0.3570190065345919	miSeqRuns_UMCG-IBD-TIFN_Taxman_100Pc_GG13-PPI.txt;miSeqRuns_UMCG-IBD-TIFN_Taxman_100Pc_GG13-Reducing_stomach_acid2.txt;miSeqRuns_UMCG-IBD-TIFN_Taxman_100Pc_GG13-ZICPPI.txt	1828	71	Increased	0.542669	0.587358	0.513073	1.12277e-05	8.06865e-06	7.54041e-06	7.82707e-06	1.84232e-07	0	3.41526e-05	1.80301e-05	0	0	77	10	15	7	1	0	61	3	0	0.766689
PPI	Increased	k__Bacteria|p__Bacteroidetes|c__Bacteroidia|o__Bacteroidales|f__Bacteroidaceae|g__Bacteroides|s__acidifaciens	-1.18359913526182E-4;3.76275307104122E-4;-2.14391825202238E-4	345;1174;309	139;408;140	0.868533874043498;0.364825788207688;0.775486518049628	0.991109715557945;0.804058751053104;0.921465868537592	-0.16552106117619464;0.9062079645628602;-0.2852057465019341	miSeqRuns_UMCG-IBD-TIFN_Taxman_100Pc_GG13-PPI.txt;miSeqRuns_UMCG-IBD-TIFN_Taxman_100Pc_GG13-Reducing_stomach_acid2.txt;miSeqRuns_UMCG-IBD-TIFN_Taxman_100Pc_GG13-ZICPPI.txt	1828	687	Increased	0.537062	0.591225	0.514886	3.68328e-05	4.75996e-05	3.43476e-05	4.04739e-05	4.13125e-05	6.55376e-05	4.23413e-05	4.03284e-05	0	0	829	80	119	35	109	26	601	19	0	0.725599
PPI	Increased	k__Bacteria|p__Lentisphaerae|c__Lentisphaeria|o__Victivallales|f__Victivallaceae|g__Victivallis|s__vadensis	-5.70374007295959E-5;-8.18989850977788E-5;0.0013209664778946	345;1174;309	23;84;11	0.833144531689484;0.719116399109847;0.0261691663000324	0.991109715557945;0.981222930219696;0.38061964219122	-0.2106703255552792;-0.35963995658635617;2.22369211213641	miSeqRuns_UMCG-IBD-TIFN_Taxman_100Pc_GG13-PPI.txt;miSeqRuns_UMCG-IBD-TIFN_Taxman_100Pc_GG13-Reducing_stomach_acid2.txt;miSeqRuns_UMCG-IBD-TIFN_Taxman_100Pc_GG13-ZICPPI.txt	1828	118	Increased	0.534517	0.592984	0.514886	4.373e-06	2.09634e-05	4.98274e-06	2.49653e-06	3.3082e-06	6.7051e-05	2.99289e-06	2.5902e-06	0	0	133	11	20	5	7	4	106	2	58.6163	0.0892414
PPI	Increased	k__Bacteria|p__Bacteroidetes|c__Bacteroidia|o__Bacteroidales|f__Porphyromonadaceae	-0.00277359178330264;0.00158594006940753;0.00782783306849323	345;1174;309	329;1131;271	0.699751526522389;0.676235153666462;0.375832127497809	0.961773023237822;0.973855205903095;0.790417627573288	-0.385655901353744;0.41760607597901744;0.8856018255691822	miSeqRuns_UMCG-IBD-TIFN_Taxman_100Pc_GG13-PPI.txt;miSeqRuns_UMCG-IBD-TIFN_Taxman_100Pc_GG13-Reducing_stomach_acid2.txt;miSeqRuns_UMCG-IBD-TIFN_Taxman_100Pc_GG13-ZICPPI.txt	1828	1731	Increased	0.531233	0.595257	0.515317	0.00571127	0.00712635	0.0044731	0.00453029	0.00976913	0.0103603	0.00693303	0.00836107	0.00883319	1	2025	187	278	92	215	49	1532	46	0	0.661925
PPI	Increased	k__Bacteria|p__Actinobacteria|c__Coriobacteriia|o__Coriobacteriales|f__Coriobacteriaceae|g__Slackia	6.46733829648569E-4;6.05108816283588E-4;7.80695454139325E-4	345;1174;309	169;659;104	0.767557827346632;0.779417235923454;0.686998644243086	0.980620380595767;0.990483578093088;0.894685510660862	0.29557086367711854;0.2800785566205279;0.40293146359653886	miSeqRuns_UMCG-IBD-TIFN_Taxman_100Pc_GG13-PPI.txt;miSeqRuns_UMCG-IBD-TIFN_Taxman_100Pc_GG13-Reducing_stomach_acid2.txt;miSeqRuns_UMCG-IBD-TIFN_Taxman_100Pc_GG13-ZICPPI.txt	1828	932	Increased	0.51852	0.604095	0.521175	0.000678222	0.000586163	0.000744954	0.00073394	0.000577235	0.000456099	0.000514209	0.000452317	5.09621e-06	0	1041	105	142	58	78	23	821	24	0	0.970787
PPI	Increased	k__Bacteria|p__Firmicutes|c__Clostridia|o__Clostridiales|f__Lachnospiraceae|g__Clostridium|s__lavalense	-1.5530485021532E-5;-2.66737040226704E-5;0.00135403700049194	345;1174;309	4;6;28	0.848872753155515;0.60007839405461;0.0131776060333712	0.991109715557945;0.947578125123682;0.294618879025428	-0.19055690892570532;-0.5242877813263398;2.4789329902130026	miSeqRuns_UMCG-IBD-TIFN_Taxman_100Pc_GG13-PPI.txt;miSeqRuns_UMCG-IBD-TIFN_Taxman_100Pc_GG13-Reducing_stomach_acid2.txt;miSeqRuns_UMCG-IBD-TIFN_Taxman_100Pc_GG13-ZICPPI.txt	1828	38	Increased	0.516247	0.605682	0.521175	5.31102e-07	1.74459e-05	2.42884e-07	0	2.07149e-06	6.10606e-05	3.18651e-07	0	0	0	48	9	4	0	17	9	27	0	67.6887	0.0452798
PPI	Decreased	k__Bacteria|p__Proteobacteria|c__Gammaproteobacteria|o__Enterobacteriales|f__Enterobacteriaceae|g__Kluyvera|s__cryocrescens	-3.60558423536821E-5;-5.30948667795275E-5;1.02555446734258E-4	345;1174;309	7;10;4	0.754817198921788;0.351601509784915;0.367388389543237	0.979701824923356;0.79615145880194;0.78889856267915	-0.31229386917532903;-0.9314873797665871;0.9013760903194116	miSeqRuns_UMCG-IBD-TIFN_Taxman_100Pc_GG13-PPI.txt;miSeqRuns_UMCG-IBD-TIFN_Taxman_100Pc_GG13-Reducing_stomach_acid2.txt;miSeqRuns_UMCG-IBD-TIFN_Taxman_100Pc_GG13-ZICPPI.txt	1828	21	Decreased	-0.511566	0.608955	0.521175	3.54754e-07	5.60476e-07	3.06707e-07	0	3.52697e-07	1.52e-06	5.3519e-07	5.19608e-07	0	0	26	3	6	0	2	2	18	1	0	0.468608
PPI	Decreased	k__Bacteria|p__Firmicutes|c__Clostridia|o__Clostridiales|f__Peptostreptococcaceae|g__Peptostreptococcus|s__anaerobius	6.50583274074844E-5;-1.46559036829008E-4;-7.51117885755377E-4	345;1174;309	23;137;40	0.776286709439134;0.613855458360179;0.575409345700875	0.98157274480092;0.953606603231198;0.85046743809239	0.28416138111353745;-0.5045777248371084;-0.5601027633480126	miSeqRuns_UMCG-IBD-TIFN_Taxman_100Pc_GG13-PPI.txt;miSeqRuns_UMCG-IBD-TIFN_Taxman_100Pc_GG13-Reducing_stomach_acid2.txt;miSeqRuns_UMCG-IBD-TIFN_Taxman_100Pc_GG13-ZICPPI.txt	1828	200	Decreased	-0.511198	0.609212	0.521175	2.01878e-05	1.42536e-05	8.0233e-06	7.11658e-06	9.57527e-05	3.7207e-05	2.42214e-06	1.10392e-06	5.45118e-06	0	231	18	19	8	32	7	180	3	0	0.823766
PPI	Increased	k__Bacteria|p__Firmicutes|c__Clostridia|o__Clostridiales|f__Eubacteriaceae	8.141056007134E-4;-3.75870042276905E-5;6.74683937254162E-4	345;1174;309	233;661;180	0.481085213044214;0.951476460652485;0.548265390205377	0.899138737423508;0.994062265409695;0.843389593796883	0.7045582097705447;-0.06085277391780494;0.6003614250165231	miSeqRuns_UMCG-IBD-TIFN_Taxman_100Pc_GG13-PPI.txt;miSeqRuns_UMCG-IBD-TIFN_Taxman_100Pc_GG13-Reducing_stomach_acid2.txt;miSeqRuns_UMCG-IBD-TIFN_Taxman_100Pc_GG13-ZICPPI.txt	1828	1074	Increased	0.504149	0.614157	0.523301	0.000100648	0.000384888	8.45435e-05	0.00025565	0.000136249	0.000810663	0.000130864	0.000134848	1.60763e-05	0	1270	131	191	55	141	36	938	40	0	0.738461
PPI	Decreased	k__Bacteria|p__Proteobacteria|c__Betaproteobacteria|o__Burkholderiales|f__Comamonadaceae|g__Comamonas	2.75273409241426E-4;-2.13926154776016E-4;6.4697449571038E-5	345;1174;309	6;17;2	0.687819405043493;0.162978221144648;0.283474174601797	0.958842748043833;0.553030562079065;0.749810738107331	0.4018160557119137;-1.3951247590966618;1.0725475364976176	miSeqRuns_UMCG-IBD-TIFN_Taxman_100Pc_GG13-PPI.txt;miSeqRuns_UMCG-IBD-TIFN_Taxman_100Pc_GG13-Reducing_stomach_acid2.txt;miSeqRuns_UMCG-IBD-TIFN_Taxman_100Pc_GG13-ZICPPI.txt	1828	25	Decreased	-0.502514	0.615306	0.523301	5.39815e-06	9.03314e-07	2.24271e-06	0	1.02905e-07	4e-07	2.15513e-05	3.24894e-06	0	0	29	2	5	0	1	1	23	1	33.459	0.222499
PPI	Increased	k__Bacteria|p__Proteobacteria|c__Gammaproteobacteria|o__Enterobacteriales|f__Enterobacteriaceae|[g__Escherichia/g__Shigella]	-0.0012857965947003;5.4855028543742E-4;-1.97465425200469E-4	345;1174;309	81;320;113	0.10657905896753;0.095658034714628;0.733168036366283	0.574146757948823;0.427748979714016;0.905081108699775	-1.6137620044178504;1.6662781093797814;-0.3409143834336289	miSeqRuns_UMCG-IBD-TIFN_Taxman_100Pc_GG13-PPI.txt;miSeqRuns_UMCG-IBD-TIFN_Taxman_100Pc_GG13-Reducing_stomach_acid2.txt;miSeqRuns_UMCG-IBD-TIFN_Taxman_100Pc_GG13-ZICPPI.txt	1828	514	Increased	0.494112	0.621227	0.526792	4.92004e-05	0.000124277	3.93546e-05	0.000137564	0.000112961	0.000196988	3.26539e-05	1.29432e-05	0	0	598	66	73	36	84	23	441	7	61.925	0.0723389
PPI	Increased	k__Bacteria|p__Fusobacteria|c__Fusobacteriia|o__Fusobacteriales|f__Fusobacteriaceae	-4.88160844256281E-4;3.01475346462085E-4;1.66135011518726E-4	345;1174;309	47;136;119	0.577890676467401;0.476785764159124;0.695851488505546	0.935968509893371;0.868025047609743;0.897199984639458	-0.5564684210876235;0.7114817368840234;0.39092660401035184	miSeqRuns_UMCG-IBD-TIFN_Taxman_100Pc_GG13-PPI.txt;miSeqRuns_UMCG-IBD-TIFN_Taxman_100Pc_GG13-Reducing_stomach_acid2.txt;miSeqRuns_UMCG-IBD-TIFN_Taxman_100Pc_GG13-ZICPPI.txt	1828	302	Increased	0.489156	0.624732	0.528219	0.000517101	0.00108145	1.66495e-05	1.42775e-05	0.00332655	0.00375388	3.58123e-05	8.97371e-06	0	0	387	47	41	19	94	23	252	5	0	0.6944
PPI	Increased	k__Bacteria|p__Proteobacteria|c__Gammaproteobacteria|o__Enterobacteriales|f__Enterobacteriaceae|g__Citrobacter	-4.39325358345527E-4;3.76967291231483E-4;9.14153175730247E-4	345;1174;309	40;109;25	0.696336855223683;0.753655240081706;0.339907186823811	0.960349598409694;0.986297537486526;0.775637250404097	-0.39027006663540387;0.3138233089635115;0.9543486556358582	miSeqRuns_UMCG-IBD-TIFN_Taxman_100Pc_GG13-PPI.txt;miSeqRuns_UMCG-IBD-TIFN_Taxman_100Pc_GG13-Reducing_stomach_acid2.txt;miSeqRuns_UMCG-IBD-TIFN_Taxman_100Pc_GG13-ZICPPI.txt	1828	174	Increased	0.474323	0.63527	0.535568	0.000104864	6.91712e-05	0.000129659	0.000101306	4.78959e-05	6.14813e-05	6.01367e-05	1.58383e-05	0	0	200	27	35	13	17	9	148	5	0	0.626067
PPI	Decreased	k__Bacteria|p__Firmicutes|c__Erysipelotrichi|o__Erysipelotrichales|f__Erysipelotrichaceae|g__Bulleidia|s__p-1630-c5	0.0030593981951388;-0.00240857758477612;-5.75781158520957E-4	345;1174;309	52;145;18	0.543566568474103;0.40189863555432;0.881725321592796	0.92759973542807;0.82199437451914;0.953245808852036	0.6074285166246313;-0.8382351746473595;-0.1487824218306008	miSeqRuns_UMCG-IBD-TIFN_Taxman_100Pc_GG13-PPI.txt;miSeqRuns_UMCG-IBD-TIFN_Taxman_100Pc_GG13-Reducing_stomach_acid2.txt;miSeqRuns_UMCG-IBD-TIFN_Taxman_100Pc_GG13-ZICPPI.txt	1828	215	Decreased	-0.469041	0.63904	0.537185	0.000815467	0.000713424	0.000787963	0.00054092	0.000696168	0.000581934	0.00101726	0.00120298	0	0	247	25	45	14	13	5	189	6	0	0.646054
PPI	Decreased	k__Bacteria|p__Proteobacteria|c__Gammaproteobacteria|o__Enterobacteriales|f__Enterobacteriaceae|[g__Enterobacter/g__Pantoea]	-1.98919834198793E-4;-1.36505497353193E-4;0.00148416525331083	345;1174;309	6;14;26	0.486126361746239;0.434124908242924;0.257805802487724	0.902924486185898;0.839195542471147;0.728468377642481	-0.6964830610218906;-0.7821525812736694;1.1315924814604847	miSeqRuns_UMCG-IBD-TIFN_Taxman_100Pc_GG13-PPI.txt;miSeqRuns_UMCG-IBD-TIFN_Taxman_100Pc_GG13-Reducing_stomach_acid2.txt;miSeqRuns_UMCG-IBD-TIFN_Taxman_100Pc_GG13-ZICPPI.txt	1828	46	Decreased	-0.464142	0.642546	0.537669	9.00148e-06	5.88876e-05	2.86964e-06	2.51515e-07	4.278e-05	0.00020482	3.64198e-06	1.02549e-06	0	0	59	8	5	1	18	6	36	1	7.48985	0.339269
PPI	Increased	k__Archaea|p__Euryarchaeota|c__Methanobacteria|o__Methanobacteriales|f__Methanobacteriaceae|g__Methanosphaera	0.00387411633806058;0.00262353315869726;-0.00504118344743882	345;1174;309	37;121;10	0.3551467347373;0.381392351342986;0.119481007596196	0.843163839477774;0.816599023281197;0.583798087908634	0.9246524232528657;0.8753337208932741;-1.5569556830534432	miSeqRuns_UMCG-IBD-TIFN_Taxman_100Pc_GG13-PPI.txt;miSeqRuns_UMCG-IBD-TIFN_Taxman_100Pc_GG13-Reducing_stomach_acid2.txt;miSeqRuns_UMCG-IBD-TIFN_Taxman_100Pc_GG13-ZICPPI.txt	1828	168	Increased	0.463056	0.643324	0.537669	0.000703673	0.00108042	0.000788425	0.00134743	0.0005891	0	0.000483965	0.00183317	8.66836e-07	0	187	20	30	14	10	0	147	6	47.7927	0.147277
PPI	Decreased	k__Bacteria|p__Firmicutes|c__Bacilli|o__Lactobacillales|f__Leuconostocaceae|g__Weissella|s__viridescens	-1.41082339440662E-4;1.07029143298203E-4;-0.00103520490328402	345;1174;309	7;21;7	0.339685953889206;0.77155642061013;0.527856916475512	0.826674883474926;0.990354369527115;0.842573313382382	-0.9547859501311539;0.2903396338498345;-0.6312808338763211	miSeqRuns_UMCG-IBD-TIFN_Taxman_100Pc_GG13-PPI.txt;miSeqRuns_UMCG-IBD-TIFN_Taxman_100Pc_GG13-Reducing_stomach_acid2.txt;miSeqRuns_UMCG-IBD-TIFN_Taxman_100Pc_GG13-ZICPPI.txt	1828	35	Decreased	-0.441659	0.658736	0.545299	3.02427e-05	4.89657e-06	1.17807e-05	1.03867e-05	0.000147632	0	1.02436e-06	0	2.66729e-07	0	47	2	7	2	7	0	33	0	0	0.548985
PPI	Increased	k__Bacteria|p__Proteobacteria|c__Gammaproteobacteria|o__Enterobacteriales|f__Enterobacteriaceae|g__Shigella|s__boydii	-4.806990231058E-4;3.74988198781466E-4;1.56175759300351E-5	345;1174;309	41;139;63	0.204123777987848;0.219270322128154;0.982838984690594	0.705204500290218;0.642296556799924;0.992066303856681	-1.269890105944058;1.2284706992074232;0.021509801645131665	miSeqRuns_UMCG-IBD-TIFN_Taxman_100Pc_GG13-PPI.txt;miSeqRuns_UMCG-IBD-TIFN_Taxman_100Pc_GG13-Reducing_stomach_acid2.txt;miSeqRuns_UMCG-IBD-TIFN_Taxman_100Pc_GG13-ZICPPI.txt	1828	243	Increased	0.441652	0.658741	0.545299	9.48859e-06	2.73878e-05	7.43209e-06	2.33483e-05	2.21037e-05	5.40308e-05	6.61837e-06	3.88427e-06	0	0	298	28	39	11	46	15	213	2	31.6746	0.231405
PPI	Increased	k__Bacteria|p__Bacteroidetes|c__Bacteroidia|o__Bacteroidales|f__Porphyromonadaceae|g__Parabacteroides|s__distasonis	-0.00155468665535087;0.00174493155326824;0.00112594791668015	345;1174;309	291;1036;221	0.756490912433412;0.519953009809077;0.883028649992163	0.979701824923356;0.901274647957303;0.953273163528972	-0.3100921095050265;0.643417841159104;0.14713096412643575	miSeqRuns_UMCG-IBD-TIFN_Taxman_100Pc_GG13-PPI.txt;miSeqRuns_UMCG-IBD-TIFN_Taxman_100Pc_GG13-Reducing_stomach_acid2.txt;miSeqRuns_UMCG-IBD-TIFN_Taxman_100Pc_GG13-ZICPPI.txt	1828	1548	Increased	0.441409	0.658917	0.545299	0.00264728	0.00342226	0.00181594	0.00192534	0.00583085	0.0055262	0.00308481	0.00385282	1.16972e-05	0	1798	159	246	80	175	39	1377	40	0	0.844953
PPI	Decreased	k__Bacteria|p__Proteobacteria|c__Gammaproteobacteria|o__Enterobacteriales|f__Enterobacteriaceae|g__Enterobacter|s__aerogenes	-2.38832727675416E-5;-5.69047149586385E-5;3.77123789800422E-5	345;1174;309	1;17;2	0.543740840393958;0.560653146233001;0.478574105917498	0.92759973542807;0.926588433295259;0.826966136391118	-0.6071658690450874;-0.5818716373005315;0.7085977935895954	miSeqRuns_UMCG-IBD-TIFN_Taxman_100Pc_GG13-PPI.txt;miSeqRuns_UMCG-IBD-TIFN_Taxman_100Pc_GG13-Reducing_stomach_acid2.txt;miSeqRuns_UMCG-IBD-TIFN_Taxman_100Pc_GG13-ZICPPI.txt	1828	20	Decreased	-0.438747	0.660845	0.545299	5.97044e-07	3.7381e-07	8.58563e-07	5.52525e-07	6.0166e-08	3.96667e-07	7.19723e-08	0	0	0	20	2	1	1	1	1	18	0	0	0.601446
PPI	Increased	k__Bacteria|p__Proteobacteria|c__Gammaproteobacteria|o__Pseudomonadales|f__Moraxellaceae|g__Acinetobacter	1.62741878724676E-4;2.63492474346012E-5;-3.72982679896631E-4	345;1174;309	6;42;18	0.253247357707505;0.81381181571515;0.54682737546473	0.758526485805519;0.990483578093088;0.843389593796883	1.142497324055799;0.2355114206555048;-0.6025210201346798	miSeqRuns_UMCG-IBD-TIFN_Taxman_100Pc_GG13-PPI.txt;miSeqRuns_UMCG-IBD-TIFN_Taxman_100Pc_GG13-Reducing_stomach_acid2.txt;miSeqRuns_UMCG-IBD-TIFN_Taxman_100Pc_GG13-ZICPPI.txt	1828	66	Increased	0.437353	0.661855	0.545299	4.06913e-06	1.33424e-06	1.12702e-06	1.04737e-06	2.1366e-05	1.25833e-06	5.88927e-07	1.98039e-06	0	0	74	8	3	4	15	2	56	2	0	0.464748
PPI	Decreased	k__Bacteria|p__Firmicutes|c__Clostridia|o__Clostridiales|f__Lachnospiraceae|g__Roseburia	0.00259406598265017;-0.00483873545903723;0.0105524121562204	345;1174;309	342;1173;296	0.694717741504079;0.16807042837945;0.222119281957906	0.960141463341185;0.563410180964309;0.697740475977662	0.3924608384173254;-1.3784304469581041;1.2209121545659944	miSeqRuns_UMCG-IBD-TIFN_Taxman_100Pc_GG13-PPI.txt;miSeqRuns_UMCG-IBD-TIFN_Taxman_100Pc_GG13-Reducing_stomach_acid2.txt;miSeqRuns_UMCG-IBD-TIFN_Taxman_100Pc_GG13-ZICPPI.txt	1828	1811	Decreased	-0.432201	0.665596	0.546827	0.00650363	0.0079402	0.00566969	0.00530696	0.00994025	0.0124551	0.00673981	0.00774012	2.32005e-05	0	2111	204	286	98	232	55	1593	51	40.4394	0.186567
PPI	Increased	k__Bacteria|p__Proteobacteria|c__Gammaproteobacteria|o__Pasteurellales|f__Pasteurellaceae|[g__Haemophilus/g__Actinobacillus]	9.21269210120367E-6;6.13082616419614E-5;-1.47368709591982E-5	345;1174;309	11;44;10	0.958563187135058;0.582868038237758;0.934908128376677	0.994596915079819;0.937709638047118;0.97232389027117	0.05195671009379246;0.54920024218151;-0.08167126604787972	miSeqRuns_UMCG-IBD-TIFN_Taxman_100Pc_GG13-PPI.txt;miSeqRuns_UMCG-IBD-TIFN_Taxman_100Pc_GG13-Reducing_stomach_acid2.txt;miSeqRuns_UMCG-IBD-TIFN_Taxman_100Pc_GG13-ZICPPI.txt	1828	65	Increased	0.429119	0.667837	0.547119	1.29217e-06	7.80476e-07	1.11892e-06	9.06768e-07	1.9982e-06	5.205e-07	1.34782e-06	8.41176e-07	0	0	73	10	10	5	7	4	56	1	0	0.938546
PPI	Decreased	k__Bacteria|p__Proteobacteria|c__Gammaproteobacteria|o__Enterobacteriales|f__Enterobacteriaceae|g__Trabulsiella|s__farmeri	-1.24989964937093E-4;-8.91374348760764E-6;4.73382356138476E-5	345;1174;309	4;7;8	0.331507800782315;0.843849735150749;0.704241516771134	0.818523457013772;0.990483578093088;0.899789448914745	-0.9710812885266362;-0.19697163469336584;0.37960113688071184	miSeqRuns_UMCG-IBD-TIFN_Taxman_100Pc_GG13-PPI.txt;miSeqRuns_UMCG-IBD-TIFN_Taxman_100Pc_GG13-Reducing_stomach_acid2.txt;miSeqRuns_UMCG-IBD-TIFN_Taxman_100Pc_GG13-ZICPPI.txt	1828	19	Decreased	-0.423651	0.671821	0.547766	3.50026e-07	4.13238e-07	1.88465e-07	5.0303e-08	5.61411e-07	1.36333e-06	7.74713e-07	0	0	0	26	3	4	1	6	2	16	0	0	0.623001
PPI	Decreased	k__Bacteria|p__Actinobacteria|c__Actinobacteria|o__Bifidobacteriales|f__Bifidobacteriaceae|g__Bifidobacterium|s__thermacidophilum	-2.89381192626942E-5;3.1228067405585E-5;-1.34311965336781E-4	345;1174;309	2;20;3	0.576579555743531;0.633345222192514;0.171226732615927	0.935968509893371;0.960575763595147;0.638034808127503	-0.5583878674899695;0.47702373242693225;-1.3682727004875503	miSeqRuns_UMCG-IBD-TIFN_Taxman_100Pc_GG13-PPI.txt;miSeqRuns_UMCG-IBD-TIFN_Taxman_100Pc_GG13-Reducing_stomach_acid2.txt;miSeqRuns_UMCG-IBD-TIFN_Taxman_100Pc_GG13-ZICPPI.txt	1828	25	Decreased	-0.422851	0.672404	0.547766	3.43695e-07	2.65238e-07	3.56856e-07	5.62626e-07	5.47718e-07	0	1.24602e-07	0	0	0	28	2	2	2	3	0	23	0	10.423	0.32747
PPI	Decreased	k__Bacteria|p__Actinobacteria|c__Coriobacteriia|o__Coriobacteriales|f__Coriobacteriaceae|g__Atopobium|s__vaginae	-1.83378547139353E-4;-6.29572020085084E-5;1.12961076918089E-4	345;1174;309	7;21;9	0.41820159841745;0.672035875178342;0.501543000182971	0.869629952506614;0.972296236078077;0.832814430415186	-0.8095452282076352;-0.42335554360745203;0.6720639267569786	miSeqRuns_UMCG-IBD-TIFN_Taxman_100Pc_GG13-PPI.txt;miSeqRuns_UMCG-IBD-TIFN_Taxman_100Pc_GG13-Reducing_stomach_acid2.txt;miSeqRuns_UMCG-IBD-TIFN_Taxman_100Pc_GG13-ZICPPI.txt	1828	37	Decreased	-0.414653	0.678396	0.548417	2.03127e-06	4.81905e-07	2.07063e-06	2.9596e-07	1.33181e-06	1.19833e-06	2.46813e-06	0	1.11283e-06	0	48	3	7	1	7	2	34	0	0	0.572832
PPI	Decreased	k__Bacteria|p__Proteobacteria|c__Alphaproteobacteria|o__Rickettsiales|f__mitochondria|g__Vitis|s__vinifera	-5.53172157814065E-5;-1.94442783671547E-7;-4.43862545721329E-5	345;1174;309	3;51;7	0.502132251120264;0.999110236037152;0.769942736648944	0.905579551153308;0.999332591631272;0.918423496890931	-0.6711385808447689;-0.0011151539846396108;-0.29244980002990845	miSeqRuns_UMCG-IBD-TIFN_Taxman_100Pc_GG13-PPI.txt;miSeqRuns_UMCG-IBD-TIFN_Taxman_100Pc_GG13-Reducing_stomach_acid2.txt;miSeqRuns_UMCG-IBD-TIFN_Taxman_100Pc_GG13-ZICPPI.txt	1828	61	Decreased	-0.412696	0.67983	0.548417	2.01141e-06	1.58131e-06	2.67444e-06	2.80289e-06	1.08173e-06	9.09833e-07	3.20415e-07	0	0	0	64	5	3	3	5	2	56	0	0	0.832919
PPI	Decreased	k__Bacteria|p__Cyanobacteria|c__4C0d-2	-7.67742710815185E-4;-2.73826507097396E-4;0.0010028290931364	345;1174;309	109;476;61	0.366399264450634;0.814666931807384;0.679221431717326	0.851520078276335;0.990483578093088;0.892001553295908	-0.903238621086082;-0.23440969625014932;0.41352578925404965	miSeqRuns_UMCG-IBD-TIFN_Taxman_100Pc_GG13-PPI.txt;miSeqRuns_UMCG-IBD-TIFN_Taxman_100Pc_GG13-Reducing_stomach_acid2.txt;miSeqRuns_UMCG-IBD-TIFN_Taxman_100Pc_GG13-ZICPPI.txt	1828	646	Decreased	-0.410232	0.681636	0.548417	0.000293007	0.000293931	0.000341788	0.000221596	0.0002234	0.000573253	0.000169601	0.000105732	6.98623e-05	0	721	62	94	37	47	12	580	13	0	0.646133
PPI	Increased	k__Bacteria|p__Firmicutes|c__Bacilli|o__Bacillales|f__Staphylococcaceae|g__Staphylococcus|s__equorum	-4.13936471372254E-5;1.65414370895794E-4;-3.53519440123564E-5	345;1174;309	13;48;8	0.809048776454124;0.426220234580881;0.764932863313117	0.989823287883005;0.833923224843397;0.916973701654693	-0.2416533540485987;0.7956762500796458;-0.299009413121739	miSeqRuns_UMCG-IBD-TIFN_Taxman_100Pc_GG13-PPI.txt;miSeqRuns_UMCG-IBD-TIFN_Taxman_100Pc_GG13-Reducing_stomach_acid2.txt;miSeqRuns_UMCG-IBD-TIFN_Taxman_100Pc_GG13-ZICPPI.txt	1828	69	Increased	0.409733	0.682002	0.548417	2.61042e-06	4.23389e-06	3.42461e-06	8.13956e-06	6.23651e-07	7.78333e-07	1.23865e-06	7.17647e-07	6.92809e-05	1	75	8	10	5	6	2	59	1	0	0.73601
PPI	Decreased	k__Bacteria|p__Cyanobacteria|c__4C0d-2|o__YS2	-7.67742710815184E-4;-2.71881139033318E-4;0.0010028290931364	345;1174;309	109;475;61	0.366399264450634;0.816017680917519;0.679221431717328	0.851520078276335;0.990483578093088;0.892001553295908	-0.903238621086082;-0.23266998137493433;0.41352578925404687	miSeqRuns_UMCG-IBD-TIFN_Taxman_100Pc_GG13-PPI.txt;miSeqRuns_UMCG-IBD-TIFN_Taxman_100Pc_GG13-Reducing_stomach_acid2.txt;miSeqRuns_UMCG-IBD-TIFN_Taxman_100Pc_GG13-ZICPPI.txt	1828	645	Decreased	-0.408838	0.682658	0.548417	0.000292987	0.000293931	0.000341758	0.000221596	0.0002234	0.000573253	0.000169601	0.000105732	8.50334e-07	0	720	62	94	37	47	12	579	13	0	0.646026
PPI	Decreased	k__Bacteria|p__Firmicutes|c__Clostridia|o__Clostridiales|f__Lachnospiraceae|g__Blautia|s__obeum	-0.00538165602629961;0.00112710795288068;-0.00248777158644195	345;1174;309	336;1149;259	0.22098056903759;0.696433166577128;0.651586475994625	0.72405301043252;0.977122560270568;0.883649297502708	-1.2239248744458822;0.39013980988463054;-0.45155932779173447	miSeqRuns_UMCG-IBD-TIFN_Taxman_100Pc_GG13-PPI.txt;miSeqRuns_UMCG-IBD-TIFN_Taxman_100Pc_GG13-Reducing_stomach_acid2.txt;miSeqRuns_UMCG-IBD-TIFN_Taxman_100Pc_GG13-ZICPPI.txt	1828	1744	Decreased	-0.404711	0.68569	0.549331	0.00326708	0.0033361	0.00325648	0.00343371	0.00278133	0.00304838	0.00371155	0.00348512	0.000282151	0	2027	193	282	96	205	48	1540	49	0	0.429489
PPI	Decreased	k__Bacteria|p__Firmicutes|c__Clostridia|o__Clostridiales|f__Veillonellaceae	-0.0048983714129331;-0.00190604828968539;-0.00282519904136485	345;1174;309	345;1172;309	0.704616630078237;0.846497303748163;0.842531915253639	0.963407262376535;0.990483578093088;0.945758107012719	-0.3790959279090914;-0.1935895213231169;-0.1986559100040304	miSeqRuns_UMCG-IBD-TIFN_Taxman_100Pc_GG13-PPI.txt;miSeqRuns_UMCG-IBD-TIFN_Taxman_100Pc_GG13-Reducing_stomach_acid2.txt;miSeqRuns_UMCG-IBD-TIFN_Taxman_100Pc_GG13-ZICPPI.txt	1828	1826	Decreased	-0.401508	0.688046	0.549699	0.0298701	0.0289319	0.0286464	0.0247718	0.0435597	0.0443619	0.0230063	0.0188545	0	0	2134	209	289	98	241	60	1604	51	0	0.970714
PPI	Decreased	k__Bacteria|p__Proteobacteria|c__Deltaproteobacteria|o__Desulfovibrionales|f__Desulfovibrionaceae|g__Bilophila	-4.7359178177134E-4;7.59085122052385E-5;-0.0027685146527765	345;1174;309	261;877;157	0.870605402478745;0.961256496228623;0.384893339084718	0.991109715557945;0.994555003200321;0.792825113551353	-0.16288954536680791;0.04857687882884965;-0.868915521681937	miSeqRuns_UMCG-IBD-TIFN_Taxman_100Pc_GG13-PPI.txt;miSeqRuns_UMCG-IBD-TIFN_Taxman_100Pc_GG13-Reducing_stomach_acid2.txt;miSeqRuns_UMCG-IBD-TIFN_Taxman_100Pc_GG13-ZICPPI.txt	1828	1295	Decreased	-0.389082	0.697215	0.555495	0.000615589	0.000603802	0.000508195	0.000392394	0.00084286	0.000578132	0.000825541	0.00104438	0	0	1504	128	224	69	124	27	1156	32	0	0.728869
PPI	Increased	k__Bacteria|p__Firmicutes|c__Clostridia|o__Clostridiales|f__Veillonellaceae|g__Selenomonas	1.0176309009452E-4;-8.47331776604604E-5;4.71192873896718E-4	345;1174;309	4;14;7	0.245277310628571;0.228481126632607;0.0398575516811847	0.753955871094722;0.655605362345549;0.422860392077677	1.1618969883127033;-1.2042806406935498;2.0552221600484857	miSeqRuns_UMCG-IBD-TIFN_Taxman_100Pc_GG13-PPI.txt;miSeqRuns_UMCG-IBD-TIFN_Taxman_100Pc_GG13-Reducing_stomach_acid2.txt;miSeqRuns_UMCG-IBD-TIFN_Taxman_100Pc_GG13-ZICPPI.txt	1828	25	Increased	0.384649	0.700498	0.556581	6.62717e-07	1.62266e-06	4.68808e-07	0	2.00266e-06	5.21932e-06	2.66609e-07	5.41176e-07	0	0	26	6	3	0	3	5	20	1	70.9145	0.0321244
PPI	Decreased	k__Bacteria|p__Proteobacteria|c__Gammaproteobacteria|o__Enterobacteriales|f__Enterobacteriaceae|[g__Klebsiella/g__Kluyvera]	-5.83199353472994E-5;-1.06118859883553E-4;5.0693219717307E-4	345;1174;309	6;12;8	0.738206217367252;0.275002644522475;0.116487202623687	0.973371864020578;0.69956936278688;0.580550167995014	-0.3342297220763419;-1.0916143533980287;1.5696901983723275	miSeqRuns_UMCG-IBD-TIFN_Taxman_100Pc_GG13-PPI.txt;miSeqRuns_UMCG-IBD-TIFN_Taxman_100Pc_GG13-Reducing_stomach_acid2.txt;miSeqRuns_UMCG-IBD-TIFN_Taxman_100Pc_GG13-ZICPPI.txt	1828	26	Decreased	-0.374648	0.707922	0.558475	1.01181e-06	5.6606e-06	8.9976e-07	0	1.23019e-06	1.89288e-05	1.24649e-06	1.03922e-06	0	0	30	4	5	0	4	3	21	1	44.8564	0.163091
PPI	Decreased	k__Bacteria|p__Bacteroidetes|c__Bacteroidia|o__Bacteroidales	-0.0139309719959776;0.00185649332448272;-0.0117022433088314	345;1174;309	344;1173;309	0.533010719338147;0.889414046625674;0.605940785834203	0.922325394612758;0.990483578093088;0.860868224907239	-0.6234167109161449;0.13904568705472278;-0.5158763315207382	miSeqRuns_UMCG-IBD-TIFN_Taxman_100Pc_GG13-PPI.txt;miSeqRuns_UMCG-IBD-TIFN_Taxman_100Pc_GG13-Reducing_stomach_acid2.txt;miSeqRuns_UMCG-IBD-TIFN_Taxman_100Pc_GG13-ZICPPI.txt	1828	1826	Decreased	-0.3715	0.710265	0.558475	0.0892528	0.0934561	0.0760164	0.0733282	0.143267	0.135087	0.0934457	0.0835505	0.0384958	0	2132	210	288	99	241	60	1603	51	0	0.76487
PPI	Decreased	k__Bacteria|p__Bacteroidetes	-0.0139310441123742;0.00186096855188632;-0.0117099020609878	345;1174;309	344;1173;309	0.533009247441878;0.88914887353615;0.605696083316204	0.922325394612758;0.990483578093088;0.860868224907239	-0.6234189513461122;0.13938126838233147;-0.5162267013321638	miSeqRuns_UMCG-IBD-TIFN_Taxman_100Pc_GG13-PPI.txt;miSeqRuns_UMCG-IBD-TIFN_Taxman_100Pc_GG13-Reducing_stomach_acid2.txt;miSeqRuns_UMCG-IBD-TIFN_Taxman_100Pc_GG13-ZICPPI.txt	1828	1826	Decreased	-0.371376	0.710358	0.558475	0.0892534	0.0934571	0.076017	0.0733301	0.143268	0.135087	0.0934458	0.0835507	0.0431802	0	2132	210	288	99	241	60	1603	51	0	0.76466
PPI	Increased	k__Bacteria|p__Firmicutes|c__Clostridia|o__Clostridiales|f__Tissierellaceae|g__WAL_1855D	-4.03451376854307E-5;3.01529701332159E-4;-5.35576229941444E-4	345;1174;309	52;265;31	0.924428071371993;0.360626594372112;0.429326192413689	0.991109715557945;0.800890889960059;0.8064456277437	-0.09485742818420079;0.9141717716832176;-0.7903452068418262	miSeqRuns_UMCG-IBD-TIFN_Taxman_100Pc_GG13-PPI.txt;miSeqRuns_UMCG-IBD-TIFN_Taxman_100Pc_GG13-Reducing_stomach_acid2.txt;miSeqRuns_UMCG-IBD-TIFN_Taxman_100Pc_GG13-ZICPPI.txt	1828	348	Increased	0.366459	0.714023	0.558475	2.25379e-05	1.02414e-05	2.55351e-05	1.5897e-05	2.60863e-05	3.48433e-06	8.4301e-06	7.21231e-06	0	0	388	32	47	23	26	4	315	5	0	0.512974
PPI	Decreased	k__Bacteria|p__Lentisphaerae|c__Lentisphaeria	-0.00143960671061029;-1.68295611402159E-4;7.22394529980433E-4	345;1174;309	52;202;21	0.217659773420839;0.758153717072256;0.310464439469592	0.723086239296913;0.987359345673806;0.765646554522569	-1.2327748596559998;-0.30790618798515285;1.0142479797904342	miSeqRuns_UMCG-IBD-TIFN_Taxman_100Pc_GG13-PPI.txt;miSeqRuns_UMCG-IBD-TIFN_Taxman_100Pc_GG13-Reducing_stomach_acid2.txt;miSeqRuns_UMCG-IBD-TIFN_Taxman_100Pc_GG13-ZICPPI.txt	1828	275	Decreased	-0.365311	0.714879	0.558475	3.04149e-05	3.51608e-05	2.8681e-05	2.8707e-05	1.14257e-05	7.1636e-05	5.26997e-05	4.77667e-06	0	0	320	20	49	14	17	4	254	2	20.312	0.285106
PPI	Increased	k__Bacteria|p__Cyanobacteria|c__Chloroplast	1.16133173091127E-4;3.83418395280655E-4;-2.68220692363395E-4	345;1174;309	72;569;104	0.753172651490302;0.601479388456342;0.641799831215482	0.979597523883439;0.947578125123682;0.880600550515624	0.3144587365723164;0.5222742596636809;-0.46518381070336645	miSeqRuns_UMCG-IBD-TIFN_Taxman_100Pc_GG13-PPI.txt;miSeqRuns_UMCG-IBD-TIFN_Taxman_100Pc_GG13-Reducing_stomach_acid2.txt;miSeqRuns_UMCG-IBD-TIFN_Taxman_100Pc_GG13-ZICPPI.txt	1828	745	Increased	0.363902	0.715931	0.558475	0.000112579	0.000115718	0.000131742	0.000158627	0.000145504	0.000116962	1.38404e-05	3.09615e-05	0.00103382	1	803	80	60	48	81	22	662	10	0	0.796273
PPI	Decreased	k__Bacteria|p__Proteobacteria|c__Gammaproteobacteria|o__Pseudomonadales	-4.63568579467316E-5;-5.02284685041975E-4;1.08837170517197E-4	345;1174;309	27;134;72	0.848361451611732;0.624753125905313;0.784468882829521	0.991109715557945;0.958196606344893;0.924611464430566	-0.1912095119975092;-0.4891251091250931;0.2735000123731858	miSeqRuns_UMCG-IBD-TIFN_Taxman_100Pc_GG13-PPI.txt;miSeqRuns_UMCG-IBD-TIFN_Taxman_100Pc_GG13-Reducing_stomach_acid2.txt;miSeqRuns_UMCG-IBD-TIFN_Taxman_100Pc_GG13-ZICPPI.txt	1828	233	Decreased	-0.362602	0.716902	0.558475	6.93562e-05	1.78021e-05	9.57405e-05	7.29334e-06	3.18316e-05	4.85155e-05	2.5059e-06	2.06784e-06	0	0	281	29	23	11	56	15	202	3	0	0.896226
PPI	Decreased	k__Bacteria|p__Firmicutes|c__Bacilli|o__Bacillales|f__Paenibacillaceae	-5.11381163118791E-5;1.4384309211074E-5;-2.13504106592514E-5	345;1174;309	5;19;1	0.422368561216997;0.836741631571632;0.666234935826257	0.869629952506614;0.990483578093088;0.884042511000225	-0.8023188154509299;0.2060630878856362;-0.43132106489435923	miSeqRuns_UMCG-IBD-TIFN_Taxman_100Pc_GG13-PPI.txt;miSeqRuns_UMCG-IBD-TIFN_Taxman_100Pc_GG13-Reducing_stomach_acid2.txt;miSeqRuns_UMCG-IBD-TIFN_Taxman_100Pc_GG13-ZICPPI.txt	1828	25	Decreased	-0.360749	0.718287	0.558475	3.49611e-07	1.33286e-07	4.36127e-07	2.82727e-07	1.39419e-07	0	2.0308e-07	0	5.16517e-06	1	29	2	5	2	1	0	23	0	0	0.690018
PPI	Decreased	k__Bacteria|p__Lentisphaerae|c__Lentisphaeria|o__Victivallales|f__Victivallaceae	-0.00143291430514774;-1.50344157852885E-4;7.22394529980433E-4	345;1174;309	51;202;21	0.205689707242456;0.782190329968543;0.310464439469592	0.705204500290218;0.990483578093088;0.765646554522569	-1.2655068142073183;-0.27646579223696177;1.0142479797904342	miSeqRuns_UMCG-IBD-TIFN_Taxman_100Pc_GG13-PPI.txt;miSeqRuns_UMCG-IBD-TIFN_Taxman_100Pc_GG13-Reducing_stomach_acid2.txt;miSeqRuns_UMCG-IBD-TIFN_Taxman_100Pc_GG13-ZICPPI.txt	1828	274	Decreased	-0.354335	0.723088	0.559718	3.02078e-05	3.51608e-05	2.83792e-05	2.8707e-05	1.14257e-05	7.1636e-05	5.26719e-05	4.77667e-06	0	0	318	20	48	14	17	4	253	2	22.5133	0.275121
PPI	Decreased	k__Bacteria|p__Firmicutes|c__Erysipelotrichi|o__Erysipelotrichales|f__Erysipelotrichaceae|g__Clostridium|s__saccharogumia	-4.50480068402875E-4;-0.00103006414753114;7.50230680931796E-4	345;1174;309	69;240;28	0.778036142752758;0.43858837561425;0.34013988507897	0.98157274480092;0.842743006751822;0.775637250404097	-0.2818791952204028;-0.7745791600496;0.9538888953461429	miSeqRuns_UMCG-IBD-TIFN_Taxman_100Pc_GG13-PPI.txt;miSeqRuns_UMCG-IBD-TIFN_Taxman_100Pc_GG13-Reducing_stomach_acid2.txt;miSeqRuns_UMCG-IBD-TIFN_Taxman_100Pc_GG13-ZICPPI.txt	1828	337	Decreased	-0.351017	0.725576	0.559718	0.000148424	6.7871e-05	0.000183509	9.51393e-05	2.42926e-05	4.10216e-05	0.000121431	4.65261e-05	0	0	370	38	57	22	19	7	294	9	0	0.480437
PPI	Decreased	k__Bacteria|p__Proteobacteria|c__Alphaproteobacteria|o__Rickettsiales|f__mitochondria|[g__Lotus/g__Millettia]	-9.55373405260154E-5;1.71051330729675E-4	1174;309	17;4	0.396433438667057;0.376568656714605	0.821632008854607;0.790417627573288	-0.8480081378376277;0.8842363184474178	miSeqRuns_UMCG-IBD-TIFN_Taxman_100Pc_GG13-Reducing_stomach_acid2.txt;miSeqRuns_UMCG-IBD-TIFN_Taxman_100Pc_GG13-ZICPPI.txt	1483	21	Decreased	-0.350883	0.725676	0.559718	9.80386e-07	1.10908e-06	1.20097e-06	0	1.17208e-06	3.88178e-06	0	0	0	0	21	2	0	0	2	2	19	0	27.4243	0.240464
PPI	Decreased	k__Bacteria|p__Actinobacteria|c__Coriobacteriia|o__Coriobacteriales|f__Coriobacteriaceae|g__Collinsella|s__aerofaciens	0.0163959615283452;-0.0108472759873117;-0.00215859414891026	345;1174;309	323;1050;234	0.165552137707406;0.275636389029232;0.852408380145771	0.670917702102072;0.700332314565242;0.947681147887396	1.3866381218985446;-1.0901742611983163;-0.1860463928499645	miSeqRuns_UMCG-IBD-TIFN_Taxman_100Pc_GG13-PPI.txt;miSeqRuns_UMCG-IBD-TIFN_Taxman_100Pc_GG13-Reducing_stomach_acid2.txt;miSeqRuns_UMCG-IBD-TIFN_Taxman_100Pc_GG13-ZICPPI.txt	1828	1607	Decreased	-0.347751	0.728027	0.560042	0.0184039	0.0167155	0.0205279	0.0185099	0.0116378	0.0118057	0.0161452	0.0190084	0.000345923	0	1864	185	271	90	181	48	1412	47	33.8827	0.220366
PPI	Increased	k__Bacteria|p__Bacteroidetes|c__Bacteroidia|o__Bacteroidales|f__Paraprevotellaceae|g__Prevotella	0.00245303617920284;0.00118337366549645;-0.00234312120672605	345;1174;309	57;186;27	0.641107643481655;0.661918537667904;0.605884362623246	0.946840854127298;0.970177691035165;0.860868224907239	0.4661506879908624;0.4372658789496835;-0.515957113749545	miSeqRuns_UMCG-IBD-TIFN_Taxman_100Pc_GG13-PPI.txt;miSeqRuns_UMCG-IBD-TIFN_Taxman_100Pc_GG13-Reducing_stomach_acid2.txt;miSeqRuns_UMCG-IBD-TIFN_Taxman_100Pc_GG13-ZICPPI.txt	1828	270	Increased	0.340801	0.733253	0.56257	0.000818982	0.000829791	0.000664394	0.000900419	0.00110554	0.00033202	0.00115504	0.0012783	0.00370855	1	302	32	45	16	21	5	236	11	0	0.756327
PPI	Increased	k__Bacteria|p__Firmicutes|c__Clostridia|o__Clostridiales|f__Ruminococcaceae|[g__Ruminococcus/g__Oscillospira]	-0.00693709791717788;0.00280046753370077;0.00125343374280409	345;1174;309	49;216;13	0.189471030446029;0.360245299581209;0.675639336987283	0.70027595063172;0.80082891580893;0.891756535380185	-1.3121455473553838;0.9148977724610796;0.41842099770627467	miSeqRuns_UMCG-IBD-TIFN_Taxman_100Pc_GG13-PPI.txt;miSeqRuns_UMCG-IBD-TIFN_Taxman_100Pc_GG13-Reducing_stomach_acid2.txt;miSeqRuns_UMCG-IBD-TIFN_Taxman_100Pc_GG13-ZICPPI.txt	1828	278	Increased	0.335186	0.737485	0.562979	0.00086213	0.000602427	0.00086215	0.000801945	0.00030476	0.000775831	0.00132685	1.11216e-05	0	0	302	28	44	20	9	4	249	4	23.7075	0.269619
PPI	Decreased	k__Bacteria|p__Actinobacteria|c__Actinobacteria|o__Actinomycetales|f__Micrococcaceae|g__Kocuria	-6.59381360974303E-5;-2.04153645197868E-5;6.46496720570912E-5	345;1174;309	5;30;5	0.333669212625061;0.852352102659773;0.568927643235604	0.818523457013772;0.990483578093088;0.849463846267896	-0.9667496251460145;-0.18611815801711593;0.5696315231736765	miSeqRuns_UMCG-IBD-TIFN_Taxman_100Pc_GG13-PPI.txt;miSeqRuns_UMCG-IBD-TIFN_Taxman_100Pc_GG13-Reducing_stomach_acid2.txt;miSeqRuns_UMCG-IBD-TIFN_Taxman_100Pc_GG13-ZICPPI.txt	1828	40	Decreased	-0.334941	0.737669	0.562979	8.48293e-07	5.3119e-07	1.0828e-06	7.00505e-07	5.53112e-07	7.03333e-07	2.22145e-07	0	0.000118249	1	46	3	5	2	4	1	37	0	0	0.553901
PPI	Increased	k__Bacteria|p__Firmicutes|c__Clostridia|o__Clostridiales|[f__Clostridiaceae/f__[Mogibacteriaceae]]	0.00119170147754879;0.0010479556647487;-0.00203775992573741	345;1174;309	256;799;194	0.645223394304323;0.648338261558089;0.545584497149018	0.947244002373031;0.967871433413119;0.843389593796883	0.4604079988946607;0.456071920092298;-0.604389827736878	miSeqRuns_UMCG-IBD-TIFN_Taxman_100Pc_GG13-PPI.txt;miSeqRuns_UMCG-IBD-TIFN_Taxman_100Pc_GG13-Reducing_stomach_acid2.txt;miSeqRuns_UMCG-IBD-TIFN_Taxman_100Pc_GG13-ZICPPI.txt	1828	1249	Increased	0.317019	0.751229	0.571021	0.000890041	0.0012669	0.000940009	0.00142255	0.000903683	0.00110787	0.0006928	0.00115186	1.71728e-06	0	1456	146	211	67	151	38	1094	41	0	0.710077
PPI	Increased	k__Bacteria|p__Proteobacteria|c__Gammaproteobacteria|o__Aeromonadales|f__Succinivibrionaceae|g__Succinivibrio	-8.62963660830722E-6;-2.77617376756577E-4;0.00587981475848353	345;1174;309	5;39;14	0.99387098844735;0.863019193631535;0.268147428600045	0.999808023053732;0.990483578093088;0.740086902936124	-0.007681652372250525;-0.17253214317953303;1.107338907442401	miSeqRuns_UMCG-IBD-TIFN_Taxman_100Pc_GG13-PPI.txt;miSeqRuns_UMCG-IBD-TIFN_Taxman_100Pc_GG13-Reducing_stomach_acid2.txt;miSeqRuns_UMCG-IBD-TIFN_Taxman_100Pc_GG13-ZICPPI.txt	1828	58	Increased	0.313669	0.753772	0.571021	0.000304226	0.000668598	0.000226633	0.000161191	0.000952115	0.00207413	5.25678e-05	0	0	0	66	6	4	3	11	3	51	0	0	0.56056
PPI	Decreased	k__Bacteria|p__Proteobacteria|c__Gammaproteobacteria|o__Enterobacteriales|f__Enterobacteriaceae|g__Enterobacter|s__amnigenus	-1.58316337883954E-4;-7.0500716888243E-5;2.89162352036407E-4	345;1174;309	3;16;4	0.193384040430979;0.554793268311376;0.0776884245075994	0.700871400168005;0.923247736267197;0.52429860856562	-1.3006331908508921;-0.5905928327401245;1.7642587558294969	miSeqRuns_UMCG-IBD-TIFN_Taxman_100Pc_GG13-PPI.txt;miSeqRuns_UMCG-IBD-TIFN_Taxman_100Pc_GG13-Reducing_stomach_acid2.txt;miSeqRuns_UMCG-IBD-TIFN_Taxman_100Pc_GG13-ZICPPI.txt	1828	23	Decreased	-0.312974	0.7543	0.571021	1.09838e-06	1.21667e-06	1.31803e-06	3.51515e-07	6.02145e-07	3.67833e-06	6.9517e-07	0	0	0	23	4	3	1	1	3	19	0	60.436	0.0798543
PPI	Decreased	k__Bacteria|p__Bacteroidetes|c__Bacteroidia|o__Bacteroidales|f__Barnesiellaceae|g__Barnesiella	-9.41581887743218E-4;4.48860078167877E-4;-0.00235694338046921	345;1174;309	117;346;82	0.044988585618915;0.238268635770457;0.351444073725202	0.393545010647705;0.664730494701743;0.780827943398774	-2.0047611693373124;1.1793253800478607;-0.9317919150565525	miSeqRuns_UMCG-IBD-TIFN_Taxman_100Pc_GG13-PPI.txt;miSeqRuns_UMCG-IBD-TIFN_Taxman_100Pc_GG13-Reducing_stomach_acid2.txt;miSeqRuns_UMCG-IBD-TIFN_Taxman_100Pc_GG13-ZICPPI.txt	1828	545	Decreased	-0.308926	0.757378	0.571021	0.00018765	0.000164146	0.000128102	0.000234352	0.000349368	0.000145415	0.000274295	4.99009e-05	0	0	654	57	104	32	66	14	484	11	67.6516	0.0454411
PPI	Decreased	k__Bacteria|p__Proteobacteria|c__Alphaproteobacteria|o__Rickettsiales	4.02068336870525E-4;-2.88988881356264E-4;-4.76479053108298E-4	345;1174;309	30;314;62	0.175762900657287;0.442934095797477;0.493863983329117	0.686906367495702;0.846019449412482;0.832814430415186	1.3539168702093036;-0.7672479717370698;-0.6841760824358756	miSeqRuns_UMCG-IBD-TIFN_Taxman_100Pc_GG13-PPI.txt;miSeqRuns_UMCG-IBD-TIFN_Taxman_100Pc_GG13-Reducing_stomach_acid2.txt;miSeqRuns_UMCG-IBD-TIFN_Taxman_100Pc_GG13-ZICPPI.txt	1828	406	Decreased	-0.307976	0.7581	0.571021	2.13504e-05	1.83339e-05	2.4194e-05	2.175e-05	3.07018e-05	2.14183e-05	2.97467e-06	8.07367e-06	0	0	443	39	25	21	50	13	368	5	28.4438	0.247213
PPI	Increased	k__Bacteria|p__Firmicutes|c__Erysipelotrichi|o__Erysipelotrichales|f__Erysipelotrichaceae|g__cc_115	-0.00138874330184891;0.00183909103057151;-0.00232692630435906	345;1174;309	250;868;202	0.51352262466615;0.26872391962203;0.460434153051884	0.914666368577576;0.696048192222234;0.820464276267387	-0.6533624748057897;1.1060060064198804;-0.7381321427657698	miSeqRuns_UMCG-IBD-TIFN_Taxman_100Pc_GG13-PPI.txt;miSeqRuns_UMCG-IBD-TIFN_Taxman_100Pc_GG13-Reducing_stomach_acid2.txt;miSeqRuns_UMCG-IBD-TIFN_Taxman_100Pc_GG13-ZICPPI.txt	1828	1320	Increased	0.299028	0.764918	0.571021	0.000659938	0.000630797	0.000576171	0.000729977	0.0011492	0.0007359	0.000563523	0.00031462	0	0	1551	140	216	69	160	39	1175	32	5.01307	0.348968
PPI	Decreased	k__Bacteria|p__Firmicutes|c__Clostridia|o__Clostridiales|f__Peptostreptococcaceae|g__Clostridium|s__difficile	9.13138108497906E-4;-6.74030081641639E-4;-2.06106950030094E-4	345;1174;309	77;397;75	0.0149461112983453;0.143598037685569;0.657980699572236	0.251022133974091;0.520511539189228;0.883666329889024	2.4336821970805786;-1.4625226664262443;-0.4427028239738643	miSeqRuns_UMCG-IBD-TIFN_Taxman_100Pc_GG13-PPI.txt;miSeqRuns_UMCG-IBD-TIFN_Taxman_100Pc_GG13-Reducing_stomach_acid2.txt;miSeqRuns_UMCG-IBD-TIFN_Taxman_100Pc_GG13-ZICPPI.txt	1828	549	Decreased	-0.296801	0.766618	0.571021	3.45165e-05	3.04108e-05	2.96538e-05	2.5783e-05	8.38315e-05	4.8789e-05	1.14801e-05	1.77726e-05	3.49766e-07	0	609	55	61	26	58	14	490	15	75.5192	0.0168259
PPI	Decreased	k__Bacteria|p__Firmicutes|c__Clostridia|o__Clostridiales|f__Tissierellaceae|g__1-68	-7.49800395168356E-5;-1.00118440427226E-4;1.76269183822861E-4	345;1174;309	8;89;11	0.556284916592025;0.665337236988085;0.454290602401312	0.928462951801346;0.970177691035165;0.818582166055854	-0.5883685889715645;-0.4325561702227248;0.748281132671587	miSeqRuns_UMCG-IBD-TIFN_Taxman_100Pc_GG13-PPI.txt;miSeqRuns_UMCG-IBD-TIFN_Taxman_100Pc_GG13-Reducing_stomach_acid2.txt;miSeqRuns_UMCG-IBD-TIFN_Taxman_100Pc_GG13-ZICPPI.txt	1828	108	Decreased	-0.294604	0.768296	0.571021	3.89744e-06	2.46864e-06	5.05291e-06	3.62897e-06	2.49685e-06	2.65243e-06	7.67346e-07	0	0	0	114	10	8	7	8	3	98	0	0	0.604588
PPI	Decreased	k__Bacteria|p__Firmicutes|c__Bacilli|o__Lactobacillales|f__Leuconostocaceae|g__Fructobacillus	-3.84923985811917E-5;4.36634613381955E-6;-2.64450707232927E-5	345;1174;309	3;18;2	0.664284102842939;0.962385611437518;0.738940847707523	0.95408468998266;0.994555003200321;0.906076605742046	-0.43400597409367153;0.04716012041093822;-0.3332562676443064	miSeqRuns_UMCG-IBD-TIFN_Taxman_100Pc_GG13-PPI.txt;miSeqRuns_UMCG-IBD-TIFN_Taxman_100Pc_GG13-Reducing_stomach_acid2.txt;miSeqRuns_UMCG-IBD-TIFN_Taxman_100Pc_GG13-ZICPPI.txt	1828	23	Decreased	-0.287768	0.773525	0.571021	6.13481e-07	3.79524e-07	7.38732e-07	8.05051e-07	3.49793e-07	0	3.67474e-07	0	0	0	26	2	3	2	2	0	21	0	0	0.896356
PPI	Increased	k__Bacteria|p__Firmicutes|c__Erysipelotrichi|o__Erysipelotrichales|f__Erysipelotrichaceae|g__Clostridium|s__spiroforme	-3.56229481391235E-4;5.0364177753732E-4;-1.44841058611062E-4	345;1174;309	116;440;119	0.548706451412488;0.438514957966463;0.859251787004964	0.928384473225302;0.842743006751822;0.950165276250842	-0.5996996052047011;0.7747033721061234;-0.1773266905075736	miSeqRuns_UMCG-IBD-TIFN_Taxman_100Pc_GG13-PPI.txt;miSeqRuns_UMCG-IBD-TIFN_Taxman_100Pc_GG13-Reducing_stomach_acid2.txt;miSeqRuns_UMCG-IBD-TIFN_Taxman_100Pc_GG13-ZICPPI.txt	1828	675	Increased	0.287408	0.7738	0.571021	5.34534e-05	7.1706e-05	6.15878e-05	7.94241e-05	5.35726e-05	0.000106193	2.30962e-05	1.61509e-05	0	0	792	71	99	36	95	20	598	15	0	0.634877
PPI	Increased	k__Bacteria|p__Proteobacteria|c__Gammaproteobacteria|o__Enterobacteriales|f__Enterobacteriaceae|g__Enterobacter	-5.67090441005634E-4;-6.64732496339373E-5;0.0019149390265801	345;1174;309	44;82;35	0.57681153743143;0.914968112537534;0.134598116075083	0.935968509893371;0.990483578093088;0.595864668730622	-0.5580481027446831;-0.10677420418675539;1.4962131606473297	miSeqRuns_UMCG-IBD-TIFN_Taxman_100Pc_GG13-PPI.txt;miSeqRuns_UMCG-IBD-TIFN_Taxman_100Pc_GG13-Reducing_stomach_acid2.txt;miSeqRuns_UMCG-IBD-TIFN_Taxman_100Pc_GG13-ZICPPI.txt	1828	161	Increased	0.287153	0.773995	0.571021	3.97313e-05	6.88461e-05	3.60245e-05	1.60788e-05	4.78851e-05	0.000194637	4.67201e-05	2.32875e-05	0	0	188	29	35	12	24	9	129	8	19.3228	0.289527
PPI	Decreased	k__Bacteria|p__Bacteroidetes|c__Bacteroidia|o__Bacteroidales|f__Rikenellaceae|g__Alistipes|s__onderdonkii	-0.00468390550534878;0.00180187046563731;-0.00424774025960478	345;1174;309	244;883;170	0.15662153600966;0.392013679630467;0.386716645258526	0.661489904974496;0.821632008854607;0.792924694307609	-1.4165260727778393;0.8559712545986962;-0.865587076418739	miSeqRuns_UMCG-IBD-TIFN_Taxman_100Pc_GG13-PPI.txt;miSeqRuns_UMCG-IBD-TIFN_Taxman_100Pc_GG13-Reducing_stomach_acid2.txt;miSeqRuns_UMCG-IBD-TIFN_Taxman_100Pc_GG13-ZICPPI.txt	1828	1297	Decreased	-0.285292	0.77542	0.571021	0.00155671	0.00118523	0.00132823	0.00110448	0.00253979	0.00141011	0.00158678	0.0010774	0	0	1520	126	216	73	139	26	1165	27	41.2987	0.182038
PPI	Increased	k__Bacteria|p__Firmicutes|c__Bacilli|o__Lactobacillales|f__Carnobacteriaceae|g__Carnobacterium	-3.47543808489333E-6;-6.94646578454966E-5;1.97095359158912E-4	345;1174;309	6;23;3	0.972623301812915;0.588282257239335;0.074526565266593	0.994945803821736;0.941022125296389;0.516732859404705	-0.03431833807520956;-0.5413269365796141;1.7833670993217394	miSeqRuns_UMCG-IBD-TIFN_Taxman_100Pc_GG13-PPI.txt;miSeqRuns_UMCG-IBD-TIFN_Taxman_100Pc_GG13-Reducing_stomach_acid2.txt;miSeqRuns_UMCG-IBD-TIFN_Taxman_100Pc_GG13-ZICPPI.txt	1828	32	Increased	0.284491	0.776034	0.571021	1.13258e-06	8.03333e-07	1.50828e-06	6.21212e-07	3.45228e-07	1.35e-06	3.91696e-07	5.13725e-07	5.59541e-06	1	33	5	5	2	1	2	27	1	41.0669	0.183262
PPI	Decreased	k__Bacteria|p__Firmicutes|c__Clostridia|o__Clostridiales|f__Lachnospiraceae|[g__Dorea/g__Roseburia]	-2.59888155389773E-4;4.69185951372883E-5;-3.20887625635573E-5	345;1174;309	18;33;5	0.232679121314344;0.632599710195776;0.719848398976988	0.733152070053418;0.960575763595147;0.902538253212687	-1.193485924784409;0.47807094617700874;-0.35866141202441376	miSeqRuns_UMCG-IBD-TIFN_Taxman_100Pc_GG13-PPI.txt;miSeqRuns_UMCG-IBD-TIFN_Taxman_100Pc_GG13-Reducing_stomach_acid2.txt;miSeqRuns_UMCG-IBD-TIFN_Taxman_100Pc_GG13-ZICPPI.txt	1828	56	Decreased	-0.282826	0.777311	0.571021	9.50525e-07	6.1419e-07	8.332e-07	9.60404e-07	2.33112e-07	2.06667e-07	1.9852e-06	4.21569e-07	0	0	67	6	16	4	3	1	48	1	0	0.427071
PPI	Increased	k__Bacteria|p__Firmicutes|c__Erysipelotrichi|o__Erysipelotrichales|f__Erysipelotrichaceae|g__Holdemania	-0.00109823342145375;7.58137434382285E-4;-5.18618304311988E-4	345;1174;309	267;945;187	0.326909443593226;0.282509654687167;0.709622915147864	0.818523457013772;0.706700888462158;0.900390438796966	-0.980357980679765;1.0746986805404293;-0.37236257416480784	miSeqRuns_UMCG-IBD-TIFN_Taxman_100Pc_GG13-PPI.txt;miSeqRuns_UMCG-IBD-TIFN_Taxman_100Pc_GG13-Reducing_stomach_acid2.txt;miSeqRuns_UMCG-IBD-TIFN_Taxman_100Pc_GG13-ZICPPI.txt	1828	1399	Increased	0.282265	0.777741	0.571021	0.00014971	0.000140586	0.000142044	0.000148362	0.000176312	0.000164239	0.00015604	9.76649e-05	0	0	1619	148	228	80	149	33	1242	35	8.0485	0.337048
PPI	Increased	k__Bacteria|p__Firmicutes|c__Erysipelotrichi|o__Erysipelotrichales|f__Erysipelotrichaceae|g__Clostridium	-9.2331162892109E-5;3.6243894419526E-4;4.60210967686688E-4	345;1174;309	234;788;230	0.959549194551491;0.771368177963843;0.893364524480223	0.994596915079819;0.990354369527115;0.957227530647886	-0.05071930340567823;0.29058572634000834;0.13404811877700348	miSeqRuns_UMCG-IBD-TIFN_Taxman_100Pc_GG13-PPI.txt;miSeqRuns_UMCG-IBD-TIFN_Taxman_100Pc_GG13-Reducing_stomach_acid2.txt;miSeqRuns_UMCG-IBD-TIFN_Taxman_100Pc_GG13-ZICPPI.txt	1828	1252	Increased	0.265952	0.790276	0.578759	0.00103955	0.0019653	0.000740676	0.0004782	0.00241207	0.00527973	0.00100674	0.000952689	0	0	1473	144	199	69	178	44	1096	31	0	0.98302
PPI	Decreased	k__Bacteria|p__Firmicutes|c__Clostridia|o__Clostridiales|f__Lachnospiraceae|g__Hespellia|s__porcina	-8.19734674804453E-5;1.4248635666262E-5;-8.63632384389661E-6	345;1174;309	6;19;8	0.320651080942376;0.79399251370232;0.922915710766214	0.815083230581663;0.990483578093088;0.966904425607754	-0.9931208158473089;0.26112966763125495;-0.09676161105923682	miSeqRuns_UMCG-IBD-TIFN_Taxman_100Pc_GG13-PPI.txt;miSeqRuns_UMCG-IBD-TIFN_Taxman_100Pc_GG13-Reducing_stomach_acid2.txt;miSeqRuns_UMCG-IBD-TIFN_Taxman_100Pc_GG13-ZICPPI.txt	1828	33	Decreased	-0.261958	0.793354	0.578885	2.72617e-07	2.79381e-07	2.46353e-07	3.91919e-07	3.31203e-07	3.31167e-07	3.21453e-07	0	0	0	40	3	6	1	5	2	29	0	0	0.607982
PPI	Increased	k__Bacteria|p__Bacteroidetes|c__Bacteroidia|o__Bacteroidales|f__Bacteroidaceae|g__Bacteroides|s__plebeius	-0.0101853891299078;0.00322662465572011;4.70853505821924E-4	345;1174;309	64;280;41	0.0934746344296719;0.237129656080782;0.923643481069942	0.540910403871239;0.663695848681309;0.966904425607754	-1.6773470636486332;1.182191672651773;0.09584524671246854	miSeqRuns_UMCG-IBD-TIFN_Taxman_100Pc_GG13-PPI.txt;miSeqRuns_UMCG-IBD-TIFN_Taxman_100Pc_GG13-Reducing_stomach_acid2.txt;miSeqRuns_UMCG-IBD-TIFN_Taxman_100Pc_GG13-ZICPPI.txt	1828	385	Increased	0.258114	0.796319	0.578885	0.000966675	0.000790219	0.000690643	0.00107233	0.00120356	0.000843264	0.0017959	0.000180183	0	0	425	45	57	27	29	11	339	7	51.8494	0.125329
PPI	Decreased	k__Bacteria|p__Firmicutes|c__Clostridia|o__Clostridiales|f__Tissierellaceae|g__ph2	4.08651542311263E-4;-2.5171983543325E-4;-2.97975734337245E-4	345;1174;309	18;144;20	0.113453953765937;0.411378182783795;0.485349996973852	0.588567305719953;0.826206010871917;0.831196271868959	1.5828574723237088;-0.8214707423082063;-0.6977237106662327	miSeqRuns_UMCG-IBD-TIFN_Taxman_100Pc_GG13-PPI.txt;miSeqRuns_UMCG-IBD-TIFN_Taxman_100Pc_GG13-Reducing_stomach_acid2.txt;miSeqRuns_UMCG-IBD-TIFN_Taxman_100Pc_GG13-ZICPPI.txt	1828	182	Decreased	-0.257541	0.796761	0.578885	7.99081e-06	4.42793e-06	9.15806e-06	4.58736e-06	1.02856e-05	8.1e-07	1.73534e-06	8.37484e-06	0	0	201	14	15	9	18	2	168	3	44.4559	0.165238
PPI	Increased	k__Bacteria|p__Fusobacteria|c__Fusobacteriia|o__Fusobacteriales|f__Fusobacteriaceae|g__Fusobacterium	-4.8816084425628E-4;1.60282980775906E-4;1.66135011518726E-4	345;1174;309	47;134;119	0.577890676467401;0.674655601877494;0.695851488505546	0.935968509893371;0.973855205903095;0.897199984639458	-0.5564684210876235;0.4197670993046658;0.39092660401035184	miSeqRuns_UMCG-IBD-TIFN_Taxman_100Pc_GG13-PPI.txt;miSeqRuns_UMCG-IBD-TIFN_Taxman_100Pc_GG13-Reducing_stomach_acid2.txt;miSeqRuns_UMCG-IBD-TIFN_Taxman_100Pc_GG13-ZICPPI.txt	1828	300	Increased	0.255377	0.798432	0.578885	0.000515163	0.00104225	1.37566e-05	9.96299e-06	0.00332655	0.0036238	3.58123e-05	8.97371e-06	0	0	386	46	41	18	94	23	251	5	0	0.750712
PPI	Increased	k__Bacteria|p__Proteobacteria|c__Epsilonproteobacteria|o__Campylobacterales|f__Campylobacteraceae|g__Campylobacter	1.40203810297371E-4;4.74537343204944E-5;-3.9052897312471E-4	345;1174;309	17;83;28	0.642371409947582;0.815722468003199;0.741109254151753	0.946840854127298;0.990483578093088;0.906076605742046	0.46438573292988217;0.2330501443727026;-0.3303847616591959	miSeqRuns_UMCG-IBD-TIFN_Taxman_100Pc_GG13-PPI.txt;miSeqRuns_UMCG-IBD-TIFN_Taxman_100Pc_GG13-Reducing_stomach_acid2.txt;miSeqRuns_UMCG-IBD-TIFN_Taxman_100Pc_GG13-ZICPPI.txt	1828	128	Increased	0.252674	0.80052	0.578952	1.45025e-05	9.76987e-06	3.61285e-06	5.87122e-06	7.67067e-05	1.916e-05	3.13644e-06	6.29061e-06	0	0	152	14	15	7	23	6	114	1	0	0.854159
PPI	Increased	k__Bacteria|p__Proteobacteria|c__Gammaproteobacteria|o__Enterobacteriales|f__Enterobacteriaceae|g__Buttiauxella|s__agrestis	1.63205732428002E-4;-1.28212411708267E-4;3.19703783608539E-4	345;1174;309	12;28;8	0.657249365938537;0.512082824909803;0.160688494151021	0.952437807781126;0.89690225003591;0.633571776938313	0.44371400878225375;-0.6555979810320737;1.4027597468557698	miSeqRuns_UMCG-IBD-TIFN_Taxman_100Pc_GG13-PPI.txt;miSeqRuns_UMCG-IBD-TIFN_Taxman_100Pc_GG13-Reducing_stomach_acid2.txt;miSeqRuns_UMCG-IBD-TIFN_Taxman_100Pc_GG13-ZICPPI.txt	1828	48	Increased	0.244104	0.80715	0.582295	3.56009e-06	3.71771e-06	3.5753e-06	9.48485e-07	1.35529e-06	6.39398e-06	5.34209e-06	5.94473e-06	0	0	50	11	9	4	4	4	37	3	21.0995	0.281557
PPI	Increased	k__Bacteria|p__Actinobacteria|c__Actinobacteria|o__Bifidobacteriales|f__Bifidobacteriaceae|g__Bifidobacterium|[s__thermacidophilum/s__animalis]	-3.21782910732868E-4;3.8046714564776E-4;-3.40557819805676E-4	345;1174;309	62;179;22	0.701950016607999;0.42979520328564;0.581410857866106	0.963065948632503;0.83570354987204;0.851498930510301	-0.382689478522301;0.7895421521504453;-0.5513250668593757	miSeqRuns_UMCG-IBD-TIFN_Taxman_100Pc_GG13-PPI.txt;miSeqRuns_UMCG-IBD-TIFN_Taxman_100Pc_GG13-Reducing_stomach_acid2.txt;miSeqRuns_UMCG-IBD-TIFN_Taxman_100Pc_GG13-ZICPPI.txt	1828	263	Increased	0.239809	0.810478	0.582885	2.23971e-05	2.65263e-05	2.04178e-05	3.91538e-05	1.84827e-05	1.34183e-05	3.3024e-05	1.74351e-05	9.21343e-05	1	306	26	52	13	18	4	236	9	0	0.601614
PPI	Decreased	k__Bacteria|p__Firmicutes|c__Clostridia|o__Clostridiales|f__Veillonellaceae|g__Acidaminococcus	-0.00181878277980937;1.81651405542887E-4;-0.00121824077294769	345;1174;309	50;146;70	0.532963838380384;0.889545693931326;0.854303966797741	0.922325394612758;0.990483578093088;0.947915408204298	-0.623488071764035;0.1388790908337417;-0.1836296939734348	miSeqRuns_UMCG-IBD-TIFN_Taxman_100Pc_GG13-PPI.txt;miSeqRuns_UMCG-IBD-TIFN_Taxman_100Pc_GG13-Reducing_stomach_acid2.txt;miSeqRuns_UMCG-IBD-TIFN_Taxman_100Pc_GG13-ZICPPI.txt	1828	266	Decreased	-0.235064	0.814159	0.582885	0.000506251	0.000661673	0.000154457	0.000192158	0.00222545	0.00191885	0.000381168	9.40524e-05	0	0	331	32	43	13	56	14	232	5	0	0.82428
PPI	Increased	k__Bacteria|p__Proteobacteria|c__Gammaproteobacteria|o__Enterobacteriales|f__Enterobacteriaceae|g__Enterobacter|s__hormaechei	-1.9505968332468E-4;-1.0881676344271E-4;0.00101885812053953	345;1174;309	27;38;20	0.671110549870893;0.72321884552189;0.0899330838922451	0.955415448483902;0.981222930219696;0.542154774116346	-0.4246243355513962;-0.3541601776776086;1.6957507981883937	miSeqRuns_UMCG-IBD-TIFN_Taxman_100Pc_GG13-PPI.txt;miSeqRuns_UMCG-IBD-TIFN_Taxman_100Pc_GG13-Reducing_stomach_acid2.txt;miSeqRuns_UMCG-IBD-TIFN_Taxman_100Pc_GG13-ZICPPI.txt	1828	85	Increased	0.228901	0.818946	0.582885	9.15937e-06	1.45973e-05	8.71501e-06	3.70405e-06	1.08586e-05	4.07196e-05	9.39525e-06	5.01086e-06	0	0	101	18	22	5	12	8	67	5	36.08	0.209202
PPI	Decreased	k__Bacteria|p__Firmicutes|c__Clostridia|o__Clostridiales|[f__Clostridiaceae/f__Veillonellaceae]	-5.07138604737325E-4;-3.65735161394727E-4;0.00392234933378475	345;1174;309	116;458;82	0.52745375520955;0.695662871428281;0.381884058730365	0.921846093914377;0.977122560270568;0.792529113982617	-0.6318976558795903;-0.3911817847201487;0.8744301230951534	miSeqRuns_UMCG-IBD-TIFN_Taxman_100Pc_GG13-PPI.txt;miSeqRuns_UMCG-IBD-TIFN_Taxman_100Pc_GG13-Reducing_stomach_acid2.txt;miSeqRuns_UMCG-IBD-TIFN_Taxman_100Pc_GG13-ZICPPI.txt	1828	656	Decreased	-0.228493	0.819263	0.582885	0.00123412	0.000699998	0.00142309	0.000748405	0.00100016	0.000951065	0.000726288	0.00031066	0	0	735	75	99	37	58	24	578	14	0	0.531332
PPI	Decreased	k__Bacteria|p__Proteobacteria|c__Gammaproteobacteria|o__Enterobacteriales|f__Enterobacteriaceae|g__Citrobacter|s__freundii	-2.9149543639109E-4;2.10256756140041E-5;-4.55981435721207E-5	345;1174;309	23;66;17	0.613069146552295;0.970339187286257;0.927844852511699	0.938249608898661;0.994555003200321;0.969007071960287	-0.505697324847536;0.03718288209105129;-0.09055668287054895	miSeqRuns_UMCG-IBD-TIFN_Taxman_100Pc_GG13-PPI.txt;miSeqRuns_UMCG-IBD-TIFN_Taxman_100Pc_GG13-Reducing_stomach_acid2.txt;miSeqRuns_UMCG-IBD-TIFN_Taxman_100Pc_GG13-ZICPPI.txt	1828	106	Decreased	-0.227124	0.820327	0.582885	2.53437e-05	8.44019e-06	2.97185e-05	1.00713e-05	1.74596e-05	1.0477e-05	1.56452e-05	2.87765e-06	0	0	122	18	20	10	13	5	89	3	0	0.898648
PPI	Increased	k__Bacteria|p__Proteobacteria|c__Epsilonproteobacteria|o__Campylobacterales|f__Campylobacteraceae	1.40203810297371E-4;4.04455176226134E-5;-3.9052897312471E-4	345;1174;309	17;85;28	0.642371409947582;0.843714086300109;0.741109254151753	0.946840854127298;0.990483578093088;0.906076605742046	0.46438573292988217;0.19714497849377044;-0.3303847616591959	miSeqRuns_UMCG-IBD-TIFN_Taxman_100Pc_GG13-PPI.txt;miSeqRuns_UMCG-IBD-TIFN_Taxman_100Pc_GG13-Reducing_stomach_acid2.txt;miSeqRuns_UMCG-IBD-TIFN_Taxman_100Pc_GG13-ZICPPI.txt	1828	130	Increased	0.2239	0.822835	0.582885	1.45507e-05	9.76987e-06	3.68475e-06	5.87122e-06	7.67067e-05	1.916e-05	3.13644e-06	6.29061e-06	0	0	154	14	15	7	23	6	116	1	0	0.854899
PPI	Increased	k__Bacteria|p__Firmicutes|c__Bacilli|o__Bacillales|f__Planococcaceae|g__Bacillus	-6.97926195370632E-5;1.04311880798986E-4;-4.42643800201805E-5	345;1174;309	3;23;1	0.450746871460383;0.273929288628943;0.426701961508178	0.889138518670965;0.69956936278688;0.806298730751268	-0.7541704623940612;1.0940585761098676;-0.7948479382618835	miSeqRuns_UMCG-IBD-TIFN_Taxman_100Pc_GG13-PPI.txt;miSeqRuns_UMCG-IBD-TIFN_Taxman_100Pc_GG13-Reducing_stomach_acid2.txt;miSeqRuns_UMCG-IBD-TIFN_Taxman_100Pc_GG13-ZICPPI.txt	1828	27	Increased	0.222341	0.824048	0.582885	5.81475e-07	7.25714e-07	7.22296e-07	1.53939e-06	1.72614e-07	0	3.98616e-07	0	0	0	28	3	3	3	1	0	24	0	14.8242	0.309115
PPI	Increased	k__Bacteria|p__Firmicutes|c__Bacilli|o__Bacillales|f__Planococcaceae|g__Bacillus|s__massiliensis	-6.97926195370632E-5;1.04311880798986E-4;-4.42643800201805E-5	345;1174;309	3;23;1	0.450746871460383;0.273929288628943;0.426701961508178	0.889138518670965;0.69956936278688;0.806298730751268	-0.7541704623940612;1.0940585761098676;-0.7948479382618835	miSeqRuns_UMCG-IBD-TIFN_Taxman_100Pc_GG13-PPI.txt;miSeqRuns_UMCG-IBD-TIFN_Taxman_100Pc_GG13-Reducing_stomach_acid2.txt;miSeqRuns_UMCG-IBD-TIFN_Taxman_100Pc_GG13-ZICPPI.txt	1828	27	Increased	0.222341	0.824048	0.582885	5.81475e-07	7.25714e-07	7.22296e-07	1.53939e-06	1.72614e-07	0	3.98616e-07	0	0	0	28	3	3	3	1	0	24	0	14.8242	0.309115
PPI	Increased	k__Bacteria|p__Proteobacteria|c__Gammaproteobacteria|o__Enterobacteriales|f__Enterobacteriaceae|g__Enterobacter|s__ludwigii	-3.63522683714956E-5;-2.26889761499536E-4;0.00157395566727493	345;1174;309	17;34;19	0.941075238930772;0.443166225206461;0.0359346461050081	0.991539144897722;0.846137512231245;0.406244219526108	-0.0739184953708965;-0.766857532899458;2.097666161191134	miSeqRuns_UMCG-IBD-TIFN_Taxman_100Pc_GG13-PPI.txt;miSeqRuns_UMCG-IBD-TIFN_Taxman_100Pc_GG13-Reducing_stomach_acid2.txt;miSeqRuns_UMCG-IBD-TIFN_Taxman_100Pc_GG13-ZICPPI.txt	1828	70	Increased	0.21577	0.829167	0.585079	8.89339e-06	2.86371e-05	8.1334e-06	2.61843e-06	1.0513e-05	8.93405e-05	1.03697e-05	7.72824e-06	0	0	78	14	12	2	11	7	55	5	59.5729	0.0842817
PPI	Decreased	k__Bacteria|p__Firmicutes|c__Clostridia|o__Clostridiales|f__Lachnospiraceae|g__Robinsoniella|s__peoriensis	8.33043817193266E-5;-2.69480256729361E-5;-8.48378151487614E-5	345;1174;309	9;7;3	0.622424403793447;0.660201462170003;0.865911106857208	0.939749539503404;0.969500838367632;0.9502998918379	0.4924172548205903;-0.4396350342891706;-0.16885447721665603	miSeqRuns_UMCG-IBD-TIFN_Taxman_100Pc_GG13-PPI.txt;miSeqRuns_UMCG-IBD-TIFN_Taxman_100Pc_GG13-Reducing_stomach_acid2.txt;miSeqRuns_UMCG-IBD-TIFN_Taxman_100Pc_GG13-ZICPPI.txt	1828	19	Decreased	-0.207822	0.835368	0.588024	2.50808e-06	1.11697e-06	3.52498e-07	0	1.40806e-05	1.585e-06	8.75779e-07	2.73459e-06	0	0	27	2	8	0	2	1	17	1	0	0.810148
PPI	Decreased	k__Bacteria|p__Proteobacteria|c__Alphaproteobacteria|o__Rickettsiales|f__mitochondria|g__Lupinus|s__luteus	2.81162617356555E-4;-1.63439114834513E-4;-3.95273006216389E-4	345;1174;309	3;67;18	0.0500739189723458;0.43053514177717;0.309528789832854	0.410233594381757;0.836286453055066;0.765646554522569	1.9593319961944726;-0.788276241148859;-1.0162112719787262	miSeqRuns_UMCG-IBD-TIFN_Taxman_100Pc_GG13-PPI.txt;miSeqRuns_UMCG-IBD-TIFN_Taxman_100Pc_GG13-Reducing_stomach_acid2.txt;miSeqRuns_UMCG-IBD-TIFN_Taxman_100Pc_GG13-ZICPPI.txt	1828	88	Decreased	-0.19833	0.842787	0.591133	3.80476e-06	4.1793e-06	3.91139e-06	3.84519e-06	7.83931e-06	3.85615e-06	4.36678e-08	5.20806e-06	0	0	99	7	2	4	16	2	81	1	63.3277	0.0654247
PPI	Decreased	k__Bacteria|p__Bacteroidetes|c__Bacteroidia|o__Bacteroidales|f__Rikenellaceae|g__Alistipes|s__putredinis	-0.00972469805826291;0.00450558153833599;-0.00773490819717819	345;1174;309	258;969;175	0.0223110564246592;0.0971574799949651;0.195532915834755	0.284301695729656;0.432477006162058;0.660698211435375	-2.285030209974053;1.658793155724623;-1.2943837064483124	miSeqRuns_UMCG-IBD-TIFN_Taxman_100Pc_GG13-PPI.txt;miSeqRuns_UMCG-IBD-TIFN_Taxman_100Pc_GG13-Reducing_stomach_acid2.txt;miSeqRuns_UMCG-IBD-TIFN_Taxman_100Pc_GG13-ZICPPI.txt	1828	1402	Decreased	-0.195518	0.844988	0.591133	0.00172843	0.00142767	0.00153977	0.00172264	0.00264437	0.001485	0.00166642	0.000787625	0.00012899	0	1606	148	218	81	141	31	1247	36	79.1887	0.00818805
PPI	Increased	k__Bacteria|p__Proteobacteria|c__Gammaproteobacteria|o__Enterobacteriales|f__Enterobacteriaceae|[g__Klebsiella/g__Enterobacter/g__Pantoea]	-1.86934678554964E-4;3.46435084083804E-5;2.27091868041225E-4	345;1174;309	4;11;9	0.184354858574303;0.653231217860388;0.317905665756559	0.695703418626978;0.967871433413119;0.766455146629365	-1.3274651566302311;0.4492778727065963;0.9987709414484113	miSeqRuns_UMCG-IBD-TIFN_Taxman_100Pc_GG13-PPI.txt;miSeqRuns_UMCG-IBD-TIFN_Taxman_100Pc_GG13-Reducing_stomach_acid2.txt;miSeqRuns_UMCG-IBD-TIFN_Taxman_100Pc_GG13-ZICPPI.txt	1828	24	Increased	0.193992	0.846182	0.591133	6.90944e-07	2.21352e-06	5.1702e-07	5.05051e-07	1.16382e-06	6.91398e-06	9.43557e-07	0	0	0	27	5	4	2	5	3	18	0	31.5988	0.231781
PPI	Decreased	k__Bacteria|p__Proteobacteria|c__Gammaproteobacteria|o__Enterobacteriales|f__Enterobacteriaceae|g__Enterobacter|s__asburiae	-4.74969062337459E-4;-4.69986221761256E-5;5.45915993649967E-4	345;1174;309	7;24;14	0.154788525780713;0.792299427308415;0.121067605627174	0.661489904974496;0.990483578093088;0.584969999404978	-1.422819366270742;-0.2633258627511923;1.5503080103245823	miSeqRuns_UMCG-IBD-TIFN_Taxman_100Pc_GG13-PPI.txt;miSeqRuns_UMCG-IBD-TIFN_Taxman_100Pc_GG13-Reducing_stomach_acid2.txt;miSeqRuns_UMCG-IBD-TIFN_Taxman_100Pc_GG13-ZICPPI.txt	1828	45	Decreased	-0.19175	0.847938	0.591133	3.46486e-06	4.26734e-06	2.95648e-06	8.35152e-07	3.57854e-06	1.35577e-05	5.2611e-06	0	0	0	47	9	7	3	6	6	34	0	55.1614	0.107505
PPI	Decreased	k__Bacteria|p__Proteobacteria|c__Gammaproteobacteria|o__Pasteurellales|f__Pasteurellaceae|g__Aggregatibacter	-2.73678664861829E-4;2.57853537002567E-5;1.8304156982548E-4	345;1174;309	9;32;12	0.212005846209887;0.833634555803763;0.643591585776774	0.715734795500286;0.990483578093088;0.88099983320435	-1.2480688455850486;0.21004243186189733;0.46268302739185924	miSeqRuns_UMCG-IBD-TIFN_Taxman_100Pc_GG13-PPI.txt;miSeqRuns_UMCG-IBD-TIFN_Taxman_100Pc_GG13-Reducing_stomach_acid2.txt;miSeqRuns_UMCG-IBD-TIFN_Taxman_100Pc_GG13-ZICPPI.txt	1828	53	Decreased	-0.183646	0.854291	0.594134	2.48186e-06	1.51931e-06	1.33003e-06	1.23485e-06	7.96237e-06	3.28008e-06	2.19608e-06	0	0	0	62	7	8	4	9	3	45	0	0	0.410216
PPI	Increased	k__Bacteria|p__Proteobacteria|c__Gammaproteobacteria|o__Aeromonadales|f__Succinivibrionaceae	-8.62963660830722E-6;-4.86025810686626E-4;0.00544883690794775	345;1174;309	5;58;17	0.99387098844735;0.763448580936528;0.305904004041048	0.999808023053732;0.988475071991572;0.763523709859157	-0.007681652372250525;-0.30095529953094546;1.0238544997178158	miSeqRuns_UMCG-IBD-TIFN_Taxman_100Pc_GG13-PPI.txt;miSeqRuns_UMCG-IBD-TIFN_Taxman_100Pc_GG13-Reducing_stomach_acid2.txt;miSeqRuns_UMCG-IBD-TIFN_Taxman_100Pc_GG13-ZICPPI.txt	1828	80	Increased	0.176428	0.859958	0.596644	0.000306855	0.000668676	0.000229046	0.000161356	0.000958864	0.00207413	5.25678e-05	0	0	0	91	6	4	3	14	3	73	0	0	0.574709
PPI	Decreased	k__Bacteria|p__Actinobacteria|c__Coriobacteriia|o__Coriobacteriales|f__Coriobacteriaceae	0.0171895465826494;-0.0059470902323731;-0.00852672727795542	345;1174;309	345;1173;304	0.134573749745731;0.526292395280629;0.448748799216281	0.634564381672564;0.901757194104931;0.816483640510386	1.4963067007712447;-0.6336758399115273;-0.7575026160076485	miSeqRuns_UMCG-IBD-TIFN_Taxman_100Pc_GG13-PPI.txt;miSeqRuns_UMCG-IBD-TIFN_Taxman_100Pc_GG13-Reducing_stomach_acid2.txt;miSeqRuns_UMCG-IBD-TIFN_Taxman_100Pc_GG13-ZICPPI.txt	1828	1822	Decreased	-0.169222	0.865622	0.598073	0.0344194	0.0319118	0.0390001	0.038292	0.0217109	0.0214553	0.0279782	0.0318284	0.00305167	0	2126	209	289	99	237	59	1600	51	37.2185	0.20335
PPI	Decreased	k__Bacteria|p__Firmicutes|c__Bacilli|o__Lactobacillales|f__Streptococcaceae|g__Lactococcus	-9.61942020425481E-4;0.00102690625806466;-0.0018315811035932	345;1174;309	202;764;178	0.53951344535871;0.371561461068373;0.132740484248492	0.924456905914422;0.807373721291159;0.593550187667558	-0.6135489217630536;0.8935523308083226;-1.5033823154613897	miSeqRuns_UMCG-IBD-TIFN_Taxman_100Pc_GG13-PPI.txt;miSeqRuns_UMCG-IBD-TIFN_Taxman_100Pc_GG13-Reducing_stomach_acid2.txt;miSeqRuns_UMCG-IBD-TIFN_Taxman_100Pc_GG13-ZICPPI.txt	1828	1144	Decreased	-0.16856	0.866142	0.598073	0.00070079	0.000335356	0.000580622	0.000410093	0.00155442	0.000159539	0.000435927	0.000397121	0.00616398	1	1319	129	171	69	141	32	1007	28	41.2908	0.182079
PPI	Increased	k__Bacteria|p__Proteobacteria|c__Betaproteobacteria|o__Burkholderiales|f__Comamonadaceae|g__Diaphorobacter|s__nitroreducens	7.49521040456574E-7;-5.30879657146393E-5;1.09977263786404E-4	345;1174;309	1;17;1	0.981673518738512;0.401419964951837;0.0453424029824649	0.997932569686937;0.82199437451914;0.444157936450849	0.022970858027432615;-0.8390879367788494;2.0014640615961494	miSeqRuns_UMCG-IBD-TIFN_Taxman_100Pc_GG13-PPI.txt;miSeqRuns_UMCG-IBD-TIFN_Taxman_100Pc_GG13-Reducing_stomach_acid2.txt;miSeqRuns_UMCG-IBD-TIFN_Taxman_100Pc_GG13-ZICPPI.txt	1828	19	Increased	0.160424	0.872547	0.601065	2.65103e-07	1.92857e-07	3.82502e-07	0	0	6.75e-07	4.9481e-08	0	0	0	19	1	1	0	0	1	18	0	57.308	0.0961006
PPI	Decreased	k__Bacteria|p__Firmicutes|c__Bacilli|o__Lactobacillales|f__Carnobacteriaceae|g__Carnobacterium|s__viridans	-1.05437645628594E-4;-8.24136616870388E-6;9.3794523576094E-5	345;1174;309	5;17;2	0.248163520070835;0.935411263948451;0.312348011050739	0.754835259553063;0.992019771063516;0.766455146629365	-1.1548215262283248;-0.08103858884659615;1.0103074539499766	miSeqRuns_UMCG-IBD-TIFN_Taxman_100Pc_GG13-PPI.txt;miSeqRuns_UMCG-IBD-TIFN_Taxman_100Pc_GG13-Reducing_stomach_acid2.txt;miSeqRuns_UMCG-IBD-TIFN_Taxman_100Pc_GG13-ZICPPI.txt	1828	24	Decreased	-0.151256	0.879774	0.60187	7.40427e-07	4.49048e-07	9.22778e-07	6.21212e-07	3.45228e-07	5.46667e-07	3.91696e-07	0	3.10277e-06	1	27	3	5	2	1	1	21	0	14.4576	0.310674
PPI	Increased	k__Bacteria|p__Proteobacteria|c__Gammaproteobacteria|o__Aeromonadales	-8.62963660830722E-6;-4.86025810686626E-4;0.00504206275000535	345;1174;309	5;58;19	0.99387098844735;0.763448580936528;0.345741038601694	0.999808023053732;0.988475071991572;0.778841399660491	-0.007681652372250525;-0.30095529953094546;0.9428824382481069	miSeqRuns_UMCG-IBD-TIFN_Taxman_100Pc_GG13-PPI.txt;miSeqRuns_UMCG-IBD-TIFN_Taxman_100Pc_GG13-Reducing_stomach_acid2.txt;miSeqRuns_UMCG-IBD-TIFN_Taxman_100Pc_GG13-ZICPPI.txt	1828	82	Increased	0.143137	0.886182	0.60187	0.000381356	0.000668676	0.000229046	0.000161356	0.00145502	0.00207413	5.25678e-05	0	0	0	97	6	4	3	17	3	76	0	0	0.61904
PPI	Decreased	k__Bacteria|p__Firmicutes|c__Erysipelotrichi|o__Erysipelotrichales|f__Erysipelotrichaceae|g__Catenibacterium	3.6801935194705E-4;-1.44509703566424E-4;-0.00384194120385393	345;1174;309	122;425;57	0.263372465708378;0.582534414794833;0.648626994454877	0.768240886565896;0.937709638047118;0.88296123445052	1.1184555850429507;-0.5496865045399186;-0.45567042205359454	miSeqRuns_UMCG-IBD-TIFN_Taxman_100Pc_GG13-PPI.txt;miSeqRuns_UMCG-IBD-TIFN_Taxman_100Pc_GG13-Reducing_stomach_acid2.txt;miSeqRuns_UMCG-IBD-TIFN_Taxman_100Pc_GG13-ZICPPI.txt	1828	604	Decreased	-0.141968	0.887105	0.60187	0.00568651	0.00435716	0.00629494	0.00530115	0.00346034	0.00265751	0.00527976	0.00452429	0	0	682	65	104	35	42	13	536	17	0	0.41883
PPI	Increased	k__Bacteria|p__Firmicutes|c__Clostridia|o__Clostridiales|f__Peptococcaceae|g__Peptococcus	0.00538783936815987;-0.00185050190060978;0.00110646292477397	345;1174;309	63;332;44	0.230123114019575;0.518608536092894;0.741654959003358	0.730401988461482;0.901274647957303;0.90610513264823	1.2000417816578826;-0.6454917913839665;0.3296625433630837	miSeqRuns_UMCG-IBD-TIFN_Taxman_100Pc_GG13-PPI.txt;miSeqRuns_UMCG-IBD-TIFN_Taxman_100Pc_GG13-Reducing_stomach_acid2.txt;miSeqRuns_UMCG-IBD-TIFN_Taxman_100Pc_GG13-ZICPPI.txt	1828	439	Increased	0.139581	0.888991	0.60187	0.00107343	0.00108498	0.00128817	0.00102466	0.000505127	0.000674899	0.000748585	0.00168454	0.000132533	0	482	42	53	22	33	11	396	9	0	0.377956
PPI	Increased	k__Bacteria|p__Firmicutes|c__Clostridia|o__Clostridiales|f__Lachnospiraceae|g__Blautia	-0.00699320410413495;0.00459967968015058;-0.00245599580056674	345;1174;309	345;1174;309	0.663494151896443;0.624430632640249;0.870662439185138	0.953832450945792;0.958196606344893;0.950521572919214	-0.4350940640480857;0.48958070525890296;-0.16281710621036075	miSeqRuns_UMCG-IBD-TIFN_Taxman_100Pc_GG13-PPI.txt;miSeqRuns_UMCG-IBD-TIFN_Taxman_100Pc_GG13-Reducing_stomach_acid2.txt;miSeqRuns_UMCG-IBD-TIFN_Taxman_100Pc_GG13-ZICPPI.txt	1828	1828	Increased	0.136387	0.891515	0.60187	0.0822245	0.0906999	0.0763136	0.0857796	0.0851898	0.0835292	0.101738	0.108687	0.000534875	0	2135	210	289	99	241	60	1605	51	0	0.803762
PPI	Increased	k__Bacteria|p__Proteobacteria|c__Gammaproteobacteria|o__Enterobacteriales|f__Enterobacteriaceae|g__Erwinia	-3.1888480854105E-4;2.35099265301389E-4;-9.05397906092733E-5	345;1174;309	11;34;21	0.197127614338165;0.351230378824546;0.899870330505717	0.70273878801426;0.79615145880194;0.95929696237718	-1.2897783863948715;0.9322054125315856;-0.12582515336237493	miSeqRuns_UMCG-IBD-TIFN_Taxman_100Pc_GG13-PPI.txt;miSeqRuns_UMCG-IBD-TIFN_Taxman_100Pc_GG13-Reducing_stomach_acid2.txt;miSeqRuns_UMCG-IBD-TIFN_Taxman_100Pc_GG13-ZICPPI.txt	1828	66	Increased	0.135011	0.892603	0.60187	8.34505e-06	5.54055e-06	5.62706e-06	4.39307e-06	2.71667e-05	1.126e-05	2.75971e-06	1.03922e-06	0	0	77	15	10	7	15	7	52	1	20.953	0.28222
PPI	Increased	k__Bacteria|p__Proteobacteria|c__Gammaproteobacteria|[o__Aeromonadales/o__Enterobacteriales]	7.17545781939599E-7;-4.62834137234102E-5;3.37641945958196E-4	345;1174;309	4;13;6	0.996454338959113;0.554060868923418;0.139971453782139	0.999808023053732;0.922444502952929;0.598467690209532	0.00444384173459319;-0.5916860063011542;1.4758973397183959	miSeqRuns_UMCG-IBD-TIFN_Taxman_100Pc_GG13-PPI.txt;miSeqRuns_UMCG-IBD-TIFN_Taxman_100Pc_GG13-Reducing_stomach_acid2.txt;miSeqRuns_UMCG-IBD-TIFN_Taxman_100Pc_GG13-ZICPPI.txt	1828	23	Increased	0.134559	0.89296	0.60187	7.33259e-07	3.17942e-06	5.75183e-07	5.0303e-08	1.16584e-06	9.71997e-06	9.60519e-07	1.55882e-06	0	0	26	5	3	1	4	3	19	1	20.3276	0.285036
PPI	Increased	k__Bacteria|p__Bacteroidetes|c__Bacteroidia|o__Bacteroidales|f__Bacteroidaceae|g__Bacteroides|s__caccae	-0.00592455822409137;0.00488531050067316;-0.00948519413621569	345;1174;309	264;926;215	0.18513584616801;0.0700001798570922;0.0706231342104305	0.695703418626978;0.35725965606409;0.509250059657915	-1.3251064529495462;1.8119095091325186;-1.8078931363993949	miSeqRuns_UMCG-IBD-TIFN_Taxman_100Pc_GG13-PPI.txt;miSeqRuns_UMCG-IBD-TIFN_Taxman_100Pc_GG13-Reducing_stomach_acid2.txt;miSeqRuns_UMCG-IBD-TIFN_Taxman_100Pc_GG13-ZICPPI.txt	1828	1405	Increased	0.133085	0.894126	0.60187	0.00207537	0.00198212	0.00181323	0.00166669	0.00302857	0.00239613	0.00225555	0.00210737	3.00737e-05	0	1644	147	229	74	167	41	1248	32	75.8736	0.0158459
PPI	Increased	k__Bacteria|p__Proteobacteria|c__Betaproteobacteria|o__Burkholderiales|f__Comamonadaceae	7.90380717670911E-4;-2.61480595788751E-4;2.97684724370359E-4	345;1174;309	7;54;10	0.29129945699613;0.18577279268176;0.0744990066224083	0.797062305050999;0.595480875226951;0.516732859404705	1.0552752502830824;-1.323188219415285;1.783536532359219	miSeqRuns_UMCG-IBD-TIFN_Taxman_100Pc_GG13-PPI.txt;miSeqRuns_UMCG-IBD-TIFN_Taxman_100Pc_GG13-Reducing_stomach_acid2.txt;miSeqRuns_UMCG-IBD-TIFN_Taxman_100Pc_GG13-ZICPPI.txt	1828	71	Increased	0.131336	0.89551	0.60187	6.92338e-06	4.97963e-06	3.73226e-06	8.75758e-07	6.57303e-07	3.89115e-06	2.40188e-05	1.42265e-05	0	0	76	7	5	2	7	3	64	2	66.8225	0.0490903
PPI	Decreased	k__Bacteria|p__Actinobacteria|c__Coriobacteriia|o__Coriobacteriales|f__Coriobacteriaceae|g__Collinsella	0.0168678636552265;-0.00841944906952603;-0.00249552817961614	345;1174;309	328;1067;247	0.148903192704875;0.40194188584292;0.834072695345297	0.658197819937489;0.82199437451914;0.940914212288451	1.4434164506640563;-0.8381581533415293;-0.20948109072321025	miSeqRuns_UMCG-IBD-TIFN_Taxman_100Pc_GG13-PPI.txt;miSeqRuns_UMCG-IBD-TIFN_Taxman_100Pc_GG13-Reducing_stomach_acid2.txt;miSeqRuns_UMCG-IBD-TIFN_Taxman_100Pc_GG13-ZICPPI.txt	1828	1642	Decreased	-0.130755	0.895969	0.60187	0.0194279	0.0177903	0.0215452	0.0196536	0.0126784	0.0126435	0.0171804	0.0202283	0.000349137	0	1907	189	276	92	190	50	1441	47	28.8951	0.24503
PPI	Decreased	k__Bacteria|p__Tenericutes|c__Mollicutes|o__Anaeroplasmatales|f__Anaeroplasmataceae|g__Anaeroplasma	1.56721291517005E-5;-6.13174333425096E-5	1174;309	39;2	0.850322852231419;0.516334977488929	0.990483578093088;0.838285022276143	0.18870650590440294;-0.6490052582069329	miSeqRuns_UMCG-IBD-TIFN_Taxman_100Pc_GG13-Reducing_stomach_acid2.txt;miSeqRuns_UMCG-IBD-TIFN_Taxman_100Pc_GG13-ZICPPI.txt	1483	41	Decreased	-0.128349	0.897873	0.60187	5.01297e-07	2.3281e-07	6.37302e-07	4.93838e-07	4.95776e-07	0	0	0	0	0	40	3	0	3	2	0	38	0	0	0.506956
PPI	Decreased	k__Bacteria|p__Firmicutes|c__Erysipelotrichi|o__Erysipelotrichales|f__Erysipelotrichaceae|g__RFN20	-1.50614816866148E-4;4.80761311033468E-5;-2.66557504494811E-4	345;1174;309	10;17;3	0.696352560214488;0.715354937007898;0.545564515774518	0.960349598409694;0.980533652313046;0.843389593796883	-0.39024882589365845;0.3646737749109739;-0.6044198892143472	miSeqRuns_UMCG-IBD-TIFN_Taxman_100Pc_GG13-PPI.txt;miSeqRuns_UMCG-IBD-TIFN_Taxman_100Pc_GG13-Reducing_stomach_acid2.txt;miSeqRuns_UMCG-IBD-TIFN_Taxman_100Pc_GG13-ZICPPI.txt	1828	30	Decreased	-0.125791	0.899897	0.60187	3.12522e-06	7.45552e-07	1.49607e-06	1.58147e-06	1.08253e-05	0	2.76408e-06	0	0	0	39	2	9	2	3	0	27	0	0	0.728046
PPI	Decreased	k__Bacteria|p__Proteobacteria|c__Gammaproteobacteria|o__Enterobacteriales|f__Enterobacteriaceae|g__Kluyvera|s__intermedia	-2.54613106512899E-4;-5.69112178387922E-5;4.28678255914367E-4	345;1174;309	9;13;5	0.273552574183945;0.668350529762394;0.0913158726003369	0.77530722009439;0.972003932043201;0.542154774116346	-1.094917973211133;-0.42841290644220886;1.6884969570611228	miSeqRuns_UMCG-IBD-TIFN_Taxman_100Pc_GG13-PPI.txt;miSeqRuns_UMCG-IBD-TIFN_Taxman_100Pc_GG13-Reducing_stomach_acid2.txt;miSeqRuns_UMCG-IBD-TIFN_Taxman_100Pc_GG13-ZICPPI.txt	1828	27	Decreased	-0.124784	0.900695	0.60187	1.68021e-06	3.57193e-06	1.62826e-06	5.55556e-07	8.76033e-07	1.15851e-05	2.54403e-06	0	0	0	33	5	9	2	2	3	22	0	52.5823	0.121369
PPI	Increased	k__Bacteria|p__Proteobacteria|c__Gammaproteobacteria|o__Enterobacteriales|f__Enterobacteriaceae|g__Kluyvera	-2.2536190382983E-4;-7.94507761810332E-5;6.47211908106322E-4	345;1174;309	13;17;8	0.383947616591507;0.586229423989644;0.0239120882674082	0.85246888535102;0.939479928509855;0.374178467064881	-0.8706457345620388;-0.5443081725646716;2.2585388025787387	miSeqRuns_UMCG-IBD-TIFN_Taxman_100Pc_GG13-PPI.txt;miSeqRuns_UMCG-IBD-TIFN_Taxman_100Pc_GG13-Reducing_stomach_acid2.txt;miSeqRuns_UMCG-IBD-TIFN_Taxman_100Pc_GG13-ZICPPI.txt	1828	38	Increased	0.114137	0.909129	0.605017	2.07e-06	4.49765e-06	1.97386e-06	6.06061e-07	1.28877e-06	1.43001e-05	3.0791e-06	5.19608e-07	0	0	45	8	12	2	3	5	30	1	67.4387	0.0463686
PPI	Decreased	k__Bacteria|p__Firmicutes|c__Clostridia|o__Clostridiales|f__EtOH8	-3.33177872114873E-5;-1.84339512825308E-4;1.92870173092355E-4	345;1174;309	25;88;8	0.920131656071751;0.467889786209869;0.213255888299847	0.991109715557945;0.861671379969835;0.688145216062231	-0.10026788116943082;-0.7259167846579108;1.2446623573619422	miSeqRuns_UMCG-IBD-TIFN_Taxman_100Pc_GG13-PPI.txt;miSeqRuns_UMCG-IBD-TIFN_Taxman_100Pc_GG13-Reducing_stomach_acid2.txt;miSeqRuns_UMCG-IBD-TIFN_Taxman_100Pc_GG13-ZICPPI.txt	1828	121	Decreased	-0.113573	0.909577	0.605017	5.02361e-06	3.67298e-06	6.12562e-06	3.54502e-06	6.24896e-07	3.07175e-06	4.5926e-06	4.62871e-06	0	0	136	12	21	6	6	2	109	4	3.53517	0.354642
PPI	Decreased	k__Bacteria|p__Actinobacteria|c__Actinobacteria|o__Actinomycetales|f__Actinomycetaceae|g__Actinobaculum	-6.02066731199372E-5;1.01406157331347E-4;-3.18588286448744E-4	345;1174;309	3;11;9	0.538173641487799;0.627055464311576;0.582647870917141	0.924276198958863;0.958821651800527;0.851498930510301	-0.6155771417558834;0.4858754657550335;-0.5495211255572529	miSeqRuns_UMCG-IBD-TIFN_Taxman_100Pc_GG13-PPI.txt;miSeqRuns_UMCG-IBD-TIFN_Taxman_100Pc_GG13-Reducing_stomach_acid2.txt;miSeqRuns_UMCG-IBD-TIFN_Taxman_100Pc_GG13-ZICPPI.txt	1828	23	Decreased	-0.103979	0.917186	0.607159	5.469e-06	1.22002e-06	3.86726e-06	2.23842e-06	1.86342e-05	5.76667e-07	4.48443e-07	0	3.12842e-07	0	31	3	3	2	8	1	20	0	0	0.635663
PPI	Increased	k__Bacteria|p__Firmicutes|c__Clostridia|o__Clostridiales|f__Lachnospiraceae|g__Clostridium|s__citroniae	-2.01779850481433E-5;1.58884917175789E-5;8.94663975241885E-6	345;1174;309	17;30;48	0.91784801001673;0.864045256624154;0.983663187131162	0.991109715557945;0.990483578093088;0.992341838895616	-0.10314484956400478;0.1712270272671144;0.020476589377825108	miSeqRuns_UMCG-IBD-TIFN_Taxman_100Pc_GG13-PPI.txt;miSeqRuns_UMCG-IBD-TIFN_Taxman_100Pc_GG13-Reducing_stomach_acid2.txt;miSeqRuns_UMCG-IBD-TIFN_Taxman_100Pc_GG13-ZICPPI.txt	1828	95	Increased	0.10083	0.919686	0.607159	2.26133e-06	2.46686e-06	7.71865e-07	5.83838e-07	9.73717e-06	6.27733e-06	1.56755e-06	1.63922e-06	0	0	128	14	15	2	35	10	78	2	0	0.985008
PPI	Increased	k__Bacteria|p__Proteobacteria|c__Epsilonproteobacteria|o__Campylobacterales	8.74661021299296E-5;2.86667297274728E-5;-3.9052897312471E-4	345;1174;309	18;87;28	0.784479789011551;0.889138575255369;0.741109254151753	0.984610234682952;0.990483578093088;0.906076605742046	0.273485822616732;0.13939430135879688;-0.3303847616591959	miSeqRuns_UMCG-IBD-TIFN_Taxman_100Pc_GG13-PPI.txt;miSeqRuns_UMCG-IBD-TIFN_Taxman_100Pc_GG13-Reducing_stomach_acid2.txt;miSeqRuns_UMCG-IBD-TIFN_Taxman_100Pc_GG13-ZICPPI.txt	1828	133	Increased	0.0946858	0.924564	0.607159	1.46609e-05	9.76987e-06	3.70865e-06	5.87122e-06	7.67067e-05	1.916e-05	3.65987e-06	6.29061e-06	0	0	158	14	16	7	23	6	119	1	0	0.907368
PPI	Increased	k__Bacteria|p__Proteobacteria|c__Gammaproteobacteria|o__Pasteurellales|f__Pasteurellaceae|[g__Haemophilus/g__Aggregatibacter]	-1.69530286450036E-4;-1.72372708512717E-5;3.24091557653774E-4	345;1174;309	13;41;14	0.353667397806622;0.902774046300648;0.151042552047365	0.840717928500312;0.990483578093088;0.617632434377664	-0.9274992176288954;-0.12215780063892905;1.4358587017215132	miSeqRuns_UMCG-IBD-TIFN_Taxman_100Pc_GG13-PPI.txt;miSeqRuns_UMCG-IBD-TIFN_Taxman_100Pc_GG13-Reducing_stomach_acid2.txt;miSeqRuns_UMCG-IBD-TIFN_Taxman_100Pc_GG13-ZICPPI.txt	1828	68	Increased	0.0895094	0.928677	0.607159	1.71701e-06	1.90255e-06	1.85249e-06	8.43939e-07	1.48714e-06	5.26643e-06	1.40477e-06	0	0	0	79	8	12	4	9	4	58	0	31.7139	0.23121
PPI	Decreased	k__Bacteria|p__Firmicutes|c__Bacilli|o__Lactobacillales|f__Lactobacillaceae|g__Pediococcus	3.70771925139781E-6;-2.31836179397812E-5;-4.78988368133277E-4	345;1174;309	32;71;45	0.996779689181121;0.971746749264904;0.878554875953905	0.999808023053732;0.994555003200321;0.952323026426741	0.004036072033677433;-0.035417601856808104;-0.15280142245307055	miSeqRuns_UMCG-IBD-TIFN_Taxman_100Pc_GG13-PPI.txt;miSeqRuns_UMCG-IBD-TIFN_Taxman_100Pc_GG13-Reducing_stomach_acid2.txt;miSeqRuns_UMCG-IBD-TIFN_Taxman_100Pc_GG13-ZICPPI.txt	1828	148	Decreased	-0.089453	0.928722	0.607159	0.000100236	4.33744e-05	3.8544e-05	2.13282e-05	0.000450727	9.94271e-05	3.74355e-05	2.02255e-05	0	0	189	19	27	4	34	10	128	5	0	0.991726
PPI	Increased	k__Bacteria|p__Bacteroidetes|c__Bacteroidia|o__Bacteroidales|f__Bacteroidaceae	-0.00658102582470304;0.0064696210209973;-0.0146674098206735	345;1174;309	344;1170;307	0.730544802552882;0.519125324041003;0.493222421813034	0.971982850304901;0.901274647957303;0.832814430415186	-0.3444009127220399;0.6446942796784326;-0.6851925541001864	miSeqRuns_UMCG-IBD-TIFN_Taxman_100Pc_GG13-PPI.txt;miSeqRuns_UMCG-IBD-TIFN_Taxman_100Pc_GG13-Reducing_stomach_acid2.txt;miSeqRuns_UMCG-IBD-TIFN_Taxman_100Pc_GG13-ZICPPI.txt	1828	1821	Increased	0.0853243	0.932004	0.607159	0.0475513	0.0530792	0.0351219	0.0338823	0.0961512	0.087983	0.0532576	0.0492805	0.000423775	0	2128	208	288	98	240	59	1600	51	0	0.607608
PPI	Increased	k__Bacteria|p__Bacteroidetes|c__Bacteroidia|o__Bacteroidales|f__Bacteroidaceae|g__Bacteroides	-0.00658102582470304;0.0064696210209973;-0.0146674098206735	345;1174;309	344;1170;307	0.730544802552882;0.519125324041003;0.493222421813034	0.971982850304901;0.901274647957303;0.832814430415186	-0.3444009127220399;0.6446942796784326;-0.6851925541001864	miSeqRuns_UMCG-IBD-TIFN_Taxman_100Pc_GG13-PPI.txt;miSeqRuns_UMCG-IBD-TIFN_Taxman_100Pc_GG13-Reducing_stomach_acid2.txt;miSeqRuns_UMCG-IBD-TIFN_Taxman_100Pc_GG13-ZICPPI.txt	1828	1821	Increased	0.0853243	0.932004	0.607159	0.0475513	0.0530792	0.0351219	0.0338823	0.0961512	0.087983	0.0532576	0.0492805	0.000423775	0	2128	208	288	98	240	59	1600	51	0	0.607608
PPI	Decreased	k__Bacteria|p__Proteobacteria|c__Gammaproteobacteria|o__Enterobacteriales|f__Enterobacteriaceae|g__Salmonella|s__enterica	-1.94279536664186E-4;-6.70190527271108E-5;0.00153958939442533	345;1174;309	5;16;13	0.193213166076955;0.632703314597464;0.0346441001254606	0.700871400168005;0.960575763595147;0.398373776827212	-1.301132321474741;-0.477925382695253;2.1124939991800895	miSeqRuns_UMCG-IBD-TIFN_Taxman_100Pc_GG13-PPI.txt;miSeqRuns_UMCG-IBD-TIFN_Taxman_100Pc_GG13-Reducing_stomach_acid2.txt;miSeqRuns_UMCG-IBD-TIFN_Taxman_100Pc_GG13-ZICPPI.txt	1828	34	Decreased	-0.0797259	0.936455	0.607159	1.98757e-06	2.99877e-05	1.83438e-06	2.51515e-07	3.782e-06	0.000104542	1.061e-06	0	0	0	39	7	5	1	7	6	27	0	68.6404	0.0412206
PPI	Decreased	k__Bacteria|p__Proteobacteria|c__Gammaproteobacteria|o__Enterobacteriales|f__Enterobacteriaceae|g__Salmonella	-1.94279536664186E-4;-6.70190527271108E-5;0.00153958939442533	345;1174;309	5;16;13	0.193213166076955;0.632703314597464;0.0346441001254606	0.700871400168005;0.960575763595147;0.398373776827212	-1.301132321474741;-0.477925382695253;2.1124939991800895	miSeqRuns_UMCG-IBD-TIFN_Taxman_100Pc_GG13-PPI.txt;miSeqRuns_UMCG-IBD-TIFN_Taxman_100Pc_GG13-Reducing_stomach_acid2.txt;miSeqRuns_UMCG-IBD-TIFN_Taxman_100Pc_GG13-ZICPPI.txt	1828	34	Decreased	-0.0797259	0.936455	0.607159	1.98757e-06	2.99877e-05	1.83438e-06	2.51515e-07	3.782e-06	0.000104542	1.061e-06	0	0	0	39	7	5	1	7	6	27	0	68.6404	0.0412206
PPI	Increased	k__Bacteria|p__Firmicutes|c__Clostridia|o__Clostridiales|f__Peptostreptococcaceae|g__Clostridium|s__glycolicum	2.4840021869633E-4;-4.88374567155686E-5;-1.38359378178261E-4	345;1174;309	25;114;22	0.213634202281542;0.76933129144431;0.582689349622777	0.717351079230576;0.989908794585686;0.851498930510301	1.2436342567387402;-0.29324970842044756;-0.5494606679958843	miSeqRuns_UMCG-IBD-TIFN_Taxman_100Pc_GG13-PPI.txt;miSeqRuns_UMCG-IBD-TIFN_Taxman_100Pc_GG13-Reducing_stomach_acid2.txt;miSeqRuns_UMCG-IBD-TIFN_Taxman_100Pc_GG13-ZICPPI.txt	1828	161	Increased	0.0793596	0.936747	0.607159	2.54276e-06	2.15214e-06	2.67599e-06	2.19465e-06	3.33151e-06	1.188e-06	1.38945e-06	3.20392e-06	0	0	181	16	20	9	18	3	143	4	0	0.38132
PPI	Increased	k__Bacteria|p__Bacteroidetes|c__Bacteroidia|o__Bacteroidales|f__Prevotellaceae|g__Prevotella|s__copri	-5.32982434732441E-4;6.98803264970969E-4;6.00547773806757E-4	345;1174;309	186;752;151	0.224103852027702;0.944476303123222;0.181164972626629	0.725170591173581;0.992629209628975;0.643891847648107	-1.2156878559404323;0.06964489437675733;1.337176678317698	miSeqRuns_UMCG-IBD-TIFN_Taxman_100Pc_GG13-PPI.txt;miSeqRuns_UMCG-IBD-TIFN_Taxman_100Pc_GG13-Reducing_stomach_acid2.txt;miSeqRuns_UMCG-IBD-TIFN_Taxman_100Pc_GG13-ZICPPI.txt	1828	1089	Increased	0.0774483	0.938267	0.607159	0.0129314	0.0136805	0.0145038	0.0131107	0.0106657	0.0180632	0.00897226	0.00963031	0.000123895	0	1245	114	164	59	112	35	969	20	38.7403	0.195461
PPI	Increased	k__Bacteria|p__Proteobacteria|c__Gammaproteobacteria|o__Enterobacteriales|f__Enterobacteriaceae|g__Enterobacter|[s__cancerogenus/s__cloacae/s__ludwigii/s__amnigenus]	-1.136851268804E-4;-4.72498592205395E-5;3.89940246377493E-4	345;1174;309	3;18;6	0.35658568944699;0.69279894791484;0.0534384961951365	0.8450140495914;0.976275315759913;0.464914916897687	-0.9218905105326212;-0.3950595396211957;1.931360420584354	miSeqRuns_UMCG-IBD-TIFN_Taxman_100Pc_GG13-PPI.txt;miSeqRuns_UMCG-IBD-TIFN_Taxman_100Pc_GG13-Reducing_stomach_acid2.txt;miSeqRuns_UMCG-IBD-TIFN_Taxman_100Pc_GG13-ZICPPI.txt	1828	27	Increased	0.0769654	0.938651	0.607159	1.14726e-06	1.8698e-06	1.32693e-06	4.1798e-07	8.71025e-07	5.85465e-06	7.09301e-07	0	0	0	26	6	3	2	2	4	21	0	57.7183	0.0939407
PPI	Increased	k__Bacteria|p__Firmicutes|c__Clostridia|o__Clostridiales|f__Mogibacteriaceae	-0.0021357302944919;-3.84485099501639E-4;0.00419883867519899	345;1174;309	337;1166;266	0.407909399030403;0.827131695724573;0.138466172428617	0.864143059068868;0.990483578093088;0.598427046254707	-0.827578234192144;-0.2183817346802935;1.4815270867958328	miSeqRuns_UMCG-IBD-TIFN_Taxman_100Pc_GG13-PPI.txt;miSeqRuns_UMCG-IBD-TIFN_Taxman_100Pc_GG13-Reducing_stomach_acid2.txt;miSeqRuns_UMCG-IBD-TIFN_Taxman_100Pc_GG13-ZICPPI.txt	1828	1769	Increased	0.0745811	0.940548	0.607159	0.00171432	0.00195925	0.0019638	0.00218288	0.000949765	0.00203101	0.0014239	0.00144072	0.000664328	0	2050	199	283	98	208	52	1559	49	31.5522	0.232012
PPI	Decreased	k__Bacteria|p__Firmicutes|c__Erysipelotrichi|o__Erysipelotrichales|f__Erysipelotrichaceae|g__Clostridium|s__ramosum	5.10425724190552E-4;-2.75035515333127E-4;2.45039068812132E-4	345;1174;309	169;412;192	0.501832303324138;0.623796167322073;0.944393624292619	0.905474768021963;0.958196606344893;0.977110466499241	0.6716095399989752;-0.4904773307148027;0.06974876891089461	miSeqRuns_UMCG-IBD-TIFN_Taxman_100Pc_GG13-PPI.txt;miSeqRuns_UMCG-IBD-TIFN_Taxman_100Pc_GG13-Reducing_stomach_acid2.txt;miSeqRuns_UMCG-IBD-TIFN_Taxman_100Pc_GG13-ZICPPI.txt	1828	773	Decreased	-0.0726204	0.942108	0.607159	0.000829369	0.0018204	0.000490997	0.000300907	0.0023027	0.0051208	0.000859388	0.000887157	0	0	957	96	144	35	146	38	667	23	0	0.707789
PPI	Increased	k__Bacteria|p__Bacteroidetes|c__Bacteroidia|o__Bacteroidales|f__Porphyromonadaceae|g__Porphyromonas	6.49937620890445E-5;8.15214915129573E-5;-5.40771053305087E-4	345;1174;309	38;266;40	0.874220185946594;0.780444381039093;0.576848469702151	0.991109715557945;0.990483578093088;0.85046743809239	0.15830028199251275;0.2787399765382063;-0.557994016990981	miSeqRuns_UMCG-IBD-TIFN_Taxman_100Pc_GG13-PPI.txt;miSeqRuns_UMCG-IBD-TIFN_Taxman_100Pc_GG13-Reducing_stomach_acid2.txt;miSeqRuns_UMCG-IBD-TIFN_Taxman_100Pc_GG13-ZICPPI.txt	1828	344	Increased	0.0627367	0.949976	0.610873	3.08224e-05	1.70301e-05	3.25824e-05	2.12592e-05	5.22246e-05	1.34621e-05	6.42831e-06	1.30185e-05	0.00714479	1	390	26	36	20	36	4	318	2	0	0.814575
PPI	Decreased	k__Bacteria|p__Firmicutes|c__Bacilli|[o__Gemellales/o__Lactobacillales]	7.70556465203337E-5;6.95213969634559E-6;-2.39539013700382E-4	345;1174;309	3;14;9	0.334123549592564;0.907001985050769;0.163205259692823	0.818523457013772;0.990483578093088;0.634978675050539	0.9658413984570525;0.11682089532480266;-1.394372129833006	miSeqRuns_UMCG-IBD-TIFN_Taxman_100Pc_GG13-PPI.txt;miSeqRuns_UMCG-IBD-TIFN_Taxman_100Pc_GG13-Reducing_stomach_acid2.txt;miSeqRuns_UMCG-IBD-TIFN_Taxman_100Pc_GG13-ZICPPI.txt	1828	26	Decreased	-0.0600724	0.952098	0.610883	8.44006e-07	3.79048e-07	3.03879e-07	3.38384e-07	4.02017e-06	3.16667e-07	2.04498e-07	5.31373e-07	0.000271971	1	34	4	2	2	9	1	23	1	30.7278	0.236081
PPI	Increased	k__Bacteria|p__Proteobacteria|c__Gammaproteobacteria|o__Enterobacteriales|f__Enterobacteriaceae|g__Enterobacter|s__cloacae	-1.85863429502217E-4;4.20528954305237E-5;1.43521682948865E-4	345;1174;309	23;44;26	0.732924151119219;0.892811053997203;0.818991402674796	0.973371864020578;0.990483578093088;0.934523352328807	-0.3412383549880936;0.13474808439759414;0.22884241026613047	miSeqRuns_UMCG-IBD-TIFN_Taxman_100Pc_GG13-PPI.txt;miSeqRuns_UMCG-IBD-TIFN_Taxman_100Pc_GG13-Reducing_stomach_acid2.txt;miSeqRuns_UMCG-IBD-TIFN_Taxman_100Pc_GG13-ZICPPI.txt	1828	93	Increased	0.0538281	0.957072	0.612594	1.07627e-05	1.25594e-05	8.88089e-06	6.01326e-06	1.66027e-05	2.67477e-05	1.28926e-05	8.57467e-06	0	0	109	19	17	7	19	7	73	5	0	0.912072
PPI	Increased	k__Bacteria|p__Firmicutes|c__Bacilli|o__Lactobacillales|[f__Lactobacillaceae/f__Streptococcaceae]	-8.59403267049597E-5;2.19571397271653E-5;2.43861491305905E-5	345;1174;309	3;11;8	0.343367571975129;0.61883792335551;0.875593274482137	0.829637239970279;0.956365827304757;0.951657912158401	-0.9475323654453822;0.4974979852152861;0.15655791236034186	miSeqRuns_UMCG-IBD-TIFN_Taxman_100Pc_GG13-PPI.txt;miSeqRuns_UMCG-IBD-TIFN_Taxman_100Pc_GG13-Reducing_stomach_acid2.txt;miSeqRuns_UMCG-IBD-TIFN_Taxman_100Pc_GG13-ZICPPI.txt	1828	22	Increased	0.0514212	0.95899	0.612594	3.66116e-07	2.28333e-07	1.62828e-07	2.25253e-07	1.24969e-06	4.275e-07	3.85467e-07	0	0.00173731	1	26	4	3	1	5	3	18	0	0	0.55789
PPI	Increased	k__Bacteria|p__Bacteroidetes|c__Bacteroidia|o__Bacteroidales|f__Bacteroidaceae|g__Bacteroides|s__fragilis	0.00390476896666369;-0.00156064379666805;0.0026050094022934	345;1174;309	228;689;250	0.201475183044386;0.362836215245342;0.612284109566614	0.705204500290218;0.803013106846094;0.864682815857694	1.2773599907452682;-0.9099740122844009;0.5068157423965257	miSeqRuns_UMCG-IBD-TIFN_Taxman_100Pc_GG13-PPI.txt;miSeqRuns_UMCG-IBD-TIFN_Taxman_100Pc_GG13-Reducing_stomach_acid2.txt;miSeqRuns_UMCG-IBD-TIFN_Taxman_100Pc_GG13-ZICPPI.txt	1828	1167	Increased	0.034051	0.972836	0.618112	0.00156412	0.00291119	0.00106434	0.000320258	0.00407838	0.00746784	0.0013265	0.0025799	6.273e-05	0	1399	143	190	60	195	47	1014	36	26.3461	0.257251
PPI	Decreased	k__Bacteria|p__Proteobacteria|c__Betaproteobacteria|o__Burkholderiales|f__Oxalobacteraceae|g__Herbaspirillum	4.83655895247928E-5;-1.31257713223599E-4;5.69190681769173E-5	345;1174;309	4;18;1	0.771086111237697;0.215310950655568;0.0426635494671598	0.980620380595767;0.635948158654495;0.433481698073461	0.2909545094336323;-1.2390932927368223;2.026988884342363	miSeqRuns_UMCG-IBD-TIFN_Taxman_100Pc_GG13-PPI.txt;miSeqRuns_UMCG-IBD-TIFN_Taxman_100Pc_GG13-Reducing_stomach_acid2.txt;miSeqRuns_UMCG-IBD-TIFN_Taxman_100Pc_GG13-ZICPPI.txt	1828	23	Decreased	-0.0332229	0.973497	0.618112	9.39541e-07	1.70476e-07	1.06406e-06	0	0	1.76667e-07	1.25987e-06	4.94118e-07	0	0	24	2	3	0	0	1	21	1	65.0813	0.0570519
PPI	Increased	k__Bacteria|p__Actinobacteria|c__Actinobacteria|o__Bifidobacteriales|f__Bifidobacteriaceae|g__Gardnerella	-2.99610909740429E-4;-1.46794126960201E-4;9.39802555673296E-4	345;1174;309	8;64;19	0.334085072816132;0.594505458242428;0.0325629753348887	0.818523457013772;0.943088360564448;0.398373776827212	-0.9659182832523013;-0.5323184465817852;2.1374307161603596	miSeqRuns_UMCG-IBD-TIFN_Taxman_100Pc_GG13-PPI.txt;miSeqRuns_UMCG-IBD-TIFN_Taxman_100Pc_GG13-Reducing_stomach_acid2.txt;miSeqRuns_UMCG-IBD-TIFN_Taxman_100Pc_GG13-ZICPPI.txt	1828	91	Increased	0.032564	0.974022	0.618112	6.68034e-06	6.72808e-06	7.22916e-06	2.59016e-06	6.72112e-06	1.92745e-05	4.60489e-06	0	6.59093e-06	0	98	12	8	4	11	8	79	0	65.4213	0.0554676
PPI	Increased	k__Bacteria|p__Firmicutes|c__Clostridia|o__Clostridiales|f__Tissierellaceae|g__Anaerococcus	-4.10751529329151E-5;1.30135604747164E-4;-2.75852160079189E-4	345;1174;309	69;356;121	0.87809943537563;0.75124215819251;0.683713150746765	0.991109715557945;0.985809582315553;0.892405863692823	-0.1533789608474472;0.317001903121974;-0.40740146556218587	miSeqRuns_UMCG-IBD-TIFN_Taxman_100Pc_GG13-PPI.txt;miSeqRuns_UMCG-IBD-TIFN_Taxman_100Pc_GG13-Reducing_stomach_acid2.txt;miSeqRuns_UMCG-IBD-TIFN_Taxman_100Pc_GG13-ZICPPI.txt	1828	546	Increased	0.0199111	0.984114	0.622787	0.000118917	0.000144627	4.69027e-05	3.94755e-05	0.000569881	0.000429381	1.07266e-05	1.37384e-05	0	0	639	59	61	29	95	23	483	7	0	0.865198
PPI	Increased	k__Bacteria|p__Bacteroidetes|c__Bacteroidia|o__Bacteroidales|f__Rikenellaceae|g__human|s__gut_metagenome	-3.33839344892493E-4;-3.79888938617489E-4;8.20546892019463E-4	345;1174;309	31;119;9	0.919523348823008;0.870472729418005;0.639619948512035	0.991109715557945;0.990483578093088;0.879882120189379	-0.10103415285528332;-0.16305804936793933;0.46823024081120607	miSeqRuns_UMCG-IBD-TIFN_Taxman_100Pc_GG13-PPI.txt;miSeqRuns_UMCG-IBD-TIFN_Taxman_100Pc_GG13-Reducing_stomach_acid2.txt;miSeqRuns_UMCG-IBD-TIFN_Taxman_100Pc_GG13-ZICPPI.txt	1828	159	Increased	0.0179427	0.985685	0.622787	0.000436148	0.000287355	0.000501665	0.000271148	0.000113363	0.000241702	0.000461615	0.000372524	0	0	181	13	28	8	7	2	146	3	0	0.879979
PPI	Increased	k__Bacteria|p__Firmicutes|c__Clostridia|o__Clostridiales|f__Lachnospiraceae	-0.00432535688678245;2.97855080604842E-4;0.00452276712152408	345;1174;309	345;1174;309	0.832102187546602;0.981591092686982;0.842493209717622	0.991109715557945;0.996008961224;0.945758107012719	-0.21200621258901475;0.023074191144684883;0.19870538715627215	miSeqRuns_UMCG-IBD-TIFN_Taxman_100Pc_GG13-PPI.txt;miSeqRuns_UMCG-IBD-TIFN_Taxman_100Pc_GG13-Reducing_stomach_acid2.txt;miSeqRuns_UMCG-IBD-TIFN_Taxman_100Pc_GG13-ZICPPI.txt	1828	1828	Increased	0.0080853	0.993549	0.626392	0.260578	0.276984	0.240869	0.250677	0.291974	0.29221	0.307708	0.310139	0.0181574	0	2135	210	289	99	241	60	1605	51	0	0.95844
