# Supplementary material for: Proton pump inhibitors affect the gut microbiome
Source: HighWire-hosted journal article supplement (doi:10.1136/gutjnl-2015-310376), 2015-12-09
Supplement: gutjnl-2015-310376supp_table6.xls [file gutjnl-2015-310376supp_table6.xls]

## Sheet: SupplementaryTableS3_Cohort3_IB
Feature	Value	Direction	Coefficient	N	N not 0	P-value	Q-value
k__Bacteria|p__Actinobacteria|c__Actinobacteria|o__Actinomycetales|f__Micrococcaceae|g__Rothia|s__dentocariosa	PPI:Yes	Increased	0.00385613	345	121	2.25e-10	7.03e-07
k__Bacteria|p__Actinobacteria|c__Actinobacteria|o__Actinomycetales|f__Micrococcaceae|g__Rothia|s__mucilaginosa	PPI:Yes	Increased	0.00597283	345	198	1.58e-09	2.47e-06
k__Bacteria|p__Actinobacteria|c__Actinobacteria|o__Actinomycetales|f__Micrococcaceae|g__Rothia	PPI:Yes	Increased	0.00608833	345	228	6.17e-09	7.7e-06
k__Bacteria|p__Actinobacteria|c__Actinobacteria|o__Actinomycetales|f__Micrococcaceae	PPI:Yes	Increased	0.00606273	345	230	7.45e-09	7.75e-06
k__Bacteria|p__Firmicutes|c__Bacilli|o__Lactobacillales|f__Streptococcaceae|g__Streptococcus	PPI:Yes	Increased	0.0645042	345	344	1.79e-08	1.6e-05
k__Bacteria|p__Firmicutes|c__Bacilli|o__Lactobacillales|f__Streptococcaceae	PPI:Yes	Increased	0.0642796	345	344	2.17e-08	1.69e-05
k__Bacteria|p__Firmicutes|c__Bacilli	PPI:Yes	Increased	0.0674135	345	344	4.23e-08	2.75e-05
k__Bacteria|p__Actinobacteria|c__Actinobacteria|o__Actinomycetales	PPI:Yes	Increased	0.0116639	345	337	4.41e-08	2.75e-05
k__Bacteria|p__Firmicutes|c__Bacilli|o__Lactobacillales|f__Enterococcaceae|g__Enterococcus	PPI:Yes	Increased	0.00406611	345	172	9.58e-08	5.43e-05
k__Bacteria|p__Firmicutes|c__Bacilli|o__Lactobacillales|f__Enterococcaceae	PPI:Yes	Increased	0.00403822	345	174	1.31e-07	6.82e-05
k__Bacteria|p__Firmicutes|c__Bacilli|o__Lactobacillales	PPI:Yes	Increased	0.0612537	345	344	3.71e-07	0.000128769
k__Bacteria|p__Firmicutes|c__Clostridia|o__Clostridiales|f__Veillonellaceae|g__Veillonella	PPI:Yes	Increased	0.00675381	345	239	7.94e-06	0.0018342
k__Bacteria|p__Firmicutes|c__Clostridia|o__Clostridiales|f__Veillonellaceae|g__Veillonella|s__parvula	PPI:Yes	Increased	0.00347439	345	145	1.33e-05	0.00244235
k__Bacteria|p__Firmicutes|c__Clostridia|o__Clostridiales|f__Veillonellaceae|g__Veillonella|s__dispar	PPI:Yes	Increased	0.00434337	345	199	0.000192814	0.0200526
k__Bacteria|p__Actinobacteria|c__Actinobacteria|o__Actinomycetales|f__Actinomycetaceae	PPI:Yes	Increased	0.0065204	345	337	0.000604222	0.0396878
k__Bacteria|p__Actinobacteria|c__Actinobacteria|o__Actinomycetales|f__Actinomycetaceae|g__Actinomyces	PPI:Yes	Increased	0.0063226	345	335	0.000673431	0.0417381
k__Bacteria|p__Firmicutes|c__Bacilli|o__Lactobacillales|f__Lactobacillaceae|g__Lactobacillus|s__salivarius	PPI:Yes	Increased	0.0024183	345	24	0.000745527	0.0419107
k__Bacteria|p__Firmicutes|c__Bacilli|o__Lactobacillales|f__Streptococcaceae|g__Streptococcus|s__equi	PPI:Yes	Increased	0.000224803	345	3	0.000887248	0.0485651
k__Bacteria|p__Firmicutes|c__Bacilli|o__Lactobacillales|f__Aerococcaceae	PPI:Yes	Increased	0.00228698	345	173	0.00115191	0.0589172
k__Bacteria|p__Proteobacteria|c__Gammaproteobacteria|o__Pasteurellales|f__Pasteurellaceae|g__Haemophilus	PPI:Yes	Increased	0.00425903	345	188	0.00163395	0.0772412
k__Bacteria|p__Proteobacteria|c__Gammaproteobacteria|o__Pasteurellales|f__Pasteurellaceae|g__Haemophilus|s__parainfluenzae	PPI:Yes	Increased	0.00425903	345	188	0.00163395	0.0772412
k__Bacteria|p__Firmicutes|c__Clostridia|o__Clostridiales|f__Peptostreptococcaceae|g__Clostridium|s__ghonii	PPI:Yes	Increased	0.00023382	345	2	0.00243302	0.101893
k__Bacteria|p__Actinobacteria|c__Actinobacteria|o__Bifidobacteriales|f__Bifidobacteriaceae|g__Scardovia	PPI:Yes	Increased	0.0014204	345	89	0.00261487	0.107128
k__Bacteria|p__Firmicutes|c__Bacilli|o__Lactobacillales|f__Lactobacillaceae|g__Lactobacillus|s__acidipiscis	PPI:Yes	Increased	0.00216962	345	23	0.00267922	0.107128
k__Bacteria|p__Proteobacteria|c__Gammaproteobacteria|o__Pasteurellales	PPI:Yes	Increased	0.0041035	345	193	0.00269537	0.107128
k__Bacteria|p__Proteobacteria|c__Gammaproteobacteria|o__Pasteurellales|f__Pasteurellaceae	PPI:Yes	Increased	0.0041035	345	193	0.00269537	0.107128
k__Bacteria|p__Actinobacteria|c__Actinobacteria|o__Bifidobacteriales|f__Bifidobacteriaceae|g__Alloscardovia	PPI:Yes	Increased	0.00253859	345	84	0.00331251	0.123773
k__Bacteria|p__Firmicutes|c__Clostridia|o__Clostridiales|f__Peptostreptococcaceae|g__Clostridium|s__difficile	PPI:Yes	Increased	0.00110499	345	77	0.00387768	0.136705
k__Bacteria|p__Firmicutes|c__Bacilli|o__Lactobacillales|f__Streptococcaceae|g__Streptococcus|s__sobrinus	PPI:Yes	Increased	0.00170159	345	14	0.00401464	0.138405
k__Bacteria|p__Firmicutes|c__Bacilli|o__Lactobacillales|f__Enterococcaceae|g__Vagococcus	PPI:Yes	Increased	0.000228288	345	3	0.00443169	0.150292
k__Bacteria|p__Proteobacteria|c__Gammaproteobacteria|o__Xanthomonadales	PPI:Yes	Increased	0.000251492	345	4	0.00472886	0.155306
k__Bacteria|p__Proteobacteria|c__Gammaproteobacteria|o__Xanthomonadales|f__Xanthomonadaceae	PPI:Yes	Increased	0.000251492	345	4	0.00472886	0.155306
k__Bacteria|p__Firmicutes|c__Clostridia	PPI:Yes	Decreased	-0.0545087	345	345	0.005194	0.163446
k__Bacteria|p__Firmicutes|c__Clostridia|o__Clostridiales	PPI:Yes	Decreased	-0.0544822	345	345	0.00521848	0.163446
k__Bacteria|p__Actinobacteria|c__Coriobacteriia|o__Coriobacteriales|f__Coriobacteriaceae|g__Olsenella	PPI:Yes	Increased	0.000708715	345	25	0.00635064	0.188705
k__Bacteria|p__Firmicutes|c__Clostridia|o__Clostridiales|f__Lachnospiraceae|g__Oribacterium	PPI:Yes	Increased	0.000874413	345	51	0.00860762	0.236615
k__Bacteria|p__Firmicutes|c__Bacilli|o__Lactobacillales|f__Lactobacillaceae|g__Lactobacillus|[s__vaginalis/s__reuteri]	PPI:Yes	Increased	0.00026904	345	2	0.00955941	0.249585
k__Bacteria|p__Firmicutes|c__Bacilli|o__Lactobacillales|f__Enterococcaceae|g__Enterococcus|s__haemoperoxidus	PPI:Yes	Increased	0.000357815	345	8	0.00985249	0.254048
k__Bacteria|p__Bacteroidetes|c__Bacteroidia|o__Bacteroidales|[f__Bacteroidaceae/f__Rikenellaceae]	PPI:Yes	Decreased	-0.00242124	345	181	0.0104763	0.259413
k__Bacteria|p__Bacteroidetes|c__Bacteroidia|o__Bacteroidales|f__Odoribacteraceae|g__Odoribacter	PPI:Yes	Decreased	-0.00415512	345	223	0.0111059	0.268567
k__Bacteria|p__Firmicutes|c__Bacilli|o__Lactobacillales|f__Lactobacillaceae|g__Lactobacillus|s__reuteri	PPI:Yes	Increased	0.00487809	345	26	0.0137456	0.29475
k__Bacteria|p__Proteobacteria|c__Alphaproteobacteria|o__Rhizobiales|f__Brucellaceae	PPI:Yes	Increased	0.000158733	345	1	0.0163481	0.325261
k__Bacteria|p__Proteobacteria|c__Alphaproteobacteria|o__Rhizobiales|f__Brucellaceae|g__Ochrobactrum	PPI:Yes	Increased	0.000158733	345	1	0.0163481	0.325261
k__Bacteria|p__Proteobacteria|c__Alphaproteobacteria|o__Caulobacterales|f__Caulobacteraceae	PPI:Yes	Increased	0.00011224	345	1	0.0163481	0.325261
k__Bacteria|p__Firmicutes|c__Clostridia|o__Clostridiales|f__Peptostreptococcaceae|g__Clostridium|s__sordellii	PPI:Yes	Increased	0.000414219	345	4	0.0163673	0.325261
k__Bacteria|p__Firmicutes|c__Clostridia|o__Clostridiales|f__Clostridiaceae|g__Clostridium|s__perfringens	PPI:Yes	Increased	0.00244807	345	48	0.0169252	0.326975
k__Bacteria|p__Firmicutes|c__Bacilli|o__Lactobacillales|f__Lactobacillaceae|g__Lactobacillus	PPI:Yes	Increased	0.00469385	345	258	0.0173458	0.333039
k__Bacteria|p__Firmicutes|c__Erysipelotrichi|o__Erysipelotrichales|f__Erysipelotrichaceae|g__Eubacterium|s__cylindroides	PPI:Yes	Increased	0.0121118	345	25	0.017427	0.333572
k__Bacteria|p__Actinobacteria|c__Coriobacteriia|o__Coriobacteriales|f__Coriobacteriaceae|g__Olsenella|s__uli	PPI:Yes	Increased	0.000378725	345	13	0.0179407	0.337512
k__Bacteria|p__Actinobacteria|c__Actinobacteria|o__Bifidobacteriales|f__Bifidobacteriaceae|g__Bifidobacterium|s__bifidum	PPI:Yes	Increased	0.00964115	345	144	0.0180703	0.338459
k__Bacteria|p__Firmicutes|c__Bacilli|o__Lactobacillales|f__Lactobacillaceae|g__Lactobacillus|s__vaginalis	PPI:Yes	Increased	0.000456695	345	3	0.0185884	0.343171
k__Bacteria|p__Proteobacteria|c__Gammaproteobacteria|o__Enterobacteriales|f__Enterobacteriaceae|g__Raoultella|s__ornithinolytica	PPI:Yes	Increased	9.81e-05	345	1	0.0187902	0.344737
k__Bacteria|p__Firmicutes|c__Bacilli|o__Lactobacillales|f__Lactobacillaceae	PPI:Yes	Increased	0.00473248	345	264	0.0194871	0.346365
k__Bacteria|p__Firmicutes|c__Clostridia|o__Clostridiales|f__Veillonellaceae|g__Selenomonas|s__ruminantium	PPI:Yes	Increased	0.000108076	345	1	0.0195215	0.346365
k__Bacteria|p__Firmicutes|c__Bacilli|o__Lactobacillales|f__Streptococcaceae|g__Lactococcus|s__garvieae	PPI:Yes	Increased	0.00109141	345	4	0.0198196	0.3474
k__Bacteria|p__Bacteroidetes|c__Bacteroidia|o__Bacteroidales|f__Porphyromonadaceae|g__Dysgonomonas	PPI:Yes	Increased	0.000104947	345	1	0.0225883	0.37758
k__Bacteria|p__Firmicutes|c__Bacilli|o__Lactobacillales|f__Lactobacillaceae|g__Lactobacillus|s__zeae	PPI:Yes	Increased	0.00303171	345	83	0.0232796	0.381833
k__Bacteria|p__Firmicutes|c__Bacilli|o__Lactobacillales|f__Leuconostocaceae	PPI:Yes	Increased	0.00219883	345	179	0.023375	0.381833
k__Bacteria|p__Firmicutes|c__Erysipelotrichi|o__Erysipelotrichales|f__Erysipelotrichaceae|g__Coprobacillus	PPI:Yes	Increased	0.00415909	345	265	0.0275168	0.413747
k__Bacteria|p__Firmicutes|c__Bacilli|o__Lactobacillales|f__Leuconostocaceae|g__Oenococcus|s__oeni	PPI:Yes	Increased	0.000118054	345	1	0.0291041	0.426314
k__Bacteria|p__Bacteroidetes|c__Bacteroidia|o__Bacteroidales|f__Rikenellaceae|g__Alistipes	PPI:Yes	Decreased	-0.0111674	345	313	0.0295949	0.429189
k__Bacteria|p__Bacteroidetes|c__Bacteroidia|o__Bacteroidales|f__Barnesiellaceae|g__Barnesiella|s__intestinihominis	PPI:Yes	Decreased	-0.00104202	345	111	0.0296085	0.429189
k__Bacteria|p__Firmicutes|c__Bacilli|o__Bacillales|f__Planococcaceae|g__Ureibacillus	PPI:Yes	Increased	8.69e-05	345	1	0.0347892	0.467867
k__Bacteria|p__Actinobacteria|c__Actinobacteria|o__Actinomycetales|f__Corynebacteriaceae|g__Corynebacterium|s__kroppenstedtii	PPI:Yes	Increased	8.49e-05	345	1	0.0352174	0.470571
k__Bacteria|p__Bacteroidetes|c__Bacteroidia|o__Bacteroidales|f__Rikenellaceae|g__Alistipes|s__putredinis	PPI:Yes	Decreased	-0.00895451	345	258	0.0413786	0.515375
k__Bacteria|p__Firmicutes|c__Bacilli|o__Lactobacillales|f__Lactobacillaceae|g__Lactobacillus|s__delbrueckii	PPI:Yes	Increased	0.00321278	345	56	0.0440661	0.525907
k__Bacteria|p__Firmicutes|c__Clostridia|o__Clostridiales|f__Ruminococcaceae|g__Ruminococcus|s__callidus	PPI:Yes	Decreased	-0.00202598	345	137	0.0441627	0.525907
k__Bacteria|p__Firmicutes|c__Bacilli|o__Lactobacillales|f__Aerococcaceae|g__Facklamia	PPI:Yes	Decreased	-0.000236472	345	5	0.0457385	0.535394
k__Bacteria|p__Firmicutes|c__Clostridia|o__Clostridiales|f__Veillonellaceae|g__Veillonella|[s__parvula/s__dispar]	PPI:Yes	Increased	0.000507717	345	29	0.0498557	0.553348
k__Bacteria|p__Firmicutes|c__Erysipelotrichi|o__Erysipelotrichales|f__Erysipelotrichaceae	PPI:Yes	Increased	0.0300773	345	345	0.0508599	0.559728
k__Bacteria|p__Proteobacteria|c__Gammaproteobacteria|o__Cardiobacteriales|f__Cardiobacteriaceae|g__Cardiobacterium	PPI:Yes	Increased	0.000201452	345	7	0.051142	0.560855
k__Bacteria|p__Firmicutes|c__Bacilli|o__Lactobacillales|f__Leuconostocaceae|g__Leuconostoc	PPI:Yes	Increased	0.00182539	345	167	0.0516019	0.561624
k__Bacteria|p__Firmicutes|c__Clostridia|o__Clostridiales|f__Dehalobacteriaceae|g__Dehalobacterium	PPI:Yes	Decreased	-0.00197086	345	179	0.0518087	0.561624
k__Bacteria|p__Proteobacteria|c__Gammaproteobacteria|o__Enterobacteriales|f__Enterobacteriaceae|[g__Serratia/g__Raoultella]	PPI:Yes	Increased	8.8e-05	345	1	0.0537928	0.56829
k__Bacteria|p__Firmicutes|c__Bacilli|o__Lactobacillales|f__Lactobacillaceae|g__Lactobacillus|s__pontis	PPI:Yes	Increased	8.23e-05	345	1	0.0550974	0.576859
k__Bacteria|p__Firmicutes|c__Bacilli|o__Gemellales	PPI:Yes	Increased	0.00175075	345	223	0.0553379	0.577837
k__Bacteria|p__Proteobacteria|c__Alphaproteobacteria|o__Rickettsiales|f__mitochondria|g__Oenothera|s__berteroana	PPI:Yes	Increased	8.34e-05	345	1	0.055376	0.577837
k__Bacteria|p__Bacteroidetes|c__Bacteroidia|o__Bacteroidales|f__Barnesiellaceae|g__Barnesiella	PPI:Yes	Decreased	-0.000921064	345	117	0.0561382	0.57997
k__Bacteria|p__Firmicutes|c__Bacilli|o__Lactobacillales|f__Lactobacillaceae|g__Lactobacillus|s__mucosae	PPI:Yes	Increased	0.00333991	345	13	0.059708	0.594403
k__Bacteria|p__Firmicutes|c__Bacilli|o__Gemellales|f__Gemellaceae	PPI:Yes	Increased	0.00170717	345	218	0.0606553	0.597726
k__Bacteria|p__Firmicutes|c__Clostridia|o__Clostridiales|f__Lachnospiraceae|g__Blautia|s__obeum	PPI:Yes	Decreased	-0.00843439	345	336	0.0606839	0.597726
k__Bacteria|p__Firmicutes|c__Bacilli|o__Lactobacillales|f__Streptococcaceae|g__Streptococcus|s__alactolyticus	PPI:Yes	Increased	0.0006376	345	8	0.0616454	0.603316
k__Bacteria|p__Firmicutes|c__Clostridia|o__Clostridiales|f__Ruminococcaceae|g__Gemmiger|s__formicilis	PPI:Yes	Decreased	-0.00161815	345	220	0.0647476	0.616989
k__Bacteria|p__Proteobacteria|c__Alphaproteobacteria|o__Rickettsiales|f__mitochondria|g__Lupinus|s__luteus	PPI:Yes	Increased	0.000272526	345	3	0.065384	0.619979
k__Bacteria|p__Firmicutes|c__Bacilli|o__Lactobacillales|f__Streptococcaceae|g__Streptococcus|s__luteciae	PPI:Yes	Increased	0.004637	345	45	0.0740914	0.642696
k__Bacteria|p__Firmicutes|c__Bacilli|o__Lactobacillales|f__Lactobacillaceae|g__Lactobacillus|s__plantarum	PPI:Yes	Increased	0.000899404	345	51	0.0770058	0.654149
k__Bacteria|p__Actinobacteria|c__Coriobacteriia|o__Coriobacteriales|f__Coriobacteriaceae|g__Atopobium	PPI:Yes	Increased	0.00127249	345	170	0.077156	0.654149
k__Bacteria|p__Proteobacteria|c__Alphaproteobacteria|o__Rickettsiales|f__mitochondria|g__Oryza|s__sativa_Indica_Group	PPI:Yes	Increased	9.74e-05	345	2	0.0781736	0.657417
k__Bacteria|p__Firmicutes|c__Clostridia|o__Clostridiales|[f__Ruminococcaceae/f__[Mogibacteriaceae]]	PPI:Yes	Decreased	-0.00470287	345	306	0.0798809	0.66907
k__Bacteria|p__Firmicutes|c__Bacilli|o__Lactobacillales|f__Streptococcaceae|g__Streptococcus|s__anginosus	PPI:Yes	Increased	0.0011615	345	154	0.0845211	0.677907
k__Bacteria|p__Firmicutes|c__Clostridia|o__Clostridiales|f__Dehalobacteriaceae	PPI:Yes	Decreased	-0.00181198	345	180	0.0878871	0.687237
k__Bacteria|p__Firmicutes|c__Clostridia|o__Clostridiales|f__Peptostreptococcaceae	PPI:Yes	Increased	0.0196598	345	343	0.0946742	0.71957
k__Bacteria|p__Bacteroidetes|c__Bacteroidia|o__Bacteroidales|f__Rikenellaceae|g__Alistipes|s__indistinctus	PPI:Yes	Decreased	-0.00166478	345	139	0.0955939	0.720418
k__Bacteria|p__Proteobacteria|c__Gammaproteobacteria|o__Enterobacteriales|f__Enterobacteriaceae|g__Escherichia	PPI:Yes	Increased	0.00354125	345	255	0.0977589	0.726793
k__Bacteria|p__Proteobacteria|c__Gammaproteobacteria|o__Enterobacteriales|f__Enterobacteriaceae|g__Escherichia|s__coli	PPI:Yes	Increased	0.00354125	345	255	0.0977589	0.726793
k__Bacteria|p__Proteobacteria|c__Gammaproteobacteria|o__Enterobacteriales|f__Enterobacteriaceae	PPI:Yes	Increased	0.00446532	345	281	0.100201	0.731293
k__Bacteria|p__Bacteroidetes|c__Bacteroidia|o__Bacteroidales|f__Barnesiellaceae	PPI:Yes	Decreased	-0.00747427	345	281	0.105393	0.74886
k__Bacteria|p__Actinobacteria|c__Actinobacteria|o__Actinomycetales|f__Microbacteriaceae|g__Leucobacter	PPI:Yes	Increased	0.000117666	345	2	0.108331	0.758209
k__Bacteria|p__Firmicutes|c__Clostridia|o__Clostridiales|f__Ruminococcaceae|[g__Gemmiger/g__Subdoligranulum]	PPI:Yes	Decreased	-0.000658865	345	108	0.108573	0.758673
k__Bacteria|p__Firmicutes|c__Bacilli|o__Lactobacillales|f__Aerococcaceae|g__Abiotrophia|s__defectiva	PPI:Yes	Increased	0.000404143	345	20	0.112044	0.770585
k__Bacteria|p__Firmicutes|c__Clostridia|o__Clostridiales|f__Lachnospiraceae|g__Coprococcus|s__eutactus	PPI:Yes	Decreased	-0.0142701	345	235	0.116838	0.779756
k__Bacteria|p__Actinobacteria|c__Coriobacteriia|o__Coriobacteriales|f__Coriobacteriaceae|g__Olsenella|s__profusa	PPI:Yes	Increased	0.00032999	345	12	0.118637	0.78382
k__Bacteria|p__Bacteroidetes|c__Bacteroidia|o__Bacteroidales|f__Rikenellaceae	PPI:Yes	Decreased	-0.0133065	345	335	0.119609	0.78382
k__Bacteria|p__Firmicutes|c__Clostridia|o__Clostridiales|f__Tissierellaceae|g__ph2	PPI:Yes	Increased	0.00040754	345	18	0.125224	0.798978
k__Bacteria|p__Firmicutes|c__Bacilli|o__Lactobacillales|f__Leuconostocaceae|g__Weissella|[s__hellenica/s__confusa]	PPI:Yes	Increased	0.00026853	345	16	0.127168	0.803164
k__Bacteria|p__Actinobacteria|c__Actinobacteria|[o__Bifidobacteriales/o__Actinomycetales]	PPI:Yes	Increased	0.000150926	345	4	0.130454	0.810787
k__Bacteria|p__Bacteroidetes|c__Bacteroidia|o__Bacteroidales|f__Porphyromonadaceae|g__Parabacteroides|s__gordonii	PPI:Yes	Increased	0.000433553	345	12	0.131961	0.81207
k__Bacteria|p__Proteobacteria|c__Alphaproteobacteria|o__Rickettsiales	PPI:Yes	Increased	0.00046109	345	30	0.132842	0.81399
k__Bacteria|p__Proteobacteria|c__Alphaproteobacteria|o__Rickettsiales|f__mitochondria	PPI:Yes	Increased	0.00046109	345	30	0.132842	0.81399
k__Bacteria|p__Proteobacteria|c__Gammaproteobacteria|o__Enterobacteriales|f__Enterobacteriaceae|[g__Escherichia/g__Shigella]	PPI:Yes	Decreased	-0.00122704	345	81	0.135164	0.818064
k__Bacteria|p__Synergistetes|c__Synergistia|o__Synergistales|f__Synergistaceae|g__Synergistes	PPI:Yes	Increased	0.000493215	345	13	0.136337	0.822771
k__Bacteria|p__Bacteroidetes|c__Bacteroidia|o__Bacteroidales|f__Odoribacteraceae	PPI:Yes	Decreased	-0.00330555	345	252	0.146212	0.848667
k__Bacteria|p__Firmicutes|c__Clostridia|o__Clostridiales|f__Veillonellaceae|g__Selenomonas	PPI:Yes	Increased	0.000128941	345	4	0.152724	0.863855
k__Bacteria|p__Firmicutes|c__Bacilli|o__Bacillales|f__Bacillaceae|g__Bacillus|s__flexus	PPI:Yes	Increased	0.000192211	345	10	0.15521	0.867018
k__Bacteria|p__Firmicutes|c__Bacilli|o__Bacillales|f__Staphylococcaceae|g__Staphylococcus|s__epidermidis	PPI:Yes	Increased	0.000255093	345	9	0.157651	0.867497
k__Bacteria|p__Firmicutes|c__Clostridia|o__Clostridiales|f__Lachnospiraceae|g__Ruminococcus|s__torques	PPI:Yes	Decreased	-0.00534255	345	278	0.158845	0.870994
k__Bacteria|p__Firmicutes|c__Erysipelotrichi|o__Erysipelotrichales|f__Erysipelotrichaceae|g__Catenibacterium	PPI:Yes	Increased	0.000474552	345	122	0.159191	0.871432
k__Bacteria|p__Proteobacteria|c__Gammaproteobacteria|o__Enterobacteriales|f__Enterobacteriaceae|g__Erwinia	PPI:Yes	Decreased	-0.000354514	345	11	0.160091	0.873226
k__Bacteria|p__Firmicutes|c__Clostridia|o__Clostridiales|f__Ruminococcaceae	PPI:Yes	Decreased	-0.0282674	345	345	0.160904	0.875364
k__Bacteria|p__Firmicutes|c__Clostridia|o__Clostridiales|f__Lachnospiraceae|[g__Dorea/g__Roseburia]	PPI:Yes	Decreased	-0.000311654	345	18	0.161224	0.875583
k__Bacteria|p__Firmicutes|c__Bacilli|o__Lactobacillales|f__Lactobacillaceae|g__Lactobacillus|s__manihotivorans	PPI:Yes	Increased	0.000115293	345	2	0.163528	0.881203
k__Bacteria|p__Proteobacteria|c__Gammaproteobacteria|o__Enterobacteriales|f__Enterobacteriaceae|[g__Klebsiella/g__Pantoea/g__Enterobacter]	PPI:Yes	Increased	0.000119796	345	3	0.163945	0.881203
k__Bacteria|p__Proteobacteria|c__Gammaproteobacteria	PPI:Yes	Increased	0.00516495	345	310	0.164925	0.884895
k__Bacteria|p__Firmicutes|c__Erysipelotrichi|o__Erysipelotrichales|f__Erysipelotrichaceae|g__Bulleidia	PPI:Yes	Decreased	-0.000952083	345	187	0.16601	0.889002
k__Bacteria|p__Actinobacteria|c__Coriobacteriia|o__Coriobacteriales|f__Coriobacteriaceae|g__Atopobium|s__rimae	PPI:Yes	Increased	0.000483445	345	41	0.167046	0.889321
k__Bacteria|p__Firmicutes|c__Clostridia|o__Clostridiales|f__Lachnospiraceae|g__Coprococcus	PPI:Yes	Decreased	-0.00914194	345	345	0.169652	0.891566
k__Bacteria|p__Proteobacteria|c__Gammaproteobacteria|o__Enterobacteriales|f__Enterobacteriaceae|[g__Klebsiella/g__Citrobacter]	PPI:Yes	Decreased	-0.000193971	345	6	0.169865	0.891566
k__Bacteria|p__Firmicutes|c__Bacilli|o__Bacillales|f__Planococcaceae	PPI:Yes	Increased	0.000720177	345	110	0.170257	0.891566
k__Bacteria|p__Fusobacteria|c__Fusobacteriia|o__Fusobacteriales|f__Leptotrichiaceae|g__Leptotrichia	PPI:Yes	Increased	0.000209319	345	7	0.171976	0.894427
k__Bacteria|p__Firmicutes|c__Bacilli|o__Bacillales|f__Staphylococcaceae|g__Staphylococcus|[s__aureus/s__epidermidis]	PPI:Yes	Increased	0.000306002	345	19	0.172084	0.894427
k__Bacteria|p__Proteobacteria|c__Gammaproteobacteria|o__Enterobacteriales|f__Enterobacteriaceae|g__Enterobacter|s__asburiae	PPI:Yes	Decreased	-0.000453219	345	7	0.176829	0.899189
k__Bacteria|p__Proteobacteria|c__Gammaproteobacteria|o__Enterobacteriales|f__Enterobacteriaceae|g__Trabulsiella	PPI:Yes	Decreased	-0.000276033	345	7	0.181466	0.911714
k__Bacteria|p__Firmicutes|c__Bacilli|o__Lactobacillales|f__Leuconostocaceae|g__Weissella	PPI:Yes	Increased	0.000424521	345	31	0.183541	0.914738
k__Bacteria|p__Bacteroidetes|c__Bacteroidia|o__Bacteroidales|f__Rikenellaceae|g__Alistipes|s__onderdonkii	PPI:Yes	Decreased	-0.00450865	345	244	0.18474	0.914738
k__Bacteria|p__Bacteroidetes|c__Bacteroidia|o__Bacteroidales|f__Bacteroidaceae|g__Bacteroides|s__plebeius	PPI:Yes	Decreased	-0.00825001	345	64	0.185329	0.915602
k__Bacteria|p__Proteobacteria|c__Gammaproteobacteria|o__Enterobacteriales|f__Enterobacteriaceae|g__Enterobacter|s__cancerogenus	PPI:Yes	Decreased	-0.000298647	345	4	0.185468	0.915602
k__Bacteria|p__Firmicutes|c__Clostridia|o__Clostridiales|f__Lachnospiraceae|g__Blautia	PPI:Yes	Decreased	-0.021288	345	345	0.186451	0.918273
k__Bacteria|p__Firmicutes|c__Clostridia|o__Clostridiales|f__Lachnospiraceae|[g__Blautia/g__Anaerostipes]	PPI:Yes	Decreased	-0.00235749	345	119	0.187458	0.918419
k__Bacteria|p__Firmicutes|c__Clostridia|o__Clostridiales|f__Lachnospiraceae|g__Clostridium|s__indolis	PPI:Yes	Increased	9.92e-05	345	3	0.188533	0.91962
k__Bacteria|p__Firmicutes|c__Clostridia|o__Clostridiales|f__Lachnospiraceae|g__Clostridium|s__hathewayi	PPI:Yes	Decreased	-0.000167344	345	6	0.190866	0.923446
k__Bacteria|p__Firmicutes|c__Bacilli|o__Lactobacillales|f__Carnobacteriaceae	PPI:Yes	Increased	0.00113875	345	204	0.191573	0.923458
k__Bacteria|p__Firmicutes|c__Clostridia|o__Clostridiales|f__Peptostreptococcaceae|g__Clostridium|s__glycolicum	PPI:Yes	Increased	0.000269246	345	25	0.192272	0.923458
k__Bacteria|p__Bacteroidetes|c__Bacteroidia|o__Bacteroidales|f__Bacteroidaceae|g__Bacteroides|s__uniformis	PPI:Yes	Decreased	-0.00327003	345	273	0.196588	0.92722
k__Bacteria|p__Firmicutes|c__Clostridia|o__Clostridiales|f__Lachnospiraceae|g__Ruminococcus|s__lactaris	PPI:Yes	Decreased	-0.00111717	345	124	0.199462	0.932317
k__Bacteria|p__Bacteroidetes|c__Bacteroidia|o__Bacteroidales|f__S24-7	PPI:Yes	Decreased	-0.000467072	345	155	0.20422	0.939776
k__Bacteria|p__Proteobacteria|c__Deltaproteobacteria|o__Desulfovibrionales|f__Desulfovibrionaceae|g__Desulfovibrio|s__D168	PPI:Yes	Decreased	-0.00353177	345	22	0.208922	0.944247
k__Bacteria|p__Firmicutes|c__Erysipelotrichi|o__Erysipelotrichales|f__Erysipelotrichaceae|g__Eubacterium	PPI:Yes	Increased	0.0203324	345	328	0.210353	0.944714
k__Bacteria|p__Proteobacteria|c__Gammaproteobacteria|o__Enterobacteriales|f__Enterobacteriaceae|[g__Klebsiella/g__Enterobacter/g__Pantoea]	PPI:Yes	Decreased	-0.000178929	345	4	0.212409	0.944714
k__Bacteria|p__Actinobacteria|c__Coriobacteriia|o__Coriobacteriales|f__Coriobacteriaceae|g__Eggerthella	PPI:Yes	Increased	0.00313783	345	232	0.213127	0.945123
k__Archaea|p__Euryarchaeota|c__Methanobacteria|o__Methanobacteriales|f__Methanobacteriaceae|g__Methanosphaera	PPI:Yes	Increased	0.00534252	345	37	0.215813	0.948346
k__Bacteria|p__Firmicutes|c__Clostridia|o__Clostridiales|f__Clostridiaceae|g__Clostridium|s__septicum	PPI:Yes	Decreased	-0.000167845	345	14	0.220578	0.953853
k__Bacteria|p__Proteobacteria|c__Gammaproteobacteria|o__Enterobacteriales|f__Enterobacteriaceae|g__Enterobacter|[s__hormaechei/s__asburiae]	PPI:Yes	Increased	7.42e-05	345	2	0.224247	0.959999
k__Bacteria|p__Firmicutes|c__Bacilli|o__Lactobacillales|f__Lactobacillaceae|g__Lactobacillus|s__brevis	PPI:Yes	Increased	0.000123407	345	4	0.226597	0.962939
k__Bacteria|p__Firmicutes|c__Clostridia|o__Clostridiales|f__Christensenellaceae|g__Christensenella	PPI:Yes	Decreased	-0.000938902	345	162	0.226693	0.962939
k__Bacteria|p__Proteobacteria|c__Deltaproteobacteria|o__Desulfovibrionales|f__Desulfovibrionaceae|g__Desulfovibrio|s__vulgaris	PPI:Yes	Decreased	-4.84e-05	345	1	0.229083	0.964103
k__Bacteria|p__Bacteroidetes|c__Flavobacteriia|o__Flavobacteriales	PPI:Yes	Increased	5.21e-05	345	2	0.234557	0.973186
k__Bacteria|p__Bacteroidetes|c__Flavobacteriia|o__Flavobacteriales|f__Weeksellaceae	PPI:Yes	Increased	5.21e-05	345	2	0.234557	0.973186
k__Bacteria|p__Firmicutes|c__Bacilli|o__Lactobacillales|f__Carnobacteriaceae|g__Granulicatella	PPI:Yes	Increased	0.00102628	345	200	0.234564	0.973186
k__Bacteria|p__Fusobacteria|c__Fusobacteriia|o__Fusobacteriales|f__Leptotrichiaceae	PPI:Yes	Increased	0.000215509	345	9	0.235499	0.973186
k__Bacteria|p__Actinobacteria|c__Coriobacteriia|o__Coriobacteriales|f__Coriobacteriaceae|g__Atopobium|s__vaginae	PPI:Yes	Decreased	-0.000268462	345	7	0.24653	0.989826
k__Bacteria|p__Proteobacteria|c__Gammaproteobacteria|o__Enterobacteriales|f__Enterobacteriaceae|g__Yersinia	PPI:Yes	Decreased	-0.00027014	345	6	0.246822	0.989826
k__Bacteria|p__Firmicutes|c__Bacilli|o__Bacillales|f__Staphylococcaceae|g__Jeotgalicoccus	PPI:Yes	Decreased	-4.1e-05	345	1	0.248877	0.993734
k__Bacteria|p__Firmicutes|c__Clostridia|o__Clostridiales|f__Lachnospiraceae|g__Dorea|s__longicatena	PPI:Yes	Increased	0.00408059	345	329	0.252866	0.997821
k__Bacteria|p__Actinobacteria|c__Actinobacteria|o__Actinomycetales|f__Actinomycetaceae|g__Mobiluncus	PPI:Yes	Decreased	-0.000298048	345	18	0.254673	1
k__Bacteria|p__Cyanobacteria|c__Chloroplast|o__Streptophyta	PPI:Yes	Increased	0.000697976	345	71	0.256959	1
k__Bacteria|p__Actinobacteria|c__Coriobacteriia|o__Coriobacteriales|f__Coriobacteriaceae|g__Eggerthella|s__lenta	PPI:Yes	Increased	0.00279354	345	231	0.264956	1
k__Bacteria|p__Proteobacteria|c__Gammaproteobacteria|o__Enterobacteriales|f__Enterobacteriaceae|g__Shigella|s__boydii	PPI:Yes	Decreased	-0.000435249	345	41	0.265252	1
k__Bacteria|p__Proteobacteria|c__Betaproteobacteria|o__Burkholderiales|f__Comamonadaceae	PPI:Yes	Increased	0.00085742	345	7	0.268249	1
k__Bacteria|p__Actinobacteria|c__Actinobacteria|o__Bifidobacteriales|f__Bifidobacteriaceae|g__Gardnerella	PPI:Yes	Decreased	-0.000353549	345	8	0.268927	1
k__Bacteria|p__Bacteroidetes|c__Bacteroidia|o__Bacteroidales|f__Bacteroidaceae|g__Bacteroides|s__fragilis	PPI:Yes	Increased	0.00346142	345	228	0.272171	1
k__Bacteria|p__Proteobacteria|c__Gammaproteobacteria|o__Pseudomonadales|f__Moraxellaceae|g__Acinetobacter|s__johnsonii	PPI:Yes	Increased	8.79e-05	345	3	0.274101	1
k__Bacteria|p__Proteobacteria|c__Gammaproteobacteria|o__Enterobacteriales|f__Enterobacteriaceae|g__Trabulsiella|s__farmeri	PPI:Yes	Decreased	-0.000145057	345	4	0.274656	1
k__Bacteria|p__Firmicutes|c__Clostridia|o__Clostridiales|f__Peptococcaceae|g__Peptococcus	PPI:Yes	Increased	0.00506421	345	63	0.275125	1
k__Bacteria|p__Fusobacteria|c__Fusobacteriia|o__Fusobacteriales|f__Fusobacteriaceae	PPI:Yes	Decreased	-0.000971708	345	47	0.278517	1
k__Bacteria|p__Fusobacteria|c__Fusobacteriia|o__Fusobacteriales|f__Fusobacteriaceae|g__Fusobacterium	PPI:Yes	Decreased	-0.000971708	345	47	0.278517	1
k__Bacteria|p__Firmicutes|c__Erysipelotrichi|o__Erysipelotrichales|f__Erysipelotrichaceae|g__Bulleidia|s__p-1630-c5	PPI:Yes	Increased	0.0055305	345	52	0.283869	1
k__Bacteria|p__Bacteroidetes|c__Bacteroidia|o__Bacteroidales|f__Rikenellaceae|g__Alistipes|s__finegoldii	PPI:Yes	Decreased	-0.000614906	345	95	0.285739	1
k__Bacteria|p__Firmicutes|c__Clostridia|o__Clostridiales|f__Ruminococcaceae|g__Anaerotruncus	PPI:Yes	Decreased	-0.000516644	345	116	0.288602	1
k__Bacteria|p__Firmicutes|c__Erysipelotrichi|o__Erysipelotrichales|f__Erysipelotrichaceae|g__Clostridium|s__spiroforme	PPI:Yes	Decreased	-0.000637425	345	116	0.293487	1
k__Bacteria|p__Proteobacteria|c__Alphaproteobacteria|o__Rickettsiales|f__mitochondria|g__Nicotiana|s__tabacum	PPI:Yes	Increased	8.36e-05	345	4	0.294705	1
k__Bacteria|p__Firmicutes|c__Clostridia|o__Clostridiales|f__Ruminococcaceae|[g__Ruminococcus/g__Oscillospira]	PPI:Yes	Decreased	-0.00571394	345	49	0.294712	1
k__Bacteria|p__Actinobacteria|c__Thermoleophilia|o__Solirubrobacterales	PPI:Yes	Decreased	-4.63e-05	345	1	0.294801	1
k__Bacteria|p__Actinobacteria|c__Thermoleophilia|o__Solirubrobacterales|f__Conexibacteraceae	PPI:Yes	Decreased	-4.63e-05	345	1	0.294801	1
k__Bacteria|p__Actinobacteria|c__Actinobacteria|o__Actinomycetales|f__Actinomycetaceae|g__Actinobaculum	PPI:Yes	Decreased	-0.000104528	345	3	0.295652	1
k__Bacteria|p__Proteobacteria|c__Gammaproteobacteria|o__Enterobacteriales|f__Enterobacteriaceae|g__Enterobacter|s__amnigenus	PPI:Yes	Decreased	-0.000129407	345	3	0.298203	1
k__Bacteria|p__Synergistetes|c__Synergistia|o__Synergistales	PPI:Yes	Increased	0.00103617	345	35	0.304403	1
k__Bacteria|p__Firmicutes|c__Clostridia|o__Clostridiales|f__Mogibacteriaceae	PPI:Yes	Decreased	-0.00271539	345	337	0.305731	1
k__Bacteria|p__Actinobacteria|c__Actinobacteria|o__Actinomycetales|f__Micrococcaceae|g__Rothia|s__aeria	PPI:Yes	Decreased	-0.00020198	345	19	0.307719	1
k__Bacteria|p__Proteobacteria|c__Gammaproteobacteria|o__Enterobacteriales|f__Enterobacteriaceae|g__Serratia	PPI:Yes	Decreased	-0.000602611	345	21	0.310052	1
k__Bacteria|p__Proteobacteria|c__Gammaproteobacteria|o__Enterobacteriales|f__Enterobacteriaceae|g__Salmonella	PPI:Yes	Decreased	-0.000155037	345	5	0.310757	1
k__Bacteria|p__Proteobacteria|c__Gammaproteobacteria|o__Enterobacteriales|f__Enterobacteriaceae|g__Salmonella|s__enterica	PPI:Yes	Decreased	-0.000155037	345	5	0.310757	1
k__Bacteria|p__Bacteroidetes|c__Bacteroidia|o__Bacteroidales|f__Bacteroidaceae|g__Bacteroides|[s__ovatus/s__fragilis]	PPI:Yes	Increased	0.000193544	345	14	0.311584	1
k__Bacteria|p__Firmicutes|c__Clostridia|o__Clostridiales|f__Veillonellaceae|g__Megasphaera	PPI:Yes	Increased	0.000354456	345	98	0.313276	1
k__Bacteria|p__Firmicutes|c__Erysipelotrichi|o__Erysipelotrichales|f__Erysipelotrichaceae|g__Holdemania	PPI:Yes	Decreased	-0.0011589	345	267	0.314467	1
k__Bacteria|p__Bacteroidetes|c__Bacteroidia|o__Bacteroidales|f__Rikenellaceae|g__Rikenella	PPI:Yes	Increased	0.000389111	345	3	0.316733	1
k__Bacteria|p__Proteobacteria|c__Gammaproteobacteria|o__Pasteurellales|f__Pasteurellaceae|[g__Haemophilus/g__Aggregatibacter]	PPI:Yes	Decreased	-0.000187806	345	13	0.317658	1
k__Bacteria|p__Proteobacteria|c__Gammaproteobacteria|o__Enterobacteriales|f__Enterobacteriaceae|g__Kluyvera|s__intermedia	PPI:Yes	Decreased	-0.000236354	345	9	0.318163	1
k__Bacteria|p__Proteobacteria|c__Gammaproteobacteria|o__Enterobacteriales|f__Enterobacteriaceae|g__Shigella|s__sonnei	PPI:Yes	Decreased	-8.41e-05	345	5	0.318847	1
k__Bacteria|p__Firmicutes|c__Bacilli|o__Lactobacillales|f__Carnobacteriaceae|g__Carnobacterium|s__viridans	PPI:Yes	Decreased	-9.35e-05	345	5	0.320436	1
k__Bacteria|p__Bacteroidetes|c__Bacteroidia|o__Bacteroidales|f__Bacteroidaceae|g__Bacteroides|s__caccae	PPI:Yes	Decreased	-0.00455239	345	264	0.321563	1
k__Bacteria|p__Firmicutes|c__Clostridia|o__Clostridiales|f__Lachnospiraceae|g__Hespellia|s__porcina	PPI:Yes	Decreased	-8.39e-05	345	6	0.323788	1
k__Bacteria|p__Firmicutes|c__Clostridia|o__Clostridiales|f__Lachnospiraceae|g__Clostridium|s__symbiosum	PPI:Yes	Decreased	-0.000248447	345	22	0.323942	1
k__Bacteria|p__Proteobacteria|c__Gammaproteobacteria|o__Pseudomonadales|f__Moraxellaceae|g__Acinetobacter|s__guillouiae	PPI:Yes	Decreased	-4.31e-05	345	1	0.328488	1
k__Bacteria|p__Synergistetes|c__Synergistia|o__Synergistales|f__Synergistaceae	PPI:Yes	Increased	0.000981149	345	33	0.330253	1
k__Bacteria|p__Firmicutes|c__Clostridia|o__Clostridiales|f__Tissierellaceae|g__Peptoniphilus	PPI:Yes	Increased	0.000468354	345	99	0.332126	1
k__Bacteria|p__Proteobacteria|c__Gammaproteobacteria|o__Pseudomonadales|f__Moraxellaceae	PPI:Yes	Increased	0.000140438	345	6	0.337409	1
k__Bacteria|p__Proteobacteria|c__Gammaproteobacteria|o__Pseudomonadales|f__Moraxellaceae|g__Acinetobacter	PPI:Yes	Increased	0.000140438	345	6	0.337409	1
k__Bacteria|p__Actinobacteria|c__Actinobacteria|o__Actinomycetales|f__Micrococcaceae|g__Arthrobacter|s__oxydans	PPI:Yes	Decreased	-6.68e-05	345	3	0.337904	1
k__Bacteria|p__Firmicutes	PPI:Yes	Increased	0.0202753	345	345	0.340268	1
k__Bacteria|p__Firmicutes|c__Bacilli|o__Bacillales	PPI:Yes	Increased	0.000730938	345	177	0.340411	1
k__Bacteria|p__Firmicutes|c__Bacilli|o__Lactobacillales|f__Lactobacillaceae|g__Lactobacillus|s__ruminis	PPI:Yes	Increased	0.00501809	345	57	0.342558	1
k__Bacteria|p__Firmicutes|c__Bacilli|[o__Bacillales/o__Lactobacillales]	PPI:Yes	Decreased	-3.6e-05	345	1	0.344914	1
k__Bacteria|p__Firmicutes|c__Clostridia|o__Clostridiales|f__Lachnospiraceae	PPI:Yes	Decreased	-0.0194475	345	345	0.345858	1
k__Bacteria|p__Firmicutes|c__Clostridia|o__Clostridiales|f__Lachnospiraceae|g__Roseburia|s__faecis	PPI:Yes	Increased	0.00393477	345	325	0.347136	1
k__Bacteria|p__Firmicutes|c__Clostridia|o__Clostridiales|f__Ruminococcaceae|g__Faecalibacterium	PPI:Yes	Increased	0.0143362	345	341	0.349682	1
k__Bacteria|p__Actinobacteria|c__Actinobacteria|o__Actinomycetales|f__Actinomycetaceae|g__Actinomyces|s__europaeus	PPI:Yes	Decreased	-8.74e-05	345	2	0.350706	1
k__Bacteria|p__Firmicutes|c__Clostridia|o__Clostridiales|f__Ruminococcaceae|g__Faecalibacterium|s__prausnitzii	PPI:Yes	Increased	0.0142981	345	341	0.35074	1
k__Bacteria|p__Actinobacteria|c__Thermoleophilia	PPI:Yes	Decreased	-5.48e-05	345	2	0.35258	1
k__Bacteria|p__Actinobacteria|c__Actinobacteria|o__Actinomycetales|f__Corynebacteriaceae|g__Corynebacterium	PPI:Yes	Increased	0.00066208	345	187	0.352654	1
k__Bacteria|p__Firmicutes|c__Erysipelotrichi|o__Erysipelotrichales|f__Erysipelotrichaceae|g__Sharpea	PPI:Yes	Decreased	-8.42e-05	345	3	0.355245	1
k__Bacteria|p__Fusobacteria|c__Fusobacteriia|o__Fusobacteriales	PPI:Yes	Decreased	-0.000842241	345	52	0.355295	1
k__Bacteria|p__Firmicutes|c__Bacilli|o__Gemellales|f__Gemellaceae|g__Gemella	PPI:Yes	Increased	0.000491352	345	138	0.357299	1
k__Bacteria|p__Firmicutes|c__Clostridia|o__Clostridiales|f__Peptococcaceae|g__Desulfosporosinus|s__meridiei	PPI:Yes	Decreased	-3.41e-05	345	1	0.358153	1
k__Bacteria|p__Firmicutes|c__Bacilli|o__Lactobacillales|f__Lactobacillaceae|g__Pediococcus|s__parvulus	PPI:Yes	Decreased	-8.23e-05	345	3	0.359641	1
k__Bacteria|p__Proteobacteria|c__Gammaproteobacteria|o__Pasteurellales|f__Pasteurellaceae|g__Aggregatibacter	PPI:Yes	Decreased	-0.000206478	345	9	0.360069	1
k__Bacteria|p__Firmicutes|c__Bacilli|o__Bacillales|f__Staphylococcaceae|g__Staphylococcus	PPI:Yes	Increased	0.000328378	345	77	0.36311	1
k__Bacteria|p__Bacteroidetes|c__Bacteroidia|o__Bacteroidales|[f__[Barnesiellaceae]/f__S24-7]	PPI:Yes	Decreased	-0.00157042	345	70	0.365036	1
k__Bacteria|p__Firmicutes|c__Clostridia|o__Clostridiales|f__Clostridiaceae|g__Clostridium|s__baratii	PPI:Yes	Decreased	-3.59e-05	345	1	0.36657	1
k__Bacteria|p__Proteobacteria|c__Gammaproteobacteria|o__Enterobacteriales|f__Enterobacteriaceae|g__Erwinia|s__oleae	PPI:Yes	Decreased	-3.69e-05	345	1	0.366658	1
k__Bacteria|p__Firmicutes|c__Bacilli|o__Bacillales|[f__Planococcaceae/f__Bacillaceae]	PPI:Yes	Decreased	-3.42e-05	345	1	0.371957	1
k__Bacteria|p__Proteobacteria|c__Gammaproteobacteria|o__Enterobacteriales|f__Enterobacteriaceae|g__Citrobacter	PPI:Yes	Decreased	-0.00102196	345	40	0.372371	1
k__Bacteria|p__Proteobacteria|c__Gammaproteobacteria|o__Enterobacteriales|f__Enterobacteriaceae|g__Kluyvera	PPI:Yes	Decreased	-0.000235209	345	13	0.373068	1
k__Bacteria|p__Firmicutes|c__Bacilli|o__Lactobacillales|f__Streptococcaceae|g__Lactococcus	PPI:Yes	Decreased	-0.00143792	345	202	0.373269	1
k__Bacteria|p__Firmicutes|c__Clostridia|o__Clostridiales|f__Peptostreptococcaceae|g__Clostridium	PPI:Yes	Increased	0.00720213	345	324	0.373595	1
k__Bacteria|p__Actinobacteria|c__Actinobacteria|o__Actinomycetales|f__Actinomycetaceae|g__Trueperella	PPI:Yes	Decreased	-6.24e-05	345	1	0.374093	1
k__Bacteria|p__Proteobacteria|c__Gammaproteobacteria|o__Enterobacteriales|f__Enterobacteriaceae|g__Citrobacter|s__freundii	PPI:Yes	Decreased	-0.000519085	345	23	0.377806	1
k__Bacteria|p__Tenericutes|c__RF3|o__ML615J-28	PPI:Yes	Decreased	-0.000798478	345	65	0.377837	1
k__Bacteria|p__Firmicutes|c__Clostridia|o__Clostridiales|f__Lachnospiraceae|g__Dorea|s__formicigenerans	PPI:Yes	Decreased	-0.00351314	345	331	0.380255	1
k__Bacteria|p__Firmicutes|c__Clostridia|o__Clostridiales|f__Peptostreptococcaceae|g__Clostridium|s__bartlettii	PPI:Yes	Increased	0.00705115	345	324	0.382873	1
k__Bacteria|p__Firmicutes|c__Bacilli|o__Lactobacillales|f__Leuconostocaceae|g__Weissella|s__viridescens	PPI:Yes	Decreased	-0.000132945	345	7	0.383382	1
k__Bacteria|p__Actinobacteria|c__Coriobacteriia|o__Coriobacteriales|f__Coriobacteriaceae|g__Adlercreutzia	PPI:Yes	Decreased	-0.00207349	345	273	0.389995	1
k__Bacteria|p__Proteobacteria|c__Gammaproteobacteria|o__Enterobacteriales|f__Enterobacteriaceae|[g__Klebsiella/g__Pantoea/g__Kluyvera]	PPI:Yes	Increased	0.000113713	345	2	0.390059	1
k__Bacteria|p__Actinobacteria	PPI:Yes	Decreased	-0.0184571	345	345	0.391579	1
k__Bacteria|p__Actinobacteria|c__Actinobacteria|o__Actinomycetales|f__Micrococcaceae|g__Kocuria	PPI:Yes	Decreased	-6.01e-05	345	5	0.3923	1
k__Bacteria|p__Proteobacteria|c__Gammaproteobacteria|o__Enterobacteriales|f__Enterobacteriaceae|[g__Raoultella/g__Citrobacter]	PPI:Yes	Decreased	-5.45e-05	345	2	0.393497	1
k__Bacteria|p__Bacteroidetes|c__Sphingobacteriia|o__Sphingobacteriales	PPI:Yes	Decreased	-4.35e-05	345	1	0.393952	1
k__Bacteria|p__Bacteroidetes|c__Sphingobacteriia|o__Sphingobacteriales|f__Sphingobacteriaceae	PPI:Yes	Decreased	-4.35e-05	345	1	0.393952	1
k__Bacteria|p__Bacteroidetes|c__Sphingobacteriia|o__Sphingobacteriales|f__Sphingobacteriaceae|g__Sphingobacterium	PPI:Yes	Decreased	-4.35e-05	345	1	0.393952	1
k__Bacteria|p__Bacteroidetes|c__Sphingobacteriia|o__Sphingobacteriales|f__Sphingobacteriaceae|g__Sphingobacterium|s__multivorum	PPI:Yes	Decreased	-4.35e-05	345	1	0.393952	1
k__Bacteria|p__Firmicutes|c__Bacilli|o__Lactobacillales|f__Lactobacillaceae|g__Lactobacillus|s__iners	PPI:Yes	Decreased	-0.00011977	345	6	0.397304	1
k__Bacteria|p__Firmicutes|c__Clostridia|o__Clostridiales|[f__Ruminococcaceae/f__Lachnospiraceae]	PPI:Yes	Decreased	-0.0026672	345	345	0.398285	1
k__Bacteria|p__Proteobacteria|c__Betaproteobacteria|o__Neisseriales|f__Neisseriaceae	PPI:Yes	Increased	0.000183278	345	15	0.401432	1
k__Bacteria|p__Proteobacteria|c__Alphaproteobacteria|o__RF32	PPI:Yes	Decreased	-0.000910372	345	133	0.401997	1
k__Bacteria|p__Firmicutes|c__Clostridia|o__Clostridiales|f__Clostridiaceae|g__Clostridium	PPI:Yes	Increased	0.00372936	345	343	0.40552	1
k__Bacteria|p__Actinobacteria|c__Actinobacteria|o__Bifidobacteriales|f__Bifidobacteriaceae|g__Bifidobacterium|[s__longum/s__breve]	PPI:Yes	Decreased	-0.00304006	345	310	0.40773	1
k__Bacteria|p__Firmicutes|c__Clostridia|o__Clostridiales|f__Clostridiaceae|g__SMB53	PPI:Yes	Increased	0.0024211	345	327	0.407815	1
k__Bacteria|p__Firmicutes|c__Clostridia|o__Clostridiales|f__Veillonellaceae|g__Mitsuokella|s__multacida	PPI:Yes	Decreased	-0.000124135	345	5	0.409011	1
k__Bacteria|p__Firmicutes|c__Clostridia|o__Clostridiales|f__Lachnospiraceae|g__Dorea	PPI:Yes	Decreased	-0.00420253	345	345	0.409266	1
k__Bacteria|p__Firmicutes|c__Clostridia|o__Clostridiales|f__Ruminococcaceae|g__Ruminococcus|s__bromii	PPI:Yes	Increased	0.0176222	345	318	0.409533	1
k__Bacteria|p__Synergistetes|c__Synergistia|o__Synergistales|f__Dethiosulfovibrionaceae	PPI:Yes	Increased	5.5e-05	345	2	0.412628	1
k__Bacteria|p__Synergistetes|c__Synergistia|o__Synergistales|f__Dethiosulfovibrionaceae|g__Pyramidobacter	PPI:Yes	Increased	5.5e-05	345	2	0.412628	1
k__Bacteria|p__Proteobacteria|c__Gammaproteobacteria|o__Enterobacteriales|f__Enterobacteriaceae|[g__Shigella/g__Citrobacter]	PPI:Yes	Decreased	-7.21e-05	345	4	0.415915	1
k__Archaea|p__Euryarchaeota|c__Methanobacteria|o__Methanobacteriales|f__Methanobacteriaceae|g__Methanobrevibacter	PPI:Yes	Decreased	-0.0101917	345	204	0.415967	1
k__Bacteria|p__Bacteroidetes|c__Bacteroidia|o__Bacteroidales|f__Odoribacteraceae|g__Butyricimonas	PPI:Yes	Decreased	-0.00109207	345	189	0.416069	1
k__Bacteria|p__Actinobacteria|c__Actinobacteria|o__Bifidobacteriales|f__Bifidobacteriaceae|g__Bifidobacterium|s__pseudolongum	PPI:Yes	Increased	0.000333104	345	95	0.4179	1
k__Bacteria|p__Firmicutes|c__Bacilli|[o__Gemellales/o__Bacillales/o__Lactobacillales]	PPI:Yes	Decreased	-5.29e-05	345	1	0.418608	1
k__Bacteria|p__Actinobacteria|c__Actinobacteria|o__Actinomycetales|f__Nocardiaceae|g__Rhodococcus|s__ruber	PPI:Yes	Decreased	-7.79e-05	345	9	0.420045	1
k__Bacteria|p__Proteobacteria|c__Gammaproteobacteria|o__Enterobacteriales|f__Enterobacteriaceae|g__Buttiauxella|s__agrestis	PPI:Yes	Increased	0.000304359	345	12	0.420669	1
k__Bacteria|p__Firmicutes|c__Clostridia|o__Clostridiales|f__Veillonellaceae|g__Phascolarctobacterium	PPI:Yes	Increased	0.00444812	345	199	0.421065	1
k__Bacteria|p__Firmicutes|c__Clostridia|o__Clostridiales|f__Mogibacteriaceae|g__Mogibacterium	PPI:Yes	Increased	0.000607184	345	195	0.421729	1
k__Bacteria|p__Firmicutes|c__Erysipelotrichi|o__Erysipelotrichales|f__Erysipelotrichaceae|g__Bulleidia|s__moorei	PPI:Yes	Decreased	-0.000512241	345	157	0.424906	1
k__Bacteria|p__Firmicutes|c__Bacilli|o__Lactobacillales|f__Leuconostocaceae|g__Leuconostoc|s__fallax	PPI:Yes	Decreased	-0.000109311	345	2	0.425484	1
k__Bacteria|p__Firmicutes|c__Clostridia|o__Clostridiales|f__Tissierellaceae|g__Parvimonas	PPI:Yes	Decreased	-0.00041268	345	117	0.425994	1
k__Bacteria|p__Firmicutes|c__Bacilli|o__Bacillales|f__Staphylococcaceae	PPI:Yes	Increased	0.000286305	345	78	0.428413	1
k__Bacteria|p__Actinobacteria|c__Actinobacteria|o__Actinomycetales|f__Actinomycetaceae|g__Varibaculum	PPI:Yes	Increased	0.000647713	345	64	0.428897	1
k__Bacteria|p__Proteobacteria|c__Betaproteobacteria|o__Burkholderiales|f__Burkholderiaceae	PPI:Yes	Increased	7.46e-05	345	7	0.429357	1
k__Bacteria|p__Proteobacteria|c__Betaproteobacteria|o__Burkholderiales|f__Burkholderiaceae|g__Lautropia	PPI:Yes	Increased	7.46e-05	345	7	0.429357	1
k__Bacteria|p__Firmicutes|c__Bacilli|o__Lactobacillales|f__Leuconostocaceae|g__Weissella|s__hellenica	PPI:Yes	Increased	0.000152473	345	16	0.430066	1
k__Bacteria|p__Proteobacteria|c__Epsilonproteobacteria|o__Campylobacterales|f__Helicobacteraceae	PPI:Yes	Decreased	-8.58e-05	345	1	0.432173	1
k__Bacteria|p__Proteobacteria|c__Epsilonproteobacteria|o__Campylobacterales|f__Helicobacteraceae|g__Helicobacter	PPI:Yes	Decreased	-8.58e-05	345	1	0.432173	1
k__Bacteria|p__Firmicutes|c__Clostridia|o__Clostridiales|[f__Ruminococcaceae/f__Clostridiaceae]	PPI:Yes	Decreased	-0.0016225	345	292	0.433838	1
k__Bacteria|p__Proteobacteria|c__Gammaproteobacteria|o__Enterobacteriales|f__Enterobacteriaceae|[g__Klebsiella/g__Pantoea]	PPI:Yes	Decreased	-0.000128079	345	3	0.437198	1
k__Bacteria|p__Actinobacteria|c__Actinobacteria|o__Bifidobacteriales|f__Bifidobacteriaceae|g__Bifidobacterium|s__breve	PPI:Yes	Decreased	-0.00418637	345	317	0.437577	1
k__Bacteria|p__Bacteroidetes|c__Bacteroidia|o__Bacteroidales|f__Paraprevotellaceae|g__Prevotella	PPI:Yes	Increased	0.00420986	345	57	0.43776	1
k__Bacteria|p__Synergistetes|c__Synergistia|o__Synergistales|f__Synergistaceae|g__Cloacibacillus	PPI:Yes	Increased	0.000655697	345	18	0.442876	1
k__Bacteria|p__Proteobacteria|c__Gammaproteobacteria|o__Enterobacteriales|f__Enterobacteriaceae|[g__Enterobacter/g__Kluyvera]	PPI:Yes	Decreased	-7.64e-05	345	4	0.44309	1
k__Bacteria|p__Firmicutes|c__Bacilli|o__Bacillales|f__Staphylococcaceae|g__Staphylococcus|s__haemolyticus	PPI:Yes	Decreased	-5.45e-05	345	3	0.443668	1
k__Bacteria|p__Proteobacteria|c__Gammaproteobacteria|o__Enterobacteriales|f__Enterobacteriaceae|g__Rahnella|s__aquatilis	PPI:Yes	Decreased	-3.41e-05	345	1	0.444667	1
k__Bacteria|p__Proteobacteria|c__Gammaproteobacteria|o__Enterobacteriales|f__Enterobacteriaceae|g__Serratia|s__fonticola	PPI:Yes	Decreased	-5.91e-05	345	1	0.444667	1
k__Bacteria|p__Firmicutes|c__Clostridia|o__Clostridiales|f__Peptostreptococcaceae|g__Peptostreptococcus|s__anaerobius	PPI:Yes	Increased	0.000178843	345	23	0.445792	1
k__Bacteria|p__Firmicutes|c__Clostridia|o__Clostridiales|f__Lachnospiraceae|g__Shuttleworthia|s__satelles	PPI:Yes	Increased	8.45e-05	345	2	0.448502	1
k__Bacteria|p__Proteobacteria|c__Gammaproteobacteria|o__Enterobacteriales|f__Enterobacteriaceae|[g__Escherichia/g__Citrobacter]	PPI:Yes	Decreased	-0.000170829	345	3	0.451671	1
k__Bacteria|p__Proteobacteria|c__Gammaproteobacteria|o__Pseudomonadales|f__Pseudomonadaceae	PPI:Yes	Decreased	-0.000151921	345	22	0.453655	1
k__Bacteria|p__Proteobacteria|c__Gammaproteobacteria|o__Pseudomonadales|f__Pseudomonadaceae|g__Pseudomonas	PPI:Yes	Decreased	-0.000151921	345	22	0.453655	1
k__Bacteria|p__Proteobacteria|c__Gammaproteobacteria|o__Enterobacteriales|f__Enterobacteriaceae|[g__Enterobacter/g__Pantoea]	PPI:Yes	Decreased	-0.000215155	345	6	0.454226	1
k__Bacteria|p__Proteobacteria|c__Gammaproteobacteria|o__Enterobacteriales|f__Enterobacteriaceae|g__Shigella	PPI:Yes	Decreased	-0.000391645	345	53	0.458018	1
k__Bacteria|p__Proteobacteria|c__Gammaproteobacteria|o__Enterobacteriales|f__Enterobacteriaceae|g__Enterobacter|[s__cancerogenus/s__cloacae/s__ludwigii/s__amnigenus]	PPI:Yes	Decreased	-9.31e-05	345	3	0.460497	1
k__Bacteria|p__Cyanobacteria|c__4C0d-2	PPI:Yes	Decreased	-0.000644209	345	109	0.463531	1
k__Bacteria|p__Cyanobacteria|c__4C0d-2|o__YS2	PPI:Yes	Decreased	-0.000644209	345	109	0.463531	1
k__Bacteria|p__Tenericutes|c__Mollicutes|o__Anaeroplasmatales|f__Anaeroplasmataceae	PPI:Yes	Decreased	-0.00102415	345	25	0.464034	1
k__Bacteria|p__Firmicutes|c__Bacilli|o__Bacillales|f__Staphylococcaceae|g__Staphylococcus|s__aureus	PPI:Yes	Increased	7.4e-05	345	7	0.464659	1
k__Bacteria|p__Bacteroidetes|c__Bacteroidia|o__Bacteroidales|f__Rikenellaceae|g__Alistipes|s__massiliensis	PPI:Yes	Decreased	-0.00106563	345	87	0.465086	1
k__Bacteria|p__Firmicutes|c__Erysipelotrichi|o__Erysipelotrichales|f__Erysipelotrichaceae|g__Allobaculum	PPI:Yes	Decreased	-0.00213264	345	53	0.466282	1
k__Bacteria|p__Proteobacteria|c__Gammaproteobacteria|o__Pasteurellales|f__Pasteurellaceae|g__Haemophilus|s__influenzae	PPI:Yes	Decreased	-3.13e-05	345	1	0.466393	1
k__Bacteria|p__Bacteroidetes|c__Bacteroidia|o__Bacteroidales|f__Bacteroidaceae|g__Bacteroides|s__eggerthii	PPI:Yes	Decreased	-0.000262115	345	118	0.466861	1
k__Bacteria|p__Firmicutes|c__Bacilli|o__Bacillales|f__Planococcaceae|g__Bacillus	PPI:Yes	Decreased	-6.94e-05	345	3	0.467887	1
k__Bacteria|p__Firmicutes|c__Bacilli|o__Bacillales|f__Planococcaceae|g__Bacillus|s__massiliensis	PPI:Yes	Decreased	-6.94e-05	345	3	0.467887	1
k__Bacteria|p__Firmicutes|c__OPB54	PPI:Yes	Decreased	-4.32e-05	345	2	0.47833	1
k__Bacteria|p__Firmicutes|c__Clostridia|o__Clostridiales|f__Ruminococcaceae|g__Ruminococcus|s__flavefaciens	PPI:Yes	Decreased	-0.000340707	345	106	0.479647	1
k__Bacteria|p__Proteobacteria|c__Alphaproteobacteria	PPI:Yes	Decreased	-0.000850323	345	163	0.479743	1
k__Bacteria|p__Actinobacteria|c__Actinobacteria|o__Bifidobacteriales|f__Bifidobacteriaceae|g__Bifidobacterium|s__longum	PPI:Yes	Decreased	-0.00618542	345	327	0.4821	1
k__Bacteria|p__Proteobacteria|c__Betaproteobacteria|o__Burkholderiales|f__Comamonadaceae|[g__Comamonas/g__Diaphorobacter]	PPI:Yes	Increased	0.000161484	345	4	0.482339	1
k__Bacteria|p__Actinobacteria|c__Actinobacteria|o__Bifidobacteriales|f__Bifidobacteriaceae|g__Bifidobacterium	PPI:Yes	Decreased	-0.0155954	345	343	0.48521	1
k__Bacteria|p__Proteobacteria|c__Gammaproteobacteria|o__Pasteurellales|f__Pasteurellaceae|g__Aggregatibacter|s__segnis	PPI:Yes	Decreased	-3.82e-05	345	2	0.489719	1
k__Bacteria|p__Firmicutes|c__Bacilli|o__Lactobacillales|[f__Lactobacillaceae/f__Streptococcaceae]	PPI:Yes	Decreased	-6.45e-05	345	3	0.490716	1
k__Bacteria|p__Firmicutes|c__Clostridia|o__Clostridiales|f__Clostridiaceae	PPI:Yes	Increased	0.00647124	345	345	0.494255	1
k__Bacteria|p__Firmicutes|c__Bacilli|[o__Gemellales/o__Lactobacillales]	PPI:Yes	Increased	5.52e-05	345	3	0.495636	1
k__Bacteria|p__Firmicutes|c__Bacilli|o__Lactobacillales|f__Leuconostocaceae|g__Fructobacillus	PPI:Yes	Decreased	-6.22e-05	345	3	0.496207	1
k__Bacteria|p__Proteobacteria|c__Betaproteobacteria|o__Burkholderiales|f__Oxalobacteraceae	PPI:Yes	Increased	0.000792471	345	137	0.499976	1
k__Bacteria|p__Actinobacteria|c__Actinobacteria|o__Bifidobacteriales|f__Bifidobacteriaceae	PPI:Yes	Decreased	-0.0150131	345	344	0.500037	1
k__Bacteria|p__Proteobacteria|c__Gammaproteobacteria|o__Enterobacteriales|f__Enterobacteriaceae|g__Citrobacter|s__gillenii	PPI:Yes	Decreased	-3.06e-05	345	2	0.500149	1
k__Bacteria|p__Proteobacteria|c__Gammaproteobacteria|o__Pasteurellales|f__Pasteurellaceae|g__Actinobacillus|s__parahaemolyticus	PPI:Yes	Increased	0.000193972	345	23	0.50102	1
k__Bacteria|p__Firmicutes|c__Clostridia|o__Clostridiales|f__Ruminococcaceae|g__Ruminococcus|s__albus	PPI:Yes	Decreased	-8.56e-05	345	3	0.501136	1
k__Bacteria|p__Firmicutes|c__Clostridia|o__Clostridiales|f__Lachnospiraceae|g__Roseburia	PPI:Yes	Increased	0.00444295	345	342	0.512007	1
k__Bacteria|p__Proteobacteria|c__Gammaproteobacteria|o__Enterobacteriales|f__Enterobacteriaceae|g__Raoultella|s__terrigena	PPI:Yes	Decreased	-0.000142061	345	2	0.512401	1
k__Bacteria|p__Firmicutes|c__Erysipelotrichi|o__Erysipelotrichales|f__Erysipelotrichaceae|g__Eubacterium|s__biforme	PPI:Yes	Increased	0.01104	345	219	0.514097	1
k__Bacteria|p__Firmicutes|c__Clostridia|o__Clostridiales|f__Peptostreptococcaceae|g__Clostridium|s__bifermentans	PPI:Yes	Increased	0.000271735	345	2	0.515874	1
k__Bacteria|p__Firmicutes|c__Clostridia|o__Clostridiales|f__Tissierellaceae|g__Gallicola	PPI:Yes	Decreased	-7.95e-05	345	7	0.523585	1
k__Bacteria|p__Firmicutes|c__Erysipelotrichi|o__Erysipelotrichales|f__Erysipelotrichaceae|g__cc_115	PPI:Yes	Decreased	-0.00138166	345	250	0.525087	1
k__Bacteria|p__Firmicutes|c__Erysipelotrichi|o__Erysipelotrichales|f__Erysipelotrichaceae|g__Eubacterium|s__dolichum	PPI:Yes	Decreased	-0.00126658	345	257	0.525818	1
k__Bacteria|p__Firmicutes|c__Clostridia|o__Clostridiales|f__Lachnospiraceae|g__Shuttleworthia	PPI:Yes	Increased	8.85e-05	345	4	0.526561	1
k__Bacteria|p__Proteobacteria|c__Deltaproteobacteria|o__Desulfovibrionales|f__Desulfovibrionaceae|g__Desulfovibrio	PPI:Yes	Decreased	-0.00233858	345	152	0.529515	1
k__Bacteria|p__Firmicutes|c__Clostridia|o__Clostridiales|f__Lachnospiraceae|g__Clostridium|s__aldenense	PPI:Yes	Increased	6.13e-05	345	4	0.531503	1
k__Bacteria|p__Bacteroidetes|c__Bacteroidia|o__Bacteroidales|f__Bacteroidaceae|g__Bacteroides|s__barnesiae	PPI:Yes	Decreased	-0.000214195	345	2	0.533497	1
k__Bacteria|p__Proteobacteria|c__Betaproteobacteria|o__Burkholderiales|f__Oxalobacteraceae|g__Oxalobacter|s__formigenes	PPI:Yes	Increased	0.00070783	345	133	0.533928	1
k__Bacteria|p__Proteobacteria|c__Betaproteobacteria|o__Burkholderiales|f__Oxalobacteraceae|g__Oxalobacter	PPI:Yes	Increased	0.000707304	345	133	0.534465	1
k__Bacteria|p__Bacteroidetes|c__Bacteroidia|o__Bacteroidales|f__Porphyromonadaceae	PPI:Yes	Increased	0.00444435	345	329	0.536887	1
k__Bacteria|p__Bacteroidetes|c__Bacteroidia|o__Bacteroidales|f__Porphyromonadaceae|g__Parabacteroides	PPI:Yes	Increased	0.00443564	345	329	0.537887	1
k__Bacteria|p__Actinobacteria|c__Coriobacteriia|o__Coriobacteriales|f__Coriobacteriaceae|g__Collinsella|s__stercoris	PPI:Yes	Increased	0.00184411	345	42	0.539466	1
k__Bacteria|p__Proteobacteria|c__Deltaproteobacteria|o__Desulfovibrionales|f__Desulfovibrionaceae|g__Bilophila	PPI:Yes	Increased	0.00180269	345	261	0.540392	1
k__Bacteria|p__Firmicutes|c__Erysipelotrichi|o__Erysipelotrichales|f__Erysipelotrichaceae|g__Coprobacillus|s__cateniformis	PPI:Yes	Decreased	-2.8e-05	345	2	0.542791	1
k__Bacteria|p__Bacteroidetes|c__Bacteroidia|o__Bacteroidales|f__Prevotellaceae|g__Prevotella|s__copri	PPI:Yes	Decreased	-0.000272678	345	186	0.54333	1
k__Bacteria|p__Proteobacteria|c__Gammaproteobacteria|o__Pasteurellales|f__Pasteurellaceae|g__Actinobacillus	PPI:Yes	Increased	0.000184494	345	23	0.543818	1
k__Bacteria|p__Firmicutes|c__Bacilli|o__Bacillales|f__Listeriaceae|g__Brochothrix	PPI:Yes	Decreased	-4.43e-05	345	3	0.545236	1
k__Bacteria|p__Firmicutes|c__Clostridia|o__Clostridiales|f__Mogibacteriaceae|g__Anaerovorax	PPI:Yes	Decreased	-5.9e-05	345	3	0.546426	1
k__Bacteria|p__Firmicutes|c__Bacilli|o__Bacillales|f__Bacillaceae|g__Geobacillus|s__vulcani	PPI:Yes	Decreased	-0.000107028	345	3	0.548298	1
k__Bacteria|p__Proteobacteria|c__Gammaproteobacteria|o__Enterobacteriales|f__Enterobacteriaceae|g__Cronobacter	PPI:Yes	Decreased	-3.01e-05	345	2	0.54965	1
k__Bacteria|p__Proteobacteria|c__Gammaproteobacteria|o__Enterobacteriales|f__Enterobacteriaceae|g__Cronobacter|s__sakazakii	PPI:Yes	Decreased	-3.01e-05	345	2	0.54965	1
k__Bacteria|p__Proteobacteria|c__Gammaproteobacteria|o__Enterobacteriales|f__Enterobacteriaceae|[g__Klebsiella/g__Enterobacter]	PPI:Yes	Decreased	-0.000464205	345	21	0.551375	1
k__Bacteria|p__Proteobacteria|c__Gammaproteobacteria|o__Pasteurellales|f__Pasteurellaceae|[g__Haemophilus/g__Actinobacillus]	PPI:Yes	Increased	0.000108042	345	11	0.552355	1
k__Bacteria|p__Actinobacteria|c__Actinobacteria|o__Actinomycetales|f__Micrococcaceae|g__Arthrobacter|[s__sulfonivorans/s__oxydans]	PPI:Yes	Decreased	-4.84e-05	345	1	0.552504	1
k__Bacteria|p__Proteobacteria|c__Gammaproteobacteria|o__Enterobacteriales|f__Enterobacteriaceae|g__Enterobacter|[s__cloacae/s__amnigenus]	PPI:Yes	Decreased	-6.44e-05	345	2	0.553879	1
k__Bacteria|p__Firmicutes|c__Bacilli|o__Bacillales|f__Bacillaceae|g__Bacillus	PPI:Yes	Decreased	-0.000209507	345	51	0.55458	1
k__Bacteria|p__Firmicutes|c__Clostridia|o__Clostridiales|f__Peptostreptococcaceae|g__Peptostreptococcus	PPI:Yes	Increased	0.000258246	345	83	0.555876	1
k__Bacteria|p__Firmicutes|c__Clostridia|o__Clostridiales|f__Lachnospiraceae|[g__Dorea/g__Coprococcus]	PPI:Yes	Decreased	-0.000395643	345	197	0.557978	1
k__Bacteria|p__Firmicutes|c__Clostridia|o__Clostridiales|f__Lachnospiraceae|g__Lachnospira	PPI:Yes	Decreased	-0.00280395	345	327	0.55928	1
k__Archaea|p__Euryarchaeota|c__Methanobacteria|o__Methanobacteriales|f__Methanobacteriaceae	PPI:Yes	Decreased	-0.0075676	345	209	0.561563	1
k__Archaea	PPI:Yes	Decreased	-0.0075676	345	209	0.561575	1
k__Archaea|p__Euryarchaeota	PPI:Yes	Decreased	-0.0075676	345	209	0.561575	1
k__Bacteria|p__Firmicutes|c__Bacilli|o__Bacillales|f__Bacillaceae|g__Geobacillus	PPI:Yes	Decreased	-0.000115234	345	3	0.564717	1
k__Bacteria|p__Bacteroidetes|c__Bacteroidia|o__Bacteroidales|f__Paraprevotellaceae	PPI:Yes	Increased	0.00378663	345	173	0.570812	1
k__Bacteria	PPI:Yes	Increased	0.00737405	345	345	0.571516	1
k__Bacteria|p__Cyanobacteria	PPI:Yes	Decreased	-0.000551079	345	151	0.576926	1
k__Bacteria|p__Firmicutes|c__Clostridia|o__Clostridiales|f__Eubacteriaceae|g__Pseudoramibacter_Eubacterium	PPI:Yes	Increased	0.000590761	345	61	0.580323	1
k__Bacteria|p__Actinobacteria|c__Actinobacteria	PPI:Yes	Decreased	-0.0119965	345	345	0.581257	1
k__Bacteria|p__Proteobacteria|c__Alphaproteobacteria|o__Rhizobiales|f__Methylobacteriaceae|g__Methylobacterium	PPI:Yes	Increased	9.87e-05	345	12	0.586771	1
k__Bacteria|p__Proteobacteria|c__Gammaproteobacteria|o__Enterobacteriales|f__Enterobacteriaceae|g__Pantoea|s__agglomerans	PPI:Yes	Decreased	-6.17e-05	345	3	0.58684	1
k__Bacteria|p__Proteobacteria|c__Gammaproteobacteria|o__Pasteurellales|f__Pasteurellaceae|g__Pasteurella	PPI:Yes	Decreased	-3.25e-05	345	1	0.587936	1
k__Bacteria|p__Proteobacteria|c__Gammaproteobacteria|o__Pasteurellales|f__Pasteurellaceae|g__Pasteurella|s__bettyae	PPI:Yes	Decreased	-3.25e-05	345	1	0.587936	1
k__Bacteria|p__Firmicutes|c__Clostridia|o__Clostridiales|f__Clostridiaceae|g__Clostridium|s__botulinum	PPI:Yes	Increased	5.43e-05	345	9	0.588382	1
k__Bacteria|p__Firmicutes|c__Clostridia|o__Clostridiales|f__Peptococcaceae|g__rc4-4	PPI:Yes	Decreased	-0.000573525	345	65	0.590493	1
k__Bacteria|p__Firmicutes|c__Clostridia|o__Clostridiales|f__Clostridiaceae|g__Clostridium|s__paraputrificum	PPI:Yes	Decreased	-0.000534838	345	35	0.592067	1
k__Bacteria|p__Proteobacteria|c__Gammaproteobacteria|o__Enterobacteriales|f__Enterobacteriaceae|g__Klebsiella|s__oxytoca	PPI:Yes	Decreased	-0.000399501	345	14	0.592081	1
k__Bacteria|p__Firmicutes|c__Bacilli|o__Lactobacillales|f__Enterococcaceae|g__Melissococcus|s__plutonius	PPI:Yes	Decreased	-1.12e-05	345	1	0.592455	1
k__Bacteria|p__Firmicutes|c__Bacilli|o__Bacillales|f__Staphylococcaceae|g__Staphylococcus|s__equorum	PPI:Yes	Decreased	-9.38e-05	345	13	0.594305	1
k__Bacteria|p__Proteobacteria|c__Alphaproteobacteria|o__Rhizobiales|f__Rhizobiaceae	PPI:Yes	Decreased	-3.68e-05	345	3	0.598765	1
k__Bacteria|p__Verrucomicrobia|c__Opitutae	PPI:Yes	Decreased	-0.000199799	345	7	0.598777	1
k__Bacteria|p__Verrucomicrobia|c__Opitutae|o__Cerasicoccales|f__Cerasicoccaceae	PPI:Yes	Decreased	-0.000199799	345	7	0.598777	1
k__Bacteria|p__Firmicutes|c__Clostridia|o__Clostridiales|[f__Clostridiaceae/f__Peptostreptococcaceae]	PPI:Yes	Increased	0.000247222	345	86	0.611138	1
k__Bacteria|p__Proteobacteria|c__Epsilonproteobacteria|o__Campylobacterales|f__Campylobacteraceae	PPI:Yes	Increased	0.000156412	345	17	0.611826	1
k__Bacteria|p__Proteobacteria|c__Epsilonproteobacteria|o__Campylobacterales|f__Campylobacteraceae|g__Campylobacter	PPI:Yes	Increased	0.000156412	345	17	0.611826	1
k__Bacteria|p__Firmicutes|c__Bacilli|o__Lactobacillales|f__Streptococcaceae|g__Streptococcus|s__infantis	PPI:Yes	Increased	0.000167517	345	45	0.612426	1
k__Bacteria|p__Firmicutes|c__Clostridia|o__Clostridiales|f__Lachnospiraceae|g__Clostridium|s__bolteae	PPI:Yes	Decreased	-0.000359681	345	123	0.612478	1
k__Bacteria|p__Firmicutes|c__Bacilli|o__Lactobacillales|f__Enterococcaceae|g__Tetragenococcus	PPI:Yes	Decreased	-3.03e-05	345	2	0.614775	1
k__Bacteria|p__Firmicutes|c__Bacilli|o__Lactobacillales|f__Enterococcaceae|g__Tetragenococcus|s__halophilus	PPI:Yes	Decreased	-3.03e-05	345	2	0.614775	1
k__Bacteria|p__Proteobacteria|c__Betaproteobacteria|o__Burkholderiales|f__Comamonadaceae|g__Comamonas	PPI:Yes	Increased	0.000355199	345	6	0.616084	1
k__Bacteria|p__Firmicutes|c__Clostridia|o__Clostridiales|f__Lachnospiraceae|g__Robinsoniella|s__peoriensis	PPI:Yes	Increased	8.76e-05	345	9	0.616471	1
k__Bacteria|p__Proteobacteria|c__Gammaproteobacteria|o__Enterobacteriales|f__Enterobacteriaceae|g__Kluyvera|s__cryocrescens	PPI:Yes	Decreased	-5.88e-05	345	7	0.618996	1
k__Bacteria|p__Proteobacteria|c__Alphaproteobacteria|o__Rhizobiales	PPI:Yes	Increased	0.000103154	345	16	0.620623	1
k__Bacteria|p__Actinobacteria|c__Actinobacteria|o__Actinomycetales|f__Dietziaceae|g__Dietzia	PPI:Yes	Decreased	-2.16e-05	345	1	0.624087	1
k__Bacteria|p__Actinobacteria|c__Actinobacteria|o__Bifidobacteriales|f__Bifidobacteriaceae|g__Bifidobacterium|s__adolescentis	PPI:Yes	Decreased	-0.00634189	345	328	0.624257	1
k__Bacteria|p__Proteobacteria|c__Gammaproteobacteria|o__Enterobacteriales|f__Enterobacteriaceae|g__Pantoea	PPI:Yes	Decreased	-5.69e-05	345	4	0.626756	1
k__Bacteria|p__Lentisphaerae|c__Lentisphaeria|o__Victivallales|f__Victivallaceae	PPI:Yes	Decreased	-0.000556795	345	51	0.626863	1
k__Bacteria|p__Cyanobacteria|c__Chloroplast	PPI:Yes	Increased	0.000184779	345	72	0.627925	1
k__Bacteria|p__Firmicutes|c__Clostridia|o__Clostridiales|f__Lachnospiraceae|[g__Dorea/g__[Ruminococcus]]	PPI:Yes	Increased	0.00043684	345	282	0.634865	1
k__Bacteria|p__Firmicutes|c__Clostridia|o__Clostridiales|f__Tissierellaceae|g__Anaerococcus	PPI:Yes	Decreased	-0.000130845	345	69	0.635264	1
k__Bacteria|p__Firmicutes|c__Clostridia|o__Clostridiales|f__Tissierellaceae|g__1-68	PPI:Yes	Decreased	-6.16e-05	345	8	0.638352	1
k__Bacteria|p__Firmicutes|c__Clostridia|o__Clostridiales|f__Veillonellaceae|g__Acidaminococcus	PPI:Yes	Decreased	-0.00141404	345	50	0.638673	1
k__Bacteria|p__Proteobacteria|c__Alphaproteobacteria|o__Rickettsiales|f__mitochondria|[g__Zea/g__Oryza]	PPI:Yes	Decreased	-5.09e-05	345	6	0.639638	1
k__Bacteria|p__Firmicutes|c__Clostridia|o__Clostridiales|f__Lachnospiraceae|g__Ruminococcus|s__gnavus	PPI:Yes	Increased	0.00136796	345	344	0.641767	1
k__Bacteria|p__Firmicutes|c__Clostridia|o__Clostridiales|f__Lachnospiraceae|g__Lachnobacterium	PPI:Yes	Increased	0.000358474	345	110	0.641799	1
k__Bacteria|p__Firmicutes|c__Bacilli|o__Bacillales|f__Paenibacillaceae	PPI:Yes	Decreased	-3.04e-05	345	5	0.643817	1
k__Bacteria|p__Verrucomicrobia|c__Verruco-5|o__WCHB1-41|f__RFP12	PPI:Yes	Decreased	-0.000195146	345	3	0.643852	1
k__Bacteria|p__Firmicutes|c__Bacilli|o__Bacillales|f__Listeriaceae|g__Brochothrix|s__thermosphacta	PPI:Yes	Decreased	-2.23e-05	345	2	0.647205	1
k__Bacteria|p__Lentisphaerae|c__Lentisphaeria	PPI:Yes	Decreased	-0.000532612	345	52	0.651976	1
k__Bacteria|p__Proteobacteria|c__Alphaproteobacteria|o__Rhizobiales|f__Methylobacteriaceae	PPI:Yes	Increased	8.34e-05	345	13	0.654259	1
k__Bacteria|p__Bacteroidetes|c__Bacteroidia|o__Bacteroidales|f__Bacteroidaceae|g__Bacteroides|s__coprophilus	PPI:Yes	Decreased	-0.0010518	345	22	0.659009	1
k__Bacteria|p__Proteobacteria|c__Gammaproteobacteria|o__Enterobacteriales|f__Enterobacteriaceae|g__Enterobacter	PPI:Yes	Decreased	-0.000446328	345	44	0.666418	1
k__Bacteria|p__Actinobacteria|c__Actinobacteria|o__Bifidobacteriales|f__Bifidobacteriaceae|g__Bifidobacterium|[s__thermacidophilum/s__animalis]	PPI:Yes	Decreased	-0.000367293	345	62	0.669905	1
k__Bacteria|p__Firmicutes|c__Bacilli|o__Lactobacillales|f__Leuconostocaceae|g__Leuconostoc|s__mesenteroides	PPI:Yes	Decreased	-0.000137469	345	77	0.670253	1
k__Bacteria|p__Firmicutes|c__Clostridia|o__Clostridiales|f__Lachnospiraceae|g__Epulopiscium	PPI:Yes	Decreased	-0.000674773	345	31	0.670547	1
k__Bacteria|p__Firmicutes|c__Clostridia|o__Clostridiales|f__Lachnospiraceae|g__Clostridium|s__lavalense	PPI:Yes	Decreased	-3.51e-05	345	4	0.671149	1
k__Bacteria|p__Firmicutes|c__Clostridia|o__Clostridiales|f__Lachnospiraceae|g__Clostridium|s__clostridioforme	PPI:Yes	Increased	0.000429817	345	309	0.673307	1
k__Bacteria|p__Firmicutes|c__Bacilli|o__Bacillales|f__Paenibacillaceae|g__Paenibacillus	PPI:Yes	Decreased	-1.73e-05	345	1	0.675165	1
k__Bacteria|p__Firmicutes|c__Bacilli|o__Lactobacillales|f__Aerococcaceae|g__Alloiococcus	PPI:Yes	Decreased	-8.32e-06	345	1	0.677596	1
k__Bacteria|p__Proteobacteria	PPI:Yes	Increased	0.0027337	345	341	0.680649	1
k__Bacteria|p__Firmicutes|c__Bacilli|o__Bacillales|f__Bacillaceae	PPI:Yes	Decreased	-0.000178448	345	58	0.683167	1
k__Bacteria|p__Proteobacteria|c__Gammaproteobacteria|o__Enterobacteriales|f__Enterobacteriaceae|[g__Enterobacter/g__Erwinia]	PPI:Yes	Decreased	-4.85e-05	345	1	0.688274	1
k__Bacteria|p__Proteobacteria|c__Betaproteobacteria|o__Burkholderiales|f__Oxalobacteraceae|g__Janthinobacterium	PPI:Yes	Decreased	-6.86e-05	345	1	0.688274	1
k__Bacteria|p__Proteobacteria|c__Betaproteobacteria|o__Burkholderiales|f__Oxalobacteraceae|g__Janthinobacterium|s__lividum	PPI:Yes	Decreased	-6.86e-05	345	1	0.688274	1
k__Bacteria|p__Firmicutes|c__Clostridia|o__Clostridiales|f__Clostridiaceae|g__Clostridium|s__butyricum	PPI:Yes	Decreased	-4.75e-05	345	2	0.691267	1
k__Bacteria|p__Firmicutes|c__Erysipelotrichi|o__Erysipelotrichales|f__Erysipelotrichaceae|g__Clostridium	PPI:Yes	Decreased	-0.000736989	345	234	0.693761	1
k__Bacteria|p__Firmicutes|c__Clostridia|o__Clostridiales|f__Veillonellaceae|g__Dialister	PPI:Yes	Decreased	-0.00594346	345	308	0.695997	1
k__Bacteria|p__Actinobacteria|c__Actinobacteria|o__Actinomycetales|f__Nocardiaceae	PPI:Yes	Increased	4.33e-05	345	10	0.696995	1
k__Bacteria|p__Actinobacteria|c__Actinobacteria|o__Actinomycetales|f__Nocardiaceae|g__Rhodococcus	PPI:Yes	Increased	4.33e-05	345	10	0.696995	1
k__Bacteria|p__Firmicutes|c__Clostridia|o__Clostridiales|[f__Clostridiaceae/f__Veillonellaceae]	PPI:Yes	Decreased	-0.000319968	345	116	0.699154	1
k__Bacteria|p__Proteobacteria|c__Betaproteobacteria|o__Neisseriales|f__Neisseriaceae|g__Neisseria	PPI:Yes	Increased	8.17e-05	345	14	0.699309	1
k__Bacteria|p__Bacteroidetes|c__Bacteroidia|o__Bacteroidales|f__Barnesiellaceae|g__Barnesiella|s__viscericola	PPI:Yes	Decreased	-0.000460695	345	8	0.702367	1
k__Bacteria|p__Proteobacteria|c__Alphaproteobacteria|o__Rickettsiales|f__mitochondria|g__Malus|s__x_domestica	PPI:Yes	Increased	7.42e-05	345	11	0.707399	1
k__Bacteria|p__Tenericutes|c__Mollicutes|o__RF39	PPI:Yes	Increased	0.00200866	345	187	0.711609	1
k__Bacteria|p__Firmicutes|c__Clostridia|o__Clostridiales|f__Ruminococcaceae|g__Oscillospira|s__guilliermondii	PPI:Yes	Decreased	-2.91e-05	345	2	0.715029	1
k__Bacteria|p__Actinobacteria|c__Actinobacteria|o__Actinomycetales|f__Actinomycetaceae|g__Arcanobacterium	PPI:Yes	Increased	2.56e-05	345	4	0.71565	1
k__Bacteria|p__Bacteroidetes|c__Bacteroidia|o__Bacteroidales|f__Porphyromonadaceae|g__Parabacteroides|s__distasonis	PPI:Yes	Increased	0.00182447	345	291	0.721339	1
k__Bacteria|p__Bacteroidetes|c__Bacteroidia|o__Bacteroidales|f__Bacteroidaceae|g__Bacteroides|s__ovatus	PPI:Yes	Decreased	-0.00168146	345	303	0.726225	1
k__Bacteria|p__Firmicutes|c__Bacilli|o__Lactobacillales|f__Leuconostocaceae|g__Weissella|s__paramesenteroides	PPI:Yes	Decreased	-2.03e-05	345	2	0.727985	1
k__Bacteria|p__Bacteroidetes|c__Bacteroidia|o__Bacteroidales|f__Prevotellaceae|g__Prevotella|s__melaninogenica	PPI:Yes	Decreased	-4.03e-05	345	2	0.730131	1
k__Bacteria|p__Firmicutes|c__Erysipelotrichi|o__Erysipelotrichales|f__Erysipelotrichaceae|g__p-75-a5	PPI:Yes	Decreased	-7.74e-05	345	9	0.730579	1
k__Bacteria|p__Proteobacteria|c__Gammaproteobacteria|o__Enterobacteriales|f__Enterobacteriaceae|g__Enterobacter|s__aerogenes	PPI:Yes	Decreased	-1.38e-05	345	1	0.734247	1
k__Bacteria|p__Proteobacteria|c__Gammaproteobacteria|o__Enterobacteriales|f__Enterobacteriaceae|g__Enterobacter|s__kobei	PPI:Yes	Decreased	-1.38e-05	345	1	0.734247	1
k__Bacteria|p__Proteobacteria|c__Gammaproteobacteria|o__Enterobacteriales|f__Enterobacteriaceae|[g__Klebsiella/g__Leclercia]	PPI:Yes	Decreased	-1.95e-05	345	1	0.734247	1
k__Bacteria|p__Firmicutes|c__Clostridia|o__Clostridiales|f__Clostridiaceae|g__Clostridium|s__celatum	PPI:Yes	Increased	6.24e-06	345	1	0.734834	1
k__Bacteria|p__Firmicutes|c__Clostridia|o__Clostridiales|f__Veillonellaceae|g__Anaerovibrio	PPI:Yes	Increased	9.73e-05	345	1	0.734834	1
k__Bacteria|p__Proteobacteria|c__Alphaproteobacteria|o__Rhizobiales|f__Methylobacteriaceae|g__Magnetospirillum|s__magnetotacticum	PPI:Yes	Decreased	-1.53e-05	345	1	0.736354	1
k__Bacteria|p__Firmicutes|c__Bacilli|o__Bacillales|f__Bacillaceae|g__Bacillus|s__humi	PPI:Yes	Decreased	-2.16e-05	345	1	0.736354	1
k__Bacteria|p__Verrucomicrobia	PPI:Yes	Decreased	-0.00428134	345	277	0.736432	1
k__Bacteria|p__Firmicutes|c__Bacilli|o__Bacillales|f__Bacillaceae|g__Anoxybacillus	PPI:Yes	Decreased	-2.27e-05	345	2	0.737406	1
k__Bacteria|p__Firmicutes|c__Bacilli|o__Bacillales|f__Bacillaceae|g__Anoxybacillus|s__kestanbolensis	PPI:Yes	Decreased	-2.27e-05	345	2	0.737406	1
k__Bacteria|p__Firmicutes|c__Bacilli|o__Bacillales|f__Staphylococcaceae|g__Staphylococcus|[s__haemolyticus/s__aureus]	PPI:Yes	Increased	9.37e-06	345	1	0.738237	1
k__Bacteria|p__Firmicutes|c__Bacilli|o__Lactobacillales|[f__Carnobacteriaceae/f__Aerococcaceae]	PPI:Yes	Increased	1.32e-05	345	1	0.738237	1
k__Bacteria|p__Firmicutes|c__Clostridia|o__Clostridiales|f__Lachnospiraceae|g__Butyrivibrio	PPI:Yes	Decreased	-0.000111241	345	107	0.739679	1
k__Bacteria|p__Firmicutes|c__Bacilli|o__Bacillales|f__Planococcaceae|g__Solibacillus	PPI:Yes	Increased	0.000121564	345	38	0.739728	1
k__Bacteria|p__Bacteroidetes|c__Bacteroidia|o__Bacteroidales|f__RF16	PPI:Yes	Decreased	-0.000627498	345	3	0.742821	1
k__Bacteria|p__Bacteroidetes|c__Bacteroidia|o__Bacteroidales|f__Prevotellaceae	PPI:Yes	Increased	0.00448002	345	246	0.745132	1
k__Bacteria|p__Bacteroidetes|c__Bacteroidia|o__Bacteroidales|f__Prevotellaceae|g__Prevotella	PPI:Yes	Increased	0.00447578	345	246	0.74536	1
k__Bacteria|p__Lentisphaerae|c__Lentisphaeria|o__Z20|f__R4-45B	PPI:Yes	Increased	9.72e-05	345	2	0.746281	1
k__Bacteria|p__Firmicutes|c__Clostridia|o__Clostridiales|f__Eubacteriaceae	PPI:Yes	Increased	0.000382173	345	233	0.746998	1
k__Bacteria|p__Verrucomicrobia|c__Verrucomicrobiae|o__Verrucomicrobiales|f__Verrucomicrobiaceae	PPI:Yes	Decreased	-0.00409617	345	277	0.74756	1
k__Bacteria|p__Verrucomicrobia|c__Verrucomicrobiae|o__Verrucomicrobiales|f__Verrucomicrobiaceae|g__Akkermansia	PPI:Yes	Decreased	-0.00409617	345	277	0.74756	1
k__Bacteria|p__Proteobacteria|c__Gammaproteobacteria|o__Enterobacteriales|f__Enterobacteriaceae|[g__Klebsiella/g__Kluyvera]	PPI:Yes	Decreased	-5.74e-05	345	6	0.747954	1
k__Bacteria|p__Verrucomicrobia|c__Verrucomicrobiae|o__Verrucomicrobiales|f__Verrucomicrobiaceae|g__Akkermansia|s__muciniphila	PPI:Yes	Decreased	-0.00405813	345	276	0.749964	1
k__Bacteria|p__Firmicutes|c__Clostridia|o__Clostridiales|f__Clostridiaceae|g__Clostridium|s__neonatale	PPI:Yes	Decreased	-2.63e-05	345	2	0.755813	1
k__Bacteria|p__Spirochaetes	PPI:Yes	Decreased	-0.000137754	345	2	0.756539	1
k__Bacteria|p__Spirochaetes|c__Spirochaetes|o__Spirochaetales|f__Spirochaetaceae|g__Treponema	PPI:Yes	Decreased	-0.000137754	345	2	0.756539	1
k__Bacteria|p__Firmicutes|c__Clostridia|o__Clostridiales|f__Lachnospiraceae|g__Clostridium|s__saccharolyticum	PPI:Yes	Increased	1.5e-05	345	2	0.757209	1
k__Bacteria|p__Actinobacteria|c__Coriobacteriia|o__Coriobacteriales|f__Coriobacteriaceae|g__Paraeggerthella|s__hongkongensis	PPI:Yes	Increased	3.02e-05	345	2	0.757883	1
k__Bacteria|p__Proteobacteria|c__Alphaproteobacteria|o__Rickettsiales|f__mitochondria|g__Galbulimima|s__belgraveana	PPI:Yes	Increased	9.85e-06	345	1	0.759262	1
k__Bacteria|p__Proteobacteria|c__Betaproteobacteria|o__Neisseriales|f__Neisseriaceae|g__Neisseria|s__cinerea	PPI:Yes	Decreased	-1.78e-05	345	3	0.763809	1
k__Bacteria|p__Proteobacteria|c__Gammaproteobacteria|o__Enterobacteriales|f__Enterobacteriaceae|[g__Pantoea/g__Kluyvera]	PPI:Yes	Decreased	-4.13e-05	345	7	0.769966	1
k__Bacteria|p__Firmicutes|c__Erysipelotrichi|o__Erysipelotrichales|f__Erysipelotrichaceae|g__Clostridium|s__saccharogumia	PPI:Yes	Decreased	-0.000480421	345	69	0.771189	1
k__Bacteria|p__Firmicutes|c__Bacilli|o__Bacillales|[f__Bacillaceae/f__Staphylococcaceae]	PPI:Yes	Increased	8.57e-06	345	1	0.778655	1
k__Bacteria|p__Proteobacteria|c__Gammaproteobacteria|o__Enterobacteriales|f__Enterobacteriaceae|g__Enterobacter|s__hormaechei	PPI:Yes	Decreased	-0.000131335	345	27	0.778856	1
k__Bacteria|p__Cyanobacteria|c__Oscillatoriophycideae	PPI:Yes	Decreased	-1.63e-05	345	1	0.782588	1
k__Bacteria|p__Cyanobacteria|c__Oscillatoriophycideae|o__Oscillatoriales|f__Phormidiaceae	PPI:Yes	Decreased	-1.63e-05	345	1	0.782588	1
k__Bacteria|p__Cyanobacteria|c__Oscillatoriophycideae|o__Oscillatoriales|f__Phormidiaceae|g__Arthrospira|s__platensis	PPI:Yes	Decreased	-1.63e-05	345	1	0.782588	1
k__Bacteria|p__Firmicutes|c__Clostridia|o__Clostridiales|[f__Ruminococcaceae/f__Clostridiaceae/f__Veillonellaceae]	PPI:Yes	Decreased	-1.15e-05	345	1	0.782588	1
k__Bacteria|p__Firmicutes|c__Clostridia|o__Clostridiales|f__Tissierellaceae|g__Finegoldia	PPI:Yes	Increased	0.000114468	345	79	0.785575	1
k__Bacteria|p__Bacteroidetes|c__Flavobacteriia|o__Flavobacteriales|f__Weeksellaceae|g__Chryseobacterium	PPI:Yes	Decreased	-9.54e-06	345	1	0.786673	1
k__Bacteria|p__Proteobacteria|c__Gammaproteobacteria|o__Pseudomonadales|f__Moraxellaceae|g__Acinetobacter|s__lwoffii	PPI:Yes	Decreased	-1.65e-05	345	1	0.786673	1
k__Bacteria|p__Proteobacteria|c__Gammaproteobacteria|o__Enterobacteriales|f__Enterobacteriaceae|g__Serratia|s__marcescens	PPI:Yes	Decreased	-3.58e-05	345	14	0.786969	1
k__Bacteria|p__Firmicutes|c__Bacilli|o__Bacillales|f__Planococcaceae|g__Rummeliibacillus	PPI:Yes	Increased	8.1e-06	345	1	0.787762	1
k__Bacteria|p__Lentisphaerae|c__Lentisphaeria|o__Victivallales|f__Victivallaceae|g__Victivallis|s__vadensis	PPI:Yes	Increased	7.43e-05	345	23	0.788972	1
k__Bacteria|p__Actinobacteria|c__Actinobacteria|o__Actinomycetales|f__Corynebacteriaceae|g__Corynebacterium|s__stationis	PPI:Yes	Increased	1.47e-05	345	1	0.789302	1
k__Bacteria|p__Actinobacteria|c__Actinobacteria|o__Actinomycetales|f__Corynebacteriaceae|g__Corynebacterium|s__variabile	PPI:Yes	Increased	1.47e-05	345	1	0.789302	1
k__Bacteria|p__Firmicutes|c__Clostridia|o__Clostridiales|f__Christensenellaceae	PPI:Yes	Decreased	-0.00123866	345	317	0.792819	1
k__Bacteria|p__Firmicutes|c__Clostridia|o__Clostridiales|f__Lachnospiraceae|g__Blautia|s__producta	PPI:Yes	Increased	0.00112938	345	264	0.794803	1
k__Bacteria|p__Proteobacteria|c__Alphaproteobacteria|o__Rhizobiales|f__Rhizobiaceae|g__Agrobacterium	PPI:Yes	Decreased	-6.93e-06	345	1	0.797808	1
k__Bacteria|p__Firmicutes|c__Bacilli|o__Bacillales|f__Paenibacillaceae|g__Brevibacillus	PPI:Yes	Decreased	-1.31e-05	345	4	0.799559	1
k__Bacteria|p__Firmicutes|c__Clostridia|o__Clostridiales|f__Clostridiaceae|g__Clostridium|s__sartagoforme	PPI:Yes	Increased	0.000100929	345	88	0.800198	1
k__Bacteria|p__Firmicutes|c__Clostridia|o__Clostridiales|f__Veillonellaceae|[g__Dialister/g__Veillonella]	PPI:Yes	Increased	1.98e-05	345	4	0.801355	1
k__Bacteria|p__Proteobacteria|c__Betaproteobacteria|o__Burkholderiales|f__Comamonadaceae|g__Diaphorobacter|s__nitroreducens	PPI:Yes	Increased	8.43e-06	345	1	0.802665	1
k__Bacteria|p__Proteobacteria|c__Betaproteobacteria|o__Neisseriales|f__Neisseriaceae|g__Neisseria|s__shayeganii	PPI:Yes	Increased	1.19e-05	345	1	0.802665	1
k__Bacteria|p__Actinobacteria|c__Actinobacteria|o__Bifidobacteriales|f__Bifidobacteriaceae|g__Bifidobacterium|s__thermacidophilum	PPI:Yes	Decreased	-1.33e-05	345	2	0.803255	1
k__Bacteria|p__Firmicutes|c__Clostridia|o__Clostridiales|f__Clostridiaceae|g__Clostridium|s__tyrobutyricum	PPI:Yes	Decreased	-8.54e-06	345	1	0.804732	1
k__Bacteria|p__Proteobacteria|c__Betaproteobacteria|o__Burkholderiales|f__Comamonadaceae|g__Delftia	PPI:Yes	Increased	1.11e-05	345	2	0.805921	1
k__Bacteria|p__Proteobacteria|c__Gammaproteobacteria|o__Enterobacteriales|f__Enterobacteriaceae|[g__Klebsiella/g__Enterobacter/g__Kluyvera]	PPI:Yes	Increased	2.33e-05	345	4	0.806188	1
k__Bacteria|p__Firmicutes|c__Clostridia|o__Clostridiales|f__Lachnospiraceae|g__Clostridium	PPI:Yes	Decreased	-0.000267017	345	320	0.807604	1
k__Bacteria|p__Actinobacteria|c__Actinobacteria|o__Actinomycetales|f__Corynebacteriaceae|g__Corynebacterium|s__durum	PPI:Yes	Increased	0.000151552	345	160	0.812941	1
k__Bacteria|p__Proteobacteria|c__Alphaproteobacteria|o__Rhizobiales|f__Methylobacteriaceae|g__Methylobacterium|s__komagatae	PPI:Yes	Increased	3.69e-05	345	10	0.814939	1
k__Bacteria|p__Proteobacteria|c__Gammaproteobacteria|o__Enterobacteriales|f__Enterobacteriaceae|g__Enterobacter|s__cloacae	PPI:Yes	Decreased	-0.000129993	345	23	0.815532	1
k__Bacteria|p__Firmicutes|c__Bacilli|o__Bacillales|f__Bacillaceae|g__Bacillus|s__clausii	PPI:Yes	Decreased	-3.49e-05	345	9	0.815551	1
k__Bacteria|p__Proteobacteria|c__Alphaproteobacteria|o__Rickettsiales|f__mitochondria|g__Vitis|s__vinifera	PPI:Yes	Decreased	-1.97e-05	345	3	0.816278	1
k__Bacteria|p__Proteobacteria|c__Gammaproteobacteria|o__Enterobacteriales|f__Enterobacteriaceae|g__Enterobacter|s__turicensis	PPI:Yes	Increased	5.13e-05	345	7	0.819645	1
k__Bacteria|p__Firmicutes|c__Clostridia|o__Clostridiales|f__Lachnospiraceae|g__Ruminococcus	PPI:Yes	Decreased	-0.00152643	345	345	0.822316	1
k__Bacteria|p__Firmicutes|c__Bacilli|o__Lactobacillales|f__Streptococcaceae|[g__Streptococcus/g__Lactococcus]	PPI:Yes	Decreased	-0.000100369	345	50	0.823471	1
k__Bacteria|p__Actinobacteria|c__Thermoleophilia|o__Gaiellales	PPI:Yes	Decreased	-8.55e-06	345	1	0.826734	1
k__Bacteria|p__Cyanobacteria|c__Chloroplast|o__Chlorophyta	PPI:Yes	Decreased	-8.55e-06	345	1	0.826734	1
k__Bacteria|p__Proteobacteria|c__Gammaproteobacteria|o__Legionellales	PPI:Yes	Decreased	-8.55e-06	345	1	0.826734	1
k__Bacteria|p__Proteobacteria|c__Gammaproteobacteria|o__Legionellales|f__Legionellaceae	PPI:Yes	Decreased	-8.55e-06	345	1	0.826734	1
k__Bacteria|p__Proteobacteria|c__Epsilonproteobacteria|o__Campylobacterales	PPI:Yes	Increased	7.06e-05	345	18	0.829256	1
k__Bacteria|p__Firmicutes|c__Clostridia|o__Clostridiales|f__Ruminococcaceae|g__Ruminococcus	PPI:Yes	Decreased	-0.00422181	345	345	0.829387	1
k__Bacteria|p__Firmicutes|c__Bacilli|o__Lactobacillales|f__Lactobacillaceae|g__Pediococcus	PPI:Yes	Decreased	-0.000201406	345	32	0.83086	1
k__Bacteria|p__Firmicutes|c__Bacilli|o__Bacillales|f__Staphylococcaceae|g__Staphylococcus|s__sciuri	PPI:Yes	Decreased	-4.63e-06	345	1	0.836114	1
k__Bacteria|p__Firmicutes|c__Clostridia|o__Clostridiales|f__Peptococcaceae	PPI:Yes	Increased	0.00024101	345	177	0.837048	1
k__Bacteria|p__Firmicutes|c__Clostridia|o__Clostridiales|[f__Christensenellaceae/f__Ruminococcaceae]	PPI:Yes	Decreased	-0.000130494	345	97	0.839064	1
k__Bacteria|p__Firmicutes|c__Clostridia|o__Clostridiales|f__Ruminococcaceae|g__Oscillospira	PPI:Yes	Decreased	-0.000787216	345	345	0.840699	1
k__Bacteria|p__Proteobacteria|c__Gammaproteobacteria|o__Enterobacteriales|f__Enterobacteriaceae|g__Raoultella	PPI:Yes	Decreased	-4.39e-05	345	3	0.842319	1
k__Bacteria|p__Firmicutes|c__Bacilli|o__Bacillales|f__Bacillaceae|g__Anaerobacillus	PPI:Yes	Increased	6.89e-06	345	1	0.84354	1
k__Bacteria|p__Firmicutes|c__Bacilli|o__Lactobacillales|f__Enterococcaceae|g__Enterococcus|s__cecorum	PPI:Yes	Decreased	-4.64e-06	345	1	0.844056	1
k__Bacteria|p__Actinobacteria|c__Coriobacteriia|o__Coriobacteriales|f__Coriobacteriaceae	PPI:Yes	Increased	0.00220868	345	345	0.844762	1
k__Bacteria|p__Actinobacteria|c__Actinobacteria|o__Actinomycetales|f__Microbacteriaceae	PPI:Yes	Increased	2.17e-05	345	7	0.847008	1
k__Bacteria|p__Firmicutes|c__Clostridia|o__Clostridiales|f__Veillonellaceae|g__Megamonas	PPI:Yes	Decreased	-0.000776851	345	27	0.851921	1
k__Bacteria|p__Firmicutes|c__Clostridia|o__Clostridiales|f__Clostridiaceae|g__Clostridium|s__disporicum	PPI:Yes	Increased	0.00017115	345	165	0.852917	1
k__Bacteria|p__Firmicutes|c__Clostridia|o__Clostridiales|[f__Ruminococcaceae/f__Veillonellaceae]	PPI:Yes	Increased	0.000151739	345	17	0.853235	1
k__Bacteria|p__Proteobacteria|c__Gammaproteobacteria|o__Aeromonadales	PPI:Yes	Increased	0.000211519	345	5	0.855449	1
k__Bacteria|p__Proteobacteria|c__Gammaproteobacteria|o__Aeromonadales|f__Succinivibrionaceae	PPI:Yes	Increased	0.000211519	345	5	0.855449	1
k__Bacteria|p__Proteobacteria|c__Gammaproteobacteria|o__Aeromonadales|f__Succinivibrionaceae|g__Succinivibrio	PPI:Yes	Increased	0.000211519	345	5	0.855449	1
k__Bacteria|p__Bacteroidetes|c__Bacteroidia|o__Bacteroidales|f__Paraprevotellaceae|g__Paraprevotella	PPI:Yes	Decreased	-0.00079185	345	140	0.856411	1
k__Bacteria|p__Firmicutes|c__Clostridia|o__Clostridiales|f__Veillonellaceae|g__Mitsuokella	PPI:Yes	Increased	0.000439205	345	42	0.858063	1
k__Bacteria|p__Tenericutes|c__Mollicutes	PPI:Yes	Increased	0.00098307	345	195	0.858311	1
k__Bacteria|p__Firmicutes|c__Clostridia|o__Clostridiales|f__Eubacteriaceae|g__Anaerofustis	PPI:Yes	Increased	0.000169517	345	221	0.861949	1
k__Bacteria|p__Firmicutes|c__Bacilli|o__Bacillales|f__Bacillaceae|g__Bacillus|s__cereus	PPI:Yes	Decreased	-1.77e-05	345	4	0.862348	1
k__Bacteria|p__Bacteroidetes|c__Bacteroidia|o__Bacteroidales|f__Bacteroidaceae	PPI:Yes	Decreased	-0.00339762	345	344	0.862865	1
k__Bacteria|p__Bacteroidetes|c__Bacteroidia|o__Bacteroidales|f__Bacteroidaceae|g__Bacteroides	PPI:Yes	Decreased	-0.00339762	345	344	0.862865	1
k__Bacteria|p__Actinobacteria|c__Actinobacteria|o__Actinomycetales|f__Tsukamurellaceae|g__Tsukamurella	PPI:Yes	Decreased	-1.55e-06	345	1	0.862959	1
k__Bacteria|p__Firmicutes|c__Clostridia|o__OPB54	PPI:Yes	Decreased	-1.55e-06	345	1	0.862959	1
k__Bacteria|p__Proteobacteria|c__Betaproteobacteria|o__Burkholderiales|f__Oxalobacteraceae|g__Collimonas	PPI:Yes	Decreased	-1.55e-06	345	1	0.862959	1
k__Bacteria|p__Firmicutes|c__Clostridia|o__Clostridiales|f__Lachnospiraceae|g__Butyrivibrio|s__crossotus	PPI:Yes	Decreased	-5.74e-05	345	103	0.863487	1
k__Bacteria|p__Bacteroidetes|c__Bacteroidia|o__Bacteroidales|f__Prevotellaceae|g__Prevotella|s__stercorea	PPI:Yes	Decreased	-0.000669977	345	35	0.863536	1
k__Bacteria|p__Proteobacteria|c__Gammaproteobacteria|o__Enterobacteriales|f__Enterobacteriaceae|g__Pantoea|s__dispersa	PPI:Yes	Increased	4.82e-06	345	1	0.866027	1
k__Bacteria|p__Proteobacteria|c__Gammaproteobacteria|o__Pasteurellales|f__Pasteurellaceae|g__Aggregatibacter|s__pneumotropica	PPI:Yes	Increased	4.82e-06	345	1	0.866027	1
k__Bacteria|p__Firmicutes|c__Clostridia|o__Clostridiales|f__Tissierellaceae|g__Sedimentibacter	PPI:Yes	Increased	4.82e-06	345	1	0.866027	1
k__Bacteria|p__Firmicutes|c__Bacilli|o__Turicibacterales|f__Turicibacteraceae|g__Turicibacter	PPI:Yes	Increased	0.000814818	345	273	0.869367	1
k__Bacteria|p__Firmicutes|c__Clostridia|o__Clostridiales|f__Ruminococcaceae|g__Clostridium|s__methylpentosum	PPI:Yes	Increased	6.55e-05	345	51	0.869696	1
k__Bacteria|p__Actinobacteria|c__Actinobacteria|o__Actinomycetales|f__Micrococcaceae|g__Kocuria|s__kristinae	PPI:Yes	Decreased	-7.25e-06	345	2	0.873927	1
k__Bacteria|p__Actinobacteria|c__Actinobacteria|o__Actinomycetales|f__Brevibacteriaceae|g__Brevibacterium	PPI:Yes	Increased	1.78e-05	345	2	0.87659	1
k__Bacteria|p__Firmicutes|c__Bacilli|o__Lactobacillales|f__Enterococcaceae|g__Enterococcus|s__casseliflavus	PPI:Yes	Decreased	-7.21e-05	345	18	0.87766	1
k__Bacteria|p__Bacteroidetes|c__Bacteroidia|o__Bacteroidales|f__Paraprevotellaceae|g__CF231	PPI:Yes	Increased	5.8e-05	345	2	0.878374	1
k__Bacteria|p__Actinobacteria|c__Actinobacteria|o__Actinomycetales|f__Micrococcaceae|g__Arthrobacter	PPI:Yes	Decreased	-1.71e-05	345	5	0.882022	1
k__Bacteria|p__Proteobacteria|c__Betaproteobacteria	PPI:Yes	Increased	0.000631193	345	307	0.888859	1
k__Bacteria|p__Firmicutes|c__Clostridia|o__Clostridiales|f__Lachnospiraceae|g__Anaerostipes	PPI:Yes	Increased	0.000484685	345	324	0.891024	1
k__Bacteria|p__Proteobacteria|c__Betaproteobacteria|o__Burkholderiales	PPI:Yes	Increased	0.000601203	345	307	0.894117	1
k__Bacteria|p__Firmicutes|c__Bacilli|o__Bacillales|f__Bacillaceae|g__Bacillus|s__coagulans	PPI:Yes	Decreased	-5.12e-06	345	1	0.895182	1
k__Bacteria|p__Proteobacteria|c__Gammaproteobacteria|o__Enterobacteriales|f__Enterobacteriaceae|g__Enterobacter|s__ludwigii	PPI:Yes	Increased	6.61e-05	345	17	0.895279	1
k__Bacteria|p__Firmicutes|c__Erysipelotrichi|o__Erysipelotrichales|f__Erysipelotrichaceae|g__RFN20	PPI:Yes	Increased	5.14e-05	345	10	0.896507	1
k__Bacteria|p__Firmicutes|c__Bacilli|o__Bacillales|f__Paenibacillaceae|g__Brevibacillus|s__reuszeri	PPI:Yes	Increased	4.02e-06	345	2	0.899798	1
k__Bacteria|p__Firmicutes|c__Clostridia|o__Clostridiales|f__Syntrophomonadaceae|g__Syntrophomonas	PPI:Yes	Decreased	-5.78e-06	345	1	0.903203	1
k__Bacteria|p__Firmicutes|c__Erysipelotrichi|o__Erysipelotrichales|f__Erysipelotrichaceae|g__Clostridium|s__ramosum	PPI:Yes	Increased	9.25e-05	345	169	0.90481	1
k__Bacteria|p__Firmicutes|c__Clostridia|o__Clostridiales|f__Lachnospiraceae|g__Moryella	PPI:Yes	Increased	2.91e-05	345	19	0.907941	1
k__Archaea|p__Euryarchaeota|c__Methanobacteria|o__Methanobacteriales|f__Methanobacteriaceae|g__Methanobrevibacter|s__arboriphilus	PPI:Yes	Increased	7.65e-06	345	2	0.913714	1
k__Bacteria|p__Firmicutes|c__Clostridia|o__Clostridiales|[f__Clostridiaceae/f__Lachnospiraceae]	PPI:Yes	Decreased	-0.000100207	345	158	0.914799	1
k__Bacteria|p__Firmicutes|c__Clostridia|o__Clostridiales|f__Veillonellaceae|g__Succiniclasticum	PPI:Yes	Decreased	-0.000290505	345	28	0.915075	1
k__Bacteria|p__Proteobacteria|c__Betaproteobacteria|o__Neisseriales|f__Neisseriaceae|g__Neisseria|s__subflava	PPI:Yes	Increased	5.67e-06	345	3	0.916258	1
k__Bacteria|p__Firmicutes|c__Clostridia|o__Clostridiales|f__Lachnospiraceae|g__Bacteroides|s__xylanolyticus	PPI:Yes	Increased	5.04e-06	345	1	0.916401	1
k__Bacteria|p__Tenericutes	PPI:Yes	Increased	0.000541212	345	199	0.921896	1
k__Bacteria|p__Firmicutes|c__Clostridia|o__Clostridiales|f__Peptostreptococcaceae|g__Clostridium|s__metallolevans	PPI:Yes	Decreased	-2.67e-06	345	1	0.922112	1
k__Bacteria|p__Proteobacteria|c__Gammaproteobacteria|[o__Pseudomonadales/o__Enterobacteriales]	PPI:Yes	Decreased	-2.29e-06	345	1	0.923807	1
k__Bacteria|p__Proteobacteria|c__Betaproteobacteria|o__Neisseriales|f__Neisseriaceae|g__Neisseria|s__oralis	PPI:Yes	Decreased	-3.28e-06	345	1	0.924342	1
k__Bacteria|p__Firmicutes|c__Clostridia|o__Clostridiales|f__Clostridiaceae|g__Clostridium|[s__tertium/s__sartagoforme]	PPI:Yes	Decreased	-2.01e-06	345	1	0.925374	1
k__Bacteria|p__Firmicutes|c__Clostridia|o__Clostridiales|f__Tissierellaceae|g__WAL_1855D	PPI:Yes	Decreased	-4.01e-05	345	52	0.92721	1
k__Bacteria|p__Firmicutes|c__Clostridia|o__SHA-98	PPI:Yes	Increased	5.48e-05	345	69	0.927616	1
k__Bacteria|p__Elusimicrobia|c__Elusimicrobia	PPI:Yes	Increased	9.79e-06	345	1	0.929252	1
k__Bacteria|p__Elusimicrobia|c__Elusimicrobia|o__Elusimicrobiales|f__Elusimicrobiaceae	PPI:Yes	Increased	9.79e-06	345	1	0.929252	1
k__Bacteria|p__Bacteroidetes|c__Bacteroidia|o__Bacteroidales|f__Rikenellaceae|g__human|s__gut_metagenome	PPI:Yes	Increased	0.000301023	345	31	0.929437	1
k__Bacteria|p__Proteobacteria|c__Gammaproteobacteria|o__Enterobacteriales|f__Enterobacteriaceae|g__Morganella	PPI:Yes	Increased	1.9e-06	345	1	0.929747	1
k__Bacteria|p__Proteobacteria|c__Gammaproteobacteria|o__Enterobacteriales|f__Enterobacteriaceae|g__Morganella|s__morganii	PPI:Yes	Increased	1.9e-06	345	1	0.929747	1
k__Bacteria|p__Actinobacteria|c__Coriobacteriia|o__Coriobacteriales|f__Coriobacteriaceae|g__Collinsella|s__aerofaciens	PPI:Yes	Increased	0.00100012	345	323	0.931677	1
k__Bacteria|p__Bacteroidetes|c__Bacteroidia|o__Bacteroidales	PPI:Yes	Increased	0.00193855	345	344	0.931916	1
k__Bacteria|p__Bacteroidetes	PPI:Yes	Increased	0.00193848	345	344	0.931918	1
k__Bacteria|p__Firmicutes|c__Clostridia|o__Clostridiales|f__Clostridiaceae|g__Sarcina	PPI:Yes	Increased	7.32e-05	345	165	0.932908	1
k__Bacteria|p__Actinobacteria|c__Coriobacteriia|o__Coriobacteriales|f__Coriobacteriaceae|g__Collinsella	PPI:Yes	Increased	0.000955857	345	328	0.933383	1
k__Bacteria|p__Bacteroidetes|c__Bacteroidia|o__Bacteroidales|f__Bacteroidaceae|g__Bacteroides|s__acidifaciens	PPI:Yes	Decreased	-6.03e-05	345	139	0.934976	1
k__Bacteria|p__Firmicutes|c__Clostridia|o__Clostridiales|f__Clostridiaceae|g__02d06	PPI:Yes	Decreased	-8.94e-05	345	257	0.939154	1
k__Bacteria|p__Proteobacteria|c__Gammaproteobacteria|o__Enterobacteriales|f__Enterobacteriaceae|g__Citrobacter|s__koseri	PPI:Yes	Decreased	-2.99e-05	345	5	0.940463	1
k__Bacteria|p__Firmicutes|c__Bacilli|o__Lactobacillales|f__Lactobacillaceae|g__Pediococcus|s__acidilactici	PPI:Yes	Decreased	-4.33e-05	345	10	0.941942	1
k__Bacteria|p__Firmicutes|c__Clostridia|o__Clostridiales|f__Lachnospiraceae|g__Coprococcus|s__catus	PPI:Yes	Decreased	-8.12e-05	345	288	0.946103	1
k__Bacteria|p__Actinobacteria|c__Actinobacteria|o__Actinomycetales|f__Microbacteriaceae|g__Rathayibacter	PPI:Yes	Decreased	-1.73e-06	345	1	0.946304	1
k__Bacteria|p__Actinobacteria|c__Actinobacteria|o__Actinomycetales|f__Microbacteriaceae|g__Rathayibacter|s__caricis	PPI:Yes	Decreased	-1.73e-06	345	1	0.946304	1
k__Bacteria|p__Fusobacteria|c__Fusobacteriia|o__Fusobacteriales|f__Leptotrichiaceae|g__Sneathia	PPI:Yes	Increased	6.19e-06	345	2	0.949714	1
k__Bacteria|p__Proteobacteria|c__Gammaproteobacteria|o__Enterobacteriales|f__Enterobacteriaceae|g__Proteus	PPI:Yes	Decreased	-2.56e-06	345	1	0.951746	1
k__Archaea|p__Euryarchaeota|c__Thermoplasmata|o__E2|f__Methanomassiliicoccaceae|g__Methanomassiliicoccus	PPI:Yes	Decreased	-4.62e-06	345	2	0.953667	1
k__Bacteria|p__Firmicutes|c__Clostridia|o__Clostridiales|f__EtOH8	PPI:Yes	Decreased	-1.98e-05	345	25	0.953707	1
k__Bacteria|p__Proteobacteria|c__Gammaproteobacteria|o__Pseudomonadales|f__Pseudomonadaceae|g__Pseudomonas|s__fragi	PPI:Yes	Decreased	-2.53e-06	345	2	0.953775	1
k__Bacteria|p__Bacteroidetes|c__Bacteroidia|o__Bacteroidales|f__Porphyromonadaceae|g__Porphyromonas	PPI:Yes	Increased	2.36e-05	345	38	0.955112	1
k__Bacteria|p__Actinobacteria|c__Coriobacteriia|o__Coriobacteriales|f__Coriobacteriaceae|g__Slackia	PPI:Yes	Increased	0.000126882	345	169	0.955234	1
k__Bacteria|p__Actinobacteria|c__Actinobacteria|o__Bifidobacteriales|f__Bifidobacteriaceae|g__Bifidobacterium|s__animalis	PPI:Yes	Increased	3.87e-05	345	160	0.957246	1
k__Bacteria|p__Firmicutes|c__Bacilli|o__Lactobacillales|f__Lactobacillaceae|g__Pediococcus|s__inopinatus	PPI:Yes	Decreased	-1.01e-06	345	1	0.961486	1
k__Bacteria|p__Tenericutes|c__Mollicutes|o__Mycoplasmatales|f__Mycoplasmataceae|g__Mycoplasma	PPI:Yes	Decreased	-2.26e-06	345	1	0.961486	1
k__Bacteria|p__Firmicutes|c__Bacilli|o__Lactobacillales|f__Aerococcaceae|g__Aerococcus	PPI:Yes	Decreased	-3.2e-06	345	1	0.961486	1
k__Bacteria|p__Firmicutes|c__Erysipelotrichi|o__Erysipelotrichales|f__Erysipelotrichaceae|g__Clostridium|s__cocleatum	PPI:Yes	Increased	1.29e-05	345	20	0.961665	1
k__Bacteria|p__Actinobacteria|c__Actinobacteria|o__Actinomycetales|f__Microbacteriaceae|g__Frigoribacterium	PPI:Yes	Decreased	-1.48e-06	345	1	0.965203	1
k__Bacteria|p__Firmicutes|c__Clostridia|o__Clostridiales|f__Tissierellaceae	PPI:Yes	Decreased	-3.6e-05	345	219	0.966416	1
k__Bacteria|p__Firmicutes|c__Clostridia|o__Clostridiales|f__Veillonellaceae	PPI:Yes	Decreased	-0.000544988	345	345	0.967227	1
k__Bacteria|p__Firmicutes|c__Clostridia|o__Clostridiales|f__Lachnospiraceae|g__Clostridium|s__citroniae	PPI:Yes	Increased	7.8e-06	345	17	0.969135	1
k__Bacteria|p__Proteobacteria|c__Betaproteobacteria|o__Burkholderiales|f__Alcaligenaceae	PPI:Yes	Increased	0.000166502	345	302	0.970457	1
k__Bacteria|p__Proteobacteria|c__Betaproteobacteria|o__Burkholderiales|f__Alcaligenaceae|g__Sutterella	PPI:Yes	Increased	0.000166502	345	302	0.970457	1
k__Bacteria|p__Proteobacteria|c__Gammaproteobacteria|o__Enterobacteriales|f__Enterobacteriaceae|g__Shigella|s__flexneri	PPI:Yes	Decreased	-1.13e-05	345	33	0.974484	1
k__Bacteria|p__Actinobacteria|c__Actinobacteria|o__Actinomycetales|f__Microbacteriaceae|g__Pseudoclavibacter	PPI:Yes	Decreased	-1.12e-06	345	1	0.975439	1
k__Bacteria|p__Actinobacteria|c__Actinobacteria|o__Actinomycetales|f__Microbacteriaceae|g__Pseudoclavibacter|s__bifida	PPI:Yes	Decreased	-1.12e-06	345	1	0.975439	1
k__Archaea|p__Euryarchaeota|c__Thermoplasmata|o__E2|f__Methanomassiliicoccaceae|g__vadinCA11	PPI:Yes	Increased	2.71e-06	345	4	0.981286	1
k__Bacteria|p__Firmicutes|c__Clostridia|o__Clostridiales|f__Clostridiaceae|g__Clostridium|s__carnis	PPI:Yes	Decreased	-6.02e-07	345	1	0.981736	1
k__Bacteria|p__Firmicutes|c__Clostridia|o__Clostridiales|f__Lachnospiraceae|g__Lachnoanaerobaculum|s__orale	PPI:Yes	Decreased	-6.02e-07	345	1	0.981736	1
k__Bacteria|p__Proteobacteria|c__Gammaproteobacteria|[o__Aeromonadales/o__Enterobacteriales]	PPI:Yes	Decreased	-3.66e-06	345	4	0.98212	1
k__Bacteria|p__Firmicutes|c__Bacilli|o__Lactobacillales|f__Carnobacteriaceae|g__Carnobacterium	PPI:Yes	Increased	2.3e-06	345	6	0.982444	1
k__Bacteria|p__Proteobacteria|c__Deltaproteobacteria	PPI:Yes	Increased	7.75e-05	345	284	0.98606	1
k__Bacteria|p__Proteobacteria|c__Deltaproteobacteria|o__Desulfovibrionales	PPI:Yes	Increased	7.75e-05	345	284	0.98606	1
k__Bacteria|p__Proteobacteria|c__Deltaproteobacteria|o__Desulfovibrionales|f__Desulfovibrionaceae	PPI:Yes	Increased	7.75e-05	345	284	0.98606	1
k__Bacteria|p__Firmicutes|c__Clostridia|o__Clostridiales|f__Lachnospiraceae|g__Clostridium|[s__clostridioforme/s__bolteae]	PPI:Yes	Increased	4.59e-06	345	42	0.988995	1
k__Archaea|p__Euryarchaeota|c__Thermoplasmata|o__E2|f__Methanomassiliicoccaceae	PPI:Yes	Decreased	-1.91e-06	345	6	0.989023	1
k__Bacteria|p__Firmicutes|c__Clostridia|o__Clostridiales|[f__Clostridiaceae/f__[Mogibacteriaceae]]	PPI:Yes	Increased	3.09e-05	345	256	0.990671	1
k__Bacteria|p__Proteobacteria|c__Gammaproteobacteria|o__Pseudomonadales	PPI:Yes	Decreased	-2.8e-06	345	27	0.991044	1
k__Bacteria|p__Firmicutes|c__Clostridia|o__Clostridiales|f__Lachnospiraceae|g__Roseburia|s__inulinivorans	PPI:Yes	Decreased	-1.27e-05	345	253	0.992206	1
k__Bacteria|p__Proteobacteria|c__Betaproteobacteria|o__Burkholderiales|f__Oxalobacteraceae|g__Herbaspirillum	PPI:Yes	Increased	1.58e-06	345	4	0.992634	1
k__Bacteria|p__Proteobacteria|c__Gammaproteobacteria|o__Enterobacteriales|f__Enterobacteriaceae|g__Klebsiella	PPI:Yes	Increased	1.09e-05	345	64	0.996643	1
k__Bacteria|p__Actinobacteria|c__Actinobacteria|o__Actinomycetales|f__Corynebacteriaceae|g__Corynebacterium|s__simulans	PPI:Yes	Increased	1.59e-07	345	1	0.996745	1
